# Supplementary material for: Loss of FLCN-FNIP1/2 induces a non-canonical interferon response in human renal tubular epithelial cells
Source: eLife. 2021 Jan 18;10:e61630. doi: 10.7554/eLife.61630 (PMC7899648; doi:10.7554/eLife.61630)
Supplement: Figure 3—source data 1. [file elife-61630-fig3-data1.xlsx]

## Sheet: Fig 3B
Name	Cp	cp	cp1 std	cp1 std	gem	gem std	normalized for HPRT/TBP	normalized for HPRT/TBP std	foldchange	foldchange std
P53KO C1_AMDH	31.39	31.31	3.5536e-10	3.75622e-10	3.65491e-10	1.43273e-11	0.00507559	0.00741237	1	0.0392003
P53KO C2_AMDH	31.37	31.13	3.60321e-10	4.25536e-10	3.92928e-10	4.61142e-11	0.00494238	0.0149139	0.973756	0.11428
P53KO C3_AMDH	31.52	32.07	3.24739e-10	2.21803e-10	2.73271e-10	7.27866e-11	0.00396782	0.0393855	0.781745	0.20822
P53KO FLCNKO C1_AMDH	30.56	30.26	6.31718e-10	7.77736e-10	7.04727e-10	1.0325e-10	0.0149885	0.158428	2.95306	0.432657
P53KO FLCNKO C2_AMDH	29.28	29.18	1.53406e-09	1.64416e-09	1.58911e-09	7.78557e-11	0.0200238	0.0272444	3.94512	0.193284
P53KO FLCNKO C3_AMDH	29.59	29.72	1.23744e-09	1.13081e-09	1.18412e-09	7.53974e-11	0.019548	0.0270814	3.85137	0.245231
P53KO C1_RAGC	23.99	23.93	6.00192e-08	6.2568e-08	6.12936e-08	1.80225e-09	0.851187	0.932408	1	0.0294035
P53KO C2_RAGC	23.9	23.95	6.38827e-08	6.17066e-08	6.27946e-08	1.53872e-09	0.789852	0.497639	0.927942	0.0227383
P53KO C3_RAGC	23.78	23.87	6.94235e-08	6.5225e-08	6.73243e-08	2.96882e-09	0.977528	1.60646	1.14843	0.0506427
P53KO FLCNKO C1_RAGC	21.82	21.93	2.70101e-07	2.50272e-07	2.60186e-07	1.40209e-08	5.53378	21.5138	6.50126	0.35034
P53KO FLCNKO C2_RAGC	21.71	21.81	2.915e-07	2.71979e-07	2.8174e-07	1.38034e-08	3.5501	4.83027	4.17076	0.204339
P53KO FLCNKO C3_RAGC	22.38	22.35	1.8321e-07	1.87059e-07	1.85135e-07	2.7221e-09	3.05628	0.977728	3.59061	0.052794
P53KO C1_GABA	22.16	21.98	2.13391e-07	2.41747e-07	2.27569e-07	2.00508e-08	3.16026	10.3735	1	0.088109
P53KO C2_GABA	22.14	22.23	2.16369e-07	2.03284e-07	2.09827e-07	9.25279e-09	2.63927	2.99246	0.835144	0.0368276
P53KO C3_GABA	22.21	22.24	2.06122e-07	2.0188e-07	2.04001e-07	2.99949e-09	2.96203	1.62306	0.937276	0.0137811
P53KO FLCNKO C1_GABA	20.67	20.71	5.99391e-07	5.83e-07	5.91196e-07	1.15897e-08	12.5739	17.7833	3.97875	0.0779991
P53KO FLCNKO C2_GABA	21.03	21.3	4.67024e-07	3.87312e-07	4.27168e-07	5.63648e-08	5.38259	19.724	1.70321	0.224739
P53KO FLCNKO C3_GABA	21.32	21.47	3.8198e-07	3.4426e-07	3.6312e-07	2.66723e-08	5.99453	9.58021	1.89685	0.13933
P53KO C1_ARGH	25.65	24.78	1.89924e-08	3.47118e-08	2.68521e-08	1.11152e-08	0.372896	5.75057	1	0.413943
P53KO C2_ARGH	24.14	24.17	5.40924e-08	5.29792e-08	5.35358e-08	7.87155e-10	0.67339	0.254575	1.80584	0.0265519
P53KO C3_ARGH	24.2	24.27	5.18889e-08	4.94313e-08	5.06601e-08	1.73776e-09	0.735569	0.940318	1.97258	0.0676642
P53KO FLCNKO C1_ARGH	23.47	23.47	8.60649e-08	8.60649e-08	8.60649e-08	0	1.83048	0	4.90881	0
P53KO FLCNKO C2_ARGH	23.21	23.22	1.03061e-07	1.02349e-07	1.02705e-07	5.03385e-10	1.29415	0.176152	3.47053	0.01701
P53KO FLCNKO C3_ARGH	24	23.99	5.96046e-08	6.00192e-08	5.98119e-08	2.93155e-10	0.987401	0.105296	2.64792	0.0129782
P53KO C1_TBP	24.32	24.26	4.77475e-08	4.97751e-08	4.87613e-08	1.43375e-09
P53KO C2_TBP	24.26	24.19	4.97751e-08	5.22498e-08	5.10124e-08	1.74984e-09
P53KO C3_TBP	24.24	24.22	5.047e-08	5.11745e-08	5.08222e-08	4.98181e-10
P53KO FLCNKO C1_TBP	24.02	23.94	5.87841e-08	6.21358e-08	6.04599e-08	2.37005e-09
P53KO FLCNKO C2_TBP	24.43	24.34	4.42423e-08	4.70901e-08	4.56662e-08	2.01376e-09
P53KO FLCNKO C3_TBP	24.43	24.32	4.42423e-08	4.77475e-08	4.59949e-08	2.47858e-09
P53KO C1_HPRT	23.19	23.14	1.045e-07	1.08185e-07	1.06342e-07	2.60581e-09
P53KO C2_HPRT	22.9	22.99	1.27765e-07	1.20038e-07	1.23902e-07	5.46374e-09
P53KO C3_HPRT	23.28	23.43	9.81797e-08	8.84845e-08	9.33321e-08	6.85554e-09
P53KO FLCNKO C1_HPRT	24.7	24.71	3.6691e-08	3.64375e-08	3.65642e-08	1.79211e-10
P53KO FLCNKO C2_HPRT	22.82	22.76	1.3505e-07	1.40785e-07	1.37918e-07	4.05527e-09
P53KO FLCNKO C3_HPRT	23.54	23.62	8.19887e-08	7.7566e-08	7.97774e-08	3.12729e-09
Name	Cp	cp	cp	cp1 std	cp1 std	cp1 std	gem	gem std	normalized for HPRT/TBP	normalized for HPRT/TBP std	foldchange	foldchange std
C1 GPNMB	28.71	28.48	28.69	2.27734e-09	2.67095e-09	2.30914e-09	2.41914e-09	2.18649e-10	0.0835745	0.079948	1	0.0903829
C2 GPNMB	30.01	29.81	29.92	9.24889e-10	1.06242e-09	9.84425e-10	9.90578e-10	6.89709e-11	0.027527	0.0876311	0.329371	0.0229331
C3 GPNMB	30.77	31.33	30.61	5.46144e-10	3.70451e-10	6.10199e-10	5.08931e-10	1.24131e-10	0.0137542	0.105321	0.164574	0.0401404
FLCNKOC1 GPNMB	25.37	25.14	25.13	2.30605e-08	2.70462e-08	2.72343e-08	2.57803e-08	2.35731e-09	1.55122	1.21424	18.561	1.69718
FLCNKOC2 GPNMB	22.86	22.79	22.85	1.31357e-07	1.37888e-07	1.32271e-07	1.33839e-07	3.53635e-09	4.21582	1.57308	50.4438	1.33285
FLCNKOC3 GPNMB	22.71	22.59	22.58	1.4575e-07	1.58392e-07	1.59493e-07	1.54545e-07	7.63657e-09	4.67975	3.26078	55.995	2.76689
C1 SQSTM1	22.11	22.03	22.12	2.20916e-07	2.33512e-07	2.1939e-07	2.24606e-07	7.75057e-09	7.75949	2.83396	1	0.0345074
C2 SQSTM1	22.65	22.61	22.71	1.51939e-07	1.56211e-07	1.4575e-07	1.513e-07	5.25971e-09	4.20446	6.68273	0.541848	0.0188365
C3 SQSTM1	22.19	22.3	22.35	2.08999e-07	1.93656e-07	1.87059e-07	1.96572e-07	1.12567e-08	5.31246	9.55091	0.684641	0.0392059
FLCNKOC1 SQSTM1	21.49	21.64	21.58	3.3952e-07	3.05993e-07	3.18987e-07	3.215e-07	1.69044e-08	19.3449	8.70738	2.49306	0.131085
FLCNKOC2 SQSTM1	21.02	20.98	21.05	4.70272e-07	4.83494e-07	4.60594e-07	4.71453e-07	1.14952e-08	14.8504	5.11342	1.91384	0.0466642
FLCNKOC3 SQSTM1	20.63	20.58	20.67	6.16242e-07	6.37974e-07	5.99391e-07	6.17869e-07	1.93428e-08	18.7096	8.2593	2.41118	0.0754839
C1 RRAGD	31.38	30.6	30.79	3.57832e-10	6.14444e-10	5.38625e-10	5.03633e-10	1.31836e-10	0.0173991	0.0482052	1	0.26177
C2 RRAGD	31.54	31.55	31.39	3.20268e-10	3.18056e-10	3.5536e-10	3.31228e-10	2.0928e-11	0.00920446	0.0265901	0.529019	0.0334251
C3 RRAGD	32.52	31.05	32.78	1.6237e-10	4.49799e-10	1.35593e-10	2.49254e-10	1.74193e-10	0.00673624	0.147797	0.38716	0.270569
FLCNKOC1 RRAGD	24.73	24.77	24.87	3.59359e-08	3.49532e-08	3.26125e-08	3.45005e-08	1.70731e-09	2.07592	0.879427	119.312	5.90434
FLCNKOC2 RRAGD	22.81	22.68	22.84	1.3599e-07	1.48813e-07	1.33191e-07	1.39331e-07	8.32961e-09	4.38882	3.70527	252.244	15.0799
FLCNKOC3 RRAGD	24.02	23.9	23.9	5.87841e-08	6.38827e-08	6.38827e-08	6.21831e-08	2.94369e-09	1.88296	1.25694	108.221	5.12311
C1 WIPI1	25.75	25.63	25.72	1.77206e-08	1.92576e-08	1.80929e-08	1.8357e-08	8.01808e-10	0.634182	0.293177	1	0.0436786
C2 WIPI1	25.79	25.77	25.76	1.7236e-08	1.74766e-08	1.75982e-08	1.74369e-08	1.84315e-10	0.484552	0.234181	0.764058	0.00807637
C3 WIPI1	25.42	25.83	25.47	2.2275e-08	1.67647e-08	2.15162e-08	2.01853e-08	2.98654e-09	0.54552	2.53398	0.860194	0.127271
FLCNKOC1 WIPI1	25.39	25.11	24.85	2.2743e-08	2.76145e-08	3.30677e-08	2.78084e-08	5.16509e-09	1.67325	2.66051	2.63844	0.49006
FLCNKOC2 WIPI1	23.26	23.31	23.3	9.95502e-08	9.61592e-08	9.6828e-08	9.75125e-08	1.79615e-09	3.07157	0.798983	4.84335	0.0892131
FLCNKOC3 WIPI1	24.29	24.2	24.21	4.87508e-08	5.18889e-08	5.15304e-08	5.07234e-08	1.71769e-09	1.53594	0.733445	2.42193	0.0820158
C1 Fnip2	25.31	25.31	25.42	2.40398e-08	2.40398e-08	2.2275e-08	2.34515e-08	1.01891e-09	0.810183	0.37256	1	0.0434476
C2 Fnip2	26.1	26.5	26.5	1.39033e-08	1.05367e-08	1.05367e-08	1.16589e-08	1.94369e-09	0.323988	2.46955	0.399894	0.0666674
C3 Fnip2	25.35	25.35	25.4	2.33824e-08	2.33824e-08	2.25859e-08	2.31169e-08	4.59854e-10	0.624749	0.390172	0.77112	0.0153395
FLCNKOC1 Fnip2	24.72	24.7	24.79	3.61858e-08	3.6691e-08	3.4472e-08	3.57829e-08	1.16306e-09	2.15309	0.599085	2.65753	0.086378
FLCNKOC2 Fnip2	22.91	22.99	23.11	1.26883e-07	1.20038e-07	1.10458e-07	1.19126e-07	8.25035e-09	3.75239	3.67001	4.63153	0.320767
FLCNKOC3 Fnip2	23.44	23.42	23.39	8.78733e-08	8.91e-08	9.09721e-08	8.93151e-08	1.56059e-09	2.70454	0.666364	3.33818	0.0583274
C1 HPRT	24.65	24.87	24.66	3.79849e-08	3.26125e-08	3.77225e-08	3.61066e-08	3.02884e-09	1.24738	1.10748	1	0.083886
C2 HPRT	23.97	23.99	24.01	6.08571e-08	6.00192e-08	5.91929e-08	6.00231e-08	8.32076e-10	1.66797	1.0572	1.33718	0.0185368
C3 HPRT	23.93	23.98	23.9	6.2568e-08	6.04367e-08	6.38827e-08	6.22958e-08	1.73904e-09	1.68358	1.47552	1.34969	0.0376779
FLCNKOC1 HPRT	26.21	25.98	26.2	1.28826e-08	1.51092e-08	1.29722e-08	1.36547e-08	1.26044e-09	0.821612	0.649246	0.65867	0.0608006
FLCNKOC2 HPRT	23.85	24	23.92	6.61355e-08	5.96046e-08	6.30032e-08	6.29144e-08	3.26633e-09	1.98176	1.45296	1.58873	0.0824823
FLCNKOC3 HPRT	24.29	24.45	24.75	4.87508e-08	4.36332e-08	3.54411e-08	4.26083e-08	6.71373e-09	1.29022	2.86673	1.03434	0.162979
C1 TBP	25.55	25.28	25.27	2.03556e-08	2.45449e-08	2.47156e-08	2.32054e-08	2.46948e-09	0.80168	0.902951	1	0.106418
C2 TBP	25.5	25.49	25.41	2.10734e-08	2.122e-08	2.24299e-08	2.15745e-08	7.44479e-10	0.59953	0.945898	0.747842	0.0258061
C3 TBP	25.4	25.42	25.5	2.25859e-08	2.2275e-08	2.10734e-08	2.19781e-08	7.98764e-10	0.593972	0.677726	0.740909	0.0269273
FLCNKOC1 TBP	25.52	25.38	25.81	2.07833e-08	2.29012e-08	1.69987e-08	2.02277e-08	2.99022e-09	1.21712	1.54025	1.51821	0.224434
FLCNKOC2 TBP	25.93	25.75	26.02	1.5642e-08	1.77206e-08	1.4696e-08	1.60195e-08	1.54722e-09	0.504603	0.688249	0.629432	0.0607925
FLCNKOC3 TBP	25.17	25.23	25.26	2.64896e-08	2.54105e-08	2.48876e-08	2.55959e-08	8.16938e-10	0.775064	0.348829	0.9668	0.0308572

## Sheet: Fig 3D
Name	Cp	cp	cp1 std	cp1 std	gem	gem std	normalized for HPRT/TBP	normalized for HPRT/TBP std	foldchange	foldchange std
C1siNT_A_TFE3	25.33	25.46	2.37088e-08	2.16659e-08	2.26874e-08	1.44459e-09	0.433342	0.890283	1	0.0636737
C1siTFE3B_A_TFE3	26.98	26.95	7.55459e-09	7.71332e-09	7.63396e-09	1.12245e-10	0.216458	0.108246	0.499508	0.00734444
C2siNT_A_TFE3	24.27	24.01	4.94313e-08	5.91929e-08	5.43121e-08	6.90251e-09	0.728534	3.57049	1	0.12709
C2siTFE3B_A_TFE3	25.41	25.19	2.24299e-08	2.61249e-08	2.42774e-08	2.61273e-09	0.198601	0.363607	0.272603	0.0293375
C3siNT_A_TFE3	24.58	24.58	3.98733e-08	3.98733e-08	3.98733e-08	0	0.814989	0	1	0
C3siTFE3B_A_TFE3	26.4	26.28	1.1293e-08	1.22725e-08	1.17827e-08	6.92607e-10	0.3203	0.350872	0.393011	0.0231018
C1siNT_A_FNIP2	24.61	24.51	3.90528e-08	4.18557e-08	4.04542e-08	1.98199e-09	0.7727	1.22147	1	0.0489933
C1siTFE3B_A_FNIP2	25.67	25.69	1.8731e-08	1.84731e-08	1.8602e-08	1.82345e-10	0.527453	0.175849	0.68261	0.00669123
C2siNT_A_FNIP2	22.35	22.29	1.87059e-07	1.95003e-07	1.91031e-07	5.61699e-09	2.56246	2.90552	1	0.0294035
C2siTFE3B_A_FNIP2	22.35	22.28	1.87059e-07	1.96359e-07	1.91709e-07	6.57607e-09	1.56827	0.915174	0.612018	0.0209936
C3siNT_A_FNIP2	22.66	22.64	1.5089e-07	1.52996e-07	1.51943e-07	1.48941e-09	3.10563	1.60383	1	0.00980242
C3siTFE3B_A_FNIP2	22.99	22.98	1.20038e-07	1.20873e-07	1.20456e-07	5.90387e-10	3.27446	0.299088	1.05436	0.00516771
C1siNT_A_GPNMB	24.2	24.06	5.18889e-08	5.71766e-08	5.45327e-08	3.739e-09	1.04161	2.3043	1	0.0685643
C1siTFE3B_A_GPNMB	27.13	26.96	6.80857e-09	7.66004e-09	7.23431e-09	6.0208e-10	0.205126	0.580632	0.196932	0.0163898
C2siNT_A_GPNMB	21.68	21.64	2.97625e-07	3.05993e-07	3.01809e-07	5.91663e-09	4.04841	3.06052	1	0.0196039
C2siTFE3B_A_GPNMB	22.22	22.12	2.04698e-07	2.1939e-07	2.12044e-07	1.03887e-08	1.73462	1.44577	0.428469	0.0209921
C3siNT_A_GPNMB	21.25	21.16	4.00971e-07	4.26781e-07	4.13876e-07	1.82508e-08	8.45939	19.6528	1	0.0440973
C3siTFE3B_A_GPNMB	22.82	22.9	1.3505e-07	1.27765e-07	1.31408e-07	5.15122e-09	3.57218	2.60959	0.422273	0.0165532
C1siNT_A_RRAGD	23.6	23.75	7.86488e-08	7.08823e-08	7.47655e-08	5.49177e-09	1.42807	3.38451	1	0.0734532
C1siTFE3B_A_RRAGD	26.33	26.3	1.18544e-08	1.21035e-08	1.1979e-08	1.76131e-10	0.339659	0.169856	0.237845	0.00349712
C2siNT_A_RRAGD	21.79	21.85	2.75776e-07	2.64542e-07	2.70159e-07	7.94362e-09	3.62387	4.10902	1	0.0294035
C2siTFE3B_A_RRAGD	21.82	21.75	2.70101e-07	2.83529e-07	2.76815e-07	9.49539e-09	2.26448	1.32145	0.624878	0.0214348
C3siNT_A_RRAGD	23.23	23.16	1.01642e-07	1.06695e-07	1.04169e-07	3.57322e-09	2.12915	3.84772	1	0.0343023
C3siTFE3B_A_RRAGD	24.99	24.98	3.00096e-08	3.02183e-08	3.0114e-08	1.47597e-10	0.818615	0.0747719	0.38448	0.00188444
C1siNT_A_SQSTM1	21.16	21.15	4.26781e-07	4.2975e-07	4.28265e-07	2.09905e-09	8.18013	1.29362	1	0.00490127
C1siTFE3B_A_SQSTM1	22.31	22.62	1.92318e-07	1.55132e-07	1.73725e-07	2.62947e-08	4.92591	25.358	0.60218	0.0911448
C2siNT_A_SQSTM1	21.48	21.45	3.41882e-07	3.49065e-07	3.45473e-07	5.07961e-09	4.63412	2.62755	1	0.0147033
C2siTFE3B_A_SQSTM1	21.62	21.55	3.10264e-07	3.25689e-07	3.17977e-07	1.09073e-08	2.6012	1.51794	0.561314	0.0192544
C3siNT_A_SQSTM1	20.64	20.77	6.11985e-07	5.59251e-07	5.85618e-07	3.72885e-08	11.9697	40.1529	1	0.0636737
C3siTFE3B_A_SQSTM1	21.33	21.35	3.79341e-07	3.74119e-07	3.7673e-07	3.69287e-09	10.241	1.87079	0.855575	0.00838671
C1siNT_A_RRAGC	22.28	22.29	1.96359e-07	1.95003e-07	1.95681e-07	9.59087e-10	3.73763	0.591074	1	0.00490127
C1siTFE3B_A_RRAGC	23.62	23.57	7.7566e-08	8.03014e-08	7.89337e-08	1.93419e-09	2.23813	1.86529	0.598811	0.0146733
C2siNT_A_RRAGC	22.15	22.15	2.14875e-07	2.14875e-07	2.14875e-07	0	2.8823	0	1	0
C2siTFE3B_A_RRAGC	21.99	21.93	2.40077e-07	2.50272e-07	2.45174e-07	7.20899e-09	2.00564	1.00325	0.695849	0.0204604
C3siNT_A_RRAGC	22.62	22.5	1.55132e-07	1.68587e-07	1.6186e-07	9.51437e-09	3.30832	10.2453	1	0.0587816
C3siTFE3B_A_RRAGC	23.39	23.52	9.09721e-08	8.31332e-08	8.70527e-08	5.54297e-09	2.36643	2.80804	0.715296	0.0455455
C1siNT_A_GABARAP	21.4	21.32	3.61375e-07	3.8198e-07	3.71677e-07	1.45699e-08	7.09926	8.97923	1	0.0392003
C1siTFE3B_A_GABARAP	21.93	21.58	2.50272e-07	3.18987e-07	2.84629e-07	4.85887e-08	8.07055	46.8578	1.13682	0.194064
C2siNT_A_GABARAP	21.85	21.67	2.64542e-07	2.99695e-07	2.82119e-07	2.48572e-08	3.78429	12.858	1	0.088109
C2siTFE3B_A_GABARAP	21.41	21.31	3.58879e-07	3.84637e-07	3.71758e-07	1.82136e-08	3.04115	2.53474	0.803625	0.0393723
C3siNT_A_GABARAP	21.18	21.25	4.20906e-07	4.00971e-07	4.10938e-07	1.40961e-08	8.39935	15.179	1	0.0343023
C3siTFE3B_A_GABARAP	21.68	21.52	2.97625e-07	3.32533e-07	3.15079e-07	2.46834e-08	8.56507	12.5045	1.01973	0.0798861
C1siNT_A_ARHGAP12	24	23.97	5.96046e-08	6.08571e-08	6.02309e-08	8.85595e-10	1.15045	0.545782	1	0.0147033
C1siTFE3B_A_ARHGAP12	24.22	24.27	5.11745e-08	4.94313e-08	5.03029e-08	1.23262e-09	1.42632	1.18871	1.2398	0.03038
C2siNT_A_ARHGAP12	23.73	23.79	7.18717e-08	6.8944e-08	7.04079e-08	2.07024e-09	0.94444	1.07088	1	0.0294035
C2siTFE3B_A_ARHGAP12	23.55	23.46	8.14223e-08	8.66635e-08	8.40429e-08	3.70607e-09	0.687511	0.515763	0.727956	0.0321009
C3siNT_A_ARHGAP12	23.98	23.88	6.04367e-08	6.47744e-08	6.26056e-08	3.06725e-09	1.27962	3.30288	1	0.0489933
C3siTFE3B_A_ARHGAP12	24.57	24.6	4.01507e-08	3.93244e-08	3.97375e-08	5.84275e-10	1.08022	0.295991	0.844171	0.0124121
C1siNT_A_AMDHD2	30.86	30.51	5.13115e-10	6.53996e-10	5.83555e-10	9.96179e-11	0.0111463	0.0613934	1	0.170709
C1siTFE3B_A_AMDHD2	32.82	32.81	1.31885e-10	1.32802e-10	1.32344e-10	6.48652e-13	0.00375255	0.000625545	0.336665	0.00165009
C2siNT_A_AMDHD2	30.62	30.72	6.05985e-10	5.65404e-10	5.85694e-10	2.86951e-11	0.0078564	0.0148432	1	0.0489933
C2siTFE3B_A_AMDHD2	31.34	31.13	3.67892e-10	4.25536e-10	3.96714e-10	4.07607e-11	0.00324531	0.00567255	0.413078	0.042442
C3siNT_A_AMDHD2	30.59	30.46	6.18718e-10	6.77059e-10	6.47888e-10	4.12534e-11	0.0132425	0.0444225	1	0.0636737
C3siTFE3B_A_AMDHD2	32.71	32.74	1.42334e-10	1.39405e-10	1.40869e-10	2.07125e-12	0.00382938	0.00104929	0.289174	0.00425182
C1siNT_A_WIPI1	23.48	23.36	8.54704e-08	9.28837e-08	8.9177e-08	5.24197e-09	1.70333	3.23056	1	0.0587816
C1siTFE3B_A_WIPI1	23.97	24	6.08571e-08	5.96046e-08	6.02309e-08	8.85595e-10	1.70782	0.854046	1.00263	0.0147421
C2siNT_A_WIPI1	22.31	22.5	1.92318e-07	1.68587e-07	1.80453e-07	1.67803e-08	2.42057	8.68002	1	0.0929902
C2siTFE3B_A_WIPI1	22.16	22.12	2.13391e-07	2.1939e-07	2.1639e-07	4.24209e-09	1.77017	0.59036	0.731306	0.0143365
C3siNT_A_WIPI1	22.94	22.9	1.24272e-07	1.27765e-07	1.26018e-07	2.47045e-09	2.57575	2.66023	1	0.0196039
C3siTFE3B_A_WIPI1	23.75	23.66	7.08823e-08	7.5445e-08	7.31636e-08	3.22632e-09	1.98887	1.63444	0.772153	0.0340499
C1siNT_A_TFEB	31.43	31.76	3.45643e-10	2.74971e-10	3.10307e-10	4.99722e-11	0.00592705	0.0307972	1	0.161041
C1siTFE3B_A_TFEB	33.85	33.88	6.45854e-11	6.32563e-11	6.39209e-11	9.3985e-13	0.00181245	0.000906369	0.305793	0.00449618
C2siNT_A_TFEB	32.43	32.52	1.72821e-10	1.6237e-10	1.67595e-10	7.39051e-12	0.0022481	0.00382291	1	0.0440973
C2siTFE3B_A_TFEB	33.34	33.1	9.19729e-11	1.08619e-10	1.00296e-10	1.17708e-11	0.00082047	0.00163811	0.364962	0.0428321
C3siNT_A_TFEB	32.15	32.08	2.09839e-10	2.20271e-10	2.15055e-10	7.37688e-12	0.0043956	0.00794356	1	0.0343023
C3siTFE3B_A_TFEB	34.73	33.95	3.50936e-11	6.02603e-11	4.7677e-11	1.77956e-11	0.00129605	0.00901516	0.29485	0.110054
C1siNT_A_TBP	24.08	24.03	5.63894e-08	5.8378e-08	5.73837e-08	1.40613e-09
C1siTFE3B_A_TBP	24.7	24.61	3.6691e-08	3.90528e-08	3.78719e-08	1.67005e-09
C2siNT_A_TBP	24.5	24.46	4.21468e-08	4.33318e-08	4.27393e-08	8.37857e-10
C2siTFE3B_A_TBP	24.02	23.9	5.87841e-08	6.38827e-08	6.13334e-08	3.60527e-09
C3siNT_A_TBP	24.46	24.43	4.33318e-08	4.42423e-08	4.3787e-08	6.43815e-10
C3siTFE3B_A_TBP	24.82	24.97	3.37626e-08	3.04285e-08	3.20956e-08	2.35752e-09
C1siNT_A_HPRT	24.36	24.28	4.64418e-08	4.90899e-08	4.77658e-08	1.87243e-09
C1siTFE3B_A_HPRT	24.84	24.88	3.32978e-08	3.23872e-08	3.28425e-08	6.43841e-10
C2siNT_A_HPRT	22.84	22.91	1.33191e-07	1.26883e-07	1.30037e-07	4.46057e-09
C2siTFE3B_A_HPRT	21.91	22.03	2.53766e-07	2.33512e-07	2.43639e-07	1.43215e-08
C3siNT_A_HPRT	24.1	24.15	5.56131e-08	5.37187e-08	5.46659e-08	1.33953e-09
C3siTFE3B_A_HPRT	24.54	24.46	4.09943e-08	4.33318e-08	4.2163e-08	1.6528e-09
C3siTFE3_72hr_HPRT	23.48	23.63	8.54704e-08	7.70302e-08	8.12503e-08	5.9681e-09
C3siTFE3/B_72hr_HPRT	23.75	23.88	7.08823e-08	6.47744e-08	6.78284e-08	4.31888e-09

## Sheet: Fig 3 - supplemental 1C
	Cp	cp	cp1 std	cp1 std	gem	gem std	normalized for HPRT/TBP	normalized for HPRT/TBP std	foldchange	foldchange std
C1siNT_72hr_TFE3	25.88	25.9	1.61936e-08	1.59707e-08	1.60821e-08	1.57644e-10	0.470575	#NUM!	1	0.00980242
C1siTFE3_72hr_TFE3	27.76	27.43	4.39954e-09	5.53028e-09	4.96491e-09	7.99554e-10	0.123385	0.499174	0.2622	0.042225
C2siNT_72hr_TFE3	24.78	24.7	3.47118e-08	3.6691e-08	3.57014e-08	1.3995e-09	0.702387	2.12349	1	0.0392003
C2siTFE3_72hr_TFE3	25.9	25.72	1.59707e-08	1.80929e-08	1.70318e-08	1.50065e-09	0.346897	1.27306	0.493883	0.0435156
C3siNT_72hr_TFE3	25.93	25.88	1.5642e-08	1.61936e-08	1.59178e-08	3.9005e-10	0.378138	0.244145	1	0.024504
C3siTFE3_72hr_TFE3	26.86	26.74	8.20983e-09	8.92191e-09	8.56587e-09	5.03516e-10	0.155036	0.1025	0.409999	0.0241004
C1siNT_72hr_Fnip2	25.53	25.43	2.06397e-08	2.21211e-08	2.13804e-08	1.0475e-09	0.531332	#NUM!	1	0.0489933
C1siTFE3_72hr_Fnip2	25.52	25.37	2.07833e-08	2.30605e-08	2.19219e-08	1.61023e-09	0.560247	1.00529	1.05442	0.0774505
C2siNT_72hr_Fnip2	23.29	23.3	9.75015e-08	9.6828e-08	9.71648e-08	4.76231e-10	1.97902	0.722592	1	0.00490127
C2siTFE3_72hr_Fnip2	23.97	23.85	6.08571e-08	6.61355e-08	6.34963e-08	3.73241e-09	1.13565	3.16635	0.573846	0.0337316
C3siNT_72hr_Fnip2	24.12	24.06	5.48475e-08	5.71766e-08	5.6012e-08	1.64695e-09	1.01378	1.03088	1	0.0294035
C3siTFE3_72hr_Fnip2	24.09	24.14	5.59999e-08	5.40924e-08	5.50461e-08	1.34885e-09	1.61069	0.274583	1.5888	0.0389319
C1siNT_72hr_GPNMB	25.07	24.93	2.83908e-08	3.1284e-08	2.98374e-08	2.04578e-09	0.762539	#NUM!	1	0.0685643
C1siTFE3_72hr_GPNMB	26.9	26.92	7.98533e-09	7.8754e-09	7.93037e-09	7.77368e-11	0.156022	0.0485323	0.204608	0.00200565
														HPRT gem	HPRT gem std
C2siNT_72hr_GPNMB	22.73	22.57	1.43743e-07	1.60603e-07	1.52173e-07	1.19213e-08	2.72166	18.0884	1	0.0783404			C1siNT_72hr_HPRT	3.41755e-08	#NUM!
C2siTFE3_72hr_GPNMB	23.64	23.67	7.64981e-08	7.49238e-08	7.5711e-08	1.1132e-09	1.79856	0.944375	0.660833	0.00971646			C1siTFE3_72hr_HPRT	4.02393e-08	1.60176e-09
C3siNT_72hr_GPNMB	23.09	23.2	1.12e-07	1.03778e-07	1.07889e-07	5.81392e-09	3.1569	3.63913	1	0.0538881			C2siNT_72hr_HPRT	5.08286e-08	6.59059e-10
C3siTFE3_72hr_GPNMB	23.72	23.64	7.23717e-08	7.64981e-08	7.44349e-08	2.91787e-09	1.84981	0.593986	0.585956	0.0229697			C2siTFE3_72hr_HPRT	4.90975e-08	1.17877e-09
C1siNT_72hr_RRAGD	24.21	24.43	5.15304e-08	4.42423e-08	4.78863e-08	5.15352e-09	0.942114	#NUM!	1	0.10762			C3siNT_72hr_HPRT	4.20952e-08	1.59761e-09
C1siTFE3_72hr_RRAGD	25.3	25.15	2.4207e-08	2.68594e-08	2.55332e-08	1.87549e-09	0.52005	1.1709	0.552004	0.0405465			C3siTFE3_72hr_HPRT	5.52507e-08	4.91236e-09
C2siNT_72hr_RRAGD	21.94	21.69	2.48543e-07	2.95569e-07	2.72056e-07	3.32525e-08	6.46288	50.4545	1	0.122227
C2siTFE3_72hr_RRAGD	22.66	22.57	1.5089e-07	1.60603e-07	1.55746e-07	6.868e-09	2.8189	5.82639	0.436168	0.0192338
C3siNT_72hr_RRAGD	23.7	24.39	7.33819e-08	4.54861e-08	5.9434e-08	1.97253e-08	1.47701	12.3467	1	0.331887
C3siTFE3_72hr_RRAGD	24.33	24.49	4.74177e-08	4.244e-08	4.49288e-08	3.51974e-09	1.14822	0.716508	0.777395	0.0609014
C1siNT_72hr_SQSTM1	21.64	21.73	3.05993e-07	2.87487e-07	2.9674e-07	1.30854e-08	6.04389	#NUM!	1	0.0440973
C1siTFE3_72hr_SQSTM1	22.06	22.01	2.28706e-07	2.36772e-07	2.32739e-07	5.70304e-09	4.16261	3.56049	0.68873	0.0168766
C2siNT_72hr_SQSTM1	21.57	21.48	3.21206e-07	3.41882e-07	3.31544e-07	1.46202e-08	6.00071	22.1834	1	0.0440973
C2siTFE3_72hr_SQSTM1	22.13	22.19	2.17874e-07	2.08999e-07	2.13437e-07	6.27579e-09	6.24531	5.324	1.04076	0.0306021
C3siNT_72hr_SQSTM1	21.9	21.6	2.55531e-07	3.14595e-07	2.85063e-07	4.17649e-08	7.28521	26.142	1	0.146511
C3siTFE3_72hr_SQSTM1	20.99	20.98	4.80154e-07	4.83494e-07	4.81824e-07	2.36155e-09	9.47938	0.480736	1.30118	0.00637744
C1siNT_72hr_RRAGC	22.55	22.55	1.62845e-07	1.62845e-07	1.62845e-07	0	2.91252	#NUM!	1	0
C1siTFE3_72hr_RRAGC	23	23.19	1.19209e-07	1.045e-07	1.11854e-07	1.04014e-08	2.65718	6.49372	0.912327	0.0848374
C2siNT_72hr_RRAGC	22.19	22.13	2.08999e-07	2.17874e-07	2.13437e-07	6.27579e-09	6.24531	9.52234	1	0.0294035
C2siTFE3_72hr_RRAGC	22.74	22.75	1.42751e-07	1.41765e-07	1.42258e-07	6.97243e-10	3.53529	0.591499	0.566071	0.00277447
C3siNT_72hr_RRAGC	22.92	22.92	1.26006e-07	1.26006e-07	1.26006e-07	0	2.47904	0	1	0
C3siTFE3_72hr_RRAGC	23.08	23.15	1.12779e-07	1.07437e-07	1.10108e-07	3.77696e-09	2.24264	0.76887	0.90464	0.0310312
C1siNT_72hr_GABARAP	22.27	21.96	1.97725e-07	2.45121e-07	2.21423e-07	3.35142e-08	5.26006	#NUM!	1	0.151358
C1siTFE3_72hr_GABARAP	21.97	21.81	2.43428e-07	2.71979e-07	2.57704e-07	2.01886e-08	4.66426	12.6041	0.886732	0.0694669
C2siNT_72hr_GABARAP	21.99	22.01	2.40077e-07	2.36772e-07	2.38424e-07	2.33714e-09	5.92516	3.54617	1	0.00980242
C2siTFE3_72hr_GABARAP	22.3	22.3	1.93656e-07	1.93656e-07	1.93656e-07	0	4.94917	0	0.83528	0
C3siNT_72hr_GABARAP	22.08	22	2.25558e-07	2.38419e-07	2.31988e-07	9.094e-09	4.72505	5.69224	1	0.0392003
C3siTFE3_72hr_GABARAP	22.11	22.02	2.20916e-07	2.35136e-07	2.28026e-07	1.00553e-08	4.07831	2.04695	0.863126	0.0380615
C1siNT_72hr_ARHGAP12	25.63	25.73	1.92576e-08	1.79679e-08	1.86127e-08	9.119e-10	0.336878	#NUM!	1	0.0489933
C1siTFE3_72hr_ARHGAP12	24.87	24.96	3.26125e-08	3.06402e-08	3.16263e-08	1.39464e-09	0.925409	0.870692	2.74702	0.121136
C2siNT_72hr_ARHGAP12	24.35	24.26	4.67649e-08	4.97751e-08	4.827e-08	2.12858e-09	1.23361	3.22972	1	0.0440973
C2siTFE3_72hr_ARHGAP12	24.81	24.71	3.39974e-08	3.64375e-08	3.52175e-08	1.72542e-09	0.692867	1.46374	0.561657	0.0275174
C3siNT_72hr_ARHGAP12	24.73	24.9	3.59359e-08	3.19413e-08	3.39386e-08	2.82456e-09	0.607002	1.76799	1	0.0832257
C3siTFE3_72hr_ARHGAP12	24.84	24.8	3.32978e-08	3.42339e-08	3.37658e-08	6.61942e-10	0.802129	0.13475	1.32146	0.0259058
C1siNT_72hr_AMDHD2	29.91	29.85	9.91272e-10	1.03337e-09	1.01232e-09	2.97657e-11	0.0296212	#NUM!	1	0.0294035
C1siTFE3_72hr_AMDHD2	30.94	31.37	4.85436e-10	3.60321e-10	4.22878e-10	8.84699e-11	0.0105091	0.0552331	0.354783	0.0742238
C2siNT_72hr_AMDHD2	29.85	29.63	1.03337e-09	1.2036e-09	1.11848e-09	1.20371e-10	0.022005	0.182641	1	0.10762
C2siTFE3_72hr_AMDHD2	31.4	31.75	3.52905e-10	2.76884e-10	3.14895e-10	5.37553e-11	0.00641366	0.0456027	0.291464	0.0497555
C3siNT_72hr_AMDHD2	30.05	29.99	8.99598e-10	9.378e-10	9.18699e-10	2.7013e-11	0.0218243	0.0169083	1	0.0294035
C3siTFE3_72hr_AMDHD2	31.42	31.64	3.48047e-10	2.98821e-10	3.23434e-10	3.48079e-11	0.00585393	0.00708579	0.26823	0.0288669
C1siNT_72hr_WIPI1	24.02	23.95	5.87841e-08	6.17066e-08	6.02453e-08	2.06655e-09	1.76282	#NUM!	1	0.0343023
C1siTFE3_72hr_WIPI1	24.41	24.51	4.48598e-08	4.18557e-08	4.33578e-08	2.12424e-09	1.0775	1.3262	0.611236	0.0299464
C2siNT_72hr_WIPI1	22.49	22.46	1.6976e-07	1.73327e-07	1.71544e-07	2.52226e-09	3.37494	3.82707	1	0.0147033
C2siTFE3_72hr_WIPI1	23.01	22.95	1.18386e-07	1.23413e-07	1.209e-07	3.55487e-09	2.46244	3.01574	0.729624	0.0214535
C3siNT_72hr_WIPI1	23.23	23.23	1.01642e-07	1.01642e-07	1.01642e-07	0	2.41457	0	1	0
C3siTFE3_72hr_WIPI1	23.34	23.19	9.41803e-08	1.045e-07	9.93399e-08	7.29683e-09	1.79798	1.4854	0.744638	0.0546961
C1siNT_72hr_TBP	24.65	24.68	3.79849e-08	3.72031e-08	3.7594e-08	5.52758e-10
C1siTFE3_72hr_TBP	24.62	24.56	3.8783e-08	4.043e-08	3.96065e-08	1.16457e-09
C2siNT_72hr_TBP	25.02	25.03	2.9392e-08	2.9189e-08	2.92905e-08	1.43561e-10
C2siTFE3_72hr_TBP	25.1	25.16	2.78066e-08	2.66738e-08	2.72402e-08	8.00957e-10
C3siNT_72hr_TBP	24.85	24.92	3.30677e-08	3.15016e-08	3.22847e-08	1.10744e-09
C3siTFE3_72hr_TBP	24.78	24.56	3.47118e-08	4.043e-08	3.75709e-08	4.04337e-09
C1siNT_72hr_HPRT	24.94	24.94	3.10679e-08	3.10679e-08	3.10679e-08	0
C1siTFE3_72hr_HPRT	24.49	24.6	4.244e-08	3.93244e-08	4.08822e-08	2.20306e-09
C2siNT_72hr_HPRT	23.4	23.47	9.03437e-08	8.60649e-08	8.82043e-08	3.02561e-09
C2siTFE3_72hr_HPRT	23.41	23.45	8.97197e-08	8.72663e-08	8.8493e-08	1.73481e-09
C3siNT_72hr_HPRT	23.93	23.98	6.2568e-08	6.04367e-08	6.15023e-08	1.50705e-09
C3siTFE3_72hr_HPRT	23.48	23.63	8.54704e-08	7.70302e-08	8.12503e-08	5.9681e-09
