# Supplementary material for: Loss of FLCN-FNIP1/2 induces a non-canonical interferon response in human renal tubular epithelial cells
Source: eLife. 2021 Jan 18;10:e61630. doi: 10.7554/eLife.61630 (PMC7899648; doi:10.7554/eLife.61630)
Supplement: Figure 6—figure supplement 1—source data 1. [file elife-61630-fig6-figsupp1-data1.xlsx]

## Sheet: 6 - supplemental 1C
Name	Cp	cp	cp	cp1 std	cp1 std	cp1 std	gem	gem std	normalized for HPRT/TBP	normalized for HPRT/TBP std	foldchange	foldchange std
C1 GPNMB	28.82	29.46	28.95	2.11016e-09	1.35412e-09	1.92833e-09	1.79754e-09	3.94627e-10	0.055204	0.0467352	1	0.219538
C2 GPNMB	30.55	30.6	30.49	6.36112e-10	6.14444e-10	6.63125e-10	6.37894e-10	2.43895e-11	0.0192176	0.00630749	0.34812	0.0133102
C3 GPNMB	31.78	31.59	31.44	2.71186e-10	3.09359e-10	3.43255e-10	3.07933e-10	3.60558e-11	0.0108198	0.0221591	0.195996	0.0229491
FLCN KO C1 GPNMB	25.73	25.76	25.73	1.79679e-08	1.75982e-08	1.79679e-08	1.78447e-08	2.1349e-10	1.03205	0.176084	18.6952	0.223666
FLCN KO C2 GPNMB	23.33	23.21	23.29	9.48353e-08	1.03061e-07	9.75015e-08	9.84659e-08	4.19671e-09	2.81604	2.58301	51.0115	2.17416
FLCN KO C3 GPNMB	23.13	23.05	22.94	1.08937e-07	1.15149e-07	1.24272e-07	1.16119e-07	7.71314e-09	3.29051	5.63729	59.6062	3.9593
C1 SQSTM1	22.65	22.47	22.65	1.51939e-07	1.7213e-07	1.51939e-07	1.5867e-07	1.16569e-08	4.87289	1.38051	1	0.0734664
C2 SQSTM1	23.24	23.32	23.25	1.0094e-07	9.5495e-08	1.00243e-07	9.88925e-08	2.96294e-09	2.97931	0.766261	0.611404	0.0183184
C3 SQSTM1	22.94	22.89	22.93	1.24272e-07	1.28654e-07	1.25136e-07	1.26021e-07	2.32126e-09	4.42795	1.42659	0.90869	0.0167378
FLCN KO C1 SQSTM1	22.06	22.19	22.11	2.28706e-07	2.08999e-07	2.20916e-07	2.1954e-07	9.92538e-09	12.6972	8.18636	2.60568	0.117802
FLCN KO C2 SQSTM1	21.67	21.5	21.68	2.99695e-07	3.37175e-07	2.97625e-07	3.11498e-07	2.22604e-08	8.90859	13.701	1.82819	0.130647
FLCN KO C3 SQSTM1	21.06	21.09	20.97	4.57413e-07	4.47999e-07	4.86857e-07	4.6409e-07	2.02708e-08	13.1511	14.8153	2.69882	0.117881
C1 STAT1	24.82	24.81	24.93	3.37626e-08	3.39974e-08	3.1284e-08	3.30147e-08	1.50339e-09	1.01391	0.178044	1	0.0455371
C2 STAT1	24.77	24.86	24.82	3.49532e-08	3.28393e-08	3.37626e-08	3.38517e-08	1.05975e-09	1.01984	0.274068	1.00585	0.0314888
C3 STAT1	24.92	24.93	25.03	3.15016e-08	3.1284e-08	2.9189e-08	3.06582e-08	1.277e-09	1.07723	0.784817	1.06245	0.0442541
FLCN KO C1 STAT1	21.44	21.5	21.54	3.51493e-07	3.37175e-07	3.27955e-07	3.38874e-07	1.18609e-08	19.5989	9.78275	19.33	0.676567
FLCN KO C2 STAT1	22.67	22.84	22.87	1.49848e-07	1.33191e-07	1.3045e-07	1.3783e-07	1.04978e-08	3.94181	6.46126	3.88772	0.29611
FLCN KO C3 STAT1	22.86	22.89	22.97	1.31357e-07	1.28654e-07	1.21714e-07	1.27242e-07	4.97429e-09	3.60569	3.63555	3.55622	0.139024
C1 RRagd	31.89	30.46	30.4	2.51277e-10	6.77059e-10	7.05811e-10	5.44716e-10	2.54531e-10	0.0167287	0.0301438	1	0.467274
C2 RRAGD	31.05	30.95	31.49	4.49799e-10	4.82083e-10	3.31563e-10	4.21148e-10	7.92449e-11	0.0126878	0.0204939	0.758444	0.142712
C3 RRAGD	31.09	31.17	32.71	4.37499e-10	4.139e-10	1.42334e-10	3.31244e-10	1.64026e-10	0.0116388	0.100807	0.69574	0.344518
FLCN KO C1 RRAGD	24.99	24.79	24.66	3.00096e-08	3.4472e-08	3.77225e-08	3.4068e-08	3.87227e-09	1.97034	3.19381	117.782	13.3874
FLCN KO C2 RRAGD	22.83	22.7	22.67	1.34117e-07	1.46764e-07	1.49848e-07	1.43576e-07	8.33549e-09	4.10616	5.13037	245.456	14.2502
FLCN KO C3 RRAGD	24.12	23.96	23.96	5.48475e-08	6.12804e-08	6.12804e-08	5.91361e-08	3.71404e-09	1.67576	2.71447	100.172	6.29132
C1 IFIT1	26.98	26.95	27.24	7.55459e-09	7.71332e-09	6.30874e-09	7.19222e-09	7.69217e-10	0.22088	0.0910973	1	0.106951
C2 IFIT1	27.53	27.65	27.64	5.15993e-09	4.74811e-09	4.78113e-09	4.89639e-09	2.28831e-10	0.147512	0.0591792	0.667839	0.0312112
C3 IFIT1	27.05	27.37	27.3	7.19679e-09	5.76513e-09	6.05175e-09	6.33789e-09	7.57507e-10	0.222693	0.465546	1.00821	0.120501
FLCN KO C1 IFIT1	26.17	26.41	26.36	1.32448e-08	1.1215e-08	1.16105e-08	1.20234e-08	1.07608e-09	0.695378	0.887538	3.14822	0.281761
FLCN KO C2 IFIT1	25.98	25.96	25.91	1.51092e-08	1.53201e-08	1.58604e-08	1.54299e-08	3.87435e-10	0.441281	0.23846	1.99783	0.0501645
FLCN KO C3 IFIT1	26.7	26.7	26.71	9.17274e-09	9.17274e-09	9.10938e-09	9.15162e-09	3.65813e-11	0.259332	0.0267361	1.17409	0.00469313
C1 ISG15	26.19	26.08	25.98	1.30624e-08	1.40974e-08	1.51092e-08	1.40897e-08	1.02339e-09	0.432707	0.121198	1	0.0726339
C2 ISG15	26.31	26.03	26.01	1.20199e-08	1.45945e-08	1.47982e-08	1.38042e-08	1.54861e-09	0.415875	0.400495	0.961102	0.10782
C3 ISG15	26.92	26.46	26.48	7.8754e-09	1.08329e-08	1.06838e-08	9.79738e-09	1.66615e-09	0.344248	1.02398	0.795569	0.135295
FLCN KO C1 ISG15	26.62	26.53	26.41	9.69575e-09	1.03199e-08	1.1215e-08	1.04102e-08	7.63622e-10	0.602077	0.629828	1.39142	0.102065
FLCN KO C2 ISG15	24.9	24.83	24.74	3.19413e-08	3.35294e-08	3.56876e-08	3.37194e-08	1.88037e-09	0.964347	1.15734	2.22864	0.124281
FLCN KO C3 ISG15	25.59	25.28	25.32	1.9799e-08	2.45449e-08	2.38737e-08	2.27392e-08	2.56835e-09	0.644368	1.87712	1.48916	0.168197
C1 CTSD	20.91	20.85	20.96	5.07531e-07	5.29084e-07	4.90243e-07	5.08953e-07	1.94595e-08	15.6304	2.30456	1	0.0382344
C2 CTSD	21.83	21.61	21.65	2.68235e-07	3.12422e-07	3.03879e-07	2.94845e-07	2.34379e-08	8.88272	6.06139	0.568297	0.0451751
C3 CTSD	21.85	21.87	21.74	2.64542e-07	2.609e-07	2.85501e-07	2.70314e-07	1.32776e-08	9.49797	8.16012	0.607659	0.0298477
FLCN KO C1 CTSD	20.98	21.02	21.06	4.83494e-07	4.70272e-07	4.57413e-07	4.70393e-07	1.30408e-08	27.2053	10.7559	1.74054	0.0482533
FLCN KO C2 CTSD	19.84	19.84	19.87	1.06553e-06	1.06553e-06	1.0436e-06	1.05822e-06	1.26603e-08	30.2642	7.79221	1.93623	0.0231647
FLCN KO C3 CTSD	19.96	19.91	19.83	9.80486e-07	1.01506e-06	1.07294e-06	1.02283e-06	4.67136e-08	28.9842	34.1415	1.85435	0.0846899
C1 MX1	30.5	30.49	30.27	6.58545e-10	6.63125e-10	7.72364e-10	6.98011e-10	6.44322e-11	0.0214366	0.00763061	1	0.0923082
C2 MX1	29.64	29.96	29.94	1.19528e-09	9.57506e-10	9.70872e-10	1.04122e-09	1.3359e-10	0.0313685	0.0345484	1.46332	0.187746
C3 MX1	31.74	31.84	31.46	2.7881e-10	2.60139e-10	3.38529e-10	2.92493e-10	4.09474e-11	0.0102772	0.0251653	0.479425	0.0671169
FLCN KO C1 MX1	27.74	27.77	27.91	4.46096e-09	4.36915e-09	3.96509e-09	4.26506e-09	2.63812e-10	0.246672	0.21759	11.507	0.711757
FLCN KO C2 MX1	28.38	28.42	28.38	2.86265e-09	2.78437e-09	2.86265e-09	2.83656e-09	4.51946e-11	0.0811232	0.0278166	3.78433	0.0602954
FLCN KO C3 MX1	28.97	28.97	28.93	1.90178e-09	1.90178e-09	1.95525e-09	1.91961e-09	3.08688e-11	0.0543965	0.0225611	2.53755	0.040806
C1 FNIP2	25.4	25.46	25.38	2.25859e-08	2.16659e-08	2.29012e-08	2.23843e-08	6.41871e-10	0.687445	0.0760159	1	0.028675
C2 FNIP2	26.23	26.27	26.38	1.27052e-08	1.23578e-08	1.14506e-08	1.21712e-08	6.47798e-10	0.366679	0.16753	0.533394	0.0283892
C3 FNIP2	25.36	25.36	25.36	2.32209e-08	2.32209e-08	2.32209e-08	2.32209e-08	0	0.815907	0	1.18687	0
FLCN KO C1 FNIP2	24.63	24.67	24.78	3.85151e-08	3.74619e-08	3.47118e-08	3.68963e-08	1.96376e-09	2.13391	1.61969	3.10412	0.165213
FLCN KO C2 FNIP2	22.95	22.96	22.98	1.23413e-07	1.22561e-07	1.20873e-07	1.22282e-07	1.29257e-09	3.49717	0.795556	5.08721	0.0537736
CFLCN KO 3 FNIP2	23.49	23.22	23.4	8.488e-08	1.02349e-07	9.03437e-08	9.25242e-08	8.93628e-09	2.62189	6.53124	3.81397	0.368365
C1 TBP	25.48	25.3	25.99	2.13676e-08	2.4207e-08	1.50048e-08	2.01931e-08	4.71218e-09	0.62015	0.558057
C2 TBP	25.58	25.52	25.79	1.99367e-08	2.07833e-08	1.7236e-08	1.93187e-08	1.85265e-09	0.582007	0.479122
C3 TBP	25.68	25.65	25.73	1.86016e-08	1.89924e-08	1.79679e-08	1.85206e-08	5.1702e-10	0.650755	0.317749
FLCN KO C1 TBP	25.7	25.44	25.66	1.83455e-08	2.19683e-08	1.88612e-08	1.9725e-08	1.9598e-09	1.1408	1.61643
FLCN KO C2 TBP	25.56	25.69	25.92	2.0215e-08	1.84731e-08	1.57508e-08	1.81463e-08	2.24996e-09	0.518968	1.38482
FLCN KO C3 TBP	25.21	25.25	25.21	2.57652e-08	2.50607e-08	2.57652e-08	2.55304e-08	4.06773e-10	0.723462	0.297297
C1 HPRT	24.4	23.77	24.49	4.51719e-08	6.99064e-08	4.244e-08	5.25061e-08	1.51309e-08	1.61251	1.79193
C2 HPRT	24.07	23.87	24.28	5.67816e-08	6.5225e-08	4.90899e-08	5.70322e-08	8.07049e-09	1.71819	2.08715
C3 HPRT	24.44	24.29	24.63	4.39366e-08	4.87508e-08	3.85151e-08	4.37342e-08	5.12083e-09	1.53668	3.14714
FLCN KO C1 HPRT	26.04	25.99	25.9	1.44937e-08	1.50048e-08	1.59707e-08	1.51564e-08	7.50067e-10	0.876575	0.618649
FLCN KO C2 HPRT	23.8	23.82	23.85	6.84678e-08	6.75251e-08	6.61355e-08	6.73761e-08	1.17325e-09	1.9269	0.722117
FLCN KO C3 HPRT	24.14	24.37	24.37	5.40924e-08	4.6121e-08	4.6121e-08	4.87781e-08	4.60225e-09	1.38224	3.36364
	Cp	cp	cp1 std	cp1 std	gem	gem std	normalized for HPRT/TBP	normalized for HPRT/TBP std	foldchange	foldchange std
P53KO C1_STAT2	23.26	23.27	9.95502e-08	9.88626e-08	9.92064e-08	4.86238e-10	1.37768	0.251559	1	0.00490127
P53KO C2_STAT2	23.5	23.49	8.42937e-08	8.488e-08	8.45869e-08	4.14583e-10	1.06396	0.134081	0.772283	0.00378517
P53KO C3_STAT2	23.26	23.3	9.95502e-08	9.6828e-08	9.81891e-08	1.92489e-09	1.42568	1.04158	1.03484	0.0202868
P53KO FLCNKO C1_STAT2	21.19	21.1	4.17998e-07	4.44905e-07	4.31451e-07	1.90259e-08	9.17635	29.1933	6.66071	0.293719
P53KO FLCNKO C2_STAT2	21.49	21.51	3.3952e-07	3.34846e-07	3.37183e-07	3.30521e-09	4.24872	1.15661	3.08396	0.0302303
P53KO FLCNKO C3_STAT2	21.8	21.87	2.73871e-07	2.609e-07	2.67385e-07	9.17194e-09	4.41411	3.29439	3.20401	0.109905
TP53KO C1_TBP	24.26	24.28	4.97751e-08	4.90899e-08	4.94325e-08	4.84558e-10	0.706979	0.353532
TP53KO C2_TBP	24.03	23.96	5.8378e-08	6.12804e-08	5.98292e-08	2.05228e-09	0.655197	0.655197
TP53KO C3_TBP	24.14	23.96	5.40924e-08	6.12804e-08	5.76864e-08	5.08269e-09	0.713935	1.74767
TP53KO FLCNKO C1_TBP	24.18	24.12	5.26132e-08	5.48475e-08	5.37303e-08	1.57986e-09	1.24409	1.52363
TP53KO FLCNKO C2_TBP	24.17	24.12	5.29792e-08	5.48475e-08	5.39133e-08	1.32109e-09	0.596668	0.596668
TP53KO FLCNKO C3_TBP	24.11	23.93	5.5229e-08	6.2568e-08	5.88985e-08	5.18948e-09	0.803045	1.13512
TP53KO C1_HPRT	23.31	23.23	9.61592e-08	1.01642e-07	9.89006e-08	3.87693e-09	1.41447	2.8286
TP53KO C2_HPRT	22.74	22.81	1.42751e-07	1.3599e-07	1.3937e-07	4.78072e-09	1.52626	1.52626
TP53KO C3_HPRT	23.09	23.06	1.12e-07	1.14353e-07	1.13177e-07	1.66407e-09	1.40069	0.572189
TP53KO FLCNKO C1_HPRT	24.8	24.76	3.42339e-08	3.51963e-08	3.47151e-08	6.80552e-10	0.803803	0.656328
TP53KO FLCNKO C2_HPRT	22.63	22.68	1.5406e-07	1.48813e-07	1.51437e-07	3.7108e-09	1.67597	1.67597
TP53KO FLCNKO C3_HPRT	23.34	23.43	9.41803e-08	8.84845e-08	9.13324e-08	4.02751e-09	1.24526	0.88096
