# Supplementary material for: Loss of FLCN-FNIP1/2 induces a non-canonical interferon response in human renal tubular epithelial cells
Source: eLife. 2021 Jan 18;10:e61630. doi: 10.7554/eLife.61630 (PMC7899648; doi:10.7554/eLife.61630)
Supplement: Figure 7—source data 1. [file elife-61630-fig7-data1.xlsx]

## Sheet: 7A
Name	Cp	cp	cp1 std	cp1 std	gem	gem std	normalized for HPRT/TBP	normalized for HPRT/TBP std	foldchange	foldchange std
RPTEC_WT_GPNMB	30.87	31.03	5.0957e-10	4.56078e-10	4.82824e-10	3.78246e-11	0.00827305	0.00986557	1	0.0783404
Fnip1/2KO_GPNMB	23.7	23.56	7.33819e-08	8.08599e-08	7.71209e-08	5.28774e-09	2.19393	3.77898	265.19	18.1826
RPTEC_WT_SQSTM1	22.7	22.89	1.46764e-07	1.28654e-07	1.37709e-07	1.28056e-08	2.3596	3.34	1	0.0929902
Fnip1/2KO_SQSTM1	22.21	22.28	2.06122e-07	1.96359e-07	2.01241e-07	6.90302e-09	5.72488	4.93337	2.4262	0.0832244
RPTEC_WT_STAT1	24.68	24.64	3.72031e-08	3.82491e-08	3.77261e-08	7.39579e-10	0.646426	0.1929	1	0.0196039
Fnip1/2KO_STAT1	23.37	23.32	9.22421e-08	9.5495e-08	9.38685e-08	2.30015e-09	2.67036	1.64385	4.13097	0.101225
RPTEC_WT_RRAGD	32.78	33.67	1.35593e-10	7.31678e-11	1.0438e-10	4.41412e-11	0.0029694	0.0315463	1	0.422888
Fnip1/2KO_RRAGD	25.91	25.77	1.58604e-08	1.74766e-08	1.66685e-08	1.14286e-09	0.474184	0.816767	159.69	10.949
RPTEC_WT_WIPI1	24.49	24.71	4.244e-08	3.64375e-08	3.94388e-08	4.2444e-09	0.675771	1.10704	1	0.10762
Fnip1/2KO_WIPI1	25.07	25.14	2.83908e-08	2.70462e-08	2.77185e-08	9.50809e-10	0.788534	0.679513	1.16686	0.0400262
RPTEC_WT_IFIT1	27.46	27.58	5.41647e-09	4.98417e-09	5.20032e-09	3.05683e-10	0.0891059	0.0797295	1	0.0587816
Fnip1/2KO_IFIT1	23.34	23.07	9.41803e-08	1.13563e-07	1.03872e-07	1.37059e-08	2.95494	9.79516	33.1621	4.37573
RPTEC_WT_ISG15	24.9	24.84	3.19413e-08	3.32978e-08	3.26195e-08	9.59129e-10	0.558926	0.250164	1	0.0294035
Fnip1/2KO_ISG15	22.18	22.11	2.10453e-07	2.20916e-07	2.15684e-07	7.39847e-09	6.13577	5.28745	10.9778	0.376563
RPTEC_WT_CTSD	21.7	21.65	2.93528e-07	3.03879e-07	2.98703e-07	7.31943e-09	5.11819	1.90908	1	0.024504
Fnip1/2KO_CTSD	19.31	19.2	1.53855e-06	1.66044e-06	1.5995e-06	8.61937e-08	45.5023	61.6	8.89031	0.479082
RPTEC_WT_MX1	29.56	29.36	1.26344e-09	1.45131e-09	1.35737e-09	1.32845e-10	0.0232582	0.0346491	1	0.0978691
Fnip1/2KO_MX1	25.26	25.31	2.48876e-08	2.40398e-08	2.44637e-08	5.99458e-10	0.695941	0.428414	29.9224	0.73322
RPTEC_WT_Fnip2	25.53	25.44	2.06397e-08	2.19683e-08	2.1304e-08	9.39451e-10	0.365038	0.245031	1	0.0440973
Fnip1/2KO_Fnip2	24.85	24.86	3.30677e-08	3.28393e-08	3.29535e-08	1.61514e-10	0.93746	0.115429	2.56811	0.012587
RPTEC_WT_OAS2	34.25	35.49	4.89466e-11	2.07227e-11	3.48346e-11	1.99574e-11	0.000596881	0.00520536	1	0.572917
Fnip1/2KO_OAS2	26.03	25.98	1.45945e-08	1.51092e-08	1.48518e-08	3.63929e-10	0.422504	0.260089	707.853	17.3452
RPTEC_WT_IRF9	24.74	24.67	3.56876e-08	3.74619e-08	3.65748e-08	1.2546e-09	0.626698	0.32723	1	0.0343023
Fnip1/2KO_IRF9	23.35	23.37	9.35297e-08	9.22421e-08	9.28859e-08	9.10507e-10	2.64241	0.650711	4.2164	0.041331
RPTEC_WT_STAT2	24.74	24.77	3.56876e-08	3.49532e-08	3.53204e-08	5.19328e-10	0.605205	0.135453	1	0.0147033
Fnip1/2KO_STAT2	22.79	22.86	1.37888e-07	1.31357e-07	1.34623e-07	4.61787e-09	3.82973	3.30024	6.328	0.217065
RPTEC_WT_TBP	24.84	24.64	3.32978e-08	3.82491e-08	3.57734e-08	3.50111e-09
Fnip1/2KO_TBP	25.21	25.1	2.57652e-08	2.78066e-08	2.67859e-08	1.44344e-09
RPTEC_WT_HPRT	23.28	23.37	9.81797e-08	9.22421e-08	9.52109e-08	4.19854e-09
Fnip1/2KO_HPRT	24.4	24.34	4.51719e-08	4.70901e-08	4.6131e-08	1.35641e-09

## Sheet: 7B
Name	Cp	cp	cp1 std	cp1 std	gem	gem std	normalized for HPRT	normalized for HPRT std	foldchange	foldchange std
RPEWT_GPNMB	23.47	23.14	8.60649e-08	1.08185e-07	9.71248e-08	1.56411e-08	1.78158	14.2056	1	0.161041
RPE_FLCNKO_GPNMB	23.48	23.43	8.54704e-08	8.84845e-08	8.69774e-08	2.1313e-09	1.43724	1.56939	0.806722	0.0197679
RPEWT_SQSTM1	21.83	21.64	2.68235e-07	3.05993e-07	2.87114e-07	2.66987e-08	5.26659	24.2484	1	0.0929902
RPE_FLCNKO_SQSTM1	22.09	22.1	2.24e-07	2.22452e-07	2.23226e-07	1.09409e-09	3.68866	0.805639	0.700388	0.00343279
RPEWT_STAT1	24.09	24.14	5.59999e-08	5.40924e-08	5.50461e-08	1.34885e-09	1.00972	1.22506	1	0.024504
RPE_FLCNKO_STAT1	23.95	23.96	6.17066e-08	6.12804e-08	6.14935e-08	3.01396e-10	1.01614	0.221935	1.00635	0.0049324
RPEWT_RRAGD	31.94	32.57	2.42718e-10	1.56839e-10	1.99778e-10	6.07259e-11	0.00366458	0.0551527	1	0.303966
RPE_FLCNKO_RRAGD	28.67	28.53	2.34137e-09	2.57997e-09	2.46067e-09	1.68714e-10	0.0406609	0.124233	11.0956	0.760765
RPEWT_WIPI1	23.71	23.84	7.2875e-08	6.65955e-08	6.97353e-08	4.4403e-09	1.27917	4.03279	1	0.0636737
RPE_FLCNKO_WIPI1	23.93	23.86	6.2568e-08	6.56787e-08	6.41233e-08	2.19958e-09	1.05959	1.61967	0.828345	0.0284141
RPEWT_IFIT1	24.71	24.79	3.64375e-08	3.4472e-08	3.54548e-08	1.38984e-09	0.650355	1.26228	1	0.0392003
RPE_FLCNKO_IFIT1	25.61	25.58	1.95264e-08	1.99367e-08	1.97315e-08	2.90119e-10	0.32605	0.213631	0.501342	0.0073714
RPEWT_ISG15	24.19	24.11	5.22498e-08	5.5229e-08	5.37394e-08	2.1066e-09	0.985754	1.91326	1	0.0392003
RPE_FLCNKO_ISG15	24.44	24.4	4.39366e-08	4.51719e-08	4.45543e-08	8.73438e-10	0.736228	0.64316	0.746869	0.0146415
RPEWT_CTSD	18.27	18.25	3.1636e-06	3.20777e-06	3.18568e-06	3.12274e-08	58.4357	28.3615	1	0.00980242
RPE_FLCNKO_CTSD	19.08	19.07	1.80446e-06	1.81701e-06	1.81074e-06	8.87491e-09	29.9212	6.53509	0.512036	0.00250963
RPEWT_MX1	34.12	34.45	5.3562e-11	4.26105e-11	4.80862e-11	7.74386e-12	0.000882057	0.00703316	1	0.161041
RPE_FLCNKO_MX1	34.68	35.88	3.63312e-11	1.58141e-11	2.60726e-11	1.45078e-11	0.000430832	0.0106829	0.488441	0.271787
RPEWT_Fnip2	25.56	25.6	2.0215e-08	1.96622e-08	1.99386e-08	3.90874e-10	0.365738	0.355001	1	0.0196039
RPE_FLCNKO_Fnip2	25.25	25.35	2.50607e-08	2.33824e-08	2.42215e-08	1.18669e-09	0.400244	0.873827	1.09435	0.0536157
RPEWT_OAS2	34.82	36.8	3.29713e-11	8.35788e-12	2.06646e-11	1.74043e-11	0.000379055	0.015807	1	0.842228
RPE_FLCNKO_OAS2	NA	NA	NA	NA	NA	NA	NA	NA	NA	NA
RPEWT_IRF9	24.07	24.06	5.67816e-08	5.71766e-08	5.69791e-08	2.7927e-10	1.04518	0.25364	1	0.00490127
RPE_FLCNKO_IRF9	24.58	24.64	3.98733e-08	3.82491e-08	3.90612e-08	1.14854e-09	0.64546	0.84573	0.617558	0.0181584
RPEWT_FLCN	27.02	27.02	7.34801e-09	7.34801e-09	7.34801e-09	0	0.134786	0	1	0
RPE_FLCNKO_FLCN	27.16	27.19	6.66846e-09	6.53122e-09	6.59984e-09	9.70397e-11	0.109058	0.0714556	0.809117	0.0118967
RPE WT_STAT2	23.09	23	1.12e-07	1.19209e-07	1.15605e-07	5.09785e-09	1.81066	1.25041	1	0.0440973
RPE FLCN KO_STAT2	22.72	22.73	1.44743e-07	1.43743e-07	1.44243e-07	7.06976e-10	2.10694	0.127891	1.16363	0.00570326
RPEWT_TBP	24.68	24.67	3.72031e-08	3.74619e-08	3.73325e-08	1.82977e-10
RPE_FLCNKO_TBP	24.44	24.65	4.39366e-08	3.79849e-08	4.09608e-08	4.20854e-09
RPEWT_HPRT	23.5	23.67	8.42937e-08	7.49238e-08	7.96088e-08	6.62549e-09
RPE_FLCNKO_HPRT	23.42	23.41	8.91e-08	8.97197e-08	8.94098e-08	4.38222e-10

## Sheet: 7E
Name	Cp	cp	cp1 std	cp1 std	gem	gem std	normalized for HPRT/TBP	normalized for HPRT/TBP std	foldchange	foldchange std
TP53 KO_GPNMB	28.99	28.77	1.8756e-09	2.18458e-09	2.03009e-09	2.18478e-10	0.0411875	0.112217	1	0.10762
FLCN KO C2_GPNMB	21.96	21.73	2.45121e-07	2.87487e-07	2.66304e-07	2.9957e-08	3.2961	9.17951	80.0267	9.00232
FLCN KO C2rescue_GPNMB	27.58	27.64	4.98417e-09	4.78113e-09	4.88265e-09	1.43567e-10	0.0358968	0.0358968	0.871547	0.0256265
FLCN KO C2siSTAT1/2_GPNM	22.12	21.97	2.1939e-07	2.43428e-07	2.31409e-07	1.69977e-08	3.11993	6.75013	75.7496	5.56405
TP53 KO_SQSTM1	20.99	20.9	4.80154e-07	5.11061e-07	4.95608e-07	2.1855e-08	10.0551	11.2254	1	0.0440973
FLCN KO C2_SQSTM1	20.6	20.5	6.2919e-07	6.7435e-07	6.5177e-07	3.19324e-08	8.06708	9.78482	0.802284	0.0393065
FLCN KO C2rescue_SQSTM1	21.67	21.77	2.99695e-07	2.79626e-07	2.8966e-07	1.41914e-08	2.12956	3.54836	0.211788	0.0103762
FLCN KO C2siSTAT1/2_SQSTM1	20.5	20.42	6.7435e-07	7.128e-07	6.93575e-07	2.71883e-08	9.351	10.797	0.929972	0.0364552
TP53 KO_STAT1	23.43	23.49	8.84845e-08	8.488e-08	8.66823e-08	2.54876e-09	1.75865	1.30912	1	0.0294035
FLCN KO C2_STAT1	21.46	21.32	3.46654e-07	3.8198e-07	3.64317e-07	2.49791e-08	4.50922	7.65419	2.56402	0.1758
FLCN KO C2rescue_STAT1	22.9	22.85	1.27765e-07	1.32271e-07	1.30018e-07	3.18597e-09	0.955882	0.796604	0.543531	0.0133187
FLCN KOC2siSTAT1/2_STAT1	23.72	23.74	7.23717e-08	7.13753e-08	7.18735e-08	7.04534e-10	0.969022	0.279784	0.551002	0.00540116
TP53 KO_RAGD	31.85	31.45	2.58342e-10	3.40884e-10	2.99613e-10	5.83662e-11	0.0060787	0.0299787	1	0.194805
FLCN KO C2_RAGD	21.35	21.32	3.74119e-07	3.8198e-07	3.78049e-07	5.55859e-09	4.67919	1.70328	769.767	11.3182
FLCN KO C2rescue_RAGD	24.93	24.82	3.1284e-08	3.37626e-08	3.25233e-08	1.75262e-09	0.239108	0.438216	39.3354	2.11971
FLCN KOC2siSTAT1/2_RAGD	21.51	21.32	3.34846e-07	3.8198e-07	3.58413e-07	3.33289e-08	4.83224	13.2355	794.946	73.9222
TP53 KO_WIPI1	24.77	24.95	3.49532e-08	3.08533e-08	3.29033e-08	2.89907e-09	0.667558	1.48905	1	0.088109
FLCN KO C2_WIPI1	21.53	21.66	3.30236e-07	3.0178e-07	3.16008e-07	2.01214e-08	3.91129	6.16566	5.8591	0.37307
FLCN KO C2rescue_WIPI1	22.25	22.23	2.00485e-07	2.03284e-07	2.01885e-07	1.97896e-09	1.48424	0.494809	2.22338	0.0217946
FLCN KOC2siSTAT1/2_WIPI1	21.91	21.98	2.53766e-07	2.41747e-07	2.47756e-07	8.49861e-09	3.34033	3.37496	5.00381	0.171642
TP53 KO_IFIT1	25.09	25.35	2.8e-08	2.33824e-08	2.56912e-08	3.26509e-09	0.521236	1.67705	1	0.12709
FLCN KO C2_IFIT1	24.94	24.73	3.10679e-08	3.59359e-08	3.35019e-08	3.44218e-09	0.414659	1.05476	0.79553	0.0817373
FLCN KO C2rescue_IFIT1	27.19	27.07	6.53122e-09	7.09771e-09	6.81446e-09	4.00565e-10	0.0500993	0.100155	0.0961164	0.00564988
FLCN KOC2siSTAT1/2_IFIT1	27.1	26.8	6.95164e-09	8.55847e-09	7.75505e-09	1.1362e-09	0.104556	0.451208	0.200593	0.0293891
TP53 KO_FLCN	26.04	26.02	1.44937e-08	1.4696e-08	1.45949e-08	1.43065e-10	0.296108	0.0734827	1	0.00980242
FLCN KO C2_FLCN	26.14	25.99	1.35231e-08	1.50048e-08	1.42639e-08	1.04773e-09	0.176547	0.32105	0.596227	0.0437948
FLCN KO C2rescue_FLCN	18.46	18.46	2.77323e-06	2.77323e-06	2.77323e-06	0	20.3886	0	68.8552	0
FLCN KOC2siSTAT1/2_FLCN	25.85	25.85	1.65339e-08	1.65339e-08	1.65339e-08	0	0.222915	0	0.752818	0
TP53 KO_ISG15	23.94	23.86	6.21358e-08	6.56787e-08	6.39072e-08	2.50518e-09	1.29658	1.28674	1	0.0392003
FLCN KO C2_ISG15	22.88	22.8	1.29549e-07	1.36936e-07	1.33242e-07	5.22313e-09	1.64916	1.60049	1.27193	0.04986
FLCN KO C2rescue_ISG15	23.7	23.69	7.33819e-08	7.38923e-08	7.36371e-08	3.60916e-10	0.541374	0.0902416	0.417539	0.00204647
FLCN KOC2siSTAT1/2_ISG15	24.17	23.87	5.29792e-08	6.5225e-08	5.91021e-08	8.65911e-09	0.796834	3.4387	0.614565	0.0900406
TP53 KO_CTSD	20.58	20.61	6.37974e-07	6.24844e-07	6.31409e-07	9.28382e-09	12.8103	4.76846	1	0.0147033
FLCN KO C2_CTSD	18.87	18.8	2.0872e-06	2.19097e-06	2.13908e-06	7.33755e-08	26.4758	22.484	2.06675	0.0708944
FLCN KO C2rescue_CTSD	21.15	21.13	4.2975e-07	4.35749e-07	4.32749e-07	4.24199e-09	3.18153	1.06065	0.248357	0.0024345
FLCN KOC2siSTAT1/2_CTSD	19	18.8	1.90735e-06	2.19097e-06	2.04916e-06	2.00549e-07	27.6274	79.642	2.15665	0.211069
TP53 KO_MX1	28.87	29.16	2.03828e-09	1.66711e-09	1.8527e-09	2.62455e-10	0.0375885	0.134805	1	0.141661
FLCN KO C2_MX1	25.78	25.82	1.73559e-08	1.68813e-08	1.71186e-08	3.35591e-10	0.21188	0.102833	5.63683	0.110504
FLCN KO C2rescue_MX1	29.27	29.24	1.54473e-09	1.57719e-09	1.56096e-09	2.29513e-11	0.011476	0.00573863	0.305307	0.00448903
FLCN KOC2siSTAT1/2_MX1	28.39	28.41	2.84288e-09	2.80374e-09	2.82331e-09	2.76753e-11	0.0380648	0.0109904	1.01267	0.00992664
TP53 KO_FNIP2	25.58	25.58	1.99367e-08	1.99367e-08	1.99367e-08	0	0.404485	0	1	0
FLCN KO C2_FNIP2	21.94	22.05	2.48543e-07	2.30297e-07	2.3942e-07	1.29019e-08	2.96335	3.95344	7.32621	0.394796
FLCN KO C2rescue_FNIP2	24.85	24.72	3.30677e-08	3.61858e-08	3.46268e-08	2.20482e-09	0.254573	0.551282	0.629375	0.0400746
FLCN KOC2siSTAT1/2_FNIP2	21.94	22.15	2.48543e-07	2.14875e-07	2.31709e-07	2.38071e-08	3.12398	9.45426	7.72334	0.79354
TP53 KO_OAS2	29.75	29.35	1.10754e-09	1.4614e-09	1.28447e-09	2.50221e-10	0.02606	0.128522	1	0.194805
FLCN KO C2_OAS2	25.81	25.45	1.69987e-08	2.18166e-08	1.94076e-08	3.40675e-09	0.240212	1.04391	9.21766	1.61804
FLCN KO C2rescue_OAS2	30.52	29.77	6.49478e-10	1.09229e-09	8.70883e-10	3.13114e-10	0.00640265	0.0782894	0.245689	0.0883341
FLCN KOC2siSTAT1/2_OAS2	29.97	29.68	9.50892e-10	1.1626e-09	1.05675e-09	1.49699e-10	0.0142474	0.0594485	0.546716	0.0774482
TP53 KO_IRF9	23.96	23.87	6.12804e-08	6.5225e-08	6.32527e-08	2.78927e-09	1.2833	1.43266	1	0.0440973
FLCN KO C2_IRF9	22.97	22.99	1.21714e-07	1.20038e-07	1.20876e-07	1.18488e-09	1.49611	0.363075	1.16583	0.0114279
FLCN KO C2rescue_IRF9	24.12	24.12	5.48475e-08	5.48475e-08	5.48475e-08	0	0.403234	0	0.314216	0
FLCN KOC2siSTAT1/2_IRF9	23.97	23.97	6.08571e-08	6.08571e-08	6.08571e-08	0	0.820495	0	0.639362	0
TP53 KO_STAT2	22.79	22.74	1.37888e-07	1.42751e-07	1.40319e-07	3.43838e-09	2.84687	1.76606	1	0.024504
FLCN KO C2_STAT2	21.23	21.14	4.06568e-07	4.32739e-07	4.19653e-07	1.85056e-08	5.19413	5.67054	1.8245	0.0804558
FLCN KO C2rescue_STAT2	23.15	23.16	1.07437e-07	1.06695e-07	1.07066e-07	5.24761e-10	0.787143	0.131209	0.276494	0.00135517
FLCN KOC2siSTAT1/2_STAT2	22.66	22.75	1.5089e-07	1.41765e-07	1.46327e-07	6.45264e-09	1.97283	2.56247	0.692983	0.0305587
TP53 KO_TBP	24.71	24.76	3.64375e-08	3.51963e-08	3.58169e-08	8.77658e-10
FLCN KO C2_TBP	24.56	24.39	4.043e-08	4.54861e-08	4.2958e-08	3.57521e-09
FLCN KO C2rescue_TBP	23.82	23.88	6.75251e-08	6.47744e-08	6.61498e-08	1.94504e-09
FLCN KOC2siSTAT1/2_TBP	24.59	24.51	3.95979e-08	4.18557e-08	4.07268e-08	1.5965e-09
TP53 KO_HPRT	23.75	23.88	7.08823e-08	6.47744e-08	6.78284e-08	4.31888e-09
FLCN KO C2_HPRT	22.67	22.63	1.49848e-07	1.5406e-07	1.51954e-07	2.97889e-09
FLCN KO C2rescue_HPRT	21.8	21.74	2.73871e-07	2.85501e-07	2.79686e-07	8.22375e-09
FLCN KOC2siSTAT1/2_HPRT	22.79	22.85	1.37888e-07	1.32271e-07	1.35079e-07	3.97181e-09
