# Supplementary material for: Loss of FLCN-FNIP1/2 induces a non-canonical interferon response in human renal tubular epithelial cells
Source: eLife. 2021 Jan 18;10:e61630. doi: 10.7554/eLife.61630 (PMC7899648; doi:10.7554/eLife.61630)
Supplement: Figure 8—source data 1. [file elife-61630-fig8-data1.xlsx]

## Sheet: Fig 8A
Name	Cp	cp	cp1 std	cp1 std	gem	gem std	normalized for HPRT/TBP	normalized for HPRT/TBP std	foldchange	foldchange std
WT_GPNMB	25.97	25.98	1.52143e-08	1.51092e-08	1.51617e-08	7.43117e-11	0.298422	0.0215823	1	0.00490127
WT_TFE3-SFPQ_GPNMB	21.26	21.37	3.98201e-07	3.68968e-07	3.83585e-07	2.06706e-08	6.92491	5.98674	23.2051	1.25048
FLCNKO_GPNMB	21.9	21.99	2.55531e-07	2.40077e-07	2.47804e-07	1.09275e-08	7.92034	17.8161	29.7956	1.3139
WT_STAT1	23.32	23.36	9.5495e-08	9.28837e-08	9.41893e-08	1.84648e-09	1.85389	0.536271	1	0.0196039
WT_TFE3-SFPQ_STAT1	24.28	24.29	4.90899e-08	4.87508e-08	4.89203e-08	2.39772e-10	0.883165	0.069444	0.476385	0.00233489
FLCNKO_STAT1	22.59	22.6	1.58392e-07	1.57298e-07	1.57845e-07	7.73639e-10	5.04506	1.26134	3.34205	0.0163803
WT_RRAGD	29.75	29.64	1.10754e-09	1.19528e-09	1.15141e-09	6.20473e-11	0.0226627	0.0180203	1	0.0538881
WT_TFE3-SFPQ_RRAGD	20.88	20.95	5.18196e-07	4.93653e-07	5.05924e-07	1.73544e-08	9.13352	5.02626	403.02	13.8245
FLCNKO_RRAGD	22.16	22.14	2.13391e-07	2.16369e-07	2.1488e-07	2.10635e-09	6.86803	3.43418	219.074	2.14746
WT_WIPI1	24.84	24.94	3.32978e-08	3.10679e-08	3.21828e-08	1.57674e-09	0.633441	0.457932	1	0.0489933
WT_TFE3-SFPQ_WIPI1	25.01	25.05	2.95965e-08	2.87871e-08	2.91918e-08	5.72273e-10	0.527004	0.165745	0.831969	0.0163098
FLCNKO_WIPI1	24.24	24.38	5.047e-08	4.58024e-08	4.81362e-08	3.30042e-09	1.53854	5.381	3.04971	0.209101
WT_IFIT1	25.97	26.16	1.52143e-08	1.33369e-08	1.42756e-08	1.32749e-09	0.280981	0.385542	1	0.0929902
WT_TFE3-SFPQ_IFIT1	26.87	26.41	8.15312e-09	1.1215e-08	9.68404e-09	2.16505e-09	0.174827	0.627053	0.622204	0.139105
FLCNKO_IFIT1	26.2	26	1.29722e-08	1.49012e-08	1.39367e-08	1.36397e-09	0.445447	2.22382	4.51259	0.441643
WT_Isg15	25.19	25.07	2.61249e-08	2.83908e-08	2.72579e-08	1.60226e-09	0.536505	0.465343	1	0.0587816
WT_TFE3-SFPQ_Isg15	25.49	25.62	2.122e-08	1.93915e-08	2.03058e-08	1.29294e-09	0.366583	0.374469	0.683279	0.0435069
FLCNKO_ISG15	24.93	24.98	3.1284e-08	3.02183e-08	3.07512e-08	7.53527e-10	0.982874	1.22855	2.12471	0.052064
WT_CTSD	18.5	18.45	2.6974e-06	2.79252e-06	2.74496e-06	6.72625e-08	54.0279	19.535	1	0.024504
WT_TFE3-SFPQ_CTSD	18.23	18.15	3.25254e-06	3.438e-06	3.34527e-06	1.31136e-07	60.3926	37.9802	1.1178	0.0438182
FLCNKO_CTSD	18.18	18.09	3.36724e-06	3.58399e-06	3.47562e-06	1.53266e-07	111.088	249.884	2.862	0.126207
WT_MX1	27.61	27.48	4.8816e-09	5.3419e-09	5.11175e-09	3.25484e-10	0.100612	0.09453	1	0.0636737
WT_TFE3-SFPQ_MX1	28.44	28.35	2.74604e-09	2.9228e-09	2.83442e-09	1.2499e-10	0.0511702	0.0362004	0.508587	0.0224273
FLCNKO_MX1	27.48	27.33	5.3419e-09	5.92721e-09	5.63455e-09	4.13876e-10	0.180092	0.674782	1.8576	0.136446
WT_Fnip2	25.74	25.8	1.78438e-08	1.71169e-08	1.74804e-08	5.13985e-10	0.344059	0.149276	1	0.0294035
WT_TFE3-SFPQ_Fnip2	24.4	24.52	4.51719e-08	4.15666e-08	4.33692e-08	2.54931e-09	0.782951	0.738346	2.27563	0.133765
FLCNKO_Fnip2	22.35	22.43	1.87059e-07	1.76969e-07	1.82014e-07	7.13501e-09	5.81757	11.6329	18.3318	0.718614
WT_OAS2	28.96	29	1.91501e-09	1.86265e-09	1.88883e-09	3.70284e-11	0.037177	0.0107541	1	0.0196039
WT_TFE3-SFPQ_OAS2	31.43	31.14	3.45643e-10	4.22597e-10	3.8412e-10	5.44147e-11	0.00693456	0.0157599	0.186528	0.0264237
FLCNKO_OAS2	30.08	29.49	8.81085e-10	1.32625e-09	1.10367e-09	3.14779e-10	0.0352756	0.513215	1.12719	0.321488
WT_IRF9	23.47	23.48	8.60649e-08	8.54704e-08	8.57676e-08	4.2037e-10	1.22653	0.175252	1	0.00490127
WT_TFE3-SFPQ_IRF9	24.7	24.83	3.6691e-08	3.35294e-08	3.51102e-08	2.23559e-09	0.462079	1.31011	0.376737	0.0239882
FLCNKO_IRF9	24	23.97	5.96046e-08	6.08571e-08	6.02309e-08	8.85595e-10	1.92511	1.44387	1.49202	0.0219377
WT_STAT2	23.12	23.25	1.09695e-07	1.00243e-07	1.04969e-07	6.68375e-09	1.50112	2.78646	1	0.0636737
WT_TFE3-SFPQ_STAT2	23.77	23.82	6.99064e-08	6.75251e-08	6.87158e-08	1.68381e-09	0.904358	0.986751	0.602455	0.0147626
FLCNKO_STAT2	22.36	22.44	1.85767e-07	1.75747e-07	1.80757e-07	7.08572e-09	5.77738	11.5525	4.04928	0.158733
WT_TBP	24.71	24.5	3.64375e-08	4.21468e-08	3.92922e-08	4.03711e-09
WT_TFE3-SFPQ_TBP	25.01	24.69	2.95965e-08	3.69462e-08	3.32713e-08	5.19703e-09
FLCNKO_TBP	25.16	25.12	2.66738e-08	2.74237e-08	2.70488e-08	5.30262e-10	0.864537	0.864537
WT_HPRT	22.97	23.16	1.21714e-07	1.06695e-07	1.14205e-07	1.06199e-08
WT_TFE3-SFPQ_HPRT	23.59	23.65	7.91958e-08	7.59697e-08	7.75828e-08	2.28121e-09
FLCNKO_HPRT	24.74	24.7	3.56876e-08	3.6691e-08	3.61893e-08	7.09452e-10	1.15669	1.15669

## Sheet: Fig 8 - supplemental 1C
Name	Cp	cp	cp1 std	cp1 std	gem	gem std	normalized for HPRT/TBP	normalized for HPRT/TBP std	foldchange	foldchange std
FLCN KOsiNT_TFE3	25.05	24.96	2.87871e-08	3.06402e-08	2.97137e-08	1.31029e-09	0.640396	0.505606	1	0.0440973
FLCN KOsiTFE_TFE3	27.11	26.65	6.90362e-09	9.49622e-09	8.19992e-09	1.83324e-09	0.175588	1.07053	0.274187	0.0612995
FLCN KOsiNT_FNIP2	22.22	22.31	2.04698e-07	1.92318e-07	1.98508e-07	8.75368e-09	4.2783	3.37781	1	0.0440973
FLCN KOsiTFE_FNIP2	24.07	24.11	5.67816e-08	5.5229e-08	5.60053e-08	1.09792e-09	1.19926	0.641137	0.280313	0.00549524
FLCN KOsiNT_GPNMB	20.45	20.41	6.9813e-07	7.17758e-07	7.07944e-07	1.38785e-08	15.2578	5.35532	1	0.0196039
FLCN KOsiTFE_GPNMB	22.65	22.65	1.51939e-07	1.51939e-07	1.51939e-07	0	3.25354	0	0.213238	0
FLCN KOsiNT_RRAGD	21.39	21.38	3.63889e-07	3.6642e-07	3.65154e-07	1.78972e-09	7.86989	0.690604	1	0.00490127
FLCN KOsiTFE_RRAGD	23.74	23.88	7.13753e-08	6.47744e-08	6.80749e-08	4.6675e-09	1.45771	2.72561	0.185227	0.0126999
FLCN KOsiNT_SQSTM1	21.03	21.03	4.67024e-07	4.67024e-07	4.67024e-07	0	10.0654	0	1	0
FLCN KOsiTFE_SQSTM1	21.59	21.6	3.16783e-07	3.14595e-07	3.15689e-07	1.54728e-09	6.75998	0.903541	0.671605	0.00329172
FLCN KOsiNT_RRAGC	22.54	22.62	1.63977e-07	1.55132e-07	1.59555e-07	6.25459e-09	3.43876	2.41348	1	0.0392003
FLCN KOsiTFE_RRAGC	23.81	23.89	6.79948e-08	6.4327e-08	6.61609e-08	2.59353e-09	1.41673	1.5145	0.411988	0.0161501
FLCN KOsiNT_GABARAP	21.91	21.8	2.53766e-07	2.73871e-07	2.63818e-07	1.42167e-08	5.68588	5.48583	1	0.0538881
FLCN KOsiTFE_GABARAP	23.27	23.06	9.88626e-08	1.14353e-07	1.06608e-07	1.09535e-08	2.28284	6.39636	0.401493	0.0412517
FLCN KOsiNT_ARHGAP12	23.85	23.97	6.61355e-08	6.08571e-08	6.34963e-08	3.73241e-09	1.36849	1.44024	1	0.0587816
FLCN KOsiTFE_ARHGAP12	25.72	25.45	1.80929e-08	2.18166e-08	1.99547e-08	2.63303e-09	0.427299	1.53757	0.312242	0.0412003
FLCN KOsiNT_AMDHD2	29.78	29.93	1.08474e-09	9.77625e-10	1.03118e-09	7.57437e-11	0.0222243	0.0292275	1	0.0734532
FLCN KOsiTFE_AMDHD2	32.09	32.03	2.1875e-10	2.28039e-10	2.23394e-10	6.56858e-12	0.00478363	0.00383575	0.215243	0.0063289
FLCN KOsiNT_WIPI1	23.73	23.67	7.18717e-08	7.49238e-08	7.33978e-08	2.15815e-09	1.58189	0.832772	1	0.0294035
FLCN KOsiTFE_WIPI1	24.94	24.99	3.10679e-08	3.00096e-08	3.05388e-08	7.48322e-10	0.653939	0.436986	0.413391	0.0101297
FLCN KOsiNT_TFEB	31.19	31.32	4.08201e-10	3.73027e-10	3.90614e-10	2.48719e-11	0.00841862	0.00959737	1	0.0636737
FLCN KOsiTFE_TFEB	34.63	34.09	3.76124e-11	5.46874e-11	4.61499e-11	1.20739e-11	0.000988227	0.00705059	0.117386	0.0307108
FLCN KOsiNT_TBP	24.56	24.46	4.043e-08	4.33318e-08	4.18809e-08	2.05188e-09
FLCN KOsiTFE_TBP	24.87	24.8	3.26125e-08	3.42339e-08	3.34232e-08	1.14649e-09
FLCN KOsiNT_HPRT	24.15	24.28	5.37187e-08	4.90899e-08	5.14043e-08	3.2731e-09
FLCN KOsiTFE_HPRT	23.83	23.91	6.70587e-08	6.34414e-08	6.52501e-08	2.55782e-09

## Sheet: Fig 8 - supplemental 1D
Name	Cp	cp	cp1 std	cp1 std	gem	gem std	normalized for geomean	normalized for geomean std	foldchange	foldchange std
WT_GPNMB	26.01	26.11	1.47982e-08	1.38072e-08	1.43027e-08	7.00738e-10	0.265823	0.320229	1	0.0489933
FLCNKO_TFE3-SFPQ_GPNMB	22.98	22.89	1.20873e-07	1.28654e-07	1.24764e-07	5.50174e-09	44.5591	26.7645	167.627	7.39189
WT_SQSTM1	21.68	21.52	2.97625e-07	3.32533e-07	3.15079e-07	2.46834e-08	5.85589	11.28	1	0.0783404
FLCNKO_TFE3-SFPQ_SQSTM1	23.87	23.73	6.5225e-08	7.18717e-08	6.85484e-08	4.69997e-09	24.4819	22.8641	4.18073	0.286649
WT_STAT1	23.62	23.49	7.7566e-08	8.488e-08	8.1223e-08	5.17177e-09	1.50957	2.36344	1	0.0636737
FLCNKO_TFE3-SFPQ_STAT1	26.17	26.24	1.32448e-08	1.26175e-08	1.29311e-08	4.43568e-10	4.61832	2.15784	3.05937	0.104943
WT_RRAGD	29.07	29.22	1.77443e-09	1.5992e-09	1.68681e-09	1.23902e-10	0.0313502	0.0566218	1	0.0734532
FLCNKO_TFE3-SFPQ_RRAGD	22.55	22.43	1.62845e-07	1.76969e-07	1.69907e-07	9.9874e-09	60.6818	48.586	1935.61	113.778
WT_WIPI1	25.11	25.16	2.76145e-08	2.66738e-08	2.71442e-08	6.6514e-10	0.504487	0.303962	1	0.024504
FLCNKO_TFE3-SFPQ_WIPI1	26.98	27.42	7.55459e-09	5.56875e-09	6.56167e-09	1.4042e-09	2.34348	6.83106	4.64528	0.994093
WT_IFIT1	27.56	27.42	5.05374e-09	5.56875e-09	5.31125e-09	3.64162e-10	0.098712	0.166418	1	0.0685643
FLCNKO_TFE3-SFPQ_IFIT1	27.64	27.46	4.78113e-09	5.41647e-09	5.0988e-09	4.4925e-10	1.82102	2.18548	18.4479	1.62542
WT_ISG15	25.24	25.28	2.5235e-08	2.45449e-08	2.489e-08	4.8794e-10	0.462591	0.222983	1	0.0196039
FLCNKO_TFE3-SFPQ_ISG15	28.55	28.16	2.54445e-09	3.33423e-09	2.93934e-09	5.58459e-10	1.04978	2.71675	2.26934	0.431163
WT_CTSD	18.82	18.92	2.1608e-06	2.0161e-06	2.08845e-06	1.0232e-07	38.8149	46.7592	1	0.0489933
FLCNKO_TFE3-SFPQ_CTSD	20.03	20	9.34048e-07	9.53674e-07	9.43861e-07	1.38779e-08	337.098	67.5123	8.68475	0.127695
WT_MX1	27.47	27.56	5.37906e-09	5.05374e-09	5.2164e-09	2.30029e-10	0.0969492	0.105121	1	0.0440973
FLCNKO_TFE3-SFPQ_MX1	30.45	30.66	6.81768e-10	5.89414e-10	6.35591e-10	6.53043e-11	0.227	0.317688	2.34143	0.240572
WT_Fnip2	25.87	25.74	1.63062e-08	1.78438e-08	1.7075e-08	1.08723e-09	0.317348	0.496852	1	0.0636737
FLCNKO_TFE3-SFPQ_Fnip2	25.19	25.04	2.61249e-08	2.89874e-08	2.75561e-08	2.02409e-09	9.8416	9.84663	31.0121	2.27794
WT_OAS2	29.32	28.99	1.49211e-09	1.8756e-09	1.68385e-09	2.7117e-10	0.0312952	0.123922	1	0.161041
FLCNKO_TFE3-SFPQ_OAS2	33.62		7.57481e-11	1	7.57481e-11		0.0270532		0.864452
WT_IRF9	23.78	23.78	6.94235e-08	6.94235e-08	6.94235e-08	0	1.29027	0	1	0
FLCNKO_TFE3-SFPQ_IRF9	27.29	27.34	6.09385e-09	5.88627e-09	5.99006e-09	1.4678e-10	2.13933	0.714047	1.65805	0.0406289
WT_STAT2	23.65	23.62	7.59697e-08	7.7566e-08	7.67679e-08	1.12874e-09	1.42677	0.515824	1	0.0147033
FLCNKO_TFE3-SFPQ_STAT2	24.99	25.05	3.00096e-08	2.87871e-08	2.93984e-08	8.64415e-10	10.4996	4.20515	7.35899	0.21638
WT_TBP	24.64	24.67	3.82491e-08	3.74619e-08	3.78555e-08	5.56602e-10	0.703562	0.254361
FLCNKO_TFE3-SFPQ_TBP	28.38	28.47	2.86265e-09	2.68953e-09	2.77609e-09	1.22418e-10	0.991474	0.595531
WT_HPRT	23.76	23.53	7.03926e-08	8.2559e-08	7.64758e-08	8.60288e-09	1.42134	3.93142
FLCNKO_TFE3-SFPQ_HPRT	28.28	28.53	3.06812e-09	2.57997e-09	2.82404e-09	3.45173e-10	1.0086	1.67917
