# Supplementary material for: Loss of FLCN-FNIP1/2 induces a non-canonical interferon response in human renal tubular epithelial cells
Source: eLife journal article supplement (doi:10.7554/elife.61630), 2021-01-18

**A**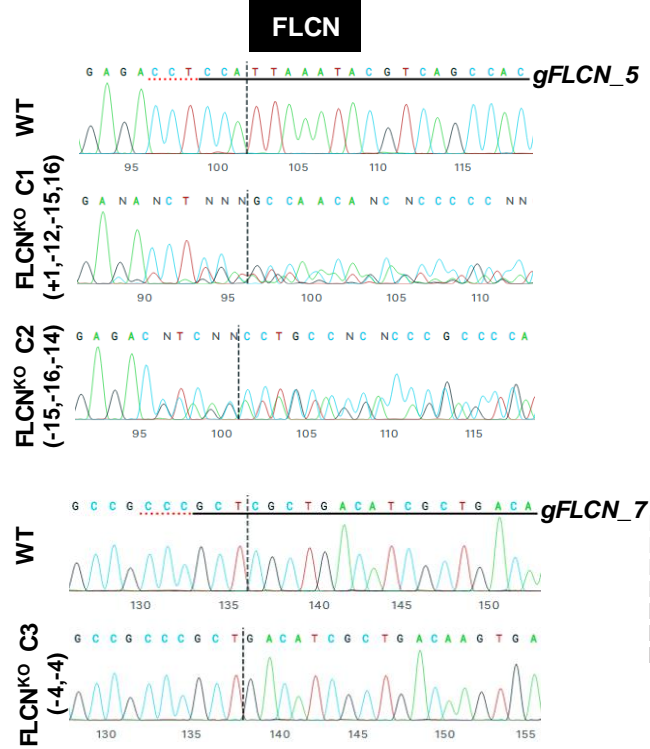**TP53**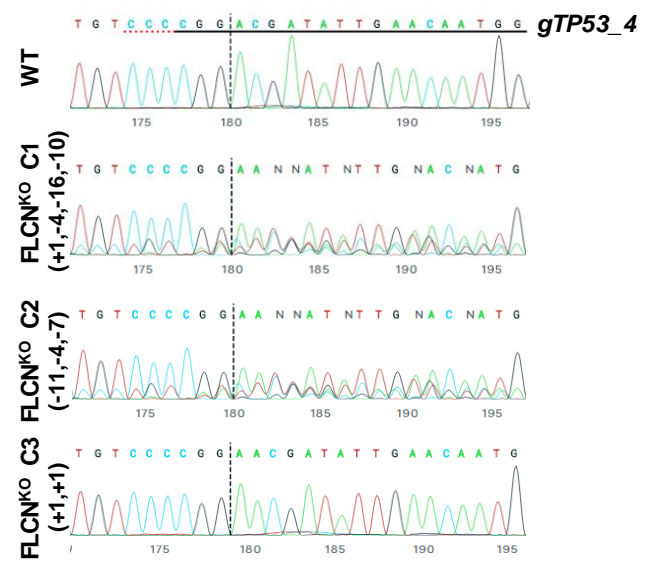**B**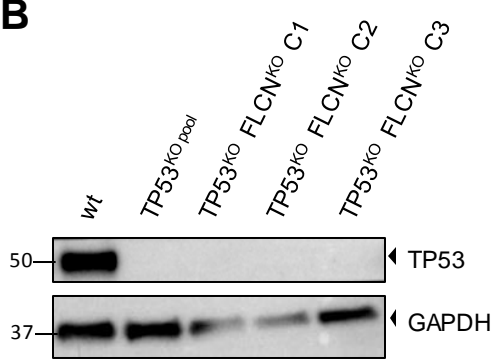**C**

**RPTEC/TERT1 tet on Cas9 TP53<sup>KO</sup> FLCN<sup>KO</sup> C1**  
**TFE3 LAMP2**

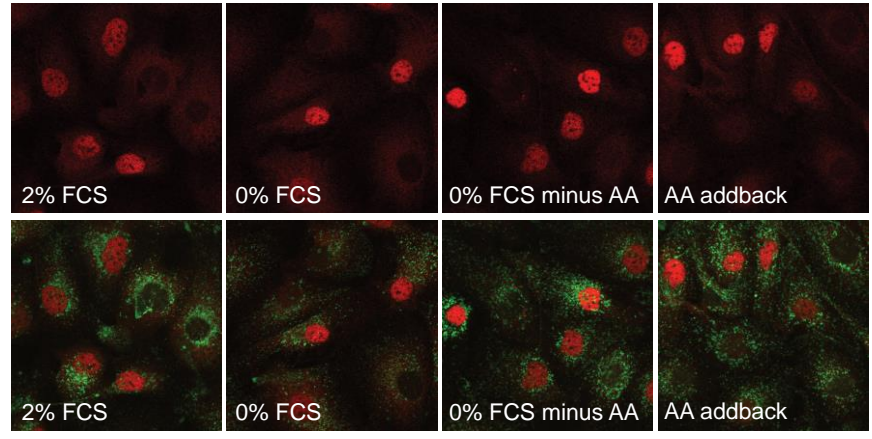

**RPTEC/TERT1 tet on Cas9 TP53<sup>KO</sup> FLCN<sup>KO</sup> C2**  
**TFE3 LAMP2**

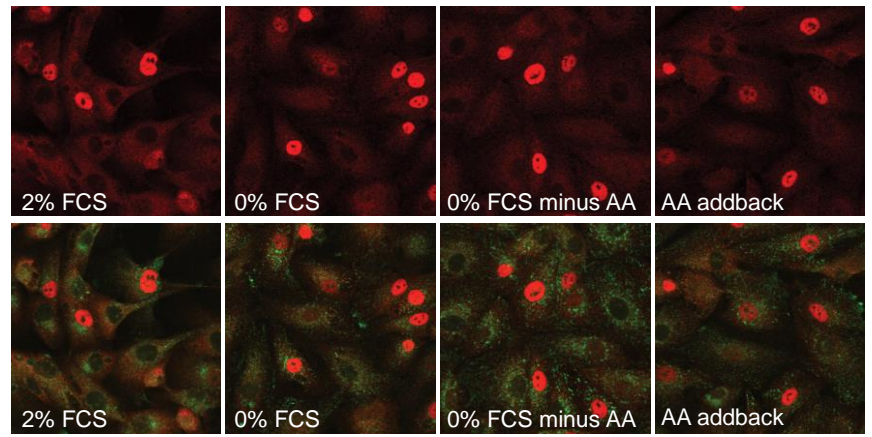

Supplement: supp [file elife-61630-supp-v1.zip]
