# Supplementary material for: Loss of FLCN-FNIP1/2 induces a non-canonical interferon response in human renal tubular epithelial cells
Source: eLife journal article supplement (doi:10.7554/elife.61630), 2021-01-18

A

1. RPTEC wt pool

2. RPTEC tet on Cas9 pool

3. RPTEC tet on Cas9 P53<sup>KO</sup> pool

4. RPTEC tet on Cas9 P53<sup>KO</sup> FLCN<sup>KO</sup> C1

5. RPTEC tet on Cas9 P53<sup>KO</sup> FLCN<sup>KO</sup> C2

6. RPTEC tet on Cas9 P53<sup>KO</sup> FLCN<sup>KO</sup> C3
- Proteomic analysis

✓

✓

✓

✓

✓

✓

B

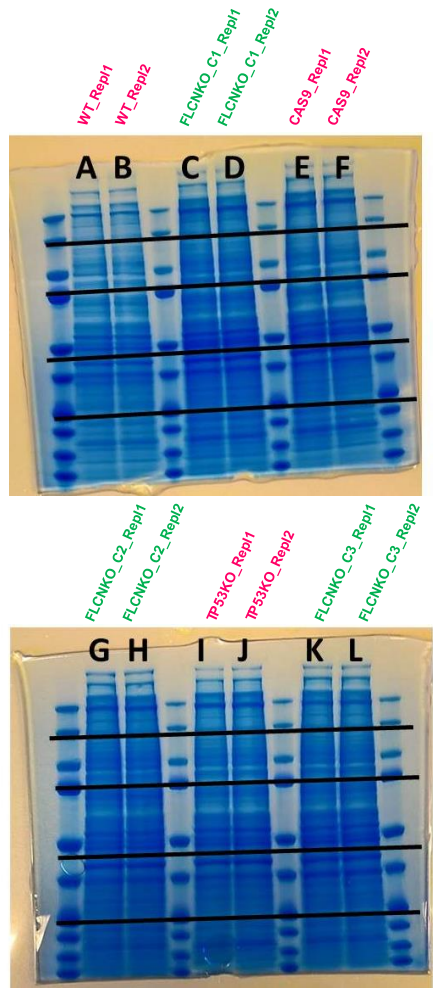

C

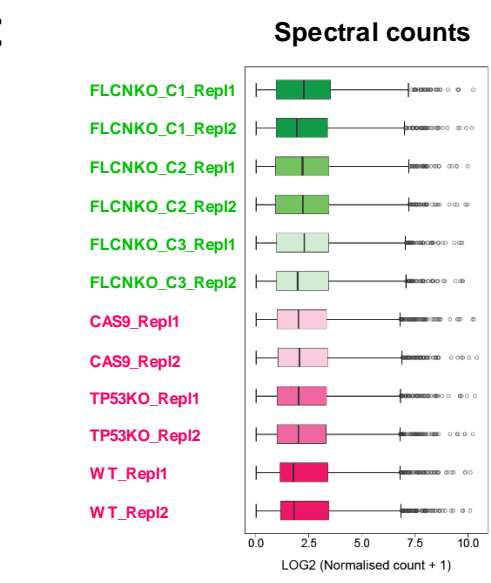

D

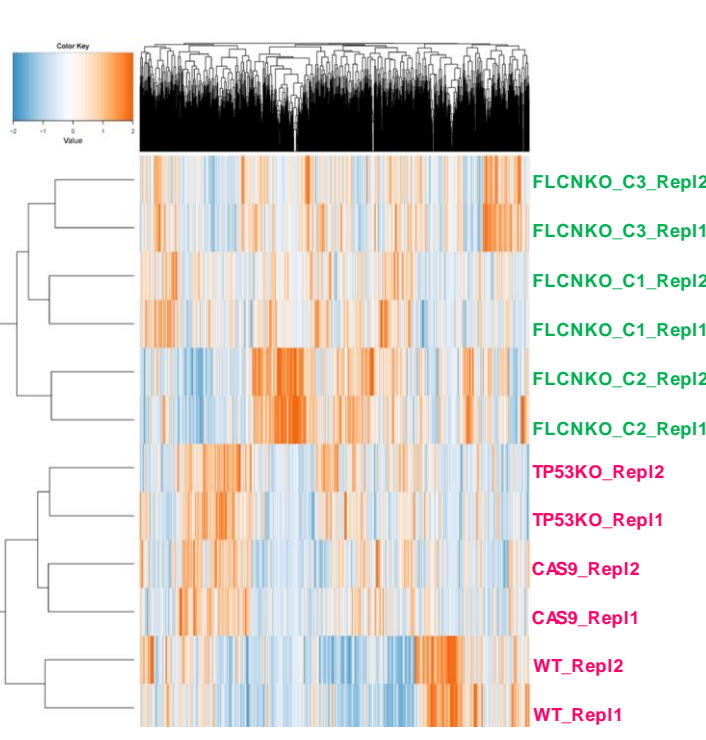

E

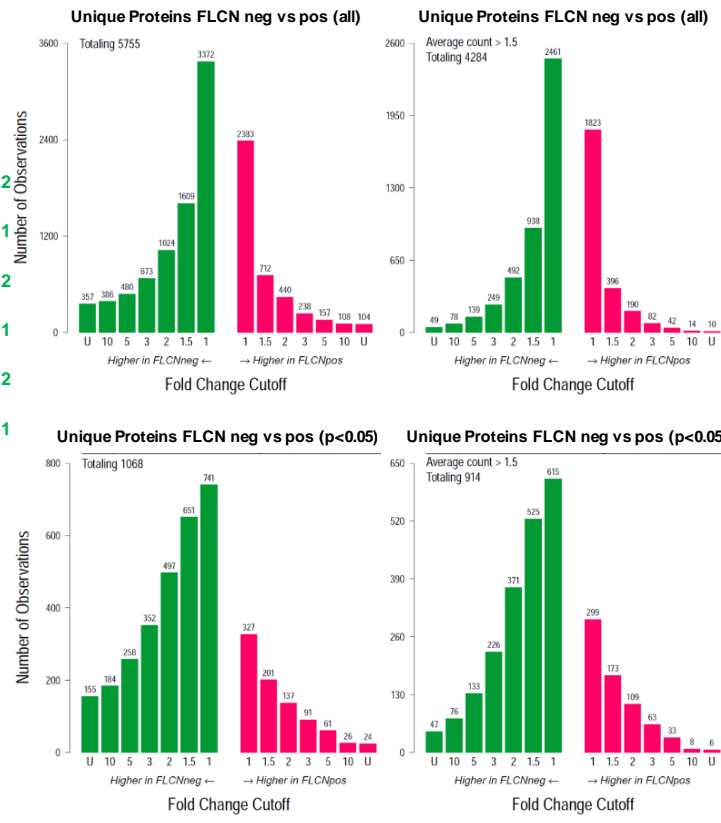

Supplement: supp [file elife-61630-supp-v1.zip]
