# Supplementary material for: Loss of FLCN-FNIP1/2 induces a non-canonical interferon response in human renal tubular epithelial cells
Source: eLife. 2021 Jan 18;10:e61630. doi: 10.7554/eLife.61630 (PMC7899648; doi:10.7554/eLife.61630)
Supplement: Supplementary file 1. [file elife-61630-supp1.xlsx]

## Sheet: RNAseq_FC_Pvalues_FDR
transcript_id	gene_id	Gene.Symbol.HGNC27Feb2018	Protein.Name.HGNC27Feb2018	Chrom.Loc.HGNC27Feb2018	logFC	logCPM	PValue	FDR
NR_039978	1/2-SBSRNA4	SEC24B-AS1	SEC24B antisense RNA 1	4q25	-0.573671	-0.360138	0.320799	0.862931
NM_130786	A1BG	A1BG	alpha-1-B glycoprotein	19q13.43	0.223868	0.526127	0.639127	1
NR_015380	A1BG-AS1	A1BG-AS1	A1BG antisense RNA 1	19q13.43	-0.205452	1.9141	0.661068	1
NM_001198820	A1CF	A1CF	APOBEC1 complementation factor	10q11.23	-2.35273	-2.97579	0.51014	0.967235
NM_033110	A2LD1	GGACT	gamma-glutamylamine cyclotransferase	13q32.3	-0.134039	1.88259	0.769564	1
NM_000014	A2M	A2M	alpha-2-macroglobulin	12p13.31	-1.89861	-3.03235	1	1
NM_017436	A4GALT	A4GALT	alpha 1,4-galactosyltransferase (P blood group)	22q13.2	-0.44811	6.01827	0.286026	0.819456
NM_005123	NR1H4	NR1H4	nuclear receptor subfamily 1 group H member 4	12q23.1	-10.5436	2.41736	4.64903e-30	3.93244e-27
NM_015665	AAAS	AAAS	aladin WD repeat nucleoporin	12q13.13	0.111437	6.10735	0.790769	1
NM_023928	AACS	AACS	acetoacetyl-CoA synthetase	12q24.31	0.340384	5.08861	0.419574	0.934541
NM_017700	ARHGEF38	ARHGEF38	Rho guanine nucleotide exchange factor 38	4q24	-10.4307	2.30635	2.76143e-29	2.0555e-26
NM_001086	AADAC	AADAC	arylacetamide deacetylase	3q25.1	1.85655	-3.0345	1	1
NM_182662	AADAT	AADAT	aminoadipate aminotransferase	4q33	-0.289321	3.30629	0.500595	0.967235
NM_024666	AAGAB	AAGAB	alpha and gamma adaptin binding protein	15q23	0.102719	5.88561	0.806846	1
NM_014911	AAK1	AAK1	AP2 associated kinase 1	2p13.3	0.04731	5.34874	0.911216	1
NM_001087	AAMP	AAMP	angio associated migratory cell protein	2q35	-0.24817	6.50784	0.553743	0.990257
NM_001166579	AANAT	AANAT	aralkylamine N-acetyltransferase	17q25.1	0.467756	-2.64997	1	1
NM_001605	AARS	AARS	alanyl-tRNA synthetase	16q22.1	0.646302	7.7315	0.123434	0.562717
NM_020745	AARS2	AARS2	alanyl-tRNA synthetase 2, mitochondrial	6p21.1	-0.11512	5.33446	0.785424	1
NM_001136042	AARSD1	AARSD1	alanyl-tRNA synthetase domain containing 1	17q21.31	0.0120862	4.8308	0.97872	1
NM_181806	AASDH	AASDH	aminoadipate-semialdehyde dehydrogenase	4q12	0.236289	3.62729	0.581689	1
NM_015423	AASDHPPT	AASDHPPT	aminoadipate-semialdehyde dehydrogenase-phosphopantetheinyl transferase	11q22.3	-0.354368	5.73351	0.398938	0.91818
NM_005763	AASS	AASS	aminoadipate-semialdehyde synthase	7q31.32	0.14571	4.4717	0.73126	1
NM_012138	AATF	AATF	apoptosis antagonizing transcription factor	17q12	0.0150201	6.72679	0.971751	1
NM_004920	AATK	AATK	apoptosis associated tyrosine kinase	17q25.3	-0.975486	-0.658566	0.118958	0.549712
NM_020686	ABAT	ABAT	4-aminobutyrate aminotransferase	16p13.2	0.320282	-1.06654	0.717329	1
NM_006043	HS3ST2	HS3ST2	heparan sulfate-glucosamine 3-sulfotransferase 2	16p12.2	-10.0474	5.04948	2.35172e-45	2.18816e-41
NM_004210	NEURL	NEURL1	neuralized E3 ubiquitin protein ligase 1	10q24.33	-9.97551	1.85539	3.20616e-26	1.86448e-23
NR_002451	ABCA11P	ABCA11P	ATP binding cassette subfamily A member 11, pseudogene	4p16.3	0.121229	2.72824	0.785824	1
NM_173076	ABCA12	ABCA12	ATP binding cassette subfamily A member 12	2q35	-0.230962	1.05625	0.632929	1
NM_006744	RBP4	RBP4	retinol binding protein 4	10q23.33	-9.89609	5.27142	4.14895e-46	7.72079e-42
NR_003574	ABCA17P	ABCA17P	ATP binding cassette subfamily A member 17, pseudogene	16p13.3	0.813447	-1.39707	0.292229	0.827211
NM_212533	ABCA2	ABCA2	ATP binding cassette subfamily A member 2	9q34.3	0.038084	6.55287	0.928208	1
NM_001089	ABCA3	ABCA3	ATP binding cassette subfamily A member 3	16p13.3	0.814372	6.14025	0.0533994	0.336851
NM_000350	ABCA4	ABCA4	ATP binding cassette subfamily A member 4	1p22.1	-1.41705	-1.49803	0.0772726	0.420033
NM_018672	ABCA5	ABCA5	ATP binding cassette subfamily A member 5	17q24.3	-0.732103	3.24548	0.08949	0.462688
NM_001160332	NFASC	NFASC	neurofascin	1q32.1	-9.66048	1.54616	3.94655e-24	1.93267e-21
NM_019112	ABCA7	ABCA7	ATP binding cassette subfamily A member 7	19p13.3	-0.916936	4.89978	0.0306712	0.230611
NM_014438	IL36B	IL36B	interleukin 36 beta	2q14.1	-9.57241	1.46062	1.38532e-23	6.28766e-21
NM_001199505	PHACTR3	PHACTR3	phosphatase and actin regulator 3	20q13.32-q13.33	-9.46227	1.36349	7.19247e-23	2.90967e-20
NM_000927	ABCB1	ABCB1	ATP binding cassette subfamily B member 1	7q21.12	0.535578	4.36272	0.207626	0.730342
NM_012089	ABCB10	ABCB10	ATP binding cassette subfamily B member 10	1q42.13	0.389266	5.05707	0.355772	0.889461
NM_018849	ABCB4	ABCB4	ATP binding cassette subfamily B member 4	7q21.12	0.0182275	-0.612982	1	1
NM_001184832	SLC12A1	SLC12A1	solute carrier family 12 member 1	15q21.1	-9.25806	1.16736	1.47761e-21	5.18808e-19
NM_005689	ABCB6	ABCB6	ATP binding cassette subfamily B member 6 (Langereis blood group)	2q35	0.994047	4.0752	0.020116	0.169461
NM_004299	ABCB7	ABCB7	ATP binding cassette subfamily B member 7	Xq13.3	0.442603	4.27725	0.296514	0.833515
NM_007188	ABCB8	ABCB8	ATP binding cassette subfamily B member 8	7q36.1	-0.538423	5.67029	0.200638	0.716636
NM_001243014	ABCB9	ABCB9	ATP binding cassette subfamily B member 9	12q24.31	-0.583996	2.44333	0.187517	0.693875
NM_019862	ABCC1	ABCC1	ATP binding cassette subfamily C member 1	16p13.11	0.508415	6.68897	0.225476	0.756652
NM_001198934	ABCC10	ABCC10	ATP binding cassette subfamily C member 10	6p21.1	-0.460588	4.71753	0.275897	0.805673
NM_033226	ABCC12	ABCC12	ATP binding cassette subfamily C member 12	16q12.1	-1.06287	-1.22256	0.145377	0.606161
NR_003087	ABCC13	ABCC13	ATP binding cassette subfamily C member 13 (pseudogene)	21q11.2	-0.924744	-3.11018	1	1
NM_000392	ABCC2	ABCC2	ATP binding cassette subfamily C member 2	10q24.2	-0.147631	-0.787584	0.841375	1
NM_001144070	ABCC3	ABCC3	ATP binding cassette subfamily C member 3	17q21.33	0.578101	7.51659	0.16802	0.654391
NM_005845	ABCC4	ABCC4	ATP binding cassette subfamily C member 4	13q32.1	0.376202	6.83532	0.36918	0.900993
NM_173841	IL1RN	IL1RN	interleukin 1 receptor antagonist	2q14.1	-9.23647	1.13647	1.95036e-21	6.4811e-19
NM_025107	MYCT1	MYCT1	MYC target 1	6q25.2	-9.14602	1.04938	7.44376e-21	2.30868e-18
NM_003741	CHRD	CHRD	chordin	3q27.1	-9.03287	2.75782	4.63957e-31	6.64137e-28
NR_023387	ABCC6P2	ABCC6P2	ATP binding cassette subfamily C member 6 pseudogene 2	16p13.11	-0.956013	-1.22868	0.177282	0.67355
NM_000352	ABCC8	ABCC8	ATP binding cassette subfamily C member 8	11p15.1	-3.87351	-2.64311	0.0755461	0.414611
NM_020297	ABCC9	ABCC9	ATP binding cassette subfamily C member 9	12p12.1	-3.89079	-2.63528	0.0755461	0.414611
NM_000033	ABCD1	ABCD1	ATP binding cassette subfamily D member 1	Xq28	-0.926425	4.52803	0.0295163	0.224009
NM_005164	ABCD2	ABCD2	ATP binding cassette subfamily D member 2	12q12	-1.33593	-2.73469	0.639766	1
NM_001122674	ABCD3	ABCD3	ATP binding cassette subfamily D member 3	1p21.3	0.158153	5.86198	0.706701	1
NR_003256	ABCD4	ABCD4	ATP binding cassette subfamily D member 4	14q24.3	-0.0700103	5.79911	0.868248	1
NM_002940	ABCE1	ABCE1	ATP binding cassette subfamily E member 1	4q31.21	0.614449	6.96764	0.143224	0.602044
NM_001025091_3	ABCF1	ABCF1	ATP binding cassette subfamily F member 1	6p21.33	0.34879	6.89555	0.404877	0.921032
NM_005692	ABCF2	ABCF2	ATP binding cassette subfamily F member 2	7q36.1	-0.236165	6.62242	0.572946	1
NM_018358	ABCF3	ABCF3	ATP binding cassette subfamily F member 3	3q27.1	-0.31753	5.56051	0.450092	0.955971
NM_182758	WDR72	WDR72	WD repeat domain 72	15q21.3	-8.97843	0.900949	8.00905e-20	2.16001e-17
NM_001098175	ENTPD1	ENTPD1	ectonucleoside triphosphate diphosphohydrolase 1	10q24.1	-8.90151	2.63059	3.54957e-30	3.16345e-27
NM_022169	ABCG4	ABCG4	ATP binding cassette subfamily G member 4	11q23.3	-2.26783	-2.48127	0.15157	0.618163
NM_032604	ABHD1	ABHD1	abhydrolase domain containing 1	2p23.3	3.14831	-2.82822	0.265211	0.794151
NM_018394	ABHD10	ABHD10	abhydrolase domain containing 10	3q13.2	-0.829333	4.75506	0.0504858	0.325313
NM_001145364	ABHD11	ABHD11	abhydrolase domain containing 11	7q11.23	-1.21292	5.08953	0.00443792	0.0532121
NR_026690	ABHD11-AS1	ABHD11-AS1	ABHD11 antisense RNA 1 (tail to tail)	7q11.23	-0.402601	-1.80911	0.699638	1
NM_015600	ABHD12	ABHD12	abhydrolase domain containing 12	20p11.21	-0.473641	6.12527	0.259401	0.794151
NM_032859	ABHD13	ABHD13	abhydrolase domain containing 13	13q33.3	0.0506885	4.331	0.906432	1
NM_015407	ABHD14A	ABHD14A	abhydrolase domain containing 14A	3p21.2	-0.577785	3.33925	0.178314	0.675018
NR_037192	ABHD14A-ACY1	ABHD14A-ACY1	ABHD14A-ACY1 readthrough	3p21.2	-0.160166	5.85678	0.702962	1
NM_001254753	ABHD14B	ABHD14B	abhydrolase domain containing 14B	3p21.2	-0.754583	5.77288	0.0734603	0.41163
NM_198147	ABHD15	ABHD15	abhydrolase domain containing 15	17q11.2	-0.664657	4.44219	0.117655	0.545995
NM_001177515_6	ABHD16A	ABHD16A	abhydrolase domain containing 16A	6p21.33	-0.216675	5.22469	0.607323	1
NM_080622	ABHD16B	ABHD16B	abhydrolase domain containing 16B	20q13.33	-1.89861	-3.03235	1	1
NM_152924	ABHD2	ABHD2	abhydrolase domain containing 2	15q26.1	0.520719	7.57908	0.21384	0.740343
NM_001253733	RXFP1	RXFP1	relaxin family peptide receptor 1	4q32.1	-8.8997	0.826575	2.43189e-19	5.9546e-17
NM_022060	ABHD4	ABHD4	abhydrolase domain containing 4	14q11.2	-0.0322573	5.56235	0.939746	1
NM_016006	ABHD5	ABHD5	abhydrolase domain containing 5	3p21.33	-0.272649	5.25153	0.517123	0.971043
NM_020676	ABHD6	ABHD6	abhydrolase domain containing 6	3p14.3	-0.894355	3.05121	0.0396467	0.277885
NM_024527	ABHD8	ABHD8	abhydrolase domain containing 8	19p13.11	-0.25968	3.73493	0.542513	0.986337
NM_001178122	ABI1	ABI1	abl interactor 1	10p12.1	0.041453	6.48572	0.921687	1
NM_005759	ABI2	ABI2	abl interactor 2	2q33.2	0.386117	6.14588	0.357502	0.891074
NM_016428	ABI3	ABI3	ABI family member 3	17q21.32	0.73852	-2.82413	1	1
NM_015429	ABI3BP	ABI3BP	ABI family member 3 binding protein	3q12.2	-0.380811	4.61245	0.367624	0.900621
NM_007313	ABL1	ABL1	ABL proto-oncogene 1, non-receptor tyrosine kinase	9q34.12	0.230468	8.01395	0.581433	1
NM_001136000	ABL2	ABL2	ABL proto-oncogene 2, non-receptor tyrosine kinase	1q25.2	-0.49369	6.61849	0.239261	0.777441
NM_002313	ABLIM1	ABLIM1	actin binding LIM protein 1	10q25.3	0.0420661	5.85251	0.921158	1
NM_001130086	ABLIM2	ABLIM2	actin binding LIM protein family member 2	4p16.1	-1.49921	-2.39938	0.327071	0.862969
NM_014945	ABLIM3	ABLIM3	actin binding LIM protein family member 3	5q32	0.752162	8.18259	0.0733112	0.411504
NM_020469	ABO	ABO	ABO, alpha 1-3-N-acetylgalactosaminyltransferase and alpha 1-3-galactosyltransferase	9q34.2	-3.17784	-2.83409	0.265211	0.794151
NM_004411	DYNC1I1	DYNC1I1	dynein cytoplasmic 1 intermediate chain 1	7q21.3	-8.85553	0.780198	4.3223e-19	1.01815e-16
NM_021962	ABR	ABR	ABR, RhoGEF and GTPase activating protein	17p13.3	0.452148	7.64031	0.280204	0.811566
NM_013375	ABT1	ABT1	activator of basal transcription 1	6p22.2	0.31507	4.77498	0.455329	0.95863
NR_033429	ABTB1	ABTB1	ankyrin repeat and BTB domain containing 1	3q21.3	0.0479966	5.15358	0.910536	1
NM_145804	ABTB2	ABTB2	ankyrin repeat and BTB domain containing 2	11p13	0.396629	6.48676	0.344222	0.878063
NM_001607	ACAA1	ACAA1	acetyl-CoA acyltransferase 1	3p22.2	-0.58669	5.7494	0.163227	0.644255
NM_006111	ACAA2	ACAA2	acetyl-CoA acyltransferase 2	18q21.1	0.0252564	6.10043	0.95271	1
NM_198836	ACACA	ACACA	acetyl-CoA carboxylase alpha	17q12	0.240577	6.83748	0.56551	0.998696
NM_001093	ACACB	ACACB	acetyl-CoA carboxylase beta	12q24.11	-1.18333	3.57161	0.00619549	0.0690047
NM_025247	ACAD10	ACAD10	acyl-CoA dehydrogenase family member 10	12q24.12	0.0170116	4.63111	0.969253	1
NM_032169	ACAD11	ACAD11	acyl-CoA dehydrogenase family member 11	3q22.1	-0.000910594	5.07734	0.999352	1
NM_014384	ACAD8	ACAD8	acyl-CoA dehydrogenase family member 8	11q25	-0.11179	4.51576	0.792871	1
NM_014049	ACAD9	ACAD9	acyl-CoA dehydrogenase family member 9	3q21.3	0.0108581	5.97996	0.980098	1
NM_021572	ENPP5	ENPP5	ectonucleotide pyrophosphatase/phosphodiesterase 5 (putative)	6p21.1	-8.84371	0.76303	5.46154e-19	1.25474e-16
NM_000016	ACADM	ACADM	acyl-CoA dehydrogenase medium chain	1p31.1	-0.394037	5.28423	0.349353	0.883063
NM_000017	ACADS	ACADS	acyl-CoA dehydrogenase short chain	12q24.31	-0.0142029	4.24612	0.975736	1
NM_001609	ACADSB	ACADSB	acyl-CoA dehydrogenase short/branched chain	10q26.13	-0.114371	3.81159	0.788971	1
NM_000018	ACADVL	ACADVL	acyl-CoA dehydrogenase very long chain	17p13.1	-0.39546	8.65319	0.344389	0.878149
NM_014716	ACAP1	ACAP1	ArfGAP with coiled-coil, ankyrin repeat and PH domains 1	17p13.1	-0.19658	-0.20785	0.732864	1
NM_012287	ACAP2	ACAP2	ArfGAP with coiled-coil, ankyrin repeat and PH domains 2	3q29	-0.129371	5.40198	0.759034	1
NM_030649	ACAP3	ACAP3	ArfGAP with coiled-coil, ankyrin repeat and PH domains 3	1p36.33	0.187488	5.7813	0.655344	1
NM_000019	ACAT1	ACAT1	acetyl-CoA acetyltransferase 1	11q22.3	-0.662251	6.333	0.115235	0.539066
NM_005891	ACAT2	ACAT2	acetyl-CoA acetyltransferase 2	6q25.3	0.508139	6.47626	0.225744	0.756652
NM_022735	ACBD3	ACBD3	acyl-CoA binding domain containing 3	1q42.12	-0.0333955	5.52461	0.937681	1
NM_001135704	ACBD4	ACBD4	acyl-CoA binding domain containing 4	17q21.31	0.0547663	4.0349	0.902395	1
NM_145698	ACBD5	ACBD5	acyl-CoA binding domain containing 5	10p12.1	-0.034446	5.96694	0.935092	1
NM_032360	ACBD6	ACBD6	acyl-CoA binding domain containing 6	1q25.2-q25.3	-0.220881	5.49839	0.59951	1
NM_001039844	ACBD7	ACBD7	acyl-CoA binding domain containing 7	10p13	0.81981	2.59408	0.0596381	0.362445
NM_001094	ACCN1	ASIC2	acid sensing ion channel subunit 2	17q11.2-q12	0.732831	2.02488	0.0992781	0.488727
NM_001095	ACCN2	ASIC1	acid sensing ion channel subunit 1	12q13.12	0.82183	3.30546	0.055884	0.347939
NM_020321	ACCN3	ASIC3	acid sensing ion channel subunit 3	7q36.1	-1.20827	1.94196	0.00746535	0.0796647
NM_018674	ACCN4	ASIC4	acid sensing ion channel subunit family member 4	2q35	3.1479	-2.8284	0.265211	0.794151
NM_001127219	ACCS	ACCS	1-aminocyclopropane-1-carboxylate synthase homolog (inactive)	11p11.2	-0.447426	3.1011	0.29735	0.835352
NM_022914	ACD	ACD	ACD, shelterin complex subunit and telomerase recruitment factor	16q22.1	-0.252448	5.62755	0.547988	0.987448
NM_000789	ACE	ACE	angiotensin I converting enzyme	17q23.3	1.62399	-2.64551	0.39961	0.91818
NM_152565	ATP6V0D2	ATP6V0D2	ATPase H+ transporting V0 subunit d2	8q21.3	-8.7986	2.52609	1.91415e-29	1.48418e-26
NM_133492	ACER1	ACER1	alkaline ceramidase 1	19p13.3	0.736943	-2.8248	1	1
NM_001010887	ACER2	ACER2	alkaline ceramidase 2	9p22.1	0.218202	-0.0814523	0.702056	1
NM_018367	ACER3	ACER3	alkaline ceramidase 3	11q13.5	-0.174051	4.82895	0.680768	1
NM_000665	ACHE	ACHE	acetylcholinesterase (Cartwright blood group)	7q22.1	-1.67759	-1.86615	0.0897298	0.462688
NM_001164815	ACIN1	ACIN1	apoptotic chromatin condensation inducer 1	14q11.2	0.188609	7.81623	0.651894	1
NM_001096	ACLY	ACLY	ATP citrate lyase	17q21.2	0.173954	9.08634	0.67707	1
NM_000934	SERPINF2	SERPINF2	serpin family F member 2	17p13.3	-8.44842	0.404771	1.18068e-16	2.07276e-14
NM_020186	ACN9	SDHAF3	succinate dehydrogenase complex assembly factor 3	7q21.3	-0.224223	2.42475	0.616515	1
NM_002197	ACO1	ACO1	aconitase 1	9p21.1	-0.324722	7.59172	0.437671	0.948111
NM_001098	ACO2	ACO2	aconitase 2	22q13.2	-0.705849	6.82203	0.0930819	0.471951
NM_001037161	ACOT1	ACOT1	acyl-CoA thioesterase 1	14q24.3	-0.135884	2.15747	0.763853	1
NM_015547	ACOT11	ACOT11	acyl-CoA thioesterase 11	1p32.3	1.26159	-0.815432	0.0338213	0.248472
NM_018473	ACOT13	ACOT13	acyl-CoA thioesterase 13	6p22.3	-0.445461	3.96352	0.294167	0.829757
NR_046028	ACOT2	ACOT2	acyl-CoA thioesterase 2	14q24.3	-0.159088	2.79174	0.71747	1
NM_152331	ACOT4	ACOT4	acyl-CoA thioesterase 4	14q24.3	0.760037	-2.83205	1	1
NM_001037162	ACOT6	ACOT6	acyl-CoA thioesterase 6	14q24.3	-2.21828	-2.99274	1	1
NM_181864	ACOT7	ACOT7	acyl-CoA thioesterase 7	1p36.31	-0.733185	7.10605	0.0810854	0.434096
NM_005469	ACOT8	ACOT8	acyl-CoA thioesterase 8	20q13.12	-0.195574	3.84436	0.648131	1
NM_001037171	ACOT9	ACOT9	acyl-CoA thioesterase 9	Xp22.11	0.163176	6.30505	0.697519	1
NM_007292	ACOX1	ACOX1	acyl-CoA oxidase 1	17q25.1	-0.196219	4.7528	0.642814	1
NM_145027	KIF6	KIF6	kinesin family member 6	6p21.2	-8.41436	0.371788	1.84197e-16	3.08804e-14
NM_001101667	ACOX3	ACOX3	acyl-CoA oxidase 3, pristanoyl	4p16.1	0.43198	4.20013	0.308188	0.849402
NM_001142807	ACOXL	ACOXL	acyl-CoA oxidase like	2q13	-1.89861	-3.03235	1	1
NR_024080	ACP1	ACP1	acid phosphatase 1	2p25.3	0.25375	6.08824	0.545368	0.986388
NM_001610	ACP2	ACP2	acid phosphatase 2, lysosomal	11p11.2	0.0179663	5.42148	0.967359	1
NM_014461	CNTN6	CNTN6	contactin 6	3p26.3	-8.35334	2.09237	1.88029e-26	1.12872e-23
NM_016361	ACP6	ACP6	acid phosphatase 6, lysophosphatidic	1q21.2	-0.468598	3.86878	0.272211	0.804004
NM_152282	ACPL2	PXYLP1	2-phosphoxylose phosphatase 1	3q23	-0.81148	1.23272	0.0801795	0.430858
NM_001134194	ACPP	ACPP	acid phosphatase, prostate	3q22.1	-3.20722	-2.82164	0.265211	0.794151
NM_033068	ACPT	ACP4	acid phosphatase 4	19q13.33	1.85579	-3.03482	1	1
NM_032489	ACRBP	ACRBP	acrosin binding protein	12p13.31	0.554619	-0.751126	0.435713	0.947219
NM_052957	ACRC	GCNA	germ cell nuclear acidic peptidase	Xq13.1	0.516586	0.995811	0.286401	0.820071
NM_020069	ACRV1	ACRV1	acrosomal vesicle protein 1	11q24.2	-3.19701	-2.82587	0.265211	0.794151
NM_030924	ACSBG2	ACSBG2	acyl-CoA synthetase bubblegum family member 2	19p13.3	-1.90344	-3.0303	1	1
NM_025149	ACSF2	ACSF2	acyl-CoA synthetase family member 2	17q21.33	-0.422302	3.20751	0.32615	0.862969
NM_174917	ACSF3	ACSF3	acyl-CoA synthetase family member 3	16q24.3	-0.000592555	4.5851	1	1
NM_198392	TCF21	TCF21	transcription factor 21	6q23.2	-8.32701	2.83992	1.56021e-30	1.613e-27
NM_203372	ACSL3	ACSL3	acyl-CoA synthetase long chain family member 3	2q36.1	-0.13851	6.86719	0.740893	1
NM_022977	ACSL4	ACSL4	acyl-CoA synthetase long chain family member 4	Xq23	-0.395382	7.44631	0.344888	0.8787
NM_203379	ACSL5	ACSL5	acyl-CoA synthetase long chain family member 5	10q25.2	-0.304908	4.52513	0.470288	0.967235
NM_001205250	ACSL6	ACSL6	acyl-CoA synthetase long chain family member 6	5q31.1	2.64154	-2.92801	0.51014	0.967235
NM_052956	ACSM1	ACSM1	acyl-CoA synthetase medium chain family member 1	16p12.3	-0.696006	-1.70448	0.574937	1
NM_001185100	CD22	CD22	CD22 molecule	19q13.12	-8.31584	0.276968	6.28753e-16	1.00004e-13
NM_001105069	ACSM2B	ACSM2B	acyl-CoA synthetase medium chain family member 2B	16p12.3	3.46016	-2.28033	0.00737888	0.0789612
NM_001546	ID4	ID4	inhibitor of DNA binding 4, HLH protein	6p22.3	-8.07537	1.82204	1.38095e-24	7.34229e-22
NM_017888	ACSM5	ACSM5	acyl-CoA synthetase medium chain family member 5	16p12.3	0.649535	-1.29359	0.401327	0.919186
NM_001252677	ACSS1	ACSS1	acyl-CoA synthetase short chain family member 1	20p11.21	-0.322633	3.52102	0.452563	0.956458
NM_001242393	ACSS2	ACSS2	acyl-CoA synthetase short chain family member 2	20q11.22	-0.527366	5.14581	0.211053	0.736589
NM_002084	GPX3	GPX3	glutathione peroxidase 3	5q33.1	-8.06088	8.47756	5.48028e-45	3.39942e-41
NM_001100	ACTA1	ACTA1	actin, alpha 1, skeletal muscle	1q42.13	0.308077	4.45044	0.467273	0.967235
NM_001141945	ACTA2	ACTA2	actin, alpha 2, smooth muscle, aorta	10q23.31	-0.560334	3.60307	0.190002	0.699177
NM_001101	ACTB	ACTB	actin beta	7p22.1	0.271941	12.9736	0.514937	0.969689
NM_001017992	ACTBL2	ACTBL2	actin, beta like 2	5q11.2	0.187325	2.82203	0.668545	1
NM_005159	ACTC1	ACTC1	actin, alpha, cardiac muscle 1	15q14	0.195328	-1.69445	1	1
NR_037688	ACTG1	ACTG1	actin gamma 1	17q25.3	0.549077	12.453	0.189582	0.698599
NM_001199893	ACTG2	ACTG2	actin, gamma 2, smooth muscle, enteric	2p13.1	-1.069	-2.77595	1	1
NM_173170	IL36RN	IL36RN	interleukin 36 receptor antagonist	2q14.1	-7.98981	-0.0276104	3.83199e-14	4.72249e-12
NM_177989	ACTL6A	ACTL6A	actin like 6A	3q26.33	0.0398126	6.53302	0.92473	1
NM_006687	ACTL7A	ACTL7A	actin like 7A	9q31.3	0.726945	-3.12029	1	1
NM_006686	ACTL7B	ACTL7B	actin like 7B	9q31.3	1.85579	-3.03482	1	1
NM_030812	ACTL8	ACTL8	actin like 8	1p36.13	-0.848831	-2.82021	1	1
NM_001102	ACTN1	ACTN1	actinin alpha 1	14q24.1	0.898169	10.3468	0.0327576	0.24238
NM_014298	QPRT	QPRT	quinolinate phosphoribosyltransferase	16p11.2	-7.97889	5.07147	1.99653e-39	6.26953e-36
NM_001104	ACTN3	ACTN3	actinin alpha 3 (gene/pseudogene)	11q13.2	0.581702	-2.77395	1	1
NM_004924	ACTN4	ACTN4	actinin alpha 4	19q13.2	0.244757	10.8087	0.557822	0.992495
NM_018477	ACTR10	ACTR10	actin related protein 10 homolog	14q23.1	0.217871	5.76409	0.604086	1
NM_005736	ACTR1A	ACTR1A	ARP1 actin related protein 1 homolog A	10q24.32	-0.217887	7.5039	0.602438	1
NM_005735	ACTR1B	ACTR1B	ARP1 actin related protein 1 homolog B	2q11.2	0.537987	6.62455	0.1999	0.715006
NM_005722	ACTR2	ACTR2	ARP2 actin related protein 2 homolog	2p14	0.487139	8.51657	0.24451	0.784078
NM_005721	ACTR3	ACTR3	ARP3 actin related protein 3 homolog	2q14.1	0.277731	8.52779	0.506368	0.967235
NM_020445	ACTR3B	ACTR3B	ARP3 actin related protein 3 homolog B	7q36.1-q36.2	-0.121832	2.83006	0.786129	1
NM_001164458	ACTR3C	ACTR3C	ARP3 actin related protein 3 homolog C	7q36.1	-0.663494	1.92378	0.14114	0.597605
NM_024855	ACTR5	ACTR5	ARP5 actin related protein 5 homolog	20q11.23	-0.126524	3.72405	0.768628	1
NM_022496	ACTR6	ACTR6	ARP6 actin related protein 6 homolog	12q23.1	-0.0526992	4.16225	0.903825	1
NM_022899	ACTR8	ACTR8	ARP8 actin related protein 8 homolog	3p21.1	-0.0904914	4.97328	0.831085	1
NM_001111067	ACVR1	ACVR1	activin A receptor type 1	2q24.1	-0.353344	5.24015	0.401637	0.919319
NM_020328	ACVR1B	ACVR1B	activin A receptor type 1B	12q13.13	-0.705599	6.49991	0.0934026	0.471951
NM_145259	ACVR1C	ACVR1C	activin A receptor type 1C	2q24.1	-1.45131	-0.255849	0.00844206	0.0876665
NM_001616	ACVR2A	ACVR2A	activin A receptor type 2A	2q22.3-q23.1	0.179837	2.63395	0.686952	1
NM_001106	ACVR2B	ACVR2B	activin A receptor type 2B	3p22.2	0.719207	3.81514	0.0916508	0.469843
NM_002510	GPNMB	GPNMB	glycoprotein nmb	7p15.3	-7.91894	7.33749	3.54065e-43	1.6472e-39
NM_001198895	ACY1	ACY1	aminoacylase 1	3p21.2	-0.136974	5.77298	0.744535	1
NM_001107	ACYP1	ACYP1	acylphosphatase 1	14q24.3	-0.191218	3.25941	0.660988	1
NM_138448	ACYP2	ACYP2	acylphosphatase 2	2p16.2	-0.736514	2.36388	0.0942366	0.472947
NM_000022	ADA	ADA	adenosine deaminase	20q13.12	-0.701422	1.18328	0.139705	0.59563
NM_001012969	ADAL	ADAL	adenosine deaminase like	15q15.3	-0.117938	3.39719	0.787098	1
NR_036636	ADAM1	ADAM1A	ADAM metallopeptidase domain 1A (pseudogene)	12q24.12-q24.13	-0.124752	2.75749	0.782823	1
NM_001110	ADAM10	ADAM10	ADAM metallopeptidase domain 10	15q21.3	0.692711	7.44139	0.0989788	0.48792
NM_002390	ADAM11	ADAM11	ADAM metallopeptidase domain 11	17q21.31	0.191785	-0.220529	0.78271	1
NM_003474	ADAM12	ADAM12	ADAM metallopeptidase domain 12	10q26.2	1.04434	6.17232	0.0135622	0.126253
NM_207197	ADAM15	ADAM15	ADAM metallopeptidase domain 15	1q21.3	-0.120607	7.60217	0.773069	1
NM_003183	ADAM17	ADAM17	ADAM metallopeptidase domain 17	2p25.1	0.626582	5.53734	0.136966	0.59563
NM_014237	ADAM18	ADAM18	ADAM metallopeptidase domain 18	8p11.22	-0.0480961	-2.92386	1	1
NM_033274	ADAM19	ADAM19	ADAM metallopeptidase domain 19	5q33.3	1.1493	5.69361	0.00676035	0.0740455
NM_003814	ADAM20	ADAM20	ADAM metallopeptidase domain 20	14q24.2	-1.37747	-2.20241	0.275809	0.805607
NM_003813	ADAM21	ADAM21	ADAM metallopeptidase domain 21	14q24.2	-0.264966	-2.15418	1	1
NR_003951	ADAM21P1	ADAM21P1	ADAM metallopeptidase domain 21 pseudogene 1	14q24.2	1.91553	-2.78336	0.265211	0.794151
NM_021722	ADAM22	ADAM22	ADAM metallopeptidase domain 22	7q21.12	0.077504	0.699785	0.909542	1
NM_003812	ADAM23	ADAM23	ADAM metallopeptidase domain 23	2q33.3	-1.35186	-2.21295	0.275809	0.805607
NM_014265	ADAM28	ADAM28	ADAM metallopeptidase domain 28	8p21.2	-0.886416	-0.903786	0.196191	0.708229
NM_145004	ADAM32	ADAM32	ADAM metallopeptidase domain 32	8p11.22	1.53903	-0.472271	0.00854025	0.0884393
NM_153202	ADAM33	ADAM33	ADAM metallopeptidase domain 33	20p13	-0.551245	-2.64777	1	1
NM_001109	ADAM8	ADAM8	ADAM metallopeptidase domain 8	10q26.3	-0.0586623	3.47574	0.893668	1
NM_004321	KIF1A	KIF1A	kinesin family member 1A	2q37.3	-7.81718	-0.181073	2.67624e-13	2.91241e-11
NM_006988	ADAMTS1	ADAMTS1	ADAM metallopeptidase with thrombospondin type 1 motif 1	21q21.3	0.569249	8.10712	0.17433	0.666959
NM_030957	ADAMTS10	ADAMTS10	ADAM metallopeptidase with thrombospondin type 1 motif 10	19p13.2	1.69749	-2.03247	0.0935584	0.471951
NM_030955	ADAMTS12	ADAMTS12	ADAM metallopeptidase with thrombospondin type 1 motif 12	5p13.3-p13.2	-0.168381	1.35283	0.749037	1
NR_024514	ADAMTS13	ADAMTS13	ADAM metallopeptidase with thrombospondin type 1 motif 13	9q34.2	-1.23965	1.58297	0.00732975	0.0789612
NM_004664	LIN7A	LIN7A	lin-7 homolog A, crumbs cell polarity complex component	12q21.31	-7.73835	1.49652	2.22127e-22	8.61159e-20
NM_005218	DEFB1	DEFB1	defensin beta 1	8p23.1	-7.72099	-0.251682	9.30602e-13	9.56629e-11
NM_139056	ADAMTS16	ADAMTS16	ADAM metallopeptidase with thrombospondin type 1 motif 16	5p15.32	0.907871	0.974222	0.0520265	0.331903
NM_139057	ADAMTS17	ADAMTS17	ADAM metallopeptidase with thrombospondin type 1 motif 17	15q26.3	1.08817	-2.10726	0.325232	0.862969
NR_024357	LINC00113	LINC00113	long intergenic non-protein coding RNA 113	21q21.3	-7.71183	-0.270492	9.30602e-13	9.56629e-11
NM_001098498	SGSM1	SGSM1	small G protein signaling modulator 1	22q11.23	-7.70741	-0.264645	1.15281e-12	1.15337e-10
NM_014244	ADAMTS2	ADAMTS2	ADAM metallopeptidase with thrombospondin type 1 motif 2	5q35.3	-3.59064	-2.72452	0.140359	0.59563
NM_014243	ADAMTS3	ADAMTS3	ADAM metallopeptidase with thrombospondin type 1 motif 3	4q13.3	0.38106	3.66578	0.372578	0.90442
NM_005099	ADAMTS4	ADAMTS4	ADAM metallopeptidase with thrombospondin type 1 motif 4	1q23.3	-0.824092	-2.83045	1	1
NM_007038	ADAMTS5	ADAMTS5	ADAM metallopeptidase with thrombospondin type 1 motif 5	21q21.3	0.571848	3.5539	0.178278	0.675018
NM_000091	COL4A3	COL4A3	collagen type IV alpha 3 chain	2q36.3	-7.70487	4.98709	5.58324e-38	1.48426e-34
NM_001256317	TMPRSS3	TMPRSS3	transmembrane serine protease 3	21q22.3	-7.69579	-0.273057	1.43084e-12	1.4041e-10
NM_182920	ADAMTS9	ADAMTS9	ADAM metallopeptidase with thrombospondin type 1 motif 9	3p14.1	-1.08424	5.24001	0.0107103	0.105121
NR_038264	ADAMTS9-AS2	ADAMTS9-AS2	ADAMTS9 antisense RNA 2	3p14.1	1.25845	1.39852	0.00676453	0.0740477
NM_052866	ADAMTSL1	ADAMTSL1	ADAMTS like 1	9p22.2-p22.1	0.98148	4.0475	0.0217456	0.17985
NM_001145320	ADAMTSL2	ADAMTSL2	ADAMTS like 2	9q34.2	-1.89861	-3.03235	1	1
NM_001111036	ACP5	ACP5	acid phosphatase 5, tartrate resistant	19p13.2	-7.5606	3.24929	6.85777e-31	8.50071e-28
NM_019844	SLCO1B3	SLCO1B3	solute carrier organic anion transporter family member 1B3	12p12.2	-7.5083	-0.398973	1.09722e-11	1.02604e-09
NM_213604	ADAMTSL5	ADAMTSL5	ADAMTS like 5	19p13.3	-0.21473	3.99157	0.615575	1
NM_006869	ADAP1	ADAP1	ArfGAP with dual PH domains 1	7p22.3	0.463825	-2.26346	0.7762	1
NM_018404	ADAP2	ADAP2	ArfGAP with dual PH domains 2	17q11.2	0.343635	1.23484	0.473318	0.967235
NM_015840	ADAR	ADAR	adenosine deaminase, RNA specific	1q21.3	0.0566315	8.13389	0.892332	1
NM_015833	ADARB1	ADARB1	adenosine deaminase, RNA specific B1	21q22.3	-0.269734	2.96	0.534126	0.983369
NR_036460	ADAT1	ADAT1	adenosine deaminase, tRNA specific 1	16q23.1	0.0884369	4.30286	0.835855	1
NM_182503	ADAT2	ADAT2	adenosine deaminase, tRNA specific 2	6q24.2	-0.292625	3.91103	0.492005	0.967235
NM_138422	ADAT3	ADAT3	adenosine deaminase, tRNA specific 3	19p13.3	-0.0841668	2.59844	0.848746	1
NM_052998	ADC	AZIN2	antizyme inhibitor 2	1p35.1	-0.622856	2.35128	0.159782	0.63701
NM_001142545	ADCK1	ADCK1	aarF domain containing kinase 1	14q24.3	-1.22351	2.64661	0.00556078	0.0630211
NM_052853	ADCK2	ADCK2	aarF domain containing kinase 2	7q34	-0.601076	4.82039	0.154902	0.625831
NM_020247	ADCK3	COQ8A	coenzyme Q8A	1q42.13	0.108271	3.72723	0.802988	1
NM_001142555	ADCK4	COQ8B	coenzyme Q8B	19q13.2	-0.145837	4.72107	0.730601	1
NM_174922	ADCK5	ADCK5	aarF domain containing kinase 5	8q24.3	-0.0935612	3.89725	0.827716	1
NM_021116	ADCY1	ADCY1	adenylate cyclase 1	7p12.3	1.04476	-0.688517	0.108563	0.518712
NM_018417	ADCY10	ADCY10	adenylate cyclase 10	1q24.2	0.815872	-1.73816	0.347711	0.881547
NM_004036	ADCY3	ADCY3	adenylate cyclase 3	2p23.3	0.450772	6.10959	0.283023	0.815289
NM_139247	ADCY4	ADCY4	adenylate cyclase 4	14q12	-2.91231	-2.22942	0.0219525	0.180678
NM_001199642	ADCY5	ADCY5	adenylate cyclase 5	3q21.1	-2.35335	-2.06789	0.0276024	0.213844
NM_015270	ADCY6	ADCY6	adenylate cyclase 6	12q13.12	0.276312	6.77896	0.509418	0.967235
NM_001114	ADCY7	ADCY7	adenylate cyclase 7	16q12.1	0.140666	5.50841	0.738771	1
NM_001115	ADCY8	ADCY8	adenylate cyclase 8	8q24.22	-1.88266	-3.03879	1	1
NM_001116	ADCY9	ADCY9	adenylate cyclase 9	16p13.3	-0.344826	4.00915	0.416921	0.931839
NM_170696	ALDH1A2	ALDH1A2	aldehyde dehydrogenase 1 family member A2	15q21.3	-7.4217	4.52149	4.74272e-35	1.10322e-31
NM_001119	ADD1	ADD1	adducin 1	4p16.3	0.500619	7.89106	0.231941	0.76869
NM_017488	ADD2	ADD2	adducin 2	2p13.3	0.217636	-2.21922	1	1
NM_019903	ADD3	ADD3	adducin 3	10q25.1-q25.2	1.17102	6.93184	0.00571411	0.0644058
NM_000668	ADH1B	ADH1B	alcohol dehydrogenase 1B (class I), beta polypeptide	4q23	-2.69711	-2.92226	0.51014	0.967235
NM_001164586	IGFN1	IGFN1	immunoglobulin-like and fibronectin type III domain containing 1	1q32.1	-7.33429	7.24153	2.02145e-39	6.26953e-36
NM_000671	ADH5	ADH5	alcohol dehydrogenase 5 (class III), chi polypeptide	4q23	0.126294	7.24393	0.762897	1
NM_021244	RRAGD	RRAGD	Ras related GTP binding D	6q15	-7.33132	3.65512	8.02324e-32	1.49305e-28
NM_144650	ADHFE1	ADHFE1	alcohol dehydrogenase, iron containing 1	8q13.1	-0.180886	2.09724	0.698527	1
NM_018269	ADI1	ADI1	acireductone dioxygenase 1	2p25.3	0.0753538	5.6739	0.858263	1
NM_004797	ADIPOQ	ADIPOQ	adiponectin, C1Q and collagen domain containing	3q27.3	-1.15571	-3.01127	1	1
NR_046083	ADIPOR1	ADIPOR1	adiponectin receptor 1	1q32.1	-0.151514	6.58953	0.717718	1
NM_024551	ADIPOR2	ADIPOR2	adiponectin receptor 2	12p13.33	0.626754	6.63576	0.13554	0.593975
NM_006721	ADK	ADK	adenosine kinase	10q22.2	0.234151	5.7221	0.577383	1
NM_001124	ADM	ADM	adrenomedullin	11p15.4	0.785219	6.5038	0.0621496	0.372238
NM_024866	ADM2	ADM2	adrenomedullin 2	22q13.33	0.86171	0.680243	0.0714903	0.404611
NM_015339	ADNP	ADNP	activity dependent neuroprotector homeobox	20q13.13	0.295749	6.6269	0.480152	0.967235
NM_014913	ADNP2	ADNP2	ADNP homeobox 2	18q23	0.441059	5.72259	0.294075	0.829757
NM_032804	ADO	ADO	2-aminoethanethiol dioxygenase	10q21.3	-0.0788738	5.47623	0.851796	1
NM_000674	ADORA1	ADORA1	adenosine A1 receptor	1q32.1	-0.50416	4.64297	0.233387	0.770653
NM_000675	ADORA2A	ADORA2A	adenosine A2a receptor	22q11.23	0.177164	-0.421511	0.753012	1
NM_000676	ADORA2B	ADORA2B	adenosine A2b receptor	17p12	-0.0748007	3.91095	0.866467	1
NR_023318	ADPGK	ADPGK	ADP dependent glucokinase	15q24.1	0.12156	6.06437	0.772386	1
NM_001125	ADPRH	ADPRH	ADP-ribosylarginine hydrolase	3q13.33	0.0401136	2.12294	0.941799	1
NM_199162	ADPRHL1	ADPRHL1	ADP-ribosylhydrolase like 1	13q34	0.0766756	-0.146965	0.947725	1
NM_017825	ADPRHL2	ADPRHL2	ADP-ribosylhydrolase like 2	1p34.3	0.0668294	5.95685	0.874163	1
NM_000679	ADRA1B	ADRA1B	adrenoceptor alpha 1B	5q33.3	0.158408	2.93702	0.71732	1
NM_000678	ADRA1D	ADRA1D	adrenoceptor alpha 1D	20p13	3.81798	-2.64831	0.0755461	0.414611
NM_000681	ADRA2A	ADRA2A	adrenoceptor alpha 2A	10q25.2	-2.69477	-2.92327	0.51014	0.967235
NM_000682	ADRA2B	ADRA2B	adrenoceptor alpha 2B	2q11.2	1.85579	-3.03482	1	1
NM_001256430	STON2	STON2	stonin 2	14q31.1	-7.22205	1.87393	7.43997e-24	3.55001e-21
NM_000025	ADRB3	ADRB3	adrenoceptor beta 3	8p11.23	-1.90344	-3.0303	1	1
NM_001619	ADRBK1	GRK2	G protein-coupled receptor kinase 2	11q13.2	-0.200093	6.3332	0.633159	1
NM_005160	ADRBK2	GRK3	G protein-coupled receptor kinase 3	22q12.1	1.47851	-0.676728	0.0161488	0.143723
NM_175573	ADRM1	ADRM1	adhesion regulating molecule 1	20q13.33	-0.249294	7.16047	0.551445	0.989204
NM_001123378	ADSL	ADSL	adenylosuccinate lyase	22q13.1	0.196349	6.65061	0.63919	1
NM_001126	ADSS	ADSS	adenylosuccinate synthase	1q44	-0.255462	6.1619	0.542487	0.986337
NM_152328	ADSSL1	ADSSL1	adenylosuccinate synthase like 1	14q32.33	-1.07973	0.683899	0.0287057	0.219378
NM_032744	ADTRP	ADTRP	androgen dependent TFPI regulating protein	6p24.1	-0.0925787	2.84027	0.836289	1
NM_001129	AEBP1	AEBP1	AE binding protein 1	7p13	-2.69477	-2.92327	0.51014	0.967235
NM_153207	AEBP2	AEBP2	AE binding protein 2	12p12.3	0.665987	4.89274	0.114991	0.538059
NM_022767	AEN	AEN	apoptosis enhancing nuclease	15q26.1	0.017347	5.10019	0.968174	1
NM_198970	AES	AES	amino-terminal enhancer of split	19p13.3	-0.00421558	8.63117	0.992081	1
NM_198595	AFAP1	AFAP1	actin filament associated protein 1	4p16.1	0.81854	4.73802	0.053605	0.337919
NR_026892	AFAP1-AS1	AFAP1-AS1	AFAP1 antisense RNA 1	4p16.1	-0.744084	-2.92678	1	1
NM_152406	AFAP1L1	AFAP1L1	actin filament associated protein 1 like 1	5q32	0.309931	5.92882	0.460088	0.962487
NM_001001936	AFAP1L2	AFAP1L2	actin filament associated protein 1 like 2	10q25.3	1.14866	7.12946	0.00666571	0.0732676
NM_001166693	AFF1	AFF1	AF4/FMR2 family member 1	4q21.3-q22.1	-0.66514	6.95725	0.113274	0.532033
NM_001169123	AFF2	AFF2	AF4/FMR2 family member 2	Xq28	-1.45536	-1.96663	0.172604	0.663802
NM_201553	FGL1	FGL1	fibrinogen like 1	8p22	-7.14097	-0.744079	5.07049e-10	3.6014e-08
NM_014423	AFF4	AFF4	AF4/FMR2 family member 4	5q31.1	0.203077	7.11507	0.627397	1
NR_003226	AFG3L1P	AFG3L1P	AFG3 like matrix AAA peptidase subunit 1, pseudogene	16q24.3	0.0581283	5.211	0.891016	1
NM_006796	AFG3L2	AFG3L2	AFG3 like matrix AAA peptidase subunit 2	18p11.21	-0.379718	6.5725	0.364976	0.899821
NM_001010982	AFMID	AFMID	arylformamidase	17q25.3	0.811112	3.92441	0.0577819	0.354404
NM_001134	AFP	AFP	alpha fetoprotein	4q13.3	0.175638	-0.734162	0.923787	1
NM_001002243	AFTPH	AFTPH	aftiphilin	2p14	-0.0724976	4.97978	0.86474	1
NM_001171988	AGA	AGA	aspartylglucosaminidase	4q34.3	0.124755	4.54206	0.770058	1
NM_014914	AGAP1	AGAP1	ArfGAP with GTPase domain, ankyrin repeat and PH domain 1	2q37.2	0.451441	5.34795	0.283561	0.816081
NM_133447	AGAP11	AGAP11	ArfGAP with GTPase domain, ankyrin repeat and PH domain 11	10q23.2	-0.150064	0.321222	0.807776	1
NM_014770	AGAP2	AGAP2	ArfGAP with GTPase domain, ankyrin repeat and PH domain 2	12q14.1	-0.440084	-0.515078	0.450541	0.9561
NM_031946	AGAP3	AGAP3	ArfGAP with GTPase domain, ankyrin repeat and PH domain 3	7q36.1	-0.369609	6.85816	0.377609	0.906715
NM_133446	AGAP4	AGAP4	ArfGAP with GTPase domain, ankyrin repeat and PH domain 4	10q11.22	-0.338374	2.04261	0.447616	0.953997
NM_001144000	AGAP5	AGAP5	ArfGAP with GTPase domain, ankyrin repeat and PH domain 5	10q22.2	-0.408812	2.1914	0.362364	0.896669
NM_001077665	AGAP6	AGAP6	ArfGAP with GTPase domain, ankyrin repeat and PH domain 6	10q11.23	-0.389822	3.55015	0.363357	0.898054
NM_001077685	AGAP7	AGAP7P	ArfGAP with GTPase domain, ankyrin repeat and PH domain 7, pseudogene	10q11.22	-0.232362	2.3044	0.604408	1
NM_001077686	AGAP8	AGAP4	ArfGAP with GTPase domain, ankyrin repeat and PH domain 4	10q11.22	-0.246851	2.24961	0.58183	1
NM_001190810_1	AGAP9	AGAP9	ArfGAP with GTPase domain, ankyrin repeat and PH domain 9	10q11.22	-0.311693	3.13157	0.474269	0.967235
NM_024783	AGBL2	AGBL2	ATP/GTP binding protein like 2	11p11.2	-0.873472	1.06758	0.0652342	0.382224
NM_178563	AGBL3	AGBL3	ATP/GTP binding protein like 3	7q33	-0.164331	0.548776	0.768358	1
NM_032785	AGBL4	AGBL4	ATP/GTP binding protein like 4	1p33	1.85655	-3.0345	1	1
NM_001035507	AGBL5	AGBL5	ATP/GTP binding protein like 5	2p23.3	0.5348	5.16826	0.20444	0.725206
NM_001206966	AGER	AGER	advanced glycosylation end-product specific receptor	6p21.32	0.946663	2.84855	0.0299794	0.226784
NM_001135188	AGFG1	AGFG1	ArfGAP with FG repeats 1	2q36.3	0.560932	6.35585	0.181645	0.682323
NM_006076	AGFG2	AGFG2	ArfGAP with FG repeats 2	7q22.1	-0.900484	4.01498	0.0352486	0.254932
NM_018046	AGGF1	AGGF1	angiogenic factor with G-patch and FHA domains 1	5q13.3	0.347426	5.3613	0.408705	0.924242
NM_018238	AGK	AGK	acylglycerol kinase	7q34	-0.517241	5.2174	0.219708	0.744982
NM_000642	AGL	AGL	amylo-alpha-1, 6-glucosidase, 4-alpha-glucanotransferase	1p21.2	0.221202	4.92324	0.60016	1
NM_024758	AGMAT	AGMAT	agmatinase	1p36.21	1.85535	-3.03501	1	1
NM_001004320	AGMO	AGMO	alkylglycerol monooxygenase	7p21.2	-0.807694	-2.83617	1	1
NM_032741	AGPAT1	AGPAT1	1-acylglycerol-3-phosphate O-acyltransferase 1	6p21.32	0.164344	6.34335	0.695033	1
NM_006412	AGPAT2	AGPAT2	1-acylglycerol-3-phosphate O-acyltransferase 2	9q34.3	-0.211139	6.24237	0.614605	1
NM_020132	AGPAT3	AGPAT3	1-acylglycerol-3-phosphate O-acyltransferase 3	21q22.3	0.0863203	7.21763	0.836702	1
NM_020133	AGPAT4	AGPAT4	1-acylglycerol-3-phosphate O-acyltransferase 4	6q26	-0.006451	5.60515	0.989156	1
NR_024277	AGPAT4-IT1	AGPAT4-IT1	AGPAT4 intronic transcript 1	6q26	-0.676387	1.16811	0.152248	0.619681
NM_018361	AGPAT5	AGPAT5	1-acylglycerol-3-phosphate O-acyltransferase 5	8p23.1	0.410651	5.8201	0.328206	0.86362
NM_178819	AGPAT6	GPAT4	glycerol-3-phosphate acyltransferase 4	8p11.21	0.240045	6.91781	0.566307	0.999066
NM_001256422	AGPAT9	GPAT3	glycerol-3-phosphate acyltransferase 3	4q21.23	-0.117866	4.96852	0.780904	1
NM_153237	C9orf71	TMEM252	transmembrane protein 252	9q21.11	-7.10591	0.892391	2.00736e-18	4.1972e-16
NM_003659	AGPS	AGPS	alkylglycerone phosphate synthase	2q31.2	0.474328	6.82554	0.257862	0.794151
NM_001011709	PNLIPRP3	PNLIPRP3	pancreatic lipase related protein 3	10q25.3	-7.09705	1.63381	3.00047e-22	1.11672e-19
NM_198576	AGRN	AGRN	agrin	1p36.33	0.619501	11.0868	0.139202	0.59563
NM_001138	AGRP	AGRP	agouti related neuropeptide	16q22.1	2.64039	-2.92851	0.51014	0.967235
NR_026811	AGSK1	GOLGA2P10	golgin A2 pseudogene 10	15q25.2	0.662975	4.85014	0.116677	0.542945
NM_181643	C1orf88	PIFO	primary cilia formation	1p13.2	-7.04188	-0.83384	1.18153e-09	7.85256e-08
NM_015239	AGTPBP1	AGTPBP1	ATP/GTP binding protein 1	9q21.33	-0.0242316	5.12108	0.95537	1
NM_001030019	SUN3	SUN3	Sad1 and UNC84 domain containing 3	7p12.3	-7.01105	2.7025	4.53089e-27	3.01126e-24
NM_000030	AGXT	AGXT	alanine-glyoxylate aminotransferase	2q37.3	-4.16238	-2.54108	0.0229403	0.185403
NM_031900	AGXT2	AGXT2	alanine--glyoxylate aminotransferase 2	5p13.2	-1.89861	-3.03235	1	1
NM_153373	AGXT2L2	PHYKPL	5-phosphohydroxy-L-lysine phospho-lyase	5q35.3	0.319566	4.42261	0.450932	0.9561
NM_015446	AHCTF1	AHCTF1	AT-hook containing transcription factor 1	1q44	-0.0853114	6.21107	0.839206	1
NM_001161766	AHCY	AHCY	adenosylhomocysteinase	20q11.22	-0.0551775	7.72011	0.895181	1
NM_006621	AHCYL1	AHCYL1	adenosylhomocysteinase like 1	1p13.3	0.262304	7.6115	0.530593	0.981394
NM_015328	AHCYL2	AHCYL2	adenosylhomocysteinase like 2	7q32.1	-0.78561	4.17521	0.0653823	0.38261
NM_001029882	AHDC1	AHDC1	AT-hook DNA binding motif containing 1	1p36.11-p35.3	0.648521	5.32549	0.123959	0.564
NM_017651	AHI1	AHI1	Abelson helper integration site 1	6q23.3	-0.576989	4.56704	0.17303	0.664494
NM_024060	AHNAK	AHNAK	AHNAK nucleoprotein	11q12.3	0.803394	10.9868	0.0557672	0.347601
NM_138420	AHNAK2	AHNAK2	AHNAK nucleoprotein 2	14q32.33	-1.12081	7.49844	0.00805487	0.0844468
NM_001621	AHR	AHR	aryl hydrocarbon receptor	7p21.1	0.181482	5.80896	0.665395	1
NM_020731	AHRR	AHRR	aryl-hydrocarbon receptor repressor	5p15.33	-0.407967	2.61685	0.35493	0.889207
NM_012111	AHSA1	AHSA1	activator of HSP90 ATPase activity 1	14q24.3	-0.237283	6.6018	0.571186	1
NM_152392	AHSA2	AHSA2P	activator of HSP90 ATPase homolog 2, pseudogene	2p15	0.541384	6.26693	0.197429	0.709883
NM_001622	AHSG	AHSG	alpha 2-HS glycoprotein	3q27.3	-1.90344	-3.0303	1	1
NM_020661	AICDA	AICDA	activation induced cytidine deaminase	12p13.31	0.192925	0.0421275	0.726658	1
NM_022831	AIDA	AIDA	axin interactor, dorsalization associated	1q41	0.0628534	7.24125	0.8808	1
NM_000834	GRIN2B	GRIN2B	glutamate ionotropic receptor NMDA type subunit 2B	12p13.1	-6.99466	-0.848578	2.11241e-09	1.33707e-07
NM_145812	AIFM1	AIFM1	apoptosis inducing factor mitochondria associated 1	Xq26.1	-1.13844	5.57196	0.00735464	0.0789612
NM_032797	AIFM2	AIFM2	apoptosis inducing factor, mitochondria associated 2	10q22.1	0.28404	5.11827	0.500134	0.967235
NM_001018060	AIFM3	AIFM3	apoptosis inducing factor, mitochondria associated 3	22q11.21	-2.18604	-2.14222	0.0632029	0.375045
NM_016108	AIG1	AIG1	androgen induced 1	6q24.2	-0.405654	5.85403	0.334199	0.869198
NM_001624	AIM1	CRYBG1	crystallin beta-gamma domain containing 1	6q21	0.633286	5.08239	0.133741	0.589618
NM_001039775	AIM1L	CRYBG2	crystallin beta-gamma domain containing 2	1p36.11	-1.13821	-1.38963	0.138821	0.59563
NM_004833	AIM2	AIM2	absent in melanoma 2	1q23.1-q23.2	-2.69477	-2.92327	0.51014	0.967235
NM_001142415	AIMP1	AIMP1	aminoacyl tRNA synthetase complex interacting multifunctional protein 1	4q24	-0.115025	5.73466	0.784593	1
NM_006303	AIMP2	AIMP2	aminoacyl tRNA synthetase complex interacting multifunctional protein 2	7p22.1	-0.565748	5.78982	0.17862	0.675462
NM_003977	AIP	AIP	aryl hydrocarbon receptor interacting protein	11q13.2	0.397885	5.52674	0.344176	0.878063
NM_014336	AIPL1	AIPL1	aryl hydrocarbon receptor interacting protein like 1	17p13.2	4.62322	-2.34254	0.00737888	0.0789612
NM_000383	AIRE	AIRE	autoimmune regulator	21q22.3	2.6427	-2.92751	0.51014	0.967235
NM_001042478	AJAP1	AJAP1	adherens junctions associated protein 1	1p36.32	-1.08947	2.24354	0.0139307	0.12797
NM_032876	AJUBA	AJUBA	ajuba LIM protein	14q11.2	0.774666	7.65664	0.0653086	0.382328
NM_000476	AK1	AK1	adenylate kinase 1	9q34.11	-0.933904	4.46024	0.0284867	0.218601
NM_001199199	AK2	AK2	adenylate kinase 2	1p35.1	0.516475	7.55295	0.217716	0.742971
NM_001199852	AK3	AK3	adenylate kinase 3	9p24.1	-0.379639	6.38305	0.365248	0.900132
NM_203464	AK4	AK4	adenylate kinase 4	1p31.3	0.824818	7.31242	0.0499618	0.322602
NM_152468	TMC8	TMC8	transmembrane channel like 8	17q25.3	-6.97908	-0.867	2.8397e-09	1.75562e-07
NM_152327	AK7	AK7	adenylate kinase 7	14q32.2	-0.301567	1.68828	0.503617	0.967235
NM_012385	NUPR1	NUPR1	nuclear protein 1, transcriptional regulator	16p11.2	-6.93155	3.08114	2.29711e-28	1.64411e-25
NM_003488	AKAP1	AKAP1	A-kinase anchoring protein 1	17q22	-0.256433	5.80911	0.541409	0.986337
NM_007202	AKAP10	AKAP10	A-kinase anchoring protein 10	17p11.2	-0.087997	4.56808	0.836901	1
NM_016248	AKAP11	AKAP11	A-kinase anchoring protein 11	13q14.11	0.14114	5.64911	0.737321	1
NM_000689	ALDH1A1	ALDH1A1	aldehyde dehydrogenase 1 family member A1	9q21.13	-6.79385	5.75727	1.55859e-34	3.22265e-31
NM_006738	AKAP13	AKAP13	A-kinase anchoring protein 13	15q25.3	0.584032	6.5853	0.164104	0.646447
NR_027383	AKAP17A	AKAP17A	A-kinase anchoring protein 17A	Xp22.33 and Yp11.32	-0.0897247	6.01688	0.830955	1
NM_001198656	AKAP2	AKAP2	A-kinase anchoring protein 2	9q31.3	0.391579	8.32322	0.349251	0.883045
NM_006422	AKAP3	AKAP3	A-kinase anchoring protein 3	12p13.32	-0.812255	-0.572692	0.159826	0.63701
NM_004857	AKAP5	AKAP5	A-kinase anchoring protein 5	14q23.3	0.626823	2.62478	0.149061	0.616416
NM_004274	AKAP6	AKAP6	A-kinase anchoring protein 6	14q12	-0.638488	0.495939	0.207273	0.730137
NM_016377	AKAP7	AKAP7	A-kinase anchoring protein 7	6q23.2	-0.457371	3.00943	0.291554	0.826809
NM_005858	AKAP8	AKAP8	A-kinase anchoring protein 8	19p13.12	-0.0359073	5.75496	0.932637	1
NM_014371	AKAP8L	AKAP8L	A-kinase anchoring protein 8 like	19p13.12	-0.340935	6.01115	0.416637	0.931651
NM_005751	AKAP9	AKAP9	A-kinase anchoring protein 9	7q21.2	-0.106292	5.53207	0.800925	1
NM_001145128	AKD1	AK9	adenylate kinase 9	6q21	-0.0558283	1.90559	0.919092	1
NM_001206646	AKIP1	AKIP1	A-kinase interacting protein 1	11p15.4	-0.708144	4.52706	0.0949002	0.474986
NM_024595	AKIRIN1	AKIRIN1	akirin 1	1p34.3	-0.176462	5.95804	0.674434	1
NM_018064	AKIRIN2	AKIRIN2	akirin 2	6q15	0.0869422	5.34526	0.836715	1
NM_030767	AKNA	AKNA	AT-hook transcription factor	9q32	0.095243	6.68431	0.820202	1
NM_152763	AKNAD1	AKNAD1	AKNA domain containing 1	1p13.3	-1.35644	-2.72707	0.639766	1
NM_001202413	AKR1A1	AKR1A1	aldo-keto reductase family 1 member A1	1p34.1	-0.613357	6.74938	0.144065	0.603993
NM_001628	AKR1B1	AKR1B1	aldo-keto reductase family 1 member B	7q33	-0.584209	9.97333	0.16304	0.643891
NM_020299	AKR1B10	AKR1B10	aldo-keto reductase family 1 member B10	7q33	-0.782107	-1.09226	0.274123	0.805607
NM_001080538	AKR1B15	AKR1B15	aldo-keto reductase family 1 member B15	7q33	1.3336	-2.56616	0.39961	0.91818
NM_001353	AKR1C1	AKR1C1	aldo-keto reductase family 1 member C1	10p15.1	-0.232822	2.70193	0.593594	1
NM_001354	AKR1C2	AKR1C2	aldo-keto reductase family 1 member C2	10p15.1	-0.194945	2.62589	0.654812	1
NM_001253908	AKR1C3	AKR1C3	aldo-keto reductase family 1 member C3	10p15.1	0.241434	5.36388	0.566181	0.999066
NM_001818	AKR1C4	AKR1C4	aldo-keto reductase family 1 member C4	10p15.1	0.297932	0.8707	0.540486	0.986337
NR_027916	AKR1CL1	AKR1C8P	aldo-keto reductase family 1 member C8, pseudogene	10p15.1	-1.89861	-3.03235	1	1
NM_005989	AKR1D1	AKR1D1	aldo-keto reductase family 1 member D1	7q33	-0.879863	-1.62529	0.303001	0.843506
NM_001040177	AKR1E2	AKR1E2	aldo-keto reductase family 1 member E2	10p15.1	1.41784	-0.490799	0.0169257	0.149205
NM_003689	AKR7A2	AKR7A2	aldo-keto reductase family 7 member A2	1p36.13	-0.119948	6.00616	0.775312	1
NR_002796	AKR7A2P1	AKR7A2P1	aldo-keto reductase family 7 member A2 pseudogene 1	1p13.2	-0.00240232	-0.730498	1	1
NM_012067	AKR7A3	AKR7A3	aldo-keto reductase family 7 member A3	1p36.13	0.226577	1.16876	0.636478	1
NR_040288	AKR7L	AKR7L	aldo-keto reductase family 7 like (gene/pseudogene)	1p36.13	0.352052	1.35715	0.460914	0.962487
NM_001014431	AKT1	AKT1	AKT serine/threonine kinase 1	14q32.33	0.276036	7.95649	0.509137	0.967235
NM_032375	AKT1S1	AKT1S1	AKT1 substrate 1	19q13.33	-0.4171	6.13452	0.320359	0.862494
NM_001243027	AKT2	AKT2	AKT serine/threonine kinase 2	19q13.2	0.0320337	7.30915	0.93923	1
NM_181690	AKT3	AKT3	AKT serine/threonine kinase 3	1q43-q44	0.736766	6.23651	0.0801119	0.430619
NM_022476	AKTIP	AKTIP	AKT interacting protein	16q12.2	-0.242213	4.22482	0.56865	1
NM_000031	ALAD	ALAD	aminolevulinate dehydratase	9q32	-0.224316	4.87973	0.595607	1
NM_199166	ALAS1	ALAS1	5'-aminolevulinate synthase 1	3p21.2	-0.77458	5.77051	0.0662677	0.38473
NM_000477	ALB	ALB	albumin	4q13.3	-1.24523	-2.47712	0.484513	0.967235
NM_001243280	ALCAM	ALCAM	activated leukocyte cell adhesion molecule	3q13.11	0.22661	8.53595	0.587637	1
NM_153329	ALDH16A1	ALDH16A1	aldehyde dehydrogenase 16 family member A1	19q13.33	-0.364476	5.66111	0.385915	0.914812
NM_002860	ALDH18A1	ALDH18A1	aldehyde dehydrogenase 18 family member A1	10q24.1	0.194953	7.11789	0.641463	1
NM_000640	IL13RA2	IL13RA2	interleukin 13 receptor subunit alpha 2	Xq23	-6.74933	0.547731	2.73642e-16	4.46685e-14
NM_001712	CEACAM1	CEACAM1	carcinoembryonic antigen related cell adhesion molecule 1	19q13.2	-6.72278	1.2794	6.94772e-20	1.90132e-17
NM_015900	PLA1A	PLA1A	phospholipase A1 member A	3q13.33	-6.71956	4.25384	1.36686e-31	2.11966e-28
NM_000692	ALDH1B1	ALDH1B1	aldehyde dehydrogenase 1 family member B1	9p13.1	0.482985	6.66478	0.249656	0.788552
NM_012190	ALDH1L1	ALDH1L1	aldehyde dehydrogenase 1 family member L1	3q21.3	0.0299013	-0.371483	1	1
NM_001034173	ALDH1L2	ALDH1L2	aldehyde dehydrogenase 1 family member L2	12q23.3	0.476368	0.045394	0.384557	0.913674
NM_001204889	ALDH2	ALDH2	aldehyde dehydrogenase 2 family member	12q24.12	0.284547	4.8845	0.500769	0.967235
NM_001031806	ALDH3A2	ALDH3A2	aldehyde dehydrogenase 3 family member A2	17p11.2	-0.0419072	3.87896	0.926306	1
NM_001161473	ALDH3B1	ALDH3B1	aldehyde dehydrogenase 3 family member B1	11q13.2	-0.92495	5.60194	0.028753	0.219559
NM_000695	ALDH3B2	ALDH3B2	aldehyde dehydrogenase 3 family member B2	11q13.2	-0.807535	0.204662	0.123826	0.563563
NM_170726	ALDH4A1	ALDH4A1	aldehyde dehydrogenase 4 family member A1	1p36.13	-0.445066	4.55085	0.293053	0.82904
NM_001080	ALDH5A1	ALDH5A1	aldehyde dehydrogenase 5 family member A1	6p22.3	-1.0568	3.59105	0.0141374	0.129304
NM_005589	ALDH6A1	ALDH6A1	aldehyde dehydrogenase 6 family member A1	14q24.3	-0.122136	2.61862	0.786102	1
NM_001182	ALDH7A1	ALDH7A1	aldehyde dehydrogenase 7 family member A1	5q23.2	0.059051	6.53852	0.888134	1
NM_001193480	ALDH8A1	ALDH8A1	aldehyde dehydrogenase 8 family member A1	6q23.3	-0.992954	-0.04666	0.0672	0.388482
NM_000696	ALDH9A1	ALDH9A1	aldehyde dehydrogenase 9 family member A1	1q24.1	-0.313895	6.23769	0.454162	0.957351
NM_000034	ALDOA	ALDOA	aldolase, fructose-bisphosphate A	16p11.2	0.522026	10.8384	0.212244	0.737895
NM_005165	ALDOC	ALDOC	aldolase, fructose-bisphosphate C	17q11.2	0.0270476	0.12488	1	1
NM_019109	ALG1	ALG1	ALG1, chitobiosyldiphosphodolichol beta-mannosyltransferase	16p13.3	-0.479063	4.8519	0.256604	0.794151
NM_032834	ALG10	ALG10	ALG10, alpha-1,2-glucosyltransferase	12p11.1	-0.0475045	2.53246	0.920517	1
NM_001013620	ALG10B	ALG10B	ALG10B, alpha-1,2-glucosyltransferase	12q12	0.132756	4.11967	0.756531	1
NR_036571	ALG11	ALG11	ALG11, alpha-1,2-mannosyltransferase	13q14.3	0.500099	3.60028	0.241019	0.780022
NM_024105	ALG12	ALG12	ALG12, alpha-1,6-mannosyltransferase	22q13.33	-0.390833	4.79332	0.354757	0.889207
NM_001099922	ALG13	ALG13	ALG13, UDP-N-acetylglucosaminyltransferase subunit	Xq23	0.0943671	5.38307	0.823685	1
NM_144988	ALG14	ALG14	ALG14, UDP-N-acetylglucosaminyltransferase subunit	1p21.3	0.444284	3.17387	0.300381	0.840192
NM_001015050	ALG1L	ALG1L	ALG1, chitobiosyldiphosphodolichol beta-mannosyltransferase like	3q21.2	-0.970947	-1.4507	0.215824	0.741039
NM_001136152	ALG1L2	ALG1L2	ALG1, chitobiosyldiphosphodolichol beta-mannosyltransferase like 2	3q22.1	1.80302	-2.79231	0.265211	0.794151
NM_033087	ALG2	ALG2	ALG2, alpha-1,3/1,6-mannosyltransferase	9q22.33	-0.275003	5.53272	0.512929	0.967964
NR_024534	ALG3	ALG3	ALG3, alpha-1,3- mannosyltransferase	3q27.1	-0.501407	5.60288	0.23323	0.770354
NM_001142364	ALG5	ALG5	ALG5, dolichyl-phosphate beta-glucosyltransferase	13q13.3	-0.0795091	4.71916	0.85215	1
NM_013339	ALG6	ALG6	ALG6, alpha-1,3-glucosyltransferase	1p31.3	-0.189043	3.92884	0.657773	1
NM_024079	ALG8	ALG8	ALG8, alpha-1,3-glucosyltransferase	11q14.1	-0.222069	5.13543	0.598504	1
NM_024740	ALG9	ALG9	ALG9, alpha-1,2-mannosyltransferase	11q23.1	0.0364306	5.15049	0.932465	1
NM_014441	SIGLEC9	SIGLEC9	sialic acid binding Ig like lectin 9	19q13.3-q13.4	-6.68679	-1.10276	3.48889e-08	1.75473e-06
NM_006020	ALKBH1	ALKBH1	alkB homolog 1, histone H2A dioxygenase	14q24.3	0.246948	3.38864	0.565156	0.998291
NM_001001655	ALKBH2	ALKBH2	alkB homolog 2, alpha-ketoglutarate dependent dioxygenase	12q24.11	0.269947	3.64478	0.530292	0.981394
NM_139178	ALKBH3	ALKBH3	alkB homolog 3, alpha-ketoglutaratedependent dioxygenase	11p11.2	0.209518	4.2096	0.622473	1
NM_017621	ALKBH4	ALKBH4	alkB homolog 4, lysine demethylase	7q22.1	-0.125006	3.46829	0.774647	1
NM_017758	ALKBH5	ALKBH5	alkB homolog 5, RNA demethylase	17p11.2	0.380064	6.71135	0.364425	0.89938
NM_032878	ALKBH6	ALKBH6	alkB homolog 6	19q13.12	-0.769943	4.04722	0.0713824	0.404247
NM_032306	ALKBH7	ALKBH7	alkB homolog 7	19p13.3	-0.573553	4.06779	0.178019	0.674832
NM_138775	ALKBH8	ALKBH8	alkB homolog 8, tRNA methyltransferase	11q22.3	-0.123647	3.97834	0.7733	1
NM_015120	ALMS1	ALMS1	ALMS1, centrosome and basal body associated protein	2p13.1	-0.00816729	4.81877	0.986364	1
NR_003683	ALMS1P	ALMS1P1	ALMS1, centrosome and basal body associated protein pseudogene 1	2p13.1	-0.0550332	-1.73446	1	1
NM_001139	ALOX12B	ALOX12B	arachidonate 12-lipoxygenase, 12R type	17p13.1	1.91868	-2.2081	0.0957438	0.476644
NM_080657	RSAD2	RSAD2	radical S-adenosyl methionine domain containing 2	2p25.2	-6.67422	3.17144	7.51081e-28	5.17662e-25
NM_001140	ALOX15	ALOX15	arachidonate 15-lipoxygenase	17p13.2	-1.89861	-3.03235	1	1
NM_001141	ALOX15B	ALOX15B	arachidonate 15-lipoxygenase, type B	17p13.1	-2.6841	-2.92758	0.51014	0.967235
NR_045985	ALOX15P1	ALOX15P1	arachidonate 15-lipoxygenase pseudogene 1	17p13.1	-3.18234	-2.8321	0.265211	0.794151
NM_001256153	ALOX5	ALOX5	arachidonate 5-lipoxygenase	10q11.21	-0.433151	-2.03885	0.81577	1
NM_001204406	ALOX5AP	ALOX5AP	arachidonate 5-lipoxygenase activating protein	13q12.3	0.532898	0.427132	0.269455	0.800238
NM_007168	ABCA8	ABCA8	ATP binding cassette subfamily A member 8	17q24.2	-6.65501	-1.12939	4.8669e-08	2.37089e-06
NM_001102406	ALPK1	ALPK1	alpha kinase 1	4q25	-0.204676	3.9836	0.634061	1
NM_153612	HS3ST5	HS3ST5	heparan sulfate-glucosamine 3-sulfotransferase 5	6q21-q22.1	-6.61066	-1.16272	6.82113e-08	3.2631e-06
NM_020778	ALPK3	ALPK3	alpha kinase 3	15q25.3	0.923907	-0.870729	0.130096	0.579731
NM_001177520	ALPL	ALPL	alkaline phosphatase, liver/bone/kidney	1p36.12	-0.270364	0.586604	0.623956	1
NM_020919	ALS2	ALS2	ALS2, alsin Rho guanine nucleotide exchange factor	2q33.1	-0.129984	5.95139	0.757217	1
NM_001190707	ALS2CL	ALS2CL	ALS2 C-terminal like	3p21.31	-1.06808	6.32918	0.0116143	0.112393
NM_139163	ALS2CR12	ALS2CR12	amyotrophic lateral sclerosis 2 chromosome region 12	2q33.1	0.0444443	-1.01713	1	1
NM_001104586	ALS2CR8	CARF	calcium responsive transcription factor	2q33.2	-0.6494	3.14056	0.133206	0.588236
NM_006982	ALX1	ALX1	ALX homeobox 1	12q21.31	-0.828311	-2.82827	1	1
NM_021926	ALX4	ALX4	ALX homeobox 4	11p11.2	-0.0432659	-2.92589	1	1
NM_005782	ALYREF	ALYREF	Aly/REF export factor	17q25.3	0.170342	6.28757	0.684542	1
NM_001167595	AMACR	AMACR	alpha-methylacyl-CoA racemase	5p13.2	-0.802792	4.37195	0.058911	0.359081
NM_001633	AMBP	AMBP	alpha-1-microglobulin/bikunin precursor	9q32	0.286637	0.506467	0.574488	1
NM_017749	AMBRA1	AMBRA1	autophagy and beclin 1 regulator 1	11p11.2	-0.0245653	5.17027	0.954743	1
NM_001634	AMD1	AMD1	adenosylmethionine decarboxylase 1	6q21	0.430258	7.02153	0.304313	0.845471
NM_152435	AMDHD1	AMDHD1	amidohydrolase domain containing 1	12q23.1	-0.900586	-1.86889	0.405553	0.921032
NM_003806	HRK	HRK	harakiri, BCL2 interacting protein	12q24.22	-6.59566	0.418226	1.89793e-15	2.84827e-13
NM_001144	AMFR	AMFR	autocrine motility factor receptor	16q13	0.260469	6.60602	0.534193	0.983369
NM_000479	AMH	AMH	anti-Mullerian hormone	19p13.3	-0.429757	5.50728	0.306857	0.848786
NM_001098526	AMICA1	JAML	junction adhesion molecule like	11q23.3	-0.0432659	-2.92589	1	1
NM_020703	AMIGO1	AMIGO1	adhesion molecule with Ig like domain 1	1p13.3	-0.0992775	1.08545	0.860399	1
NM_181847	AMIGO2	AMIGO2	adhesion molecule with Ig like domain 2	12q13.11	0.971174	8.8269	0.0211693	0.176497
NM_198722	AMIGO3	AMIGO3	adhesion molecule with Ig like domain 3	3p21.31	-0.426141	3.47101	0.321963	0.862969
NM_015365	AMMECR1	AMMECR1	Alport syndrome, mental retardation, midface hypoplasia and elliptocytosis chromosomal region gene 1	Xq23	-0.0645434	5.52415	0.878466	1
NM_031445	AMMECR1L	AMMECR1L	AMMECR1 like	2q14.3	0.511539	5.52517	0.224159	0.754231
NM_030943	AMN	AMN	amnion associated transmembrane protein	14q32.32	-1.35982	-2.7246	0.639766	1
NR_004854	AMN1	AMN1	antagonist of mitotic exit network 1 homolog	12p11.21	0.116168	2.79499	0.795365	1
NM_133265	AMOT	AMOT	angiomotin	Xq23	0.607095	4.68479	0.152023	0.619422
NM_130847	AMOTL1	AMOTL1	angiomotin like 1	11q21	0.324228	6.17271	0.43949	0.948426
NM_016201	AMOTL2	AMOTL2	angiomotin like 2	3q22.2	-0.0698132	7.57753	0.867515	1
NM_139156	AMPD2	AMPD2	adenosine monophosphate deaminase 2	1p13.3	0.689552	7.21666	0.100667	0.493758
NM_001172431	AMPD3	AMPD3	adenosine monophosphate deaminase 3	11p15.4	-0.12622	1.89628	0.798029	1
NM_001635	AMPH	AMPH	amphiphysin	7p14.1	-3.17784	-2.83409	0.265211	0.794151
NM_001164712	AMT	AMT	aminomethyltransferase	3p21.31	-0.0313333	3.39315	0.946043	1
NM_000804	FOLR3	FOLR3	folate receptor 3	11q13.4	-6.50374	1.06976	1.64952e-18	3.48817e-16
NM_001035003	KCNIP4	KCNIP4	potassium voltage-gated channel interacting protein 4	4p15.31-p15.2	-6.47202	0.304249	9.77047e-15	1.32714e-12
NM_138737	HEPH	HEPH	hephaestin	Xq12	-6.45883	0.291927	1.14042e-14	1.52677e-12
NM_002122	HLA-DQA1	HLA-DQA1	major histocompatibility complex, class II, DQ alpha 1	6p21.32	-6.41622	-1.31574	2.76621e-07	1.17526e-05
NM_021804	ACE2	ACE2	angiotensin I converting enzyme 2	Xp22.2	-6.39546	-1.32441	3.97763e-07	1.61615e-05
NM_000567	CRP	CRP	C-reactive protein	1q23.2	-6.38008	-1.33347	3.97763e-07	1.61615e-05
NM_005559	LAMA1	LAMA1	laminin subunit alpha 1	18p11.31	-6.37817	5.38077	1.13073e-31	1.91288e-28
NM_001033572	AMZ2	AMZ2	archaelysin family metallopeptidase 2	17q24.2	-0.168604	5.52401	0.68859	1
NR_026903	AMZ2P1	AMZ2P1	archaelysin family metallopeptidase 2 pseudogene 1	17q24.1	-0.0136034	2.06944	0.987889	1
NM_022662	ANAPC1	ANAPC1	anaphase promoting complex subunit 1	2q13	0.408637	5.52749	0.331173	0.866504
NM_001256711	ANAPC10	ANAPC10	anaphase promoting complex subunit 10	4q31.21	-0.0700779	3.36146	0.8751	1
NM_001002246	ANAPC11	ANAPC11	anaphase promoting complex subunit 11	17q25.3	0.254661	5.70429	0.544502	0.986337
NM_001242374	ANAPC13	ANAPC13	anaphase promoting complex subunit 13	3q22.2	-0.443683	5.73377	0.291176	0.826586
NR_038391	ANAPC16	ANAPC16	anaphase promoting complex subunit 16	10q22.1	0.118679	6.39973	0.777331	1
NM_013366	ANAPC2	ANAPC2	anaphase promoting complex subunit 2	9q34.3	-0.256012	5.68862	0.542237	0.986337
NM_013367	ANAPC4	ANAPC4	anaphase promoting complex subunit 4	4p15.2	0.0678616	4.76069	0.8737	1
NM_001137559	ANAPC5	ANAPC5	anaphase promoting complex subunit 5	12q24.31	0.361936	6.58194	0.387754	0.916398
NM_016238	ANAPC7	ANAPC7	anaphase promoting complex subunit 7	12q24.11	0.12974	5.99107	0.75735	1
NM_001145	ANG	ANG	angiogenin	14q11.2	0.440429	2.19996	0.329237	0.865065
NM_015305	ANGEL1	ANGEL1	angel homolog 1	14q24.3	-0.0910832	4.18644	0.831294	1
NM_144567	ANGEL2	ANGEL2	angel homolog 2	1q32.3	-0.136689	4.94714	0.746508	1
NM_001199859	ANGPT1	ANGPT1	angiopoietin 1	8q23.1	-4.33771	-2.47871	0.0229403	0.185403
NM_001118888	ANGPT2	ANGPT2	angiopoietin 2	8p23.1	-3.54825	-2.7429	0.140359	0.59563
NM_015985	ANGPT4	ANGPT4	angiopoietin 4	20p13	-2.69477	-2.92327	0.51014	0.967235
NM_004673	ANGPTL1	ANGPTL1	angiopoietin like 1	1q25.2	-1.88266	-3.03879	1	1
NM_012098	ANGPTL2	ANGPTL2	angiopoietin like 2	9q33.3	0.0811435	4.51827	0.84679	1
NM_001039667	ANGPTL4	ANGPTL4	angiopoietin like 4	19p13.2	0.801112	0.53504	0.0917739	0.470215
NM_031917	ANGPTL6	ANGPTL6	angiopoietin like 6	19p13.2	2.3973	-1.40694	0.0075161	0.0800155
NM_021146	ANGPTL7	ANGPTL7	angiopoietin like 7	1p36.22	-0.822892	-2.82996	1	1
NM_000037	ANK1	ANK1	ankyrin 1	8p11.21	-1.73873	-0.649227	0.00612316	0.0683539
NM_024560	ACSS3	ACSS3	acyl-CoA synthetase short chain family member 3	12q21.31	-6.37811	-1.33478	3.97763e-07	1.61615e-05
NM_207311	CCDC64	BICDL1	BICD family like cargo adaptor 1	12q24.23	-6.35928	2.51844	1.80104e-24	9.30985e-22
NM_144708	ANKAR	ANKAR	ankyrin and armadillo repeat containing	2q32.2	-0.553372	1.18636	0.236476	0.775678
NM_182703	ANKDD1A	ANKDD1A	ankyrin repeat and death domain containing 1A	15q22.31	0.873507	-0.256493	0.096683	0.479907
NM_153228	ANKFN1	ANKFN1	ankyrin repeat and fibronectin type III domain containing 1	17q22	-2.88194	-2.24167	0.0219525	0.180678
NM_016376	ANKFY1	ANKFY1	ankyrin repeat and FYVE domain containing 1	17p13.2	-0.231645	6.52886	0.580472	1
NM_054027	ANKH	ANKH	ANKH inorganic pyrophosphate transport regulator	5p15.2	0.721251	4.2051	0.0895831	0.462688
NM_017747	ANKHD1	ANKHD1	ankyrin repeat and KH domain containing 1	5q31.3	-0.0286787	6.70454	0.945968	1
NM_020690	ANKHD1-EIF4EBP3	ANKHD1-EIF4EBP3	ANKHD1-EIF4EBP3 readthrough	5q31.3	-0.0199323	6.75817	0.962599	1
NM_019004	ANKIB1	ANKIB1	ankyrin repeat and IBR domain containing 1	7q21.2	-0.176765	6.42258	0.67319	1
NM_178510	ANKK1	ANKK1	ankyrin repeat and kinase domain containing 1	11q23.2	-1.6969	-2.3352	0.218382	0.742971
NM_152363	ANKLE1	ANKLE1	ankyrin repeat and LEM domain containing 1	19p13.11	0.823308	0.291098	0.106683	0.514582
NM_015114	ANKLE2	ANKLE2	ankyrin repeat and LEM domain containing 2	12q24.33	0.959349	7.58113	0.0228594	0.185403
NM_016552	ANKMY1	ANKMY1	ankyrin repeat and MYND domain containing 1	2q37.3	-0.257461	3.44272	0.551379	0.989204
NM_020319	ANKMY2	ANKMY2	ankyrin repeat and MYND domain containing 2	7p21.1	-0.108284	4.82201	0.798305	1
NM_023039	ANKRA2	ANKRA2	ankyrin repeat family A member 2	5q13.2	0.349035	3.42756	0.419199	0.934348
NM_001465	FYB	FYB1	FYN binding protein 1	5p13.1	-6.32201	-1.37449	8.36542e-07	3.14489e-05
NM_017664	ANKRD10	ANKRD10	ankyrin repeat domain 10	13q34	-0.322166	5.9863	0.442721	0.950009
NM_013275	ANKRD11	ANKRD11	ankyrin repeat domain 11	16q24.3	0.159906	7.5338	0.702141	1
NM_015208	ANKRD12	ANKRD12	ankyrin repeat domain 12	18p11.22	0.113319	5.66352	0.787755	1
NM_033121	ANKRD13A	ANKRD13A	ankyrin repeat domain 13A	12q24.11	0.76112	6.73096	0.0704448	0.401049
NM_152345	ANKRD13B	ANKRD13B	ankyrin repeat domain 13B	17q11.2	-0.763057	4.30485	0.0723048	0.406993
NM_030816	ANKRD13C	ANKRD13C	ankyrin repeat domain 13C	1p31.1	-0.0892249	5.26333	0.833104	1
NM_207354	ANKRD13D	ANKRD13D	ankyrin repeat domain 13D	11q13.2	-0.19969	5.34503	0.635405	1
NM_019046	ANKRD16	ANKRD16	ankyrin repeat domain 16	10p15.1	-0.286784	3.00908	0.511117	0.967607
NM_032217	ANKRD17	ANKRD17	ankyrin repeat domain 17	4q13.3	0.479106	6.92128	0.253053	0.793314
NM_002575	SERPINB2	SERPINB2	serpin family B member 2	18q21.33-q22.1	-6.30455	3.31726	5.9181e-27	3.79758e-24
NM_001244752	ANKRD18B	ANKRD18B	ankyrin repeat domain 18B	9p13.3	-0.693626	2.78262	0.112067	0.528633
NM_001144896	CD209	CD209	CD209 molecule	19p13.2	-6.2843	1.70967	5.45936e-21	1.75161e-18
NR_026868	ANKRD19P	ANKRD19P	ankyrin repeat domain 19, pseudogene	9q22.31	-1.54137	-1.57942	0.0614074	0.369584
NM_003064	SLPI	SLPI	secretory leukocyte peptidase inhibitor	20q13.12	-6.26701	5.27286	6.63852e-31	8.50071e-28
NM_032250	ANKRD20A1	ANKRD20A1	ankyrin repeat domain 20 family member A1	9q21.11	-1.01611	-0.619224	0.102954	0.50259
NR_027270	ANKRD20A11P	ANKRD20A11P	ankyrin repeat domain 20 family member A11, pseudogene	21q11.2	0.904743	-2.08033	0.482676	0.967235
NM_001012421_1	ANKRD20A2	ANKRD20A2	ankyrin repeat domain 20 family member A2	9p11.2	-1.21673	0.338803	0.0203117	0.170415
NM_001012419_1	ANKRD20A3	ANKRD20A3	ankyrin repeat domain 20 family member A3	9q21.11	-1.12554	0.867273	0.0212446	0.177045
NM_001098805	ANKRD20A4	ANKRD20A4	ankyrin repeat domain 20 family member A4	9q13	-1.3518	-0.685235	0.0277608	0.214514
NM_207322	C2CD4A	C2CD4A	C2 calcium dependent domain containing 4A	15q22.2	-6.25662	4.78201	3.56991e-30	3.16345e-27
NR_003366	ANKRD20A8P	ANKRD20A8P	ankyrin repeat domain 20 family member A8, pseudogene	2q11.1	-0.744552	-1.51935	0.330263	0.865787
NR_027995	ANKRD20A9P	ANKRD20A9P	ankyrin repeat domain 20 family member A9, pseudogene	13q11	-0.209956	-0.105903	0.747642	1
NM_144590	ANKRD22	ANKRD22	ankyrin repeat domain 22	10q23.31	-0.428516	-2.48319	1	1
NM_144994	ANKRD23	ANKRD23	ankyrin repeat domain 23	2q11.2	-1.02454	1.6346	0.0242336	0.193132
NM_000906	NPR1	NPR1	natriuretic peptide receptor 1	1q21.3	-6.25458	1.32224	3.21552e-19	7.77113e-17
NM_001256053	ANKRD26	ANKRD26	ankyrin repeat domain 26	10p12.1	-0.446886	4.1251	0.293415	0.829561
NR_026556	ANKRD26P1	ANKRD26P1	ankyrin repeat domain 26 pseudogene 1	16q11.2	-0.0575025	-2.72896	1	1
NM_032139	ANKRD27	ANKRD27	ankyrin repeat domain 27	19q13.11	-0.162501	5.95992	0.698734	1
NM_001195099	ANKRD28	ANKRD28	ankyrin repeat domain 28	3p25.1	-0.0933039	6.3669	0.8242	1
NM_006919	SERPINB3	SERPINB3	serpin family B member 3	18q21.33	-6.24309	-1.43427	1.22397e-06	4.41411e-05
NM_001145029	ANKRD30B	ANKRD30B	ankyrin repeat domain 30B	18p11.21	-0.613092	-1.81333	0.548512	0.987448
NR_026916	ANKRD30BP2	ANKRD30BP2	ankyrin repeat domain 30B pseudogene 2	21q11.2	-0.708344	0.263796	0.172016	0.663802
NM_001164443	ANKRD31	ANKRD31	ankyrin repeat domain 31	5q13.3	-2.99513	-2.19259	0.0137024	0.126797
NM_032290	ANKRD32	SLF1	SMC5-SMC6 complex localization factor 1	5q15	-0.0748774	3.80631	0.867563	1
NM_182608	ANKRD33	ANKRD33	ankyrin repeat domain 33	12q13.13	-0.842919	-2.82173	1	1
NM_001164440	ANKRD33B	ANKRD33B	ankyrin repeat domain 33B	5p15.2	0.290966	5.44392	0.489634	0.967235
NM_001039888	ANKRD34A	ANKRD34A	ankyrin repeat domain 34A	1q21.1	-0.304078	0.476965	0.569593	1
NM_001004441	ANKRD34B	ANKRD34B	ankyrin repeat domain 34B	5q14.1	0.944623	3.31887	0.0289826	0.220949
NM_144698	ANKRD35	ANKRD35	ankyrin repeat domain 35	1q21.1	0.605439	-2.4063	0.746917	1
NM_001164315	ANKRD36	ANKRD36	ankyrin repeat domain 36	2q11.2	-0.0476189	4.09215	0.912168	1
NM_025190	ANKRD36B	ANKRD36B	ankyrin repeat domain 36B	2q11.2	0.0994733	3.71273	0.81638	1
NR_026844	ANKRD36BP1	ANKRD36BP1	ankyrin repeat domain 36B pseudogene 1	1q24.2	0.726945	-3.12029	1	1
NR_015424	ANKRD36BP2	ANKRD36BP2	ankyrin repeat domain 36B pseudogene 2	2p11.2	0.412344	2.05098	0.354954	0.889207
NM_181726	ANKRD37	ANKRD37	ankyrin repeat domain 37	4q35.1	1.1633	2.45177	0.00878711	0.0897965
NM_016466	ANKRD39	ANKRD39	ankyrin repeat domain 39	2q11.2	-0.611501	2.93956	0.159705	0.63701
NM_052855	ANKRD40	ANKRD40	ankyrin repeat domain 40	17q21.33	0.389413	6.19907	0.353284	0.887838
NR_037194	LOC400680	LOC400680			-6.24145	-1.43514	1.22397e-06	4.41411e-05
NM_001195144	ANKRD44	ANKRD44	ankyrin repeat domain 44	2q33.1	0.449278	3.48655	0.296462	0.833515
NM_198493	ANKRD45	ANKRD45	ankyrin repeat domain 45	1q25.1	-0.0420656	-2.92539	1	1
NM_198401	ANKRD46	ANKRD46	ankyrin repeat domain 46	8q22.3	-0.139689	2.93422	0.748751	1
NM_017704	ANKRD49	ANKRD49	ankyrin repeat domain 49	11q21	0.0508442	3.65309	0.905796	1
NM_198285	WDR86	WDR86	WD repeat domain 86	7q36.1	-6.22466	-1.44466	1.22397e-06	4.41411e-05
NM_020337	ANKRD50	ANKRD50	ankyrin repeat domain 50	4q28.1	0.557477	5.33925	0.185572	0.690597
NM_173595	ANKRD52	ANKRD52	ankyrin repeat domain 52	12q13.3	0.1522	7.54511	0.715859	1
NM_024933	ANKRD53	ANKRD53	ankyrin repeat domain 53	2p13.3	-1.30753	-2.74722	0.639766	1
NM_138797	ANKRD54	ANKRD54	ankyrin repeat domain 54	22q13.1	-0.403377	4.77989	0.339621	0.875524
NM_004753	DHRS3	DHRS3	dehydrogenase/reductase 3	1p36.21	-6.18529	5.46387	1.26399e-30	1.38362e-27
NR_040115	ANKRD62P1-PARP4P3	ANKRD62P1-PARP4P3	ANKRD62P1-PARP4P3 readthrough, transcribed pseudogene	22q11.1	-0.221955	-1.7144	0.85205	1
NM_001145210	ANKRD65	ANKRD65	ankyrin repeat domain 65	1p36.33	-0.151644	-2.25223	1	1
NM_019644	ANKRD7	ANKRD7	ankyrin repeat domain 7	7q31.31	-1.55552	-1.16792	0.0278169	0.214701
NM_152326	ANKRD9	ANKRD9	ankyrin repeat domain 9	14q32.31	-0.444951	3.79272	0.296561	0.833515
NM_015245	ANKS1A	ANKS1A	ankyrin repeat and sterile alpha motif domain containing 1A	6p21.31	0.413906	4.88696	0.326216	0.862969
NM_152788	ANKS1B	ANKS1B	ankyrin repeat and sterile alpha motif domain containing 1B	12q23.1	-0.338392	-2.34469	1	1
NR_040252	ANKS3	ANKS3	ankyrin repeat and sterile alpha motif domain containing 3	16p13.3	-0.334219	4.51054	0.430016	0.94305
NM_145865	ANKS4B	ANKS4B	ankyrin repeat and sterile alpha motif domain containing 4B	16p12.2	-3.21637	-2.81763	0.265211	0.794151
NM_173551	ANKS6	ANKS6	ankyrin repeat and sterile alpha motif domain containing 6	9q22.33	-1.16104	6.4903	0.00616744	0.0688069
NM_018089	ANKZF1	ANKZF1	ankyrin repeat and zinc finger domain containing 1	2q35	0.926171	5.92386	0.0283874	0.21793
NM_018685	ANLN	ANLN	anillin actin binding protein	7p14.2	0.0355413	8.72443	0.93226	1
NM_001204833	ANO10	ANO10	anoctamin 10	3p22.1-p21.33	-0.227809	6.08166	0.587159	1
NM_145026	SPATS1	SPATS1	spermatogenesis associated serine rich 1	6p21.1	-6.18283	-1.47601	1.8019e-06	6.23264e-05
NM_178826	ANO4	ANO4	anoctamin 4	12q23.1	-0.0508675	-2.41153	1	1
NM_145001	STK32A	STK32A	serine/threonine kinase 32A	5q32	-6.16795	-1.48421	1.8019e-06	6.23264e-05
NM_001204803	ANO6	ANO6	anoctamin 6	12q12	0.653945	6.85454	0.119402	0.550556
NM_001001891	ANO7	ANO7	anoctamin 7	2q37.3	0.707396	2.30707	0.10979	0.522527
NM_020959	ANO8	ANO8	anoctamin 8	19p13.11	-0.57871	5.06246	0.170239	0.659555
NM_001012302	ANO9	ANO9	anoctamin 9	11p15.5	0.51317	4.62651	0.226354	0.757592
NM_006305	ANP32A	ANP32A	acidic nuclear phosphoprotein 32 family member A	15q23	0.494836	6.72997	0.237933	0.775701
NR_026808	ANP32A-IT1	ANP32A-IT1	ANP32A intronic transcript 1	15q23	-0.839495	-1.76195	0.347711	0.881547
NR_003144	ANP32AP1	ANP32AP1	acidic nuclear phosphoprotein 32 family member A pseudogene 1	15q14	0.273982	1.89332	0.537433	0.984956
NM_006401	ANP32B	ANP32B	acidic nuclear phosphoprotein 32 family member B	9q22.33	0.288928	7.97234	0.489585	0.967235
NM_012403	ANP32C	ANP32C	acidic nuclear phosphoprotein 32 family member C	4q32.3	0.52363	1.0645	0.268937	0.79959
NM_012404	ANP32D	ANP32D	acidic nuclear phosphoprotein 32 family member D	12q13.11	0.375081	-2.10827	1	1
NM_001136479	ANP32E	ANP32E	acidic nuclear phosphoprotein 32 family member E	1q21.2	0.499841	6.92317	0.233078	0.769989
NM_001150	ANPEP	ANPEP	alanyl aminopeptidase, membrane	15q26.1	0.608786	8.44499	0.146272	0.6084
NM_053034	ANTXR1	ANTXR1	anthrax toxin receptor 1	2p13.3	0.897165	5.82638	0.033696	0.247944
NM_058172	ANTXR2	ANTXR2	anthrax toxin receptor 2	4q21.21	0.864004	5.3658	0.0409714	0.282353
NM_000700	ANXA1	ANXA1	annexin A1	9q21.13	-0.790039	9.26474	0.0599869	0.36397
NM_001157	ANXA11	ANXA11	annexin A11	10q22.3	-0.177356	7.2826	0.671638	1
NM_001136015	ANXA2	ANXA2	annexin A2	15q22.2	0.553029	10.8102	0.186474	0.692632
NR_001562	ANXA2P1	ANXA2P1	annexin A2 pseudogene 1	4q31.3	0.540605	5.57307	0.198746	0.712776
NR_003573	ANXA2P2	ANXA2P2	annexin A2 pseudogene 2	9p13.3	0.570517	8.83949	0.17318	0.664494
NR_001446	ANXA2P3	ANXA2P3	annexin A2 pseudogene 3	10q21.3	0.61627	1.29338	0.178955	0.676313
NM_005139	ANXA3	ANXA3	annexin A3	4q21.21	0.583132	7.7582	0.164254	0.646624
NM_001153	ANXA4	ANXA4	annexin A4	2p13.3	-1.19722	8.00322	0.00470085	0.0554713
NM_001154	ANXA5	ANXA5	annexin A5	4q27	0.0764355	9.52618	0.854777	1
NM_001193544	ANXA6	ANXA6	annexin A6	5q33.1	0.428365	8.01919	0.305966	0.847407
NM_004034	ANXA7	ANXA7	annexin A7	10q22.2	-0.0716169	7.374	0.864211	1
NM_001040084_1	ANXA8	ANXA8	annexin A8	10q11.22	0.270086	0.404928	0.612216	1
NM_001098845_1	ANXA8L1	ANXA8L1	annexin A8 like 1	10q11.22	0.270086	0.404928	0.612216	1
NM_001630	ANXA8L2	ANXA8L1	annexin A8 like 1	10q11.22	0.351153	-0.387483	0.537996	0.984956
NM_003568	ANXA9	ANXA9	annexin A9	1q21.3	-1.6846	-2.08202	0.13476	0.59117
NM_001637	AOAH	AOAH	acyloxyacyl hydrolase	7p14.2	0.73852	-2.82413	1	1
NM_009590	AOC2	AOC2	amine oxidase, copper containing 2	17q21.31	-0.224204	0.577906	0.651266	1
NM_003734	AOC3	AOC3	amine oxidase, copper containing 3	17q21.31	0.130434	-0.85289	0.916471	1
NR_002773	AOC4	AOC4P	amine oxidase, copper containing 4, pseudogene	17q21.31	1.25699	-2.73636	0.639766	1
NM_001159	AOX1	AOX1	aldehyde oxidase 1	2q33.1	1.15825	3.30926	0.00772011	0.0816734
NR_001557	AOX2P	AOX2P	aldehyde oxidase 2 pseudogene	2q33.1	-0.0480961	-2.92386	1	1
NM_018569	AP1AR	AP1AR	adaptor related protein complex 1 associated regulatory protein	4q25	-0.515012	4.57322	0.223623	0.75306
NM_145730	AP1B1	AP1B1	adaptor related protein complex 1 beta 1 subunit	22q12.2	-0.0166954	7.27836	0.968497	1
NR_040114	AP1B1P1	AP1B1P1	adaptor related protein complex 1 beta 1 subunit pseudogene 1	22q12.3	-1.23181	-3.09329	1	1
NM_001128	AP1G1	AP1G1	adaptor related protein complex 1 gamma 1 subunit	16q22.2	0.283433	6.80787	0.498548	0.967235
NM_003917	AP1G2	AP1G2	adaptor related protein complex 1 gamma 2 subunit	14q11.2	-0.0940775	6.22497	0.822753	1
NM_032493	AP1M1	AP1M1	adaptor related protein complex 1 mu 1 subunit	19p13.11	-0.369147	7.1575	0.378004	0.906715
NM_003085	SNCB	SNCB	synuclein beta	5q35.2	-6.16293	-1.49443	2.66969e-06	8.91926e-05
NM_001283	AP1S1	AP1S1	adaptor related protein complex 1 sigma 1 subunit	7q22.1	-0.521031	6.3845	0.214514	0.740884
NM_003916	AP1S2	AP1S2	adaptor related protein complex 1 sigma 2 subunit	Xp22.2	0.0504888	5.59856	0.905072	1
NM_001039569	AP1S3	AP1S3	adaptor related protein complex 1 sigma 3 subunit	2q36.1	-0.710492	4.37538	0.0943149	0.472947
NM_014203	AP2A1	AP2A1	adaptor related protein complex 2 alpha 1 subunit	19q13.33	-0.316798	7.16847	0.449162	0.955044
NM_012305	AP2A2	AP2A2	adaptor related protein complex 2 alpha 2 subunit	11p15.5	0.127436	6.60496	0.761099	1
NM_001282	AP2B1	AP2B1	adaptor related protein complex 2 beta 1 subunit	17q12	0.344998	8.74398	0.409254	0.92481
NM_001025205	AP2M1	AP2M1	adaptor related protein complex 2 mu 1 subunit	3q27.1	-0.0539086	8.92347	0.897363	1
NM_004069	AP2S1	AP2S1	adaptor related protein complex 2 sigma 1 subunit	19q13.32	-0.226463	7.14263	0.58842	1
NM_003664	AP3B1	AP3B1	adaptor related protein complex 3 beta 1 subunit	5q14.1	-0.00510884	6.17013	0.991112	1
NM_178452	DNAAF1	DNAAF1	dynein axonemal assembly factor 1	16q24.1	-6.14973	-1.49487	2.66969e-06	8.91926e-05
NM_001077523	AP3D1	AP3D1	adaptor related protein complex 3 delta 1 subunit	19p13.3	-0.362657	8.08684	0.385953	0.914812
NM_012095	AP3M1	AP3M1	adaptor related protein complex 3 mu 1 subunit	10q22.2	0.211998	6.16997	0.613336	1
NM_006803	AP3M2	AP3M2	adaptor related protein complex 3 mu 2 subunit	8p11.21	0.0385246	5.11012	0.928195	1
NM_001284	AP3S1	AP3S1	adaptor related protein complex 3 sigma 1 subunit	5q22.3-q23.1	0.379649	5.92483	0.365822	0.900474
NR_037582	AP3S2	AP3S2	adaptor related protein complex 3 sigma 2 subunit	15q26.1	-0.00986791	5.80333	0.982315	1
NM_006594	AP4B1	AP4B1	adaptor related protein complex 4 beta 1 subunit	1p13.2	0.279735	4.6722	0.508254	0.967235
NM_007347	AP4E1	AP4E1	adaptor related protein complex 4 epsilon 1 subunit	15q21.2	0.247094	4.51052	0.559595	0.994224
NM_004722	AP4M1	AP4M1	adaptor related protein complex 4 mu 1 subunit	7q22.1	-0.20461	4.65551	0.62892	1
NM_001254729	AP4S1	AP4S1	adaptor related protein complex 4 sigma 1 subunit	14q12	0.991048	2.45202	0.0254374	0.20126
NM_138368	AP5B1	AP5B1	adaptor related protein complex 5 beta 1 subunit	11q13.1	0.0558903	5.13831	0.895535	1
NM_001160	APAF1	APAF1	apoptotic peptidase activating factor 1	12q23.1	0.303483	5.15728	0.470748	0.967235
NM_001163	APBA1	APBA1	amyloid beta precursor protein binding family A member 1	9q21.12	0.377549	1.02771	0.424535	0.938039
NM_001130414	APBA2	APBA2	amyloid beta precursor protein binding family A member 2	15q13.1	0.882458	3.98151	0.0392933	0.276136
NM_004886	APBA3	APBA3	amyloid beta precursor protein binding family A member 3	19p13.3	0.226729	4.19902	0.595583	1
NM_145689	APBB1	APBB1	amyloid beta precursor protein binding family B member 1	11p15.4	1.03755	4.56135	0.0148316	0.134635
NM_019043	APBB1IP	APBB1IP	amyloid beta precursor protein binding family B member 1 interacting protein	10p12.1	-0.0753302	-2.40259	1	1
NM_001608	ACADL	ACADL	acyl-CoA dehydrogenase long chain	2q34	-6.10812	0.70404	3.62715e-16	5.86935e-14
NM_133174	APBB3	APBB3	amyloid beta precursor protein binding family B member 3	5q31.3	0.122471	4.51536	0.773241	1
NM_001127511	APC	APC	APC, WNT signaling pathway regulator	5q22.2	0.170831	5.12152	0.684988	1
NM_005883	APC2	APC2	APC2, WNT signaling pathway regulator	19p13.3	-0.788843	-0.640206	0.170298	0.659555
NM_001136503	C19orf77	SMIM24	small integral membrane protein 24	19p13.3	-6.08579	-1.54541	3.98156e-06	0.000126654
NM_001640	APEH	APEH	acylaminoacyl-peptide hydrolase	3p21.31	-0.233505	7.5071	0.576673	1
NM_080648	APEX1	APEX1	apurinic/apyrimidinic endodeoxyribonuclease 1	14q11.2	0.369379	7.32283	0.377562	0.906715
NM_014481	APEX2	APEX2	apurinic/apyrimidinic endodeoxyribonuclease 2	Xp11.21	-0.420118	5.21347	0.318318	0.859862
NM_001077628	APH1A	APH1A	aph-1 homolog A, gamma-secretase subunit	1q21.2	0.093227	7.51701	0.823665	1
NM_031301	APH1B	APH1B	aph-1 homolog B, gamma-secretase subunit	15q22.2	-0.729548	0.0970517	0.172295	0.663802
NR_024625	API5	API5	apoptosis inhibitor 5	11p12	0.280529	7.06728	0.502798	0.967235
NM_015957	APIP	APIP	APAF1 interacting protein	11p13	-0.52555	4.40915	0.214878	0.741039
NM_199294	APITD1	CENPS	centromere protein S	1p36.22	-0.547194	4.04891	0.198801	0.712776
NM_199006	APITD1-CORT	CENPS-CORT	CENPS-CORT readthrough	1p36.22	-0.432905	3.31388	0.314774	0.85663
NM_173545	APLF	APLF	aprataxin and PNKP like factor	2p13.3	0.517644	2.70877	0.238905	0.777243
NM_001003665	C1orf95	STUM	stum, mechanosensory transduction mediator homolog	1q42.12	-6.07327	0.669671	6.68748e-16	1.04578e-13
NM_005166	APLP1	APLP1	amyloid beta precursor like protein 1	19q13.12	0.306617	2.00351	0.504851	0.967235
NR_024515	APLP2	APLP2	amyloid beta precursor like protein 2	11q24.3	0.159672	10.0412	0.702152	1
NM_000039	APOA1	APOA1	apolipoprotein A1	11q23.3	-0.808894	-2.83666	1	1
NM_144772	APOA1BP	NAXE	NAD(P)HX epimerase	1q22	-0.457193	5.88407	0.276453	0.806225
NM_001643	APOA2	APOA2	apolipoprotein A2	1q23.3	-1.89861	-3.03235	1	1
NM_000384	APOB	APOB	apolipoprotein B	2p24.1	-3.20722	-2.82164	0.265211	0.794151
NM_001193289	APOBEC3A	APOBEC3A	apolipoprotein B mRNA editing enzyme catalytic subunit 3A	22q13.1	0.184208	3.74731	0.667507	1
NM_004900	APOBEC3B	APOBEC3B	apolipoprotein B mRNA editing enzyme catalytic subunit 3B	22q13.1	0.276439	5.23502	0.511368	0.967607
NM_014508	APOBEC3C	APOBEC3C	apolipoprotein B mRNA editing enzyme catalytic subunit 3C	22q13.1	0.163839	4.19384	0.700464	1
NM_152426	APOBEC3D	APOBEC3D	apolipoprotein B mRNA editing enzyme catalytic subunit 3D	22q13.1	0.472793	1.52887	0.302955	0.843506
NM_001006666	APOBEC3F	APOBEC3F	apolipoprotein B mRNA editing enzyme catalytic subunit 3F	22q13.1	-0.0532913	2.96546	0.908118	1
NM_021822	APOBEC3G	APOBEC3G	apolipoprotein B mRNA editing enzyme catalytic subunit 3G	22q13.1	0.966306	0.838201	0.0477573	0.312277
NM_001166003	APOBEC3H	APOBEC3H	apolipoprotein B mRNA editing enzyme catalytic subunit 3H	22q13.1	1.91768	-2.56456	0.246697	0.784078
NM_002612	PDK4	PDK4	pyruvate dehydrogenase kinase 4	7q21.3	-6.06615	5.48625	5.49091e-30	4.44262e-27
NM_001645	APOC1	APOC1	apolipoprotein C1	19q13.32	-0.210913	-1.78041	1	1
NR_028414	APOC1P1	APOC1P1	apolipoprotein C1 pseudogene 1	19q13.32	-0.0318275	-3.03343	1	1
NM_000041	APOE	APOE	apolipoprotein E	19q13.32	-1.50441	-0.223182	0.00631947	0.0700828
NM_000042	APOH	APOH	apolipoprotein H	17q24.2	1.85579	-3.03482	1	1
NM_001136540	APOL1	APOL1	apolipoprotein L1	22q12.3	0.0376236	7.70799	0.928546	1
NM_145637	APOL2	APOL2	apolipoprotein L2	22q12.3	0.00595287	6.75225	0.989169	1
NR_027834	APOL3	APOL3	apolipoprotein L3	22q12.3	0.97172	2.14825	0.0290307	0.221225
NM_145660	APOL4	APOL4	apolipoprotein L4	22q12.3	-1.31837	-1.87398	0.208521	0.73173
NM_030641	APOL6	APOL6	apolipoprotein L6	22q12.3	-0.664523	5.54886	0.11481	0.537755
NM_001130415	APOLD1	APOLD1	apolipoprotein L domain containing 1	12p13.1	0.0899846	2.71714	0.837408	1
NR_045828	APOM	APOM	apolipoprotein M	6p21.33	0.652463	0.723934	0.175644	0.670611
NR_026545	APOO	APOO	apolipoprotein O	Xp22.11	-0.648135	3.7492	0.129618	0.578483
NM_198450	APOOL	APOOL	apolipoprotein O like	Xq21.1	0.0218546	4.2149	0.962605	1
NM_032374	APOPT1	APOPT1	apoptogenic 1, mitochondrial	14q32.33	0.331883	4.54158	0.43284	0.944597
NM_000484	APP	APP	amyloid beta precursor protein	21q21.3	-0.849242	10.6283	0.0433366	0.291769
NM_006380	APPBP2	APPBP2	amyloid beta precursor protein binding protein 2	17q23.2	0.0200615	5.35932	0.963127	1
NM_012096	APPL1	APPL1	adaptor protein, phosphotyrosine interacting with PH domain and leucine zipper 1	3p14.3	0.099503	6.38656	0.812696	1
NM_181675	PPP2R2B	PPP2R2B	protein phosphatase 2 regulatory subunit Bbeta	5q32	-6.0579	-0.0662073	1.65399e-12	1.60307e-10
NM_001030018	APRT	APRT	adenine phosphoribosyltransferase	16q24.3	0.149324	6.63293	0.721656	1
NM_001195248	APTX	APTX	aprataxin	9p21.1	-0.345073	5.19992	0.412515	0.928045
NM_020647	JPH1	JPH1	junctophilin 1	8q21.11	-6.05655	2.01896	1.10387e-21	3.95038e-19
NM_173039	AQP11	AQP11	aquaporin 11	11q14.1	-0.947561	0.440341	0.0611708	0.369227
NM_015204	THSD7A	THSD7A	thrombospondin type 1 domain containing 7A	7p21.3	-6.04558	1.62696	1.78599e-20	5.03567e-18
NM_001650	AQP4	AQP4	aquaporin 4	18q11.2	0.962449	0.0675202	0.0807703	0.433032
NM_001651	AQP5	AQP5	aquaporin 5	12q13.12	-1.89861	-3.03235	1	1
NM_001652	AQP6	AQP6	aquaporin 6	12q13.12	1.85535	-3.03501	1	1
NM_001170	AQP7	AQP7	aquaporin 7	9p13.3	0.484447	-2.79934	1	1
NR_002817	AQP7P1	AQP7P1	aquaporin 7 pseudogene 1	9q13	-0.395963	-2.61254	1	1
NR_026558	AQP7P3	AQP7P3	aquaporin 7 pseudogene 3	9q21.11	-1.20343	-2.82512	1	1
NM_001169	AQP8	AQP8	aquaporin 8	16p12.1	-1.88266	-3.03879	1	1
NM_020980	AQP9	AQP9	aquaporin 9	15q21.3	-1.01173	-2.13759	0.440693	0.948514
NM_173800	AQPEP	LVRN	laeverin	5q23.1	0.945771	-1.99887	0.237763	0.775678
NM_014691	AQR	AQR	aquarius intron-binding spliceosomal factor	15q14	0.393438	5.85883	0.348838	0.88248
NM_000044	AR	AR	androgen receptor	Xq12	2.80146	-2.81967	0.265211	0.794151
NM_001256197	ARAF	ARAF	A-Raf proto-oncogene, serine/threonine kinase	Xp11.3	0.383941	6.14322	0.360372	0.894871
NM_001040118	ARAP1	ARAP1	ArfGAP with RhoGAP domain, ankyrin repeat and PH domain 1	11q13.4	-0.170892	6.61579	0.683494	1
NM_015230	ARAP2	ARAP2	ArfGAP with RhoGAP domain, ankyrin repeat and PH domain 2	4p14	0.319128	4.07218	0.453044	0.956837
NM_022481	ARAP3	ARAP3	ArfGAP with RhoGAP domain, ankyrin repeat and PH domain 3	5q31.3	0.670847	5.47906	0.111273	0.52649
NM_015193	ARC	ARC	activity regulated cytoskeleton associated protein	8q24.3	-0.838981	-2.82404	1	1
NM_001655	ARCN1	ARCN1	archain 1	11q23.3	0.174752	7.59829	0.676081	1
NM_019111_4	HLA-DRA	HLA-DRA	major histocompatibility complex, class II, DR alpha	6p21.32	-6.04226	-1.56968	5.9787e-06	0.00018239
NM_001658	ARF1	ARF1	ADP ribosylation factor 1	1q42.13	-0.202598	8.78381	0.627735	1
NM_001659	ARF3	ARF3	ADP ribosylation factor 3	12q13.12	0.307721	7.84993	0.461849	0.962487
NM_001660	ARF4	ARF4	ADP ribosylation factor 4	3p14.3	-0.172314	8.14609	0.680105	1
NM_001662	ARF5	ARF5	ADP ribosylation factor 5	7q32.1	-0.00353273	6.99704	0.993569	1
NM_001663	ARF6	ARF6	ADP ribosylation factor 6	14q21.3	0.618559	7.65145	0.140256	0.59563
NM_175609	ARFGAP1	ARFGAP1	ADP ribosylation factor GTPase activating protein 1	20q13.33	-0.42045	7.45757	0.315333	0.856736
NM_032389	ARFGAP2	ARFGAP2	ADP ribosylation factor GTPase activating protein 2	11p11.2	0.0267508	6.40363	0.949593	1
NM_014570	ARFGAP3	ARFGAP3	ADP ribosylation factor GTPase activating protein 3	22q13.2	0.27177	6.30036	0.516937	0.971043
NM_006421	ARFGEF1	ARFGEF1	ADP ribosylation factor guanine nucleotide exchange factor 1	8q13.2	0.242599	6.32991	0.562705	0.9968
NM_006420	ARFGEF2	ARFGEF2	ADP ribosylation factor guanine nucleotide exchange factor 2	20q13.13	-0.143192	6.57713	0.732785	1
NM_014447	ARFIP1	ARFIP1	ADP ribosylation factor interacting protein 1	4q31.3	0.0729444	5.0169	0.863829	1
NM_001242855	ARFIP2	ARFIP2	ADP ribosylation factor interacting protein 2	11p15.4	0.280735	5.68726	0.50403	0.967235
NM_003224	ARFRP1	ARFRP1	ADP ribosylation factor related protein 1	20q13.33	-0.124808	5.66877	0.766964	1
NM_001200056	NPL	NPL	N-acetylneuraminate pyruvate lyase	1q25.3	-6.03766	-1.56624	5.9787e-06	0.00018239
NM_001012659	ARGFX	ARGFX	arginine-fifty homeobox	3q13.33	-1.05637	-3.10446	1	1
NR_002222	ARGFXP2	ARGFXP2	arginine-fifty homeobox pseudogene 2	17q11.2	-1.90344	-3.0303	1	1
NM_018011	ARGLU1	ARGLU1	arginine and glutamate rich 1	13q33.3	0.398728	6.81825	0.341299	0.876327
NM_004308	ARHGAP1	ARHGAP1	Rho GTPase activating protein 1	11p11.2	-0.265567	7.30006	0.525649	0.97799
NM_024605	ARHGAP10	ARHGAP10	Rho GTPase activating protein 10	4q31.23	0.809824	4.54941	0.0565732	0.351002
NM_199357	ARHGAP11A	ARHGAP11A	Rho GTPase activating protein 11A	15q13.3	0.29277	6.76915	0.484279	0.967235
NM_001039841	ARHGAP11B	ARHGAP11B	Rho GTPase activating protein 11B	15q13.2	0.463019	3.64486	0.276393	0.806175
NM_018287	ARHGAP12	ARHGAP12	Rho GTPase activating protein 12	10p11.22	-0.358058	5.37518	0.394902	0.91818
NM_018460	ARHGAP15	ARHGAP15	Rho GTPase activating protein 15	2q22.2-q22.3	-3.21637	-2.81763	0.265211	0.794151
NM_018054	ARHGAP17	ARHGAP17	Rho GTPase activating protein 17	16p12.1	0.207547	6.28996	0.620663	1
NM_033515	ARHGAP18	ARHGAP18	Rho GTPase activating protein 18	6q22.33	0.970193	6.13972	0.0216502	0.179301
NM_001204300	ARHGAP19	ARHGAP19	Rho GTPase activating protein 19	10q24.1	0.234185	4.59463	0.578819	1
NR_037909	ARHGAP19-SLIT1	ARHGAP19-SLIT1	ARHGAP19-SLIT1 readthrough (NMD candidate)	10q24.1	0.695777	2.4974	0.112182	0.528907
NM_020809	ARHGAP20	ARHGAP20	Rho GTPase activating protein 20	11q22.3-q23.1	-1.89861	-3.03235	1	1
NM_020824	ARHGAP21	ARHGAP21	Rho GTPase activating protein 21	10p12.1	0.00258716	6.8982	0.995507	1
NM_001256024	ARHGAP22	ARHGAP22	Rho GTPase activating protein 22	10q11.22-q11.23	0.57251	5.79892	0.173302	0.664494
NM_001199417	ARHGAP23	ARHGAP23	Rho GTPase activating protein 23	17q12	-0.287873	5.59995	0.493319	0.967235
NM_001025616	ARHGAP24	ARHGAP24	Rho GTPase activating protein 24	4q21.23-q21.3	-0.534314	4.39258	0.207322	0.730137
NM_001007231	ARHGAP25	ARHGAP25	Rho GTPase activating protein 25	2p13.3	0.742195	-2.82663	1	1
NM_015071	ARHGAP26	ARHGAP26	Rho GTPase activating protein 26	5q31.3	0.959937	5.63124	0.0233151	0.187504
NM_199282_1	ARHGAP27	ARHGAP27	Rho GTPase activating protein 27	17q21.31	-1.20253	5.68319	0.00468254	0.0553253
NM_001010000	ARHGAP28	ARHGAP28	Rho GTPase activating protein 28	18p11.31	-1.88266	-3.03879	1	1
NM_004815	ARHGAP29	ARHGAP29	Rho GTPase activating protein 29	1p22.1	0.0434867	8.79422	0.917223	1
NM_181720	ARHGAP30	ARHGAP30	Rho GTPase activating protein 30	1q23.3	1.93099	-1.92601	0.0448633	0.298059
NM_020754	ARHGAP31	ARHGAP31	Rho GTPase activating protein 31	3q13.32-q13.33	0.461454	4.32317	0.275499	0.805607
NM_014715	ARHGAP32	ARHGAP32	Rho GTPase activating protein 32	11q24.3	0.18357	4.35454	0.665672	1
NM_001172630	ARHGAP33	ARHGAP33	Rho GTPase activating protein 33	19q13.12	0.18715	5.6785	0.6559	1
NM_004491	ARHGAP35	ARHGAP35	Rho GTPase activating protein 35	19q13.32	0.50291	7.24695	0.2301	0.764359
NM_025251	ARHGAP39	ARHGAP39	Rho GTPase activating protein 39	8q24.3	-0.36127	3.23082	0.403822	0.921032
NM_001666	ARHGAP4	ARHGAP4	Rho GTPase activating protein 4	Xq28	-0.786513	0.610629	0.105981	0.511735
NM_153764	KCNJ1	KCNJ1	potassium voltage-gated channel subfamily J member 1	11q24.3	-6.03736	1.11721	6.95044e-18	1.36148e-15
NM_152432	ARHGAP42	ARHGAP42	Rho GTPase activating protein 42	11q22.1	0.434435	3.29722	0.311952	0.853943
NM_014859	ARHGAP44	ARHGAP44	Rho GTPase activating protein 44	17p12	-2.02635	-2.55709	0.246697	0.784078
NM_001173	ARHGAP5	ARHGAP5	Rho GTPase activating protein 5	14q12	0.405446	6.69813	0.333253	0.868072
NR_027263	ARHGAP5-AS1	ARHGAP5-AS1	ARHGAP5 antisense RNA 1 (head to head)	14q12	-0.747885	1.83627	0.0983594	0.486025
NM_013423	ARHGAP6	ARHGAP6	Rho GTPase activating protein 6	Xp22.2	-0.607451	2.28107	0.167829	0.653783
NR_026797	LINC00520	LINC00520	long intergenic non-protein coding RNA 520	14q22.3	-6.03655	1.75928	1.31573e-20	3.88643e-18
NM_001080157	ARHGAP9	ARHGAP9	Rho GTPase activating protein 9	12q13.3	2.39163	-2.41777	0.0930693	0.471951
NM_001185078	ARHGDIA	ARHGDIA	Rho GDP dissociation inhibitor alpha	17q25.3	-0.0667127	9.5176	0.873098	1
NM_001175	ARHGDIB	ARHGDIB	Rho GDP dissociation inhibitor beta	12p12.3	-0.301735	4.79502	0.474504	0.967235
NM_001176	ARHGDIG	ARHGDIG	Rho GDP dissociation inhibitor gamma	16p13.3	-2.69947	-2.92124	0.51014	0.967235
NM_004706	ARHGEF1	ARHGEF1	Rho guanine nucleotide exchange factor 1	19q13.2	-0.24667	7.32874	0.555473	0.991254
NM_014629	ARHGEF10	ARHGEF10	Rho guanine nucleotide exchange factor 10	8p23.3	0.345321	6.22306	0.41021	0.925836
NM_018125	ARHGEF10L	ARHGEF10L	Rho guanine nucleotide exchange factor 10 like	1p36.13	-0.771059	5.96279	0.06733	0.389113
NM_198236	ARHGEF11	ARHGEF11	Rho guanine nucleotide exchange factor 11	1q23.1	-0.384792	5.98408	0.35936	0.893057
NM_015313	ARHGEF12	ARHGEF12	Rho guanine nucleotide exchange factor 12	11q23.3	0.383385	7.76393	0.359552	0.893072
NM_014448	ARHGEF16	ARHGEF16	Rho guanine nucleotide exchange factor 16	1p36.32	-0.236077	5.03914	0.574996	1
NM_014786	ARHGEF17	ARHGEF17	Rho guanine nucleotide exchange factor 17	11q13.4	0.187672	6.39231	0.654353	1
NM_015318	ARHGEF18	ARHGEF18	Rho/Rac guanine nucleotide exchange factor 18	19p13.2	-0.511594	6.08196	0.223256	0.752094
NM_153213	ARHGEF19	ARHGEF19	Rho guanine nucleotide exchange factor 19	1p36.13	0.425505	2.8827	0.326211	0.862969
NM_004723	ARHGEF2	ARHGEF2	Rho/Rac guanine nucleotide exchange factor 2	1q22	-0.254102	6.57614	0.544321	0.986337
NM_001111270	ARHGEF25	ARHGEF25	Rho guanine nucleotide exchange factor 25	12q13.3	0.823124	-0.162164	0.140378	0.59563
NM_170672	RASGRP3	RASGRP3	RAS guanyl releasing protein 3	2p22.3	-5.95914	0.564221	2.71991e-15	3.98542e-13
NR_037901	ARHGEF26-AS1	ARHGEF26-AS1	ARHGEF26 antisense RNA 1	3q25.2	-1.90344	-3.0303	1	1
NM_001128616	ARHGEF3	ARHGEF3	Rho guanine nucleotide exchange factor 3	3p14.3	-0.803857	3.57418	0.0609366	0.368531
NM_001145451	ARHGEF33	ARHGEF33	Rho guanine nucleotide exchange factor 33	2p22.1	0.259047	-2.34734	1	1
NM_001003702	ARHGEF35	ARHGEF35	Rho guanine nucleotide exchange factor 35	7q35	-0.497044	4.64119	0.239635	0.777793
NM_001001669	ARHGEF37	ARHGEF37	Rho guanine nucleotide exchange factor 37	5q32	0.435298	4.47471	0.302928	0.843506
NM_001001523	RORC	RORC	RAR related orphan receptor C	1q21	-5.95862	0.563766	2.71991e-15	3.98542e-13
NM_175878	XKR3	XKR3	XK related 3	22q11.1	-5.94093	1.02362	2.67473e-17	5.02769e-15
NM_018071	ARHGEF40	ARHGEF40	Rho guanine nucleotide exchange factor 40	14q11.2	0.937342	6.95822	0.0262294	0.206561
NM_005435	ARHGEF5	ARHGEF5	Rho guanine nucleotide exchange factor 5	7q35	-0.452374	5.58016	0.281985	0.814317
NM_004840	ARHGEF6	ARHGEF6	Rac/Cdc42 guanine nucleotide exchange factor 6	Xq26.3	-0.654891	3.57508	0.12697	0.57142
NM_001113512	ARHGEF7	ARHGEF7	Rho guanine nucleotide exchange factor 7	13q34	0.334847	5.70252	0.425494	0.939043
NM_001173479	ARHGEF9	ARHGEF9	Cdc42 guanine nucleotide exchange factor 9	Xq11.1	-0.234771	4.04078	0.580626	1
NM_006015	ARID1A	ARID1A	AT-rich interaction domain 1A	1p36.11	0.535392	7.12603	0.201597	0.719232
NM_020732	ARID1B	ARID1B	AT-rich interaction domain 1B	6q25.3	0.659957	6.27733	0.116429	0.54247
NM_152641	ARID2	ARID2	AT-rich interaction domain 2	12q12	0.587145	4.8734	0.16425	0.646624
NM_005224	ARID3A	ARID3A	AT-rich interaction domain 3A	19p13.3	0.0459563	3.00556	0.916926	1
NM_006465	ARID3B	ARID3B	AT-rich interaction domain 3B	15q24.1	0.470168	3.9335	0.268836	0.79959
NM_001017363	ARID3C	ARID3C	AT-rich interaction domain 3C	9p13.3	-1.22579	-2.48469	0.484513	0.967235
NM_023001	ARID4A	ARID4A	AT-rich interaction domain 4A	14q23.1	0.369005	4.29916	0.384039	0.913302
NM_001206794	ARID4B	ARID4B	AT-rich interaction domain 4B	1q42.3	0.0639354	5.54498	0.879782	1
NM_212481	ARID5A	ARID5A	AT-rich interaction domain 5A	2q11.2	0.555823	3.77215	0.191442	0.70198
NM_032199	ARID5B	ARID5B	AT-rich interaction domain 5B	10q21.2	-0.518874	5.02916	0.218684	0.743251
NM_005744	ARIH1	ARIH1	ariadne RBR E3 ubiquitin protein ligase 1	15q24.1	0.274873	5.75194	0.512695	0.967964
NM_006321	ARIH2	ARIH2	ariadne RBR E3 ubiquitin protein ligase 2	3p21.31	0.205666	6.47661	0.623648	1
NM_001177	ARL1	ARL1	ADP ribosylation factor like GTPase 1	12q23.2	-0.486322	6.12154	0.246835	0.784251
NM_173664	ARL10	ARL10	ADP ribosylation factor like GTPase 10	5q35.2	0.636521	2.5347	0.145686	0.606777
NM_001162490	ARL13A	ARL13A	ADP ribosylation factor like GTPase 13A	Xq22.1	2.64123	-2.92815	0.51014	0.967235
NR_033427	ARL13B	ARL13B	ADP ribosylation factor like GTPase 13B	3q11.1-q11.2	-0.331192	4.41171	0.434365	0.945584
NM_005127	CLEC2B	CLEC2B	C-type lectin domain family 2 member B	12p13.31	-5.88776	-1.66985	2.11401e-05	0.000563606
NM_019087	ARL15	ARL15	ADP ribosylation factor like GTPase 15	5q11.2	0.563592	2.47105	0.200041	0.715328
NM_001040025	ARL16	ARL16	ADP ribosylation factor like GTPase 16	17q25.3	0.132666	5.1003	0.753439	1
NM_016632	ARL17A	ARL17A	ADP ribosylation factor like GTPase 17A	17q21.31	-0.341387	4.31605	0.420804	0.935451
NM_001103154	ARL17B	ARL17B	ADP ribosylation factor like GTPase 17B	17q21.31	-0.0341572	1.36544	0.961183	1
NM_001199745	ARL2	ARL2	ADP ribosylation factor like GTPase 2	11q13.1	-0.309431	6.05996	0.460936	0.962487
NR_037650	ARL2-SNX15	ARL2-SNX15	ARL2-SNX15 readthrough (NMD candidate)	11q13.1	-0.259571	5.75136	0.536737	0.984767
NM_012106	ARL2BP	ARL2BP	ADP ribosylation factor like GTPase 2 binding protein	16q13	-0.395989	6.36741	0.345107	0.879138
NM_004311	ARL3	ARL3	ADP ribosylation factor like GTPase 3	10q24.32	0.391005	4.86473	0.354287	0.888556
NM_001037164	ARL4A	ARL4A	ADP ribosylation factor like GTPase 4A	7p21.3	0.155057	4.13849	0.717905	1
NM_005737	ARL4C	ARL4C	ADP ribosylation factor like GTPase 4C	2q37.1	0.905546	8.78321	0.0314266	0.234584
NM_001661	ARL4D	ARL4D	ADP ribosylation factor like GTPase 4D	17q21.31	-0.593314	5.20861	0.159468	0.636522
NM_177985	ARL5A	ARL5A	ADP ribosylation factor like GTPase 5A	2q23.3	0.0775941	4.86273	0.855318	1
NM_178815	ARL5B	ARL5B	ADP ribosylation factor like GTPase 5B	10p12.31	0.0877585	4.02824	0.839361	1
NM_177976	ARL6	ARL6	ADP ribosylation factor like GTPase 6	3q11.2	-0.3037	1.76959	0.502833	0.967235
NM_015161	ARL6IP1	ARL6IP1	ADP ribosylation factor like GTPase 6 interacting protein 1	16p12.3	-0.140223	8.47836	0.737251	1
NM_001002251	ARL6IP4	ARL6IP4	ADP ribosylation factor like GTPase 6 interacting protein 4	12q24.31	0.380383	6.92713	0.36377	0.898588
NM_006407	ARL6IP5	ARL6IP5	ADP ribosylation factor like GTPase 6 interacting protein 5	3p14.1	-0.00671726	6.99172	0.987496	1
NR_024526	ARL6IP6	ARL6IP6	ADP ribosylation factor like GTPase 6 interacting protein 6	2q23.3	0.9269	5.25687	0.0286473	0.219021
NM_001256129	ARL8A	ARL8A	ADP ribosylation factor like GTPase 8A	1q32.1	-0.641942	5.7303	0.127355	0.57259
NM_018184	ARL8B	ARL8B	ADP ribosylation factor like GTPase 8B	3p26.1	-0.419797	6.65633	0.316648	0.857858
NM_206919	ARL9	ARL9	ADP ribosylation factor like GTPase 9	4q12	-0.847631	-2.81972	1	1
NM_018120	ARMC1	ARMC1	armadillo repeat containing 1	8q13.1	-0.00388196	5.365	0.994066	1
NM_001161010	ARMC10	ARMC10	armadillo repeat containing 10	7q22.1	-0.0740722	5.41937	0.860932	1
NM_145028	ARMC12	ARMC12	armadillo repeat containing 12	6p21.31	-0.115259	-0.951923	0.825467	1
NM_032131	ARMC2	ARMC2	armadillo repeat containing 2	6q21	-0.654363	1.22333	0.159113	0.636214
NM_173081	ARMC3	ARMC3	armadillo repeat containing 3	10p12.2	-1.28331	-1.70368	0.141306	0.597791
NM_018076	ARMC4	ARMC4	armadillo repeat containing 4	10p12.1	-2.78495	-1.85045	0.00812155	0.0847639
NM_001105247	ARMC5	ARMC5	armadillo repeat containing 5	16p11.2	0.0882764	4.12849	0.838301	1
NM_001199196	ARMC6	ARMC6	armadillo repeat containing 6	19p13.11	-0.535673	5.99544	0.202444	0.720606
NM_024585	ARMC7	ARMC7	armadillo repeat containing 7	17q25.1	-0.269987	3.71323	0.529633	0.981067
NM_014154	ARMC8	ARMC8	armadillo repeat containing 8	3q22.3	0.199296	5.45013	0.635765	1
NM_025139	ARMC9	ARMC9	armadillo repeat containing 9	2q37.1	-0.755056	5.07239	0.0741974	0.414263
NM_001079536	ART5	ART5	ADP-ribosyltransferase 5	11p15.4	-5.88527	0.494258	6.94229e-15	9.56956e-13
NM_177949	ARMCX2	ARMCX2	armadillo repeat containing, X-linked 2	Xq22.1	-1.03491	1.09361	0.0289223	0.220671
NM_016607	ARMCX3	ARMCX3	armadillo repeat containing, X-linked 3	Xq22.1	-0.29628	5.76481	0.480412	0.967235
NR_028407	ARMCX4	ARMCX4	armadillo repeat containing, X-linked 4	Xq22.1	0.530125	2.53785	0.235065	0.773547
NM_001168480	ARMCX5	ARMCX5	armadillo repeat containing, X-linked 5	Xq22.1	-0.468813	3.35949	0.276153	0.805978
NM_001199818	ARMCX5-GPRASP2	ARMCX5-GPRASP2	ARMCX5-GPRASP2 readthrough	Xq22.1	0.203617	2.48959	0.64811	1
NR_033670	ARMCX6	ARMCX6	armadillo repeat containing, X-linked 6	Xq22.1	-0.519011	4.13953	0.220988	0.747296
NM_001099667	ARMS2	ARMS2	age-related maculopathy susceptibility 2	10q26.13	-1.68735	-2.65717	0.39961	0.91818
NM_001668	ARNT	ARNT	aryl hydrocarbon receptor nuclear translocator	1q21.3	0.333272	5.70489	0.427575	0.940748
NM_014862	ARNT2	ARNT2	aryl hydrocarbon receptor nuclear translocator 2	15q25.1	0.423491	4.12022	0.320498	0.862619
NM_001178	ARNTL	ARNTL	aryl hydrocarbon receptor nuclear translocator like	11p15.3	0.559135	4.16256	0.186765	0.692954
NM_001248004	ARNTL2	ARNTL2	aryl hydrocarbon receptor nuclear translocator like 2	12p11.23	0.826668	6.18128	0.0498392	0.322126
NM_001190996	ARPC1A	ARPC1A	actin related protein 2/3 complex subunit 1A	7q22.1	-0.032179	6.69762	0.939284	1
NM_005720	ARPC1B	ARPC1B	actin related protein 2/3 complex subunit 1B	7q22.1	-0.348847	8.16484	0.404218	0.921032
NM_152862	ARPC2	ARPC2	actin related protein 2/3 complex subunit 2	2q35	0.717427	8.70732	0.0873569	0.456636
NM_005719	ARPC3	ARPC3	actin related protein 2/3 complex subunit 3	12q24.11	0.0257076	7.61378	0.951153	1
NM_001024960	ARPC4	ARPC4	actin related protein 2/3 complex subunit 4	3p25.3	0.17387	7.41612	0.677663	1
NM_001198793	ARPC4-TTLL3	ARPC4-TTLL3	ARPC4-TTLL3 readthrough	3p25.3	0.118617	6.26741	0.777512	1
NM_005717	ARPC5	ARPC5	actin related protein 2/3 complex subunit 5	1q25.3	0.13948	7.64309	0.73872	1
NM_030978	ARPC5L	ARPC5L	actin related protein 2/3 complex subunit 5 like	9q33.3	-0.356937	5.52968	0.396004	0.91818
NM_032487	ARPM1	ACTRT3	actin related protein T3	3q26.2	0.21423	1.31102	0.668882	1
NM_006628	ARPP19	ARPP19	cAMP regulated phosphoprotein 19	15q21.2	0.528751	7.76666	0.206886	0.729434
NM_016300	ARPP21	ARPP21	cAMP regulated phosphoprotein 21	3p22.3	2.57293	-2.34845	0.0572657	0.3524
NM_004041	ARRB1	ARRB1	arrestin beta 1	11q13.4	-0.362257	4.54574	0.391997	0.91818
NM_199004	ARRB2	ARRB2	arrestin beta 2	17p13.2	0.355235	4.13055	0.405066	0.921032
NM_152285	ARRDC1	ARRDC1	arrestin domain containing 1	9q34.3	-0.542076	5.99271	0.197078	0.709777
NM_001025604	ARRDC2	ARRDC2	arrestin domain containing 2	19p13.11	0.362734	4.99987	0.390093	0.916684
NM_020801	ARRDC3	ARRDC3	arrestin domain containing 3	5q14.3	0.892996	7.41821	0.0339729	0.249193
NM_183376	ARRDC4	ARRDC4	arrestin domain containing 4	15q26.2	-0.285561	4.37986	0.499921	0.967235
NM_001085426	ARSA	ARSA	arylsulfatase A	22q13.33	-0.612096	5.01235	0.147105	0.610361
NM_000046	ARSB	ARSB	arylsulfatase B	5q14.1	-0.377324	4.65088	0.372457	0.90442
NM_001669	ARSD	ARSD	arylsulfatase D	Xp22.33	0.00321409	5.18397	0.996134	1
NM_000047	ARSE	ARSE	arylsulfatase E (chondrodysplasia punctata 1)	Xp22.33	-0.179404	3.22704	0.674084	1
NM_000715	C4BPA	C4BPA	complement component 4 binding protein alpha	1q32.2	-5.88395	-0.219547	1.20336e-11	1.11967e-09
NM_001100915	KCTD19	KCTD19	potassium channel tetramerization domain containing 19	16q22.1	-5.85418	-0.255769	1.48114e-11	1.35111e-09
NM_024590	ARSJ	ARSJ	arylsulfatase family member J	4q26	0.939414	5.50781	0.026372	0.207508
NM_198150	ARSK	ARSK	arylsulfatase family member K	5q15	-0.316472	3.6992	0.459325	0.962487
NM_001130017	ART3	ART3	ADP-ribosyltransferase 3	4q21.1	1.85535	-3.03501	1	1
NM_001101357	CCDC160	CCDC160	coiled-coil domain containing 160	Xq26.2	-5.84282	-1.70113	2.11401e-05	0.000563606
NM_057090	ARTN	ARTN	artemin	1p34.1	-0.146509	0.419403	0.820347	1
NM_022786	ARV1	ARV1	ARV1 homolog, fatty acid homeostasis modulator	1q42.2	-0.374811	3.75822	0.381894	0.911111
NM_001670	ARVCF	ARVCF	ARVCF, delta catenin family member	22q11.21	-0.0955349	4.42932	0.822699	1
NM_139058	ARX	ARX	aristaless related homeobox	Xp21.3	-1.90344	-3.0303	1	1
NM_020682	AS3MT	AS3MT	arsenite methyltransferase	10q24.32	-0.205734	-0.667864	0.780254	1
NM_001008949	ITPRIPL1	ITPRIPL1	ITPRIP like 1	2q11.2	-5.82542	-1.71083	2.11401e-05	0.000563606
NM_001143974	ASAH2	ASAH2	N-acylsphingosine amidohydrolase 2	10q11.23	-0.124452	0.0663749	0.818848	1
NM_001079516	ASAH2B	ASAH2B	N-acylsphingosine amidohydrolase 2B	10q11.23	-0.0151155	0.155027	1	1
NM_001247996	ASAP1	ASAP1	ArfGAP with SH3 domain, ankyrin repeat and PH domain 1	8q24.21-q24.22	0.369977	6.78736	0.37721	0.906715
NR_002765	ASAP1-IT1	ASAP1-IT1	ASAP1 intronic transcript 1	8q24.21	-1.90344	-3.0303	1	1
NM_003887	ASAP2	ASAP2	ArfGAP with SH3 domain, ankyrin repeat and PH domain 2	2p25.1	0.717675	7.23674	0.0875807	0.457677
NM_018661	DEFB103B	DEFB103B	defensin beta 103B	8p23.1	-5.81597	-1.72294	2.11401e-05	0.000563606
NM_001040445	ASB1	ASB1	ankyrin repeat and SOCS box containing 1	2q37.3	0.96387	5.94735	0.0226172	0.185098
NM_080873	ASB11	ASB11	ankyrin repeat and SOCS box containing 11	Xp22.2	1.85579	-3.03482	1	1
NM_130388	ASB12	ASB12	ankyrin repeat and SOCS box containing 12	Xq11.2	1.93363	-2.57048	0.246697	0.784078
NR_037164	ASB13	ASB13	ankyrin repeat and SOCS box containing 13	10p15.1	-0.131412	4.65189	0.75668	1
NM_001142733	ASB14	ASB14	ankyrin repeat and SOCS box containing 14	3p14.3	-1.35187	-2.72905	0.639766	1
NM_080863	ASB16	ASB16	ankyrin repeat and SOCS box containing 16	17q21.31	-0.428516	-2.48319	1	1
NM_001202429	ASB2	ASB2	ankyrin repeat and SOCS box containing 2	14q32.12	-1.2647	1.9112	0.00516873	0.0595204
NM_145863	ASB3	ASB3	ankyrin repeat and SOCS box containing 3	2p16.2	0.318251	3.9765	0.457217	0.961179
NM_016116	ASB4	ASB4	ankyrin repeat and SOCS box containing 4	7q21.3	-3.88719	-2.63708	0.0755461	0.414611
NM_080874	ASB5	ASB5	ankyrin repeat and SOCS box containing 5	4q34.2	-0.953558	-2.55333	0.705436	1
NM_177999	ASB6	ASB6	ankyrin repeat and SOCS box containing 6	9q34.11	-0.400988	5.65036	0.340037	0.876007
NM_024708	ASB7	ASB7	ankyrin repeat and SOCS box containing 7	15q26.3	0.124926	4.3492	0.769137	1
NM_024095	ASB8	ASB8	ankyrin repeat and SOCS box containing 8	12q13.11	0.420467	4.08697	0.322113	0.862969
NM_001031739	ASB9	ASB9	ankyrin repeat and SOCS box containing 9	Xp22.2	-0.493655	2.87103	0.257436	0.794151
NR_033769	ASB9P1	ASB9P1	ankyrin repeat and SOCS box containing 9 pseudogene 1	15q26.1	-0.389432	-2.22959	1	1
NM_001198800	ASCC1	ASCC1	activating signal cointegrator 1 complex subunit 1	10q22.1	-0.0190708	4.73779	0.965629	1
NM_001242906	ASCC2	ASCC2	activating signal cointegrator 1 complex subunit 2	22q12.2	0.0569038	6.26944	0.89249	1
NM_006828	ASCC3	ASCC3	activating signal cointegrator 1 complex subunit 3	6q16.3	0.505634	6.14262	0.228441	0.76061
NM_014034	ASF1A	ASF1A	anti-silencing function 1A histone chaperone	6q22.31	-0.249228	4.24265	0.557656	0.992495
NM_018154	ASF1B	ASF1B	anti-silencing function 1B histone chaperone	19p13.12	-0.260616	6.75674	0.533718	0.983345
NM_001197216	ASGR1	ASGR1	asialoglycoprotein receptor 1	17p13.1	0.877509	-1.18599	0.196068	0.708088
NM_018489	ASH1L	ASH1L	ASH1 like histone lysine methyltransferase	1q22	0.326583	5.90477	0.436403	0.947722
NM_004674	ASH2L	ASH2L	ASH2 like histone lysine methyltransferase complex subunit	8p11.23	0.153178	5.63545	0.715486	1
NM_000048	ASL	ASL	argininosuccinate lyase	7q11.21	0.0551151	6.12814	0.896007	1
NM_004043	ASMT	ASMT	acetylserotonin O-methyltransferase	Xp22.3 and Yp11.3	-0.0145641	1.80259	0.985536	1
NM_001173474	ASMTL	ASMTL	acetylserotonin O-methyltransferase like	Xp22.3 and Yp11.3	0.439725	4.79464	0.298398	0.836655
NR_026710_1	ASMTL-AS1	ASMTL-AS1	ASMTL antisense RNA 1	Xp22.33 and Yp11.32	-0.112222	4.7924	0.790837	1
NM_004317	ASNA1	ASNA1	arsA arsenite transporter, ATP-binding, homolog 1 (bacterial)	19p13.13	-0.611082	6.83019	0.145506	0.606161
NM_133436	ASNS	ASNS	asparagine synthetase (glutamine-hydrolyzing)	7q21.3	1.13255	5.58768	0.00770006	0.081554
NM_019048	ASNSD1	ASNSD1	asparagine synthetase domain containing 1	2q32.2	0.408234	5.18274	0.332669	0.867747
NM_001080464	ASPG	ASPG	asparaginase	14q32.33	1.18248	1.34721	0.0106481	0.10473
NM_001164750	ASPH	ASPH	aspartate beta-hydroxylase	8q12.3	0.497264	8.75502	0.234816	0.773515
NM_181718	ASPHD1	ASPHD1	aspartate beta-hydroxylase domain containing 1	16p11.2	0.201034	4.51246	0.636284	1
NM_020437	ASPHD2	ASPHD2	aspartate beta-hydroxylase domain containing 2	22q12.1	1.12163	3.85508	0.0090856	0.0921886
NM_001206846	ASPM	ASPM	abnormal spindle microtubule assembly	1q31.3	0.215273	7.12962	0.606733	1
NM_152792	ASPRV1	ASPRV1	aspartic peptidase retroviral like 1	2p13.3	-0.0404394	-1.83277	1	1
NM_024083	ASPSCR1	ASPSCR1	ASPSCR1, UBX domain containing tether for SLC2A4	17q25.3	-0.369428	4.87426	0.381422	0.910569
NM_025080	ASRGL1	ASRGL1	asparaginase like 1	11q12.3	-0.673031	1.89201	0.136899	0.59563
NM_001081551	DEFB103A	DEFB103A	defensin beta 103A	8p23.1	-5.73588	-1.77299	3.27046e-05	0.000819369
NM_014065	ASTE1	ASTE1	asteroid homolog 1	3q22.1	-0.0510548	3.02585	0.911885	1
NM_004319	ASTN1	ASTN1	astrotactin 1	1q25.2	-2.65941	-2.33641	0.0572657	0.3524
NM_001184734	ASTN2	ASTN2	astrotactin 2	9q33.1	0.163857	2.98325	0.714067	1
NM_018164	ASUN	INTS13	integrator complex subunit 13	12p11.23	0.230288	4.96664	0.585029	1
NM_015338	ASXL1	ASXL1	additional sex combs like 1, transcriptional regulator	20q11.21	0.314585	7.32629	0.452166	0.956458
NM_018263	ASXL2	ASXL2	additional sex combs like 2, transcriptional regulator	2p23.3	0.364262	5.24597	0.386609	0.915669
NM_032810	ATAD1	ATAD1	ATPase family, AAA domain containing 1	10q23.31	-0.0880942	5.62031	0.834502	1
NM_014109	ATAD2	ATAD2	ATPase family, AAA domain containing 2	8q24.13	0.444157	6.99374	0.289136	0.82397
NM_017552	ATAD2B	ATAD2B	ATPase family, AAA domain containing 2B	2p24.1-p23.3	0.252768	3.31028	0.561542	0.995688
NM_018188	ATAD3A	ATAD3A	ATPase family, AAA domain containing 3A	1p36.33	-0.321194	6.20034	0.443824	0.950978
NM_031921	ATAD3B	ATAD3B	ATPase family, AAA domain containing 3B	1p36.33	-0.175482	5.81104	0.676159	1
NM_001039211	ATAD3C	ATAD3C	ATPase family, AAA domain containing 3C	1p36.33	-0.161473	1.76025	0.736692	1
NM_024857	ATAD5	ATAD5	ATPase family, AAA domain containing 5	17q11.2	0.538438	4.40103	0.204146	0.724438
NM_024909_6	ATAT1	ATAT1	alpha tubulin acetyltransferase 1	6p21.33	0.29252	3.92322	0.490347	0.967235
NM_033064	ATCAY	ATCAY	ATCAY, caytaxin	19p13.3	0.615809	-2.97927	1	1
NM_001001976	ATE1	ATE1	arginyltransferase 1	10q26.13	0.199052	3.99489	0.639579	1
NM_005171	ATF1	ATF1	activating transcription factor 1	12q13.12	0.589119	4.6799	0.16344	0.644622
NR_045774	ATF2	ATF2	activating transcription factor 2	2q31.1	0.366949	5.6524	0.382402	0.911381
NM_001030287	ATF3	ATF3	activating transcription factor 3	1q32.3	0.485214	3.78293	0.253056	0.793314
NM_182810	ATF4	ATF4	activating transcription factor 4	22q13.1	0.948322	8.40129	0.0243812	0.194225
NM_012068	ATF5	ATF5	activating transcription factor 5	19q13.33	-0.138396	5.50467	0.742599	1
NM_007348	ATF6	ATF6	activating transcription factor 6	1q23.3	0.227783	6.39737	0.586894	1
NM_004381_3	ATF6B	ATF6B	activating transcription factor 6 beta	6p21.3	0.257051	7.01282	0.539051	0.985868
NM_001130059	ATF7	ATF7	activating transcription factor 7	12q13.13	0.357858	5.85601	0.393778	0.91818
NM_018179	ATF7IP	ATF7IP	activating transcription factor 7 interacting protein	12p13.1	-0.0539419	5.12237	0.899718	1
NM_001256160	ATF7IP2	ATF7IP2	activating transcription factor 7 interacting protein 2	16p13.2-p13.13	-0.244216	1.94828	0.598195	1
NM_001131028	ATG10	ATG10	autophagy related 10	5q14.1-q14.2	0.758301	2.8395	0.0813237	0.434622
NR_033362	ATG12	ATG12	autophagy related 12	5q22.3	0.368446	5.4417	0.380828	0.909762
NM_001205121	ATG13	ATG13	autophagy related 13	11p11.2	0.026425	5.88689	0.950639	1
NM_014924	ATG14	ATG14	autophagy related 14	14q22.3	0.220706	4.43695	0.602378	1
NM_001190266	ATG16L1	ATG16L1	autophagy related 16 like 1	2q37.1	-0.0534737	5.3189	0.900028	1
NM_033388	ATG16L2	ATG16L2	autophagy related 16 like 2	11q13.4	0.209235	6.28992	0.618033	1
NM_015104	ATG2A	ATG2A	autophagy related 2A	11q13.1	-0.822504	5.90504	0.0512068	0.328702
NM_018036	ATG2B	ATG2B	autophagy related 2B	14q32.2	0.326897	5.29821	0.437428	0.948067
NM_022488	ATG3	ATG3	autophagy related 3	3q13.2	-0.175676	5.65538	0.676107	1
NM_052936	ATG4A	ATG4A	autophagy related 4A cysteine peptidase	Xq22.3	-0.673765	3.21211	0.117356	0.544753
NM_178326	ATG4B	ATG4B	autophagy related 4B cysteine peptidase	2q37.3	-0.00766259	5.84532	0.986349	1
NM_178221	ATG4C	ATG4C	autophagy related 4C cysteine peptidase	1p31.3	-0.0612044	3.45482	0.887476	1
NM_032885	ATG4D	ATG4D	autophagy related 4D cysteine peptidase	19p13.2	-0.553109	4.48003	0.191624	0.702196
NM_004849	ATG5	ATG5	autophagy related 5	6q21	0.419109	5.51516	0.31885	0.860423
NM_001136031	ATG7	ATG7	autophagy related 7	3p25.3	0.63334	5.14375	0.133438	0.588841
NM_001077198	ATG9A	ATG9A	autophagy related 9A	2q35	0.509479	6.38653	0.224799	0.755276
NM_173681	ATG9B	ATG9B	autophagy related 9B	7q36.1	-1.72208	-0.854331	0.00800379	0.0840059
NM_025092	ATHL1	PGGHG	protein-glucosylgalactosylhydroxylysine glucosidase	11p15.5	-0.496035	5.86796	0.237908	0.775701
NM_004044	ATIC	ATIC	5-aminoimidazole-4-carboxamide ribonucleotide formyltransferase/IMP cyclohydrolase	2q35	-0.0579098	6.71018	0.890336	1
NM_020864	NYAP2	NYAP2	neuronal tyrosine-phosphorylated phosphoinositide-3-kinase adaptor 2	2q36.3	-5.72032	-1.78139	5.10099e-05	0.00120005
NM_001135673	ATL2	ATL2	atlastin GTPase 2	2p22.2-p22.1	0.216852	5.23516	0.60661	1
NM_015459	ATL3	ATL3	atlastin GTPase 3	11q13.1	0.570623	5.06302	0.176184	0.671573
NM_000051	ATM	ATM	ATM serine/threonine kinase	11q22.3	-0.464102	6.08821	0.269039	0.79959
NM_015251	ATMIN	ATMIN	ATM interactor	16q23.2	-0.0367772	5.85577	0.930992	1
NM_001007026	ATN1	ATN1	atrophin 1	12p13.31	0.065193	8.0351	0.876131	1
NM_145178	ATOH7	ATOH7	atonal bHLH transcription factor 7	10q21.3	-0.0227002	-2.74334	1	1
NM_003081	SNAP25	SNAP25	synaptosome associated protein 25	20p12.2	-5.70835	2.07245	8.24989e-21	2.51676e-18
NM_004045	ATOX1	ATOX1	antioxidant 1 copper chaperone	5q33.1	0.173061	5.37471	0.680625	1
NM_024490	ATP10A	ATP10A	ATPase phospholipid transporting 10A (putative)	15q12	0.75945	5.17775	0.072618	0.407957
NM_020453	ATP10D	ATP10D	ATPase phospholipid transporting 10D (putative)	4p12	-0.535026	5.4884	0.203745	0.723941
NM_015205	ATP11A	ATP11A	ATPase phospholipid transporting 11A	13q34	-0.339582	6.92681	0.417428	0.932411
NM_014616	ATP11B	ATP11B	ATPase phospholipid transporting 11B (putative)	3q26.33	0.657195	6.29408	0.118051	0.547289
NM_173694	ATP11C	ATP11C	ATPase phospholipid transporting 11C	Xq27.1	-0.286732	4.73911	0.497091	0.967235
NM_020410	ATP13A1	ATP13A1	ATPase 13A1	19p13.11	-0.452424	6.66048	0.280576	0.81214
NM_001141974	ATP13A2	ATP13A2	ATPase 13A2	1p36.13	-0.244341	6.49571	0.559938	0.994644
NM_024524	ATP13A3	ATP13A3	ATPase 13A3	3q29	0.044263	7.86852	0.915832	1
NM_032279	ATP13A4	ATP13A4	ATPase 13A4	3q29	-1.3225	-2.74129	0.639766	1
NM_000701	ATP1A1	ATP1A1	ATPase Na+/K+ transporting subunit alpha 1	1p13.1	-0.132624	9.30176	0.750833	1
NR_027646	ATP1A1OS	ATP1A1-AS1	ATP1A1 antisense RNA 1	1p13.1	-0.246583	-0.0591757	0.664196	1
NM_000702	ATP1A2	ATP1A2	ATPase Na+/K+ transporting subunit alpha 2	1q23.2	-2.05809	-2.19476	0.0632029	0.375045
NM_001256214	ATP1A3	ATP1A3	ATPase Na+/K+ transporting subunit alpha 3	19q13.2	-2.65289	-2.33853	0.0572657	0.3524
NM_144699	ATP1A4	ATP1A4	ATPase Na+/K+ transporting subunit alpha 4	1q23.2	-1.89302	-3.03455	1	1
NM_001677	ATP1B1	ATP1B1	ATPase Na+/K+ transporting subunit beta 1	1q24.2	-0.482649	7.10606	0.24942	0.788552
NM_001678	ATP1B2	ATP1B2	ATPase Na+/K+ transporting subunit beta 2	17p13.1	-1.90344	-3.0303	1	1
NM_001679	ATP1B3	ATP1B3	ATPase Na+/K+ transporting subunit beta 3	3q23	-0.0598896	7.14825	0.886378	1
NM_001142447	ATP1B4	ATP1B4	ATPase Na+/K+ transporting family member beta 4	Xq24	-2.67944	-2.92961	0.51014	0.967235
NM_004320	ATP2A1	ATP2A1	ATPase sarcoplasmic/endoplasmic reticulum Ca2+ transporting 1	16p11.2	-0.487278	0.337824	0.338449	0.874051
NM_170665	ATP2A2	ATP2A2	ATPase sarcoplasmic/endoplasmic reticulum Ca2+ transporting 2	12q24.11	0.470811	8.17853	0.260679	0.794151
NM_174958	ATP2A3	ATP2A3	ATPase sarcoplasmic/endoplasmic reticulum Ca2+ transporting 3	17p13.2	1.54835	-1.68706	0.0631294	0.375045
NM_001001323	ATP2B1	ATP2B1	ATPase plasma membrane Ca2+ transporting 1	12q21.33	0.32719	6.69251	0.434628	0.945632
NM_001683	ATP2B2	ATP2B2	ATPase plasma membrane Ca2+ transporting 2	3p25.3	-1.88266	-3.03879	1	1
NM_021949	ATP2B3	ATP2B3	ATPase plasma membrane Ca2+ transporting 3	Xq28	2.64154	-2.92801	0.51014	0.967235
NM_001684	ATP2B4	ATP2B4	ATPase plasma membrane Ca2+ transporting 4	1q32.1	0.297308	7.30505	0.477308	0.967235
NM_001199180	ATP2C1	ATP2C1	ATPase secretory pathway Ca2+ transporting 1	3q22.1	0.398073	7.67927	0.341562	0.876587
NM_014861	ATP2C2	ATP2C2	ATPase secretory pathway Ca2+ transporting 2	16q24.1	-2.68493	-1.90453	0.00812155	0.0847639
NM_004046	ATP5A1	ATP5F1A	ATP synthase F1 subunit alpha	18q21.1	-0.12483	8.75417	0.765091	1
NM_001686	ATP5B	ATP5F1B	ATP synthase F1 subunit beta	12q13.3	-0.0901039	9.28874	0.829217	1
NM_001001973	ATP5C1	ATP5F1C	ATP synthase F1 subunit gamma	10p14	-0.210454	7.24541	0.614957	1
NM_001687	ATP5D	ATP5F1D	ATP synthase F1 subunit delta	19p13.3	-0.346348	6.52224	0.408624	0.924183
NM_006886	ATP5E	ATP5F1E	ATP synthase F1 subunit epsilon	20q13.32	0.043218	7.32881	0.917854	1
NR_002162	ATP5EP2	ATP5F1EP2	ATP synthase F1 subunit epsilon pseudogene 2	13q12.2	-0.0270234	3.18022	0.954563	1
NM_001688	ATP5F1	ATP5PB	ATP synthase peripheral stalk-membrane subunit b	1p13.2	-0.160575	7.0002	0.701354	1
NM_001002027	ATP5G1	ATP5MC1	ATP synthase membrane subunit c locus 1	17q21.32	-0.372081	6.1687	0.37517	0.906457
NM_001002031	ATP5G2	ATP5MC2	ATP synthase membrane subunit c locus 2	12q13.13	0.374784	7.27938	0.370579	0.903116
NM_001002258	ATP5G3	ATP5MC3	ATP synthase membrane subunit c locus 3	2q31.1	-0.359742	7.10909	0.390267	0.916748
NM_001003785	ATP5H	ATP5PD	ATP synthase peripheral stalk subunit d	17q25.1	-0.700357	6.80074	0.0956435	0.476644
NR_033743	ATP5I	ATP5ME	ATP synthase membrane subunit e	4p16.3	-0.085422	5.88564	0.839218	1
NM_001003697	ATP5J	ATP5PF	ATP synthase peripheral stalk subunit F6	21q21.3	-0.43952	6.18247	0.295012	0.83117
NM_004889	ATP5J2	ATP5MF	ATP synthase membrane subunit f	7q22.1	-0.28698	6.96422	0.493043	0.967235
NM_001198879	ATP5J2-PTCD1	ATP5MF-PTCD1	ATP5MF-PTCD1 readthrough	7q22.1	-0.458598	6.23383	0.274546	0.805607
NM_006476	ATP5L	ATP5MG	ATP synthase membrane subunit g	11q23.3	-0.207483	6.99497	0.620159	1
NM_001165877	ATP5L2	ATP5MGL	ATP synthase membrane subunit g like	22q13.2	-0.196822	2.99445	0.656444	1
NM_001697	ATP5O	ATP5PO	ATP synthase peripheral stalk subunit OSCP	21q22.11	-0.30019	7.27368	0.473173	0.967235
NM_015684	ATP5S	ATP5S	ATP synthase, H+ transporting, mitochondrial Fo complex subunit s (factor B)	14q21.3	0.10268	2.99439	0.814697	1
NM_001167867	ATP5SL	DMAC2	distal membrane arm assembly complex 2	19q13.2	0.231177	5.79388	0.581968	1
NM_001183	ATP6AP1	ATP6AP1	ATPase H+ transporting accessory protein 1	Xq28	-0.685921	7.04478	0.102473	0.501163
NM_001017971	ATP6AP1L	ATP6AP1L	ATPase H+ transporting accessory protein 1 like	5q14.2	0.322911	0.168579	0.518956	0.971751
NM_005765	ATP6AP2	ATP6AP2	ATPase H+ transporting accessory protein 2	Xp11.4	-0.285171	7.03668	0.495669	0.967235
NM_005177	ATP6V0A1	ATP6V0A1	ATPase H+ transporting V0 subunit a1	17q21.2	-1.03511	5.78108	0.0145328	0.132635
NM_012463	ATP6V0A2	ATP6V0A2	ATPase H+ transporting V0 subunit a2	12q24.31	0.0404912	4.88127	0.924839	1
NM_001128839	CACNA1D	CACNA1D	calcium voltage-gated channel subunit alpha1 D	3p21.1	-5.70544	-0.37109	8.34515e-11	6.87145e-09
NM_001039457	ATP6V0B	ATP6V0B	ATPase H+ transporting V0 subunit b	1p34.1	-0.888301	6.4655	0.0351784	0.254821
NM_001198569	ATP6V0C	ATP6V0C	ATPase H+ transporting V0 subunit c	16p13.3	-0.882203	7.5596	0.03615	0.258836
NM_004691	ATP6V0D1	ATP6V0D1	ATPase H+ transporting V0 subunit d1	16q22.1	-0.609678	6.88879	0.146387	0.608556
NM_080283	ABCA9	ABCA9	ATP binding cassette subfamily A member 9	17q24.2	-5.69206	-1.79656	5.10099e-05	0.00120005
NM_003945	ATP6V0E1	ATP6V0E1	ATPase H+ transporting V0 subunit e1	5q35.1	-1.1733	7.34369	0.00560057	0.0633947
NM_001100592	ATP6V0E2	ATP6V0E2	ATPase H+ transporting V0 subunit e2	7q36.1	-0.883059	5.15048	0.0370357	0.263858
NM_001690	ATP6V1A	ATP6V1A	ATPase H+ transporting V1 subunit A	3q13.31	-0.913714	6.98033	0.0301951	0.227952
NM_001692	ATP6V1B1	ATP6V1B1	ATPase H+ transporting V1 subunit B1	2p13.3	0.0543571	0.694834	0.93929	1
NM_001693	ATP6V1B2	ATP6V1B2	ATPase H+ transporting V1 subunit B2	8p21.3	-0.506573	7.24618	0.2268	0.758412
NM_001695	ATP6V1C1	ATP6V1C1	ATPase H+ transporting V1 subunit C1	8q22.3	-0.740511	6.23531	0.0785958	0.424986
NM_001039362	ATP6V1C2	ATP6V1C2	ATPase H+ transporting V1 subunit C2	2p25.1	-1.1815	-2.27172	0.389951	0.9165
NM_015994	ATP6V1D	ATP6V1D	ATPase H+ transporting V1 subunit D	14q23.3	-0.42471	6.39216	0.311277	0.852975
NM_001039367	ATP6V1E1	ATP6V1E1	ATPase H+ transporting V1 subunit E1	22q11.21	-1.00893	7.1238	0.0168648	0.148879
NM_080653	ATP6V1E2	ATP6V1E2	ATPase H+ transporting V1 subunit E2	2p21	0.411995	0.991671	0.396133	0.91818
NM_153225	C8orf84	SBSPON	somatomedin B and thrombospondin type 1 domain containing	8q21.11	-5.69099	-1.79682	5.10099e-05	0.00120005
NM_004888	ATP6V1G1	ATP6V1G1	ATPase H+ transporting V1 subunit G1	9q32	-1.02968	6.45748	0.0148793	0.134967
NM_001204078	ATP6V1G2	ATP6V1G2	ATPase H+ transporting V1 subunit G2	6p21.33	-0.197133	-0.649243	0.78614	1
NR_037853_1	ATP6V1G2-DDX39B	ATP6V1G2-DDX39B	ATP6V1G2-DDX39B readthrough (NMD candidate)	6p21.33	0.289511	8.31253	0.488592	0.967235
NM_213620	ATP6V1H	ATP6V1H	ATPase H+ transporting V1 subunit H	8q11.23	-0.744675	6.27123	0.0769052	0.419394
NM_000052	ATP7A	ATP7A	ATPase copper transporting alpha	Xq21.1	0.255473	3.30955	0.552749	0.989888
NM_000053	ATP7B	ATP7B	ATPase copper transporting beta	13q14.3	-0.722725	3.06455	0.0948423	0.474824
NM_006329	FBLN5	FBLN5	fibulin 5	14q32.12	-5.67594	1.86226	5.50926e-20	1.53018e-17
NM_002518	NPAS2	NPAS2	neuronal PAS domain protein 2	2q11.2	-5.67567	4.578	1.25297e-26	7.77218e-24
NM_005603	ATP8B1	ATP8B1	ATPase phospholipid transporting 8B1	18q21.31	0.459124	6.30728	0.274034	0.805607
NM_001005855	ATP8B2	ATP8B2	ATPase phospholipid transporting 8B2	1q21.3	-0.0692663	5.23849	0.870615	1
NM_138813	ATP8B3	ATP8B3	ATPase phospholipid transporting 8B3	19p13.3	0.177709	4.34505	0.67505	1
NM_024837	ATP8B4	ATP8B4	ATPase phospholipid transporting 8B4 (putative)	15q21.2	-4.14059	-2.55092	0.0413159	0.282353
NR_003582	ATP8B5P	ATP8B5P	ATPase phospholipid transporting 8B5, pseudogene	9p13.3	0.145932	2.70748	0.737827	1
NM_006045	ATP9A	ATP9A	ATPase phospholipid transporting 9A (putative)	20q13.2	-0.68283	5.62794	0.105247	0.50964
NM_198531	ATP9B	ATP9B	ATPase phospholipid transporting 9B (putative)	18q23	-0.208567	4.30562	0.623267	1
NM_001042546	ATPAF1	ATPAF1	ATP synthase mitochondrial F1 complex assembly factor 1	1p33	-0.163083	5.12629	0.699024	1
NM_001145474	ATPAF1-AS1	TEX38	testis expressed 38	1p33	-0.0539586	-2.73142	1	1
NM_145691	ATPAF2	ATPAF2	ATP synthase mitochondrial F1 complex assembly factor 2	17p11.2	-0.224456	3.39793	0.601788	1
NM_080650	ATPBD4	DPH6	diphthamine biosynthesis 6	15q14	0.242506	2.91569	0.578276	1
NM_178191	ATPIF1	ATP5IF1	ATP synthase inhibitory factor subunit 1	1p35.3	-0.393939	6.28718	0.347615	0.881547
NM_001184	ATR	ATR	ATR serine/threonine kinase	3q23	-0.0761544	5.41971	0.857027	1
NM_130384	ATRIP	ATRIP	ATR interacting protein	3p21.31	0.118533	4.22177	0.782136	1
NM_001207047	ATRN	ATRN	attractin	20p13	0.0979493	6.25088	0.815498	1
NM_207303	ATRNL1	ATRNL1	attractin like 1	10q25.3	-0.296922	2.87647	0.494172	0.967235
NM_000489	ATRX	ATRX	ATRX, chromatin remodeler	Xq21.1	0.745628	6.32882	0.0765282	0.418119
NM_000332	ATXN1	ATXN1	ataxin 1	6p22.3	1.01798	5.61021	0.0162265	0.14427
NM_001167621	ATXN10	ATXN10	ataxin 10	22q13.31	0.371608	7.62075	0.374555	0.905879
NM_001137675	ATXN1L	ATXN1L	ataxin 1 like	16q22.2	0.549203	6.1903	0.191018	0.701114
NM_002973	ATXN2	ATXN2	ataxin 2	12q24.12	-0.268769	5.73339	0.52244	0.975135
NM_148416	ATXN2L	ATXN2L	ataxin 2 like	16p11.2	0.0206684	8.16205	0.960705	1
NR_028463	ATXN3	ATXN3	ataxin 3	14q32.12	0.261366	4.34514	0.538076	0.984956
NM_000333	ATXN7	ATXN7	ataxin 7	3p14.1	0.217525	5.43552	0.605233	1
NM_020725	ATXN7L1	ATXN7L1	ataxin 7 like 1	7q22.3	-0.513788	2.74881	0.236514	0.775678
NM_153340	ATXN7L2	ATXN7L2	ataxin 7 like 2	1p13.3	-0.0162387	3.1694	0.977131	1
NM_001098833	ATXN7L3	ATXN7L3	ataxin 7 like 3	17q21.31	0.463817	6.32914	0.269002	0.79959
NM_001136262	ATXN7L3B	ATXN7L3B	ataxin 7 like 3B	12q21.1	0.390842	6.15949	0.35147	0.885157
NR_002717	ATXN8OS	ATXN8OS	ATXN8 opposite strand (non-protein coding)	13q21.33	0.272376	-2.74772	1	1
NM_001698	AUH	AUH	AU RNA binding methylglutaconyl-CoA hydratase	9q22.31	-0.340716	3.47002	0.42588	0.939411
NM_181575	AUP1	AUP1	AUP1, lipid droplet regulating VLDL assembly factor	2p13.1	0.0757266	6.75737	0.85681	1
NM_198433	AURKA	AURKA	aurora kinase A	20q13.2	-0.440719	6.40924	0.293596	0.829757
NM_017900	AURKAIP1	AURKAIP1	aurora kinase A interacting protein 1	1p36.33	-0.363834	6.49163	0.385476	0.914497
NR_001587	AURKAPS1	AURKAPS1	aurora kinase A pseudogene 1	1q41	-0.618028	2.13097	0.162876	0.643788
NM_004217	AURKB	AURKB	aurora kinase B	17p13.1	-0.636706	6.7408	0.129555	0.578429
NM_001015879	AURKC	AURKC	aurora kinase C	19q13.43	-0.542246	-0.939834	0.44642	0.952469
NM_020371	AVEN	AVEN	apoptosis and caspase activation inhibitor	15q14	0.541936	4.1627	0.202113	0.71997
NM_006576	AVIL	AVIL	advillin	12q14.1	0.380335	1.47915	0.414641	0.929421
NM_015060	AVL9	AVL9	AVL9 cell migration associated	7p14.3	-0.0354646	4.39274	0.935545	1
NM_134268	CYGB	CYGB	cytoglobin	17q25.1	-5.66048	-0.419323	1.31163e-10	1.03424e-08
NM_001093726	SEPP1	SELENOP	selenoprotein P	5p12	-5.65995	2.18217	5.28026e-21	1.72386e-18
NM_144696	AXDND1	AXDND1	axonemal dynein light chain domain containing 1	1q25.2	-2.24103	-2.49235	0.15157	0.618163
NM_003502	AXIN1	AXIN1	axin 1	16p13.3	-0.239239	5.99883	0.568718	1
NM_004655	AXIN2	AXIN2	axin 2	17q24.1	-0.176554	2.5735	0.689882	1
NM_021913	AXL	AXL	AXL receptor tyrosine kinase	19q13.2	0.587767	9.43929	0.160559	0.638924
NM_014984	AZI1	CEP131	centrosomal protein 131	17q25.3	-0.412949	5.10351	0.327284	0.86299
NM_022461	AZI2	AZI2	5-azacytidine induced 2	3p24.1	0.194639	5.14472	0.644432	1
NM_148174	AZIN1	AZIN1	antizyme inhibitor 1	8q22.3	0.505442	7.4019	0.227698	0.759546
NM_001700	AZU1	AZU1	azurocidin 1	19p13.3	-1.88266	-3.03879	1	1
NM_004048	B2M	B2M	beta-2-microglobulin	15q21.1	-0.3565	10.6503	0.393618	0.91818
NM_003781	B3GALNT1	B3GALNT1	beta-1,3-N-acetylgalactosaminyltransferase 1 (globoside blood group)	3q26.1	-0.297773	4.31671	0.482649	0.967235
NM_152490	B3GALNT2	B3GALNT2	beta-1,3-N-acetylgalactosaminyltransferase 2	1q42.3	0.29492	5.13604	0.484028	0.967235
NM_020981	B3GALT1	B3GALT1	beta-1,3-galactosyltransferase 1	2q24.3	-0.17919	-1.7886	1	1
NM_003782	B3GALT4	B3GALT4	beta-1,3-galactosyltransferase 4	6p21.32	-1.88266	-3.03879	1	1
NM_033170	B3GALT5	B3GALT5	beta-1,3-galactosyltransferase 5	21q22.2	0.226756	3.96338	0.594031	1
NM_080605	B3GALT6	B3GALT6	beta-1,3-galactosyltransferase 6	1p36.33	0.44544	5.34962	0.289981	0.8251
NM_194318	B3GALTL	B3GLCT	beta 3-glucosyltransferase	13q12.3	-0.197709	4.25565	0.642364	1
NM_080742	B3GAT2	B3GAT2	beta-1,3-glucuronyltransferase 2	6q13	1.85535	-3.03501	1	1
NM_012200	B3GAT3	B3GAT3	beta-1,3-glucuronyltransferase 3	11q12.3	-0.819347	6.03082	0.0520075	0.331895
NM_006876	B3GNT1	B4GAT1	beta-1,4-glucuronyltransferase 1	11q13.2	-0.391185	4.36697	0.356182	0.890047
NM_006577	B3GNT2	B3GNT2	UDP-GlcNAc:betaGal beta-1,3-N-acetylglucosaminyltransferase 2	2p15	-0.544811	4.78063	0.197386	0.709883
NM_001100159	C7orf57	C7orf57	chromosome 7 open reading frame 57	7p12.3	-5.65545	2.32027	1.84376e-21	6.23827e-19
NM_030765	B3GNT4	B3GNT4	UDP-GlcNAc:betaGal beta-1,3-N-acetylglucosaminyltransferase 4	12q24.31	0.507904	1.9976	0.262138	0.794151
NM_001276	CHI3L1	CHI3L1	chitinase 3 like 1	1q32.1	-5.6176	-1.83138	0.000127331	0.00265938
NM_001164695	IYD	IYD	iodotyrosine deiodinase	6q25.1	-5.60875	-1.84708	8.02382e-05	0.00178393
NM_145236	B3GNT7	B3GNT7	UDP-GlcNAc:betaGal beta-1,3-N-acetylglucosaminyltransferase 7	2q37.1	1.35242	-0.292513	0.017586	0.153139
NM_198540	B3GNT8	B3GNT8	UDP-GlcNAc:betaGal beta-1,3-N-acetylglucosaminyltransferase 8	19q13.2	1.38067	-2.4135	0.327071	0.862969
NM_033309	B3GNT9	B3GNT9	UDP-GlcNAc:betaGal beta-1,3-N-acetylglucosaminyltransferase 9	16q22.1	-0.154817	1.62156	0.743514	1
NM_001009905	B3GNTL1	B3GNTL1	UDP-GlcNAc:betaGal beta-1,3-N-acetylglucosaminyltransferase like 1	17q25.3	0.194483	3.27711	0.654996	1
NM_001478	B4GALNT1	B4GALNT1	beta-1,4-N-acetyl-galactosaminyltransferase 1	12q13.3	-0.981328	2.65201	0.0257427	0.203283
NM_001159388	B4GALNT2	B4GALNT2	beta-1,4-N-acetyl-galactosaminyltransferase 2	17q21.32	4.61748	-2.34533	0.00737888	0.0789612
NM_173593	B4GALNT3	B4GALNT3	beta-1,4-N-acetyl-galactosaminyltransferase 3	12p13.33	0.919829	2.60422	0.0360575	0.258373
NM_033326	SOX6	SOX6	SRY-box 6	11p15.3	-5.60875	-1.84708	8.02382e-05	0.00178393
NM_001497	B4GALT1	B4GALT1	beta-1,4-galactosyltransferase 1	9p21.1	0.238728	7.75982	0.568124	1
NM_003780	B4GALT2	B4GALT2	beta-1,4-galactosyltransferase 2	1p34.1	0.248477	6.41692	0.553333	0.990097
NM_001199873	B4GALT3	B4GALT3	beta-1,4-galactosyltransferase 3	1q23.3	0.0912207	5.34496	0.828928	1
NM_212543	B4GALT4	B4GALT4	beta-1,4-galactosyltransferase 4	3q13.32	-0.838359	4.96522	0.0477708	0.312277
NM_004776	B4GALT5	B4GALT5	beta-1,4-galactosyltransferase 5	20q13.13	0.151112	7.17781	0.717944	1
NM_004775	B4GALT6	B4GALT6	beta-1,4-galactosyltransferase 6	18q12.1	-0.290921	4.57247	0.491774	0.967235
NM_007255	B4GALT7	B4GALT7	beta-1,4-galactosyltransferase 7	5q35.3	0.118068	4.80616	0.780662	1
NM_001202439	B7H6	NCR3LG1	natural killer cell cytotoxicity receptor 3 ligand 1	11p15.1	-1.05801	4.15593	0.0133976	0.125159
NM_001243475	B9D1	B9D1	B9 domain containing 1	17p11.2	-0.702865	3.92402	0.0990557	0.48804
NM_030578	B9D2	B9D2	B9 domain containing 2	19q13.2	0.219225	2.55879	0.615814	1
NM_001701	BAAT	BAAT	bile acid-CoA:amino acid N-acyltransferase	9q31.1	-1.18648	-1.74811	0.185438	0.690556
NM_014173	BABAM1	BABAM1	BRISC and BRCA1 A complex member 1	19p13.11	-0.256665	6.71167	0.540043	0.986327
NM_001207048	BACE1	BACE1	beta-secretase 1	11q23.3	0.401901	5.78877	0.338779	0.874509
NR_037803	BACE1-AS	BACE1-AS	BACE1 antisense RNA	11q23.3	0.0444018	0.734936	0.970444	1
NM_138991	BACE2	BACE2	beta-site APP-cleaving enzyme 2	21q22.2-q22.3	-1.06186	6.68666	0.0120467	0.115734
NM_001186	BACH1	BACH1	BTB domain and CNC homolog 1	21q21.3	-0.164676	5.01303	0.696717	1
NM_002421	MMP1	MMP1	matrix metallopeptidase 1	11q22.2	-5.60032	3.70775	6.20453e-25	3.39588e-22
NM_004322	BAD	BAD	BCL2 associated agonist of cell death	11q13.1	-0.119985	5.26601	0.77631	1
NM_001172415	BAG1	BAG1	BCL2 associated athanogene 1	9p13.3	-0.165746	5.58602	0.693754	1
NM_004282	BAG2	BAG2	BCL2 associated athanogene 2	6p12.1	0.193273	5.24421	0.646168	1
NM_004281	BAG3	BAG3	BCL2 associated athanogene 3	10q26.11	-0.174678	6.58401	0.676762	1
NM_001204878	BAG4	BAG4	BCL2 associated athanogene 4	8p11.23	0.131554	4.27813	0.757861	1
NM_001015048	BAG5	BAG5	BCL2 associated athanogene 5	14q32.33	0.630843	5.9394	0.13372	0.589618
NM_080702	BAG6	BAG6	BCL2 associated athanogene 6	6p21.33	0.0838012	8.15323	0.841081	1
NM_001187	BAGE	BAGE	B melanoma antigen	21p11.1 not on reference assembly	1.1604	-1.85098	0.208521	0.73173
NM_182482	BAGE2	BAGE2	BAGE family member 2	21p11.2	1.30206	-0.404361	0.0201029	0.169427
NM_182481	BAGE3	BAGE3	BAGE family member 3	21p11.2 not on reference assembly	1.30206	-0.404361	0.0201029	0.169427
NM_181704	BAGE4	BAGE4	BAGE family member 4	21p11.1 not on reference assembly	1.32794	-0.410794	0.0201029	0.169427
NM_182484	BAGE5	BAGE5	BAGE family member 5	13cen, GRCh38 novel patch	1.32794	-0.410794	0.0201029	0.169427
NM_001080519	BAHCC1	BAHCC1	BAH domain and coiled-coil containing 1	17q25.3	0.0710831	4.99847	0.867628	1
NM_014952	BAHD1	BAHD1	bromo adjacent homology domain containing 1	15q15.1	0.294968	5.42462	0.48299	0.967235
NM_001702	BAI1	ADGRB1	adhesion G protein-coupled receptor B1	8q24.3	0.742618	-2.82645	1	1
NM_001703	BAI2	ADGRB2	adhesion G protein-coupled receptor B2	1p35.2	-1.07377	2.13416	0.0167722	0.148272
NM_001704	BAI3	ADGRB3	adhesion G protein-coupled receptor B3	6q12-q13	2.46909	-1.64521	0.00506268	0.0585691
NM_017451	BAIAP2	BAIAP2	BAI1 associated protein 2	17q25.3	-1.08823	5.90716	0.0102461	0.101853
NM_018842	BAIAP2L1	BAIAP2L1	BAI1 associated protein 2 like 1	7q21.3-q22.1	0.197912	6.00874	0.637592	1
NM_025045	BAIAP2L2	BAIAP2L2	BAI1 associated protein 2 like 2	22q13.1	-0.973451	5.92606	0.0213417	0.177615
NM_001199099	BAIAP3	BAIAP3	BAI1 associated protein 3	16p13.3	-1.19099	4.18883	0.00551849	0.0626945
NM_001188	BAK1	BAK1	BCL2 antagonist/killer 1	6p21.31	-0.279491	4.48815	0.509704	0.967235
NM_001097642	GJB1	GJB1	gap junction protein beta 1	Xq13.1	-5.52494	-1.89735	0.000127331	0.00265938
NM_001143985	BANF1	BANF1	barrier to autointegration factor 1	11q13.1	-0.079299	7.38044	0.849805	1
NM_001127507	BANK1	BANK1	B cell scaffold protein with ankyrin repeats 1	4q24	-1.17951	-0.743732	0.0635159	0.376484
NM_001173539	BANP	BANP	BTG3 associated nuclear protein	16q24.2	0.111873	3.42501	0.795554	1
NM_004656	BAP1	BAP1	BRCA1 associated protein 1	3p21.1	-0.0360747	6.78238	0.931726	1
NM_000465	BARD1	BARD1	BRCA1 associated RING domain 1	2q35	0.532883	3.82511	0.211487	0.736986
NM_006317	BASP1	BASP1	brain abundant membrane attached signal protein 1	5p15.1	0.579983	6.9674	0.166833	0.651954
NR_033774	BASP1P1	BASP1P1	brain abundant, membrane attached signal protein 1 pseudogene 1	13q12.12	1.20776	-3.09129	1	1
NM_177980	CDH26	CDH26	cadherin 26	20q13.33	-5.52245	-1.8989	0.000127331	0.00265938
NM_018664	BATF3	BATF3	basic leucine zipper ATF-like transcription factor 3	1q32.3	0.376566	2.5674	0.391335	0.91798
NM_004324	BAX	BAX	BCL2 associated X, apoptosis regulator	19q13.33	-0.243469	6.3837	0.56138	0.995495
NM_013448	BAZ1A	BAZ1A	bromodomain adjacent to zinc finger domain 1A	14q13.1-q13.2	0.615523	6.06786	0.143189	0.602036
NM_032408	BAZ1B	BAZ1B	bromodomain adjacent to zinc finger domain 1B	7q11.23	0.118121	7.39247	0.777754	1
NM_013449	BAZ2A	BAZ2A	bromodomain adjacent to zinc finger domain 2A	12q13.3	0.388301	7.27968	0.353625	0.888072
NM_013450	BAZ2B	BAZ2B	bromodomain adjacent to zinc finger domain 2B	2q24.2	0.227426	4.72868	0.590544	1
NM_001127242	BBC3	BBC3	BCL2 binding component 3	19q13.32	0.903204	3.32011	0.0365099	0.260911
NM_001195306	BBIP1	BBIP1	BBSome interacting protein 1	10q25.2	-0.090208	4.31916	0.832813	1
NM_003986	BBOX1	BBOX1	gamma-butyrobetaine hydroxylase 1	11p14.2	-0.83822	-2.82373	1	1
NM_024649	BBS1	BBS1	Bardet-Biedl syndrome 1	11q13.2	0.0938951	4.68632	0.82569	1
NM_024685	BBS10	BBS10	Bardet-Biedl syndrome 10	12q21.2	0.325486	4.26426	0.443831	0.950978
NM_001178007	BBS12	BBS12	Bardet-Biedl syndrome 12	4q27	-0.756512	2.68978	0.0843315	0.446338
NM_031885	BBS2	BBS2	Bardet-Biedl syndrome 2	16q13	-0.50824	5.15426	0.227914	0.759799
NR_045565	BBS4	BBS4	Bardet-Biedl syndrome 4	15q24.1	-0.438458	3.96493	0.304294	0.845471
NM_152384	BBS5	BBS5	Bardet-Biedl syndrome 5	2q31.1	-0.161073	2.02837	0.719726	1
NM_176824	BBS7	BBS7	Bardet-Biedl syndrome 7	4q27	0.165821	4.75885	0.695699	1
NM_014451	BBS9	BBS9	Bardet-Biedl syndrome 9	7p14.3	-0.0196202	3.20584	0.966535	1
NM_020235	BBX	BBX	BBX, HMG-box containing	3q13.12	0.554818	6.24129	0.186615	0.692954
NM_001098514	C16orf89	C16orf89	chromosome 16 open reading frame 89	16p13.3	-5.51198	-1.9042	0.000127331	0.00265938
NM_198427	BCAN	BCAN	brevican	1q23.1	-1.90344	-3.0303	1	1
NM_018844	BCAP29	BCAP29	B cell receptor associated protein 29	7q22.3	-0.132206	6.22341	0.752835	1
NR_024450	BCAP31	BCAP31	B cell receptor associated protein 31	Xq28	-0.444807	7.62822	0.288057	0.822048
NM_001170718	BCAR1	BCAR1	BCAR1, Cas family scaffolding protein	16q23.1	-0.376639	7.73129	0.368108	0.900621
NM_003567	BCAR3	BCAR3	BCAR3, NSP family adaptor protein	1p22.1	-0.318981	7.2135	0.446075	0.952469
NM_003657	BCAS1	BCAS1	breast carcinoma amplified sequence 1	20q13.2	0.250639	-2.34346	1	1
NM_005872	BCAS2	BCAS2	BCAS2, pre-mRNA processing factor	1p13.2	-0.212183	5.01788	0.615186	1
NM_017679	BCAS3	BCAS3	BCAS3, microtubule associated cell migration factor	17q23.2	0.140611	3.28353	0.750167	1
NM_198799	BCAS4	BCAS4	breast carcinoma amplified sequence 4	20q13.13	-0.874792	3.40178	0.042529	0.287372
NM_001178091	BCAT1	BCAT1	branched chain amino acid transaminase 1	12p12.1	-0.660214	3.1386	0.127017	0.571486
NR_028451	BCAT2	BCAT2	branched chain amino acid transaminase 2	19q13.33	-0.0646104	5.98006	0.878063	1
NM_016567	BCCIP	BCCIP	BRCA2 and CDKN1A interacting protein	10q26.2	0.0157082	5.95893	0.971025	1
NM_181708	BCDIN3D	BCDIN3D	BCDIN3 domain containing RNA methyltransferase	12q13.12	0.187651	2.13315	0.684288	1
NM_001030060	SAMD5	SAMD5	sterile alpha motif domain containing 5	6q24.3	-5.5081	2.18887	1.64212e-20	4.70127e-18
NM_001164783	BCKDHA	BCKDHA	branched chain keto acid dehydrogenase E1, alpha polypeptide	19q13.2	0.419362	5.0446	0.320154	0.862494
NM_000056	BCKDHB	BCKDHB	branched chain keto acid dehydrogenase E1 subunit beta	6q14.1	-0.708241	4.8049	0.0942664	0.472947
NM_005881	BCKDK	BCKDK	branched chain ketoacid dehydrogenase kinase	16p11.2	-0.0658972	6.70512	0.875234	1
NM_003921	BCL10	BCL10	B cell CLL/lymphoma 10	1p22.3	0.484235	6.30476	0.248521	0.787189
NM_138576	BCL11B	BCL11B	B cell CLL/lymphoma 11B	14q32.2	2.67265	-2.06285	0.0276024	0.213844
NM_001370	DNAH6	DNAH6	dynein axonemal heavy chain 6	2p11.2	-5.49929	-1.91099	0.000203925	0.00399879
NR_026861	LINC00473	LINC00473	long intergenic non-protein coding RNA 473	6q27	-5.45286	-0.5844	1.44071e-09	9.38303e-08
NM_138578	BCL2L1	BCL2L1	BCL2 like 1	20q11.21	0.324524	8.14487	0.437715	0.948111
NM_020396	BCL2L10	BCL2L10	BCL2 like 10	15q21.2	-0.042827	-2.92571	1	1
NM_006538	BCL2L11	BCL2L11	BCL2 like 11	2q13	0.535819	3.70237	0.208022	0.730878
NM_001040668	BCL2L12	BCL2L12	BCL2 like 12	19q13.33	-0.379411	5.02856	0.368268	0.900658
NM_015367	BCL2L13	BCL2L13	BCL2 like 13	22q11.21	-0.122603	6.23167	0.770256	1
NM_138723	BCL2L14	BCL2L14	BCL2 like 14	12p13.2	-1.90344	-3.0303	1	1
NM_001010922	BCL2L15	BCL2L15	BCL2 like 15	1p13.2	-0.260249	0.794066	0.593646	1
NM_004050	BCL2L2	BCL2L2	BCL2 like 2	14q11.2	0.36558	5.69226	0.384257	0.913545
NM_001199864	BCL2L2-PABPN1	BCL2L2-PABPN1	BCL2L2-PABPN1 readthrough	14q11.2	0.35702	7.66737	0.393517	0.91818
NM_005178	BCL3	BCL3	B cell CLL/lymphoma 3	19q13.32	0.387558	5.57046	0.356875	0.890359
NM_001130845	BCL6	BCL6	B cell CLL/lymphoma 6	3q27.3	-0.549003	4.36084	0.195353	0.707523
NM_020993	BCL7A	BCL7A	BCL tumor suppressor 7A	12q24.31	-0.383067	5.11828	0.363482	0.898054
NM_001707	BCL7B	BCL7B	BCL tumor suppressor 7B	7q11.23	0.00999395	6.03959	0.98183	1
NM_004765	BCL7C	BCL7C	BCL tumor suppressor 7C	16p11.2	-0.0783094	5.12945	0.853712	1
NM_004326	BCL9	BCL9	B cell CLL/lymphoma 9	1q21.2	-0.284695	5.61328	0.498466	0.967235
NM_182557	BCL9L	BCL9L	B cell CLL/lymphoma 9 like	11q23.3	0.143374	7.70332	0.731718	1
NM_014739	BCLAF1	BCLAF1	BCL2 associated transcription factor 1	6q23.3	0.331007	7.36867	0.428892	0.942153
NM_017429	BCMO1	BCO1	beta-carotene oxygenase 1	16q23.2	-1.21326	1.56367	0.00874104	0.0894727
NM_001256398	BCO2	BCO2	beta-carotene oxygenase 2	11q23.1	-1.36297	-0.646666	0.0233168	0.187504
NM_001123385	BCOR	BCOR	BCL6 corepressor	Xp11.4	0.395803	6.16785	0.345771	0.879985
NM_021946	BCORL1	BCORL1	BCL6 corepressor like 1	Xq26.1	0.488072	3.4496	0.257859	0.794151
NR_033732	BCORP1	BCORP1	BCL6 corepressor pseudogene 1	Yq11.222	1.13751	-2.49008	0.484513	0.967235
NM_021574	BCR	BCR	BCR, RhoGEF and GTPase activating protein	22q11.23	0.41315	6.50565	0.324474	0.862969
NR_037566	BCRP2	BCRP2	breakpoint cluster region pseudogene 2	22q11.21	0.060281	2.30399	0.897083	1
NM_003667	LGR5	LGR5	leucine rich repeat containing G protein-coupled receptor 5	12q21.1	-5.44984	-1.94238	0.000203925	0.00399879
NM_001079866	BCS1L	BCS1L	BCS1 homolog, ubiquinol-cytochrome c reductase complex chaperone	2q35	-0.164199	4.80631	0.698065	1
NR_001568	BCYRN1	BCYRN1	brain cytoplasmic RNA 1	2p21	-0.544626	-3.05982	1	1
NR_036529	BDAG1	CCDC180	coiled-coil domain containing 180	9q22.33	-0.229668	3.05563	0.597922	1
NM_203314	BDH1	BDH1	3-hydroxybutyrate dehydrogenase 1	3q29	-1.21819	4.81965	0.00435586	0.0524017
NM_020139	BDH2	BDH2	3-hydroxybutyrate dehydrogenase 2	4q24	-0.165069	5.04502	0.695956	1
NM_000710	BDKRB1	BDKRB1	bradykinin receptor B1	14q32.2	2.13666	-1.38319	0.0075161	0.0800155
NR_026773	C6orf123	LINC01558	long intergenic non-protein coding RNA 1558	6q27	-5.43241	-1.95122	0.000203925	0.00399879
NM_207361	FREM2	FREM2	FRAS1 related extracellular matrix protein 2	13q13.3	-5.42804	0.550314	2.77469e-14	3.46539e-12
NR_033314	BDNF-AS1	BDNF-AS	BDNF antisense RNA	11p14.1	-0.34036	-0.631009	0.591959	1
NM_018429	BDP1	BDP1	B double prime 1, subunit of RNA polymerase III transcription initiation factor IIIB	5q13.2	0.470583	5.60624	0.262826	0.794151
NM_198508	KLRG2	KLRG2	killer cell lectin like receptor G2	7q34	-5.42366	-0.621074	1.85576e-09	1.18673e-07
NM_003766	BECN1	BECN1	beclin 1	17q21.31	-0.149272	6.09764	0.722126	1
NM_001159531	BEGAIN	BEGAIN	brain enriched guanylate kinase associated	14q32.2	-0.425436	-1.91489	0.678913	1
NM_153346	BEND2	BEND2	BEN domain containing 2	Xp22.13	-1.24242	-3.08901	1	1
NM_001080450	BEND3	BEND3	BEN domain containing 3	6q21	0.216102	3.14868	0.620512	1
NM_001163278	ODZ1	TENM1	teneurin transmembrane protein 1	Xq25	-5.37564	0.501982	5.41227e-14	6.49786e-12
NM_152731	BEND6	BEND6	BEN domain containing 6	6p12.1	1.23767	2.07558	0.00497624	0.0578768
NM_152751	BEND7	BEND7	BEN domain containing 7	10p13	-0.112999	3.90344	0.791489	1
NM_001139443	BEST1	BEST1	bestrophin 1	11q12.3	-0.822892	-2.82996	1	1
NM_017682	BEST2	BEST2	bestrophin 2	19p13.13	-0.0268731	-2.93204	1	1
NM_152439	BEST3	BEST3	bestrophin 3	12q15	-0.854708	1.09244	0.0701068	0.400435
NM_153274	BEST4	BEST4	bestrophin 4	1p34.1	-0.54895	-1.28984	0.494623	0.967235
NM_005868	BET1	BET1	Bet1 golgi vesicular membrane trafficking protein	7q21.3	-0.252796	5.34754	0.548063	0.987448
NM_001098787	BET1L	BET1L	Bet1 golgi vesicular membrane trafficking protein like	11p15.5	-0.116196	6.02892	0.782028	1
NM_018476	BEX1	BEX1	brain expressed X-linked 1	Xq22.1	0.0958185	-0.725471	0.923787	1
NM_080389	DEFB104A	DEFB104A	defensin beta 104A	8p23.1	-5.37542	-1.98584	0.000329726	0.00609928
NM_001127688	BEX4	BEX4	brain expressed X-linked 4	Xq22.1	-0.0450356	5.63116	0.91434	1
NM_001012978	BEX5	BEX5	brain expressed X-linked 5	Xq22.1	1.43229	0.287531	0.00510719	0.0589211
NM_016561	BFAR	BFAR	bifunctional apoptosis regulator	16p13.12	-0.0199706	6.27357	0.962741	1
NM_001161705	BFSP1	BFSP1	beaded filament structural protein 1	20p12.1	-0.719236	2.13834	0.107159	0.515744
NM_199173	BGLAP	BGLAP	bone gamma-carboxyglutamate protein	1q22	0.895933	1.33204	0.0540159	0.339703
NM_001711	BGN	BGN	biglycan	Xq28	0.38722	-2.14187	0.798309	1
NM_177455	BHLHA15	BHLHA15	basic helix-loop-helix family member a15	7q21.3	-2.69477	-2.92327	0.51014	0.967235
NM_030639	BHLHB9	BHLHB9	basic helix-loop-helix family member b9	Xq22.1	-1.04698	2.30186	0.0177662	0.154275
NM_152414	BHLHE22	BHLHE22	basic helix-loop-helix family member e22	8q12.3	-1.23998	-3.09004	1	1
NM_003670	BHLHE40	BHLHE40	basic helix-loop-helix family member e40	3p26.1	0.363104	8.32906	0.385261	0.914497
NM_030762	BHLHE41	BHLHE41	basic helix-loop-helix family member e41	12p12.1	-0.183831	3.53995	0.672155	1
NM_001178005	BHMT2	BHMT2	betaine--homocysteine S-methyltransferase 2	5q14.1	-0.804124	-2.21004	0.5897	1
NM_001080512	BICC1	BICC1	BicC family RNA binding protein 1	10q21.1	0.347815	7.21048	0.406133	0.921388
NM_001003398	BICD1	BICD1	BICD cargo adaptor 1	12p11.21	0.999336	4.79084	0.0186132	0.159818
NM_015250	BICD2	BICD2	BICD cargo adaptor 2	9q22.31	-0.128909	6.45717	0.758591	1
NM_001244567	BID	BID	BH3 interacting domain death agonist	22q11.21	0.867709	4.03302	0.0421162	0.2851
NM_001197	BIK	BIK	BCL2 interacting killer	22q13.2	1.2825	-0.247202	0.0202902	0.170409
NM_139347	BIN1	BIN1	bridging integrator 1	2q14.3	0.369544	6.69942	0.377859	0.906715
NM_018688	BIN3	BIN3	bridging integrator 3	8p21.3	-0.026842	5.14952	0.950626	1
NM_001166	BIRC2	BIRC2	baculoviral IAP repeat containing 2	11q22.2	0.349473	6.4714	0.404514	0.921032
NM_182962	BIRC3	BIRC3	baculoviral IAP repeat containing 3	11q22.2	1.1686	6.0297	0.00591079	0.0663813
NM_001168	BIRC5	BIRC5	baculoviral IAP repeat containing 5	17q25.3	0.375289	6.91344	0.370061	0.902547
NM_016252	BIRC6	BIRC6	baculoviral IAP repeat containing 6	2p22.3	0.304545	6.59662	0.467343	0.967235
NM_139317	BIRC7	BIRC7	baculoviral IAP repeat containing 7	20q13.33	0.0484495	-1.31416	1	1
NM_001159596	BIVM	BIVM	basic, immunoglobulin-like variable motif containing	13q33.1	-0.380999	6.19099	0.3638	0.898588
NM_001204425	BIVM-ERCC5	BIVM-ERCC5	BIVM-ERCC5 readthrough	13q33.1	-0.213617	6.3579	0.610391	1
NR_024355	BK250D10.8	LINC00634	long intergenic non-protein coding RNA 634	22q13.2	-0.0900646	-1.7185	1	1
NM_001167821	BLCAP	BLCAP	bladder cancer associated protein	20q11.23	-0.886969	5.41291	0.0360125	0.258373
NM_001001786	BLID	BLID	BH3-like motif containing, cell death inducer	11q24.1	1.85535	-3.03501	1	1
NM_001715	BLK	BLK	BLK proto-oncogene, Src family tyrosine kinase	8p23.1	0.742928	-2.82631	1	1
NM_000057	BLM	BLM	Bloom syndrome RecQ like helicase	15q26.1	0.240311	4.73356	0.569256	1
NM_000386	BLMH	BLMH	bleomycin hydrolase	17q11.2	0.283286	5.2726	0.500792	0.967235
NM_001040702	DEFB104B	DEFB104B	defensin beta 104B	8p23.1	-5.37542	-1.98584	0.000329726	0.00609928
NM_001487	BLOC1S1	BLOC1S1	biogenesis of lysosomal organelles complex 1 subunit 1	12q13.2	0.114773	5.57203	0.7853	1
NR_037658	BLOC1S1-RDH5	BLOC1S1-RDH5			0.147735	4.95742	0.726674	1
NR_046314	BLOC1S2	BLOC1S2	biogenesis of lysosomal organelles complex 1 subunit 2	10q24.31	-0.148998	4.87307	0.724583	1
NM_212550	BLOC1S3	BLOC1S3	biogenesis of lysosomal organelles complex 1 subunit 3	19q13.32	-1.06958	3.70691	0.0128632	0.121692
NM_000712	BLVRA	BLVRA	biliverdin reductase A	7p13	-0.39821	5.91676	0.342969	0.87718
NR_045604	VTCN1	VTCN1	V-set domain containing T cell activation inhibitor 1	1p13.1-p12	-5.3634	0.483912	6.19986e-14	7.39572e-12
NM_003666	BLZF1	BLZF1	basic leucine zipper nuclear factor 1	1q24.2	-0.63185	4.66495	0.135506	0.593975
NM_012244	SLC7A8	SLC7A8	solute carrier family 7 member 8	14q11.2	-5.3493	0.830609	3.1709e-15	4.53902e-13
NM_005180	BMI1	BMI1	BMI1 proto-oncogene, polycomb ring finger	10p12.2	0.076379	5.54209	0.856453	1
NR_033403	BMP1	BMP1	bone morphogenetic protein 1	8p21.3	0.922162	7.37244	0.0286231	0.218926
NM_014482	BMP10	BMP10	bone morphogenetic protein 10	2p13.3	-1.88266	-3.03879	1	1
NM_001200	BMP2	BMP2	bone morphogenetic protein 2	20p12.3	0.585765	3.23757	0.175875	0.671078
NM_017593	BMP2K	BMP2K	BMP2 inducible kinase	4q21.21	0.134638	4.78926	0.750663	1
NM_001201	BMP3	BMP3	bone morphogenetic protein 3	4q21.21	0.615809	-2.97927	1	1
NM_130850	BMP4	BMP4	bone morphogenetic protein 4	14q22.2	-0.748898	3.63487	0.0798988	0.429846
NM_001718	BMP6	BMP6	bone morphogenetic protein 6	6p24.3	-1.32731	-1.18577	0.0671945	0.388482
NM_001719	BMP7	BMP7	bone morphogenetic protein 7	20q13.31	1.85655	-3.0345	1	1
NM_181809	BMP8A	BMP8A	bone morphogenetic protein 8a	1p34.3	0.508095	-0.243978	0.396569	0.91818
NM_002535	OAS2	OAS2	2'-5'-oligoadenylate synthetase 2	12q24.13	-5.33948	4.2452	2.71e-24	1.36299e-21
NM_133468	BMPER	BMPER	BMP binding endothelial regulator	7p14.3	-1.99486	-2.57087	0.246697	0.784078
NM_004329	BMPR1A	BMPR1A	bone morphogenetic protein receptor type 1A	10q23.2	0.398733	4.99336	0.34456	0.878345
NM_001004330	PLEKHG7	PLEKHG7	pleckstrin homology and RhoGEF domain containing G7	12q22	-5.33712	-2.00534	0.000329726	0.00609928
NM_001204	BMPR2	BMPR2	bone morphogenetic protein receptor type 2	2q33.1-q33.2	0.653823	6.46114	0.11972	0.551577
NM_014753	BMS1	BMS1	BMS1, ribosome biogenesis factor	10q11.21	0.122115	6.26	0.771048	1
NR_026566	BMS1P1	BMS1P1	BMS1, ribosome biogenesis factor pseudogene 1	10q11.22	-0.56995	3.97581	0.181835	0.682487
NR_026592	BMS1P4	BMS1P4	BMS1, ribosome biogenesis factor pseudogene 4	10q22.2	-0.0307798	2.8723	0.951008	1
NR_003611	BMS1P5	BMS1P1	BMS1, ribosome biogenesis factor pseudogene 1	10q11.22	-0.56995	3.97581	0.181835	0.682487
NM_203281	BMX	BMX	BMX non-receptor tyrosine kinase	Xp22.2	-1.30677	-2.74691	0.639766	1
NM_001717	BNC1	BNC1	basonuclin 1	15q25.2	0.352732	3.86358	0.405887	0.921388
NM_017637	BNC2	BNC2	basonuclin 2	9p22.3-p22.2	-0.481535	5.24183	0.253023	0.793314
NM_013979	BNIP1	BNIP1	BCL2 interacting protein 1	5q35.1	0.054076	3.17752	0.903525	1
NM_004330	BNIP2	BNIP2	BCL2 interacting protein 2	15q22.2	0.244644	5.88087	0.559993	0.994647
NR_033985	FLJ26245	LINC02167	long intergenic non-protein coding RNA 2167	16p11.1	-5.33416	-2.00702	0.000329726	0.00609928
NM_001029881	CIB4	CIB4	calcium and integrin binding family member 4	2p23.3	-5.33019	-2.00887	0.000329726	0.00609928
NM_138278	BNIPL	BNIPL	BCL2 interacting protein like	1q21.3	-0.763871	-0.801317	0.225783	0.756652
NM_175747	OLIG3	OLIG3	oligodendrocyte transcription factor 3	6q23.3	-5.33019	-2.00887	0.000329726	0.00609928
NM_001159651	BOD1	BOD1	biorientation of chromosomes in cell division 1	5q35.2	0.0972413	5.19116	0.81752	1
NM_148894	BOD1L	BOD1L1	biorientation of chromosomes in cell division 1 like 1	4p15.33	0.144415	6.32605	0.730699	1
NR_033372	BOD1P	BOD1L2	biorientation of chromosomes in cell division 1 like 2	18q21.31	-0.379717	-1.99218	0.81577	1
NM_032515	BOK	BOK	BOK, BCL2 family apoptosis regulator	2q37.3	0.795438	6.62024	0.058845	0.359081
NR_033346	BOK-AS1	BOK-AS1	BOK antisense RNA 1	2q37.3	2.07147	-2.14782	0.0632029	0.375045
NM_016074	BOLA1	BOLA1	bolA family member 1	1q21.2	-0.0683255	2.96409	0.87538	1
NM_001031827	BOLA2	BOLA2	bolA family member 2	16p11.2	-0.592222	5.32432	0.160104	0.637846
NM_001039182	BOLA2B	BOLA2B	bolA family member 2B	16p11.2	-0.592222	5.32432	0.160104	0.637846
NM_001035505	BOLA3	BOLA3	bolA family member 3	2p13.1	-0.261587	4.04176	0.540846	0.986337
NR_045636	BOLA3-AS1	BOLA3-AS1	BOLA3 antisense RNA 1 (head to head)	2p13.1	0.0278495	2.36351	0.960371	1
NM_015201	BOP1	BOP1	block of proliferation 1	8q24.3	0.710443	5.08726	0.0925451	0.471951
NM_024808	BORA	BORA	bora, aurora kinase A activator	13q21.33	0.0727375	4.19463	0.864531	1
NM_199186	BPGM	BPGM	bisphosphoglycerate mutase	7q33	-0.195587	4.56702	0.644706	1
NR_026648	BPHL	BPHL	biphenyl hydrolase like	6p25.2	0.0248507	4.00814	0.958223	1
NM_006085	BPNT1	BPNT1	3'(2'), 5'-bisphosphate nucleotidase 1	1q41	0.0229996	4.41871	0.958836	1
NM_004459	BPTF	BPTF	bromodomain PHD finger transcription factor	17q24.2	0.0607868	6.287	0.885006	1
NM_004333	BRAF	BRAF	B-Raf proto-oncogene, serine/threonine kinase	7q34	0.105444	2.78055	0.815187	1
NM_006768	BRAP	BRAP	BRCA1 associated protein	12q24.12	0.253077	4.64814	0.549418	0.988114
NM_152743	BRAT1	BRAT1	BRCA1 associated ATM activator 1	7p22.3	-0.242553	5.9579	0.563358	0.997084
NM_007298	BRCA1	BRCA1	BRCA1, DNA repair associated	17q21.31	-0.0881662	5.96207	0.834031	1
NM_000059	BRCA2	BRCA2	BRCA2, DNA repair associated	13q13.1	0.24014	4.53654	0.570828	1
NM_001242640	BRCC3	BRCC3	BRCA1/BRCA2-containing complex subunit 3	Xq28	-0.0745102	5.22111	0.860093	1
NM_014577	BRD1	BRD1	bromodomain containing 1	22q13.33	0.312275	5.66812	0.457328	0.96122
NM_005104_2	BRD2	BRD2	bromodomain containing 2	6p21.32	0.635664	7.82528	0.129629	0.578483
NM_007371	BRD3	BRD3	bromodomain containing 3	9q34.2	0.141283	5.96941	0.736718	1
NM_058243	BRD4	BRD4	bromodomain containing 4	19p13.12	0.0763233	7.06102	0.855516	1
NM_001173984	BRD7	BRD7	bromodomain containing 7	16q12.1	0.213644	5.93848	0.610889	1
NR_002730	BRD7P3	BRD7P3	bromodomain containing 7 pseudogene 3	6q22.31	-0.214248	-2.9066	1	1
NM_139199	BRD8	BRD8	bromodomain containing 8	5q31.2	-0.157686	6.4995	0.707083	1
NM_001009877	BRD9	BRD9	bromodomain containing 9	5p15.33	0.278273	5.77714	0.507337	0.967235
NM_199194	BRE	BABAM2	BRISC and BRCA1 A complex member 2	2p23.2	-0.151708	5.38333	0.718633	1
NR_015445	BREA2	BREA2			-0.556475	-0.93248	0.44642	0.952469
NM_145685	BRF1	BRF1	BRF1, RNA polymerase III transcription initiation factor subunit	14q32.33	0.18157	5.146	0.666854	1
NM_018310	BRF2	BRF2	BRF2, RNA polymerase III transcription initiation factor subunit	8p11.23	-0.0112923	3.33644	0.989792	1
NM_182537	HTR3D	HTR3D	5-hydroxytryptamine receptor 3D	3q27.1	-5.3257	-2.01357	0.000329726	0.00609928
NM_080626	BRI3BP	BRI3BP	BRI3 binding protein	12q24.31	0.42305	3.02457	0.327987	0.86362
NM_032043	BRIP1	BRIP1	BRCA1 interacting protein C-terminal helicase 1	17q23.2	0.0344422	6.14315	0.935301	1
NM_018321	BRIX1	BRIX1	BRX1, biogenesis of ribosomes	5p13.2	0.0265039	5.33521	0.950751	1
NM_018462	BRK1	BRK1	BRICK1, SCAR/WAVE actin nucleating complex subunit	3p25.3	0.384979	7.28608	0.357844	0.891546
NM_001024957	BRMS1	BRMS1	breast cancer metastasis suppressor 1	11q13.2	-0.302489	5.79354	0.471429	0.967235
NM_032352	BRMS1L	BRMS1L	breast cancer metastasis-suppressor 1 like	14q13.2	0.144968	3.41989	0.735055	1
NM_144695	BROX	BROX	BRO1 domain and CAAX motif containing	1q41	-0.0212574	4.33918	0.96267	1
NM_015415	BRP44	MPC2	mitochondrial pyruvate carrier 2	1q24.2	-0.465746	5.91126	0.267535	0.797421
NM_152376	UBXN10	UBXN10	UBX domain protein 10	1p36.12	-5.31562	-0.696232	5.24934e-09	3.10111e-07
NM_001003694	BRPF1	BRPF1	bromodomain and PHD finger containing 1	3p25.3	0.448831	5.49465	0.286168	0.819528
NM_015695	BRPF3	BRPF3	bromodomain and PHD finger containing 3	6p21.31	0.566062	5.57015	0.178532	0.675462
NM_032430	BRSK1	BRSK1	BR serine/threonine kinase 1	19q13.42	0.688825	2.87456	0.113915	0.534101
NM_003957	BRSK2	BRSK2	BR serine/threonine kinase 2	11p15.5	1.26566	0.0184592	0.016113	0.143723
NM_018963	BRWD1	BRWD1	bromodomain and WD repeat domain containing 1	21q22.2	-0.121875	5.67816	0.772173	1
NR_033800	BRWD1-IT2	BRWD1-AS2	BRWD1 antisense RNA 2	21q22.2	-3.18234	-2.8321	0.265211	0.794151
NM_153252	BRWD3	BRWD3	bromodomain and WD repeat domain containing 3	Xq21.1	0.459821	4.86924	0.276634	0.806374
NR_037948	BSCL2	BSCL2	BSCL2, seipin lipid droplet biogenesis associated	11q12.3	-0.696598	4.94577	0.0994947	0.489426
NM_001143888	BSDC1	BSDC1	BSD domain containing 1	1p35.1	-0.0490473	6.40416	0.907178	1
NM_198591	BSG	BSG	basigin (Ok blood group)	19p13.3	-0.300915	9.69475	0.471408	0.967235
NM_003458	BSN	BSN	bassoon presynaptic cytomatrix protein	3p21.31	-0.932721	-0.744659	0.14616	0.60807
NR_038866	BSN-AS2	BSN-AS2	BSN antisense RNA 2 (head to head)	3p21.31	-2.20896	-2.13139	0.0417358	0.283453
NM_002463	MX2	MX2	MX dynamin like GTPase 2	21q22.3	-5.3154	0.796546	4.43582e-15	6.2535e-13
NM_004334	BST1	BST1	bone marrow stromal cell antigen 1	4p15.32	0.0501325	-1.81559	1	1
NM_004335	BST2	BST2	bone marrow stromal cell antigen 2	19p13.11	-0.994302	7.00631	0.0185026	0.159626
NM_003972	BTAF1	BTAF1	B-TFIID TATA-box binding protein associated factor 1	10q23.32	0.231572	6.79691	0.580353	1
NM_001011885	BTBD1	BTBD1	BTB domain containing 1	15q25.2	-0.0123092	6.15848	0.977481	1
NM_032320	BTBD10	BTBD10	BTB domain containing 10	11p15.3	-0.0539612	6.16497	0.898188	1
NM_001018072	BTBD11	BTBD11	BTB domain containing 11	12q23.3	0.787161	3.82227	0.0647296	0.380244
NM_144587	BTBD16	BTBD16	BTB domain containing 16	10q26.13	1.00931	-0.108597	0.0570304	0.3524
NM_020465	NDRG4	NDRG4	NDRG family member 4	16q21	-5.30823	3.69325	2.21752e-23	9.59671e-21
NM_017797	BTBD2	BTBD2	BTB domain containing 2	19p13.3	0.324781	7.11635	0.437873	0.948111
NM_181443	BTBD3	BTBD3	BTB domain containing 3	20p12.2	-0.0187964	5.35972	0.96587	1
NM_033271	BTBD6	BTBD6	BTB domain containing 6	14q32.33	0.0196787	5.50926	0.963739	1
NM_001002860	BTBD7	BTBD7	BTB domain containing 7	14q32.12	0.497438	6.38355	0.235921	0.77536
NM_183242	BTBD8	BTBD8	BTB domain containing 8	1p22.1	-0.825156	-0.461565	0.142223	0.600141
NM_052893	BTBD9	BTBD9	BTB domain containing 9	6p21.2	-0.224807	3.88214	0.597312	1
NM_001729	BTC	BTC	betacellulin	4q13.3	-1.41704	0.767734	0.00419375	0.0513093
NM_000060	BTD	BTD	biotinidase	3p25.1	-0.304396	4.01274	0.47332	0.967235
NM_001207	BTF3	BTF3	basic transcription factor 3	5q13.2	0.511683	8.47362	0.221653	0.748591
NM_001243767	BTF3L4	BTF3L4	basic transcription factor 3 like 4	1p32.3	-0.0540615	6.04666	0.897976	1
NR_026983	BTF3P11	BTF3P11	basic transcription factor 3 pseudogene 11	13q22.3	1.33249	-2.2954	0.389951	0.9165
NM_001731	BTG1	BTG1	BTG anti-proliferation factor 1	12q21.33	0.323778	5.88673	0.44062	0.948514
NM_006763	BTG2	BTG2	BTG anti-proliferation factor 2	1q32.1	-0.611569	1.7238	0.177483	0.673846
NM_006806	BTG3	BTG3	BTG anti-proliferation factor 3	21q21.1	-0.677374	5.78333	0.107748	0.516642
NM_000061	BTK	BTK	Bruton tyrosine kinase	Xq22.1	-0.750185	-2.40052	0.746917	1
NM_181780	BTLA	BTLA	B and T lymphocyte associated	3q13.2	-0.042827	-2.92571	1	1
NM_001732	BTN1A1	BTN1A1	butyrophilin subfamily 1 member A1	6p22.2	2.6427	-2.92751	0.51014	0.967235
NM_078476	BTN2A1	BTN2A1	butyrophilin subfamily 2 member A1	6p22.2	0.185317	5.54644	0.659169	1
NM_001197238	BTN2A2	BTN2A2	butyrophilin subfamily 2 member A2	6p22.2	0.328092	4.93646	0.43638	0.947722
NR_027795	BTN2A3P	BTN2A3P	butyrophilin subfamily 2 member A3, pseudogene	6p22.2	0.265096	2.50972	0.542777	0.986337
NM_194441	BTN3A1	BTN3A1	butyrophilin subfamily 3 member A1	6p22.2	0.0221104	4.75584	0.959393	1
NM_001197249	BTN3A2	BTN3A2	butyrophilin subfamily 3 member A2	6p22.2	-0.144922	5.97468	0.730306	1
NM_006994	BTN3A3	BTN3A3	butyrophilin subfamily 3 member A3	6p22.2	-0.266411	4.42563	0.529921	0.981084
NM_152547	BTNL9	BTNL9	butyrophilin like 9	5q35.3	0.741773	-2.8268	1	1
NM_003939	BTRC	BTRC	beta-transducin repeat containing E3 ubiquitin protein ligase	10q24.32	-0.402913	4.60603	0.340794	0.876327
NM_004336	BUB1	BUB1	BUB1 mitotic checkpoint serine/threonine kinase	2q13	0.180913	6.50408	0.665734	1
NM_001211	BUB1B	BUB1B	BUB1 mitotic checkpoint serine/threonine kinase B	15q15.1	0.343898	6.9089	0.411295	0.927283
NM_001007793	BUB3	BUB3	BUB3, mitotic checkpoint protein	10q26.13	0.0924258	7.6403	0.825175	1
NM_001159736	BUD13	BUD13	BUD13 homolog	11q23.3	0.290366	5.13637	0.490844	0.967235
NM_003910	BUD31	BUD31	BUD31 homolog	7q22.1	-0.202031	6.11777	0.630126	1
NR_015369	FLJ42709	NR2F1-AS1	NR2F1 antisense RNA 1	5q15	-5.30679	-2.0211	0.000538464	0.00927804
NR_037157	BVES-AS1	BVES-AS1	BVES antisense RNA 1	6q21	1.15308	-2.49574	0.484513	0.967235
NM_004053	BYSL	BYSL	bystin like	6p21.1	0.159199	5.00054	0.706219	1
NM_024418	BZRAP1	TSPOAP1	TSPO associated protein 1	17q22	0.329731	-2.48707	1	1
NM_001207067	BZW1	BZW1	basic leucine zipper and W2 domains 1	2q33.1	0.44156	8.33708	0.291297	0.826586
NM_014038	BZW2	BZW2	basic leucine zipper and W2 domains 2	7p21.1	0.184112	6.44153	0.660529	1
NM_007021	C10orf10	DEPP1	DEPP1, autophagy regulator	10q11.21	0.925454	4.50386	0.0300756	0.227234
NR_038373	C10orf103	DNAJC9-AS1	DNAJC9 antisense RNA 1	10q22.2	0.308315	-1.60214	0.733225	1
NM_173554	C10orf107	CABCOCO1	ciliary associated calcium binding coiled-coil 1	10q21.2	-3.35141	-2.01986	0.00543927	0.0620097
NR_027151	C10orf108	PRR26	proline rich 26	10p15.3	-0.698122	2.4225	0.113363	0.532214
NM_032024	C10orf11	LRMDA	leucine rich melanocyte differentiation associated	10q22.2-q22.3	-0.831226	-0.798167	0.195653	0.707523
NM_153244	C10orf111	C10orf111	chromosome 10 open reading frame 111	10p13	-0.166907	-1.2969	0.89168	1
NM_001010911	C10orf114	CASC10	cancer susceptibility 10	10p12.31	-0.87325	1.72115	0.0552441	0.345237
NM_006829	C10orf116	ADIRF	adipogenesis regulatory factor	10q23.2	2.64081	-2.92833	0.51014	0.967235
NM_018017	C10orf118	CCDC186	coiled-coil domain containing 186	10q25.3	0.381632	4.17178	0.367835	0.900621
NM_015652	C10orf12	LCOR	ligand dependent nuclear receptor corepressor	10q24.1	0.539319	2.26711	0.2241	0.754231
NM_198472	C10orf125	FUOM	fucose mutarotase	10q26.3	-0.206816	1.79852	0.6361	1
NM_207321	C10orf129	ACSM6	acyl-CoA synthetase medium chain family member 6	10q23.33	-1.36518	-2.72293	0.639766	1
NM_001130446	C10orf131	CC2D2B	coiled-coil and C2 domain containing 2B	10q24.1	-2.27141	-2.47878	0.15157	0.618163
NM_015608	C10orf137	EDRF1	erythroid differentiation regulatory factor 1	10q26.2	-0.0288867	4.52677	0.947291	1
NM_207371	C10orf140	SKIDA1	SKI/DACH domain containing 1	10p12.31	-0.410397	0.639855	0.409063	0.92449
NM_001163814	C10orf2	TWNK	twinkle mtDNA helicase	10q24.31	0.177975	4.71667	0.674423	1
NM_001039380	C10orf25	C10orf25	chromosome 10 open reading frame 25	10q11.21	0.532126	0.287984	0.317517	0.858196
NM_001083913	C10orf26	WBP1L	WW domain binding protein 1 like	10q24.32	0.158111	5.35955	0.707184	1
NM_001256621	C10orf28	R3HCC1L	R3H domain and coiled-coil containing 1 like	10q24.2	0.326833	4.2395	0.442048	0.949534
NM_144591	C10orf32	BORCS7	BLOC-1 related complex subunit 7	10q24.32	-0.424675	3.59862	0.320358	0.862494
NR_037644	C10orf32-AS3MT	BORCS7-ASMT	BORCS7-ASMT readthrough (NMD candidate)	10q24.32	0.0389658	1.6478	0.95182	1
NM_145306	C10orf35	FAM241B	family with sequence similarity 241 member B	10q22.1	-0.796282	3.17379	0.0658229	0.383777
NM_153810	C10orf46	CACUL1	CDK2 associated cullin domain 1	10q26.11	0.218019	5.91619	0.603548	1
NM_153256	C10orf47	PROSER2	proline and serine rich 2	10p14	0.817294	5.49287	0.0530997	0.335924
NM_022153	C10orf54	VSIR	V-set immunoregulatory receptor	10q22.1	-0.0528036	-2.73094	1	1
NM_001001791	C10orf55	C10orf55	chromosome 10 open reading frame 55	10q22.2	-0.113946	3.23964	0.795246	1
NM_001736	C5AR1	C5AR1	complement C5a receptor 1	19q13.32	-5.29278	0.428916	1.42394e-13	1.60595e-11
NM_080869	WFDC12	WFDC12	WAP four-disulfide core domain 12	20q13.12	-5.27055	-2.04366	0.000538464	0.00927804
NM_153714	C10orf67	C10orf67	chromosome 10 open reading frame 67	10p12.2	-1.20533	0.0844293	0.0227556	0.185403
NM_024688	C10orf68	CCDC7	coiled-coil domain containing 7	10p11.22	-0.772844	0.0870097	0.138528	0.59563
NM_024541	C10orf76	ARMH3	armadillo-like helical domain containing 3	10q24.32	0.106091	5.08193	0.802212	1
NM_144661	C10orf82	C10orf82	chromosome 10 open reading frame 82	10q25.3	-1.73931	-2.6355	0.39961	0.91818
NM_024942	C10orf88	C10orf88	chromosome 10 open reading frame 88	10q26.13	-0.0499145	3.62788	0.908312	1
NM_001004298	C10orf90	C10orf90	chromosome 10 open reading frame 90	10q26.2	-0.771955	-1.91759	0.518113	0.971043
NM_173541	C10orf91	C10orf91	chromosome 10 open reading frame 91 (putative)	10q26.3	-1.88266	-3.03879	1	1
NM_024886	C10orf95	C10orf95	chromosome 10 open reading frame 95	10q24.32	0.319573	-2.48372	1	1
NM_022761	C11orf1	C11orf1	chromosome 11 open reading frame 1	11q23.1	-0.344204	3.25106	0.422596	0.936243
NM_014206	C11orf10	TMEM258	transmembrane protein 258	11q12.2	0.197992	5.53834	0.637926	1
NM_013265	C11orf2	VPS51	VPS51, GARP complex subunit	11q13.1	0.49077	6.05322	0.242567	0.781904
NM_001039496	C11orf20	CATSPERZ	catsper channel auxiliary subunit zeta	11q13.1	0.220356	-1.30756	0.780594	1
NM_001142946	C11orf21	C11orf21	chromosome 11 open reading frame 21	11p15.5	2.16387	-2.48664	0.15157	0.618163
NM_022338	C11orf24	C11orf24	chromosome 11 open reading frame 24	11q13.2	-0.0352409	5.80585	0.933607	1
NM_020193	C11orf30	EMSY	EMSY, BRCA2 interacting transcriptional repressor	11q13.5	0.141824	4.42289	0.738527	1
NM_170746	C11orf31	SELENOH	selenoprotein H	11q12.1	-0.229855	5.94049	0.58406	1
NM_173573	C11orf35	LMNTD2	lamin tail domain containing 2	11p15.5	-0.670693	2.53559	0.125354	0.566194
NM_012194	C11orf41	KIAA1549L	KIAA1549 like	11p13	0.847573	5.34557	0.0448565	0.298059
NM_001256088	C11orf45	C11orf45	chromosome 11 open reading frame 45	11q24.3	-0.82953	0.716821	0.0868826	0.454795
NM_152316	C11orf46	ARL14EP	ADP ribosylation factor like GTPase 14 effector protein	11p14.1	0.35572	4.20189	0.401372	0.919186
NM_024099	C11orf48	LBHD1	LBH domain containing 1	11q12.3	-0.377055	5.41226	0.370088	0.902547
NM_024113	C11orf49	C11orf49	chromosome 11 open reading frame 49	11p11.2	0.0680363	5.22609	0.872576	1
NM_014042	C11orf51	ANAPC15	anaphase promoting complex subunit 15	11q13.4	0.301933	5.75251	0.472158	0.967235
NM_080659	C11orf52	C11orf52	chromosome 11 open reading frame 52	11q23.1	-0.235345	1.72505	0.604901	1
NM_014039	C11orf54	C11orf54	chromosome 11 open reading frame 54	11q21	-0.288287	4.04401	0.497929	0.967235
NM_001082969	C11orf57	NKAPD1	NKAP domain containing 1	11q23.1	0.122123	5.16342	0.772542	1
NM_014267	C11orf58	C11orf58	chromosome 11 open reading frame 58	11p15.2	0.0143314	7.10075	0.973008	1
NM_024631	C11orf61	MSANTD2	Myb/SANT DNA binding domain containing 2	11q24.2	-0.0838968	3.85816	0.847655	1
NM_024806	C11orf63	JHY	junctional cadherin complex regulator	11q24.1	-0.908822	2.59267	0.0389927	0.27475
NM_152587	C11orf65	C11orf65	chromosome 11 open reading frame 65	11q22.3	-0.306705	-1.5528	0.747083	1
NM_024684	C11orf67	AAMDC	adipogenesis associated Mth938 domain containing	11q14.1	-0.091785	3.55155	0.833856	1
NM_031450	C11orf68	C11orf68	chromosome 11 open reading frame 68	11q13.1	-0.379893	5.67473	0.366082	0.900587
NM_001195005	C11orf70	CFAP300	cilia and flagella associated protein 300	11q22.1	0.697983	-0.321347	0.236223	0.77536
NM_019021	C11orf71	C11orf71	chromosome 11 open reading frame 71	11q23.2	-0.632529	0.44359	0.208676	0.731957
NR_024598	C11orf73	HIKESHI	Hikeshi, heat shock protein nuclear import factor	11q14.2	0.0204775	4.75336	0.963016	1
NM_138787	C11orf74	C11orf74	chromosome 11 open reading frame 74	11p12	-0.121607	2.6342	0.787977	1
NM_020179	C11orf75	SMCO4	single-pass membrane protein with coiled-coil domains 4	11q21	-1.07193	2.44031	0.0150688	0.136052
NM_024650	C11orf80	C11orf80	chromosome 11 open reading frame 80	11q13.2	0.339798	4.96703	0.420432	0.935191
NM_145018	C11orf82	DDIAS	DNA damage induced apoptosis suppressor	11q14.1	-0.0170251	4.37795	0.970244	1
NM_001085372	C11orf83	UQCC3	ubiquinol-cytochrome c reductase complex assembly factor 3	11q12.3	-0.151749	4.11458	0.721784	1
NM_138471	C11orf84	SPINDOC	spindlin interactor and repressor of chromatin binding	11q13.1	-0.171891	5.76814	0.68261	1
NM_001037225	C11orf85	MAJIN	membrane anchored junction protein	11q13.1	-1.90344	-3.0303	1	1
NM_001136485	C11orf86	C11orf86	chromosome 11 open reading frame 86	11q13.2	0.338498	-2.49158	1	1
NM_001127392	C11orf9	MYRF	myelin regulatory factor	11q12.2	0.727176	6.50807	0.0838417	0.444504
NM_001166692	C11orf91	C11orf91	chromosome 11 open reading frame 91	11p13	0.520034	0.855814	0.269613	0.800452
NM_001136105	C11orf93	COLCA2	colorectal cancer associated 2	11q23.1	-1.89861	-3.03235	1	1
NM_001080446	C11orf94	C11orf94	chromosome 11 open reading frame 94	11p11.2	-1.19141	-2.50059	0.484513	0.967235
NM_001144936	C11orf95	C11orf95	chromosome 11 open reading frame 95	11q13.1	0.276818	5.02414	0.510635	0.967416
NM_001145033	C11orf96	C11orf96	chromosome 11 open reading frame 96	11p11.2	-0.426274	-1.9152	0.678913	1
NM_021640	C12orf10	C12orf10	chromosome 12 open reading frame 10	12q13.13	-0.0360241	5.09896	0.933395	1
NM_152261	C12orf23	TMEM263	transmembrane protein 263	12q23.3	0.480307	6.00022	0.252765	0.793218
NM_032230	C12orf26	METTL25	methyltransferase like 25	12q21.31	0.035053	2.63651	0.942385	1
NM_001009894	C12orf29	C12orf29	chromosome 12 open reading frame 29	12q21.32	0.359694	4.60182	0.39518	0.91818
NM_001252499	C12orf32	RHNO1	RAD9-HUS1-RAD1 interacting nuclear orphan 1	12p13.33	0.0367558	5.55435	0.930986	1
NR_034140	C12orf33	LINC00612	long intergenic non-protein coding RNA 612	12p13.31	1.85579	-3.03482	1	1
NM_032829	C12orf34	FAM222A	family with sequence similarity 222 member A	12q24.11	-0.404364	2.28004	0.361938	0.896559
NM_018169	C12orf35	KIAA1551	KIAA1551	12p11.21	0.766517	5.33108	0.0694733	0.397803
NR_036555	C12orf36	LINC01559	long intergenic non-protein coding RNA 1559	12p13.1	0.061739	0.123348	0.956198	1
NR_038868	C12orf37	LINC00615	long intergenic non-protein coding RNA 615	12q21.33	-2.47739	-2.40705	0.0930693	0.471951
NM_030572	C12orf39	SPX	spexin hormone	12p12.1	-1.82418	-2.02197	0.0935584	0.471951
NM_020374	C12orf4	C12orf4	chromosome 12 open reading frame 4	12p13.32	0.105612	4.63843	0.803277	1
NM_022895	C12orf43	C12orf43	chromosome 12 open reading frame 43	12q24.31	0.355009	4.34047	0.401615	0.919319
NM_001098673	C12orf44	ATG101	autophagy related 101	12q13.13	0.145345	5.37617	0.730181	1
NM_152318	C12orf45	C12orf45	chromosome 12 open reading frame 45	12q23.3	-0.35342	3.00989	0.413137	0.928314
NR_015404	C12orf47	MAPKAPK5-AS1	MAPKAPK5 antisense RNA 1	12q24.12	0.32029	3.34484	0.455783	0.95914
NM_024738	C12orf49	C12orf49	chromosome 12 open reading frame 49	12q24.22	-0.329414	5.20357	0.434367	0.945584
NM_020375	C12orf5	TIGAR	TP53 induced glycolysis regulatory phosphatase	12p13.32	0.0941327	3.76622	0.826677	1
NM_152589	C12orf50	C12orf50	chromosome 12 open reading frame 50	12q21.32	-1.36518	-2.72293	0.639766	1
NM_001109662	C12orf51	HECTD4	HECT domain E3 ubiquitin protein ligase 4	12q24.13	0.286766	5.91918	0.494396	0.967235
NM_032848	C12orf52	RITA1	RBPJ interacting and tubulin associated 1	12q24.13	-0.185964	5.04918	0.659808	1
NM_153685	C12orf53	PIANP	PILR alpha associated neural protein	12p13.31	1.10555	1.77888	0.0147501	0.134026
NM_001170633	C12orf56	C12orf56	chromosome 12 open reading frame 56	12q14.2	0.468163	-2.6498	1	1
NM_138425	C12orf57	C12orf57	chromosome 12 open reading frame 57	12p13.31	-0.117709	5.75586	0.779796	1
NM_153022	C12orf59	TMEM52B	transmembrane protein 52B	12p13.2	-2.50701	-2.39364	0.0572657	0.3524
NM_175874	C12orf60	C12orf60	chromosome 12 open reading frame 60	12p12.3	0.293368	0.223161	0.569697	1
NM_175895	C12orf61	LINC01465	long intergenic non-protein coding RNA 1465	12q14.1	0.1675	-0.613706	0.858412	1
NM_152269	C12orf65	C12orf65	chromosome 12 open reading frame 65	12q24.31	0.131206	4.10337	0.759705	1
NM_152440	C12orf66	C12orf66	chromosome 12 open reading frame 66	12q14.2	-0.297481	2.39494	0.494859	0.967235
NM_000092	COL4A4	COL4A4	collagen type IV alpha 4 chain	2q36.3	-5.25685	5.6038	4.63968e-25	2.61636e-22
NM_001013698	C12orf69	SMCO3	single-pass membrane protein with coiled-coil domains 3	12p12.3	1.85535	-3.03501	1	1
NM_001145010	C12orf70	SMCO2	single-pass membrane protein with coiled-coil domains 2	12p11.23	0.963519	-0.404001	0.0973562	0.48222
NM_001135570	C12orf73	C12orf73	chromosome 12 open reading frame 73	12q23.3	-0.279577	2.74227	0.525752	0.978034
NM_001178097	C12orf74	C12orf74	chromosome 12 open reading frame 74	12q22	-0.0691149	-2.40374	1	1
NM_001145199	C12orf75	C12orf75	chromosome 12 open reading frame 75	12q23.3	0.321501	8.49941	0.441864	0.949534
NM_207435	C12orf76	C12orf76	chromosome 12 open reading frame 76	12q24.11	-0.12189	2.65005	0.790428	1
NM_014059	C13orf15	RGCC	regulator of cell cycle	13q14.11	1.08055	-0.359882	0.0661869	0.384537
NM_032849	C13orf33	MEDAG	mesenteric estrogen dependent adipogenesis	13q12.3	-1.89861	-3.03235	1	1
NM_007176	C14orf1	ERG28	ergosterol biosynthesis 28 homolog	14q24.3	-0.000590432	5.11826	1	1
NM_017799	C14orf101	TMEM260	transmembrane protein 260	14q22.3	-0.118218	4.08676	0.783309	1
NM_017970	C14orf102	NRDE2	NRDE-2, necessary for RNA interference, domain containing	14q32.11	-0.446175	2.40402	0.312823	0.854402
NM_018168	C14orf105	CCDC198	coiled-coil domain containing 198	14q22.3	-1.10517	5.62118	0.0092087	0.0932343
NM_015676	C14orf109	TMEM251	transmembrane protein 251	14q32.12	-1.16191	3.86546	0.00694384	0.0756277
NM_017972	C14orf118	GPATCH2L	G-patch domain containing 2 like	14q24.3	0.537846	4.35984	0.204038	0.724274
NM_017924	C14orf119	C14orf119	chromosome 14 open reading frame 119	14q11.2	-0.0994377	6.05572	0.812911	1
NM_080664	C14orf126	DTD2	D-tyrosyl-tRNA deacylase 2 (putative)	14q12	0.151172	3.37346	0.726781	1
NM_016472	C14orf129	GSKIP	GSK3B interacting protein	14q32.2	-0.0815516	4.76986	0.848028	1
NM_001252507	C14orf132	C14orf132	chromosome 14 open reading frame 132	14q32.2	0.754262	5.65626	0.0737597	0.412329
NM_001193317	C14orf133	VIPAS39	VPS33B interacting protein, apical-basolateral polarity regulator, spe-39 homolog	14q24.3	0.114062	4.36788	0.788681	1
NM_022495	C14orf135	PCNX4	pecanex homolog 4	14q23.1	-0.0432271	6.3867	0.918406	1
NM_032490	C14orf142	GON7	GON7, KEOPS complex subunit	14q32.12	-0.462176	3.37536	0.28144	0.813375
NM_144581	C14orf149	L3HYPDH	trans-L-3-hydroxyproline dehydratase	14q23.1	0.118892	4.84104	0.779418	1
NM_001102368	C14orf159	DGLUCY	D-glutamate cyclase	14q32.11	-0.61076	5.88368	0.146617	0.609015
NM_016039	C14orf166	RTRAF	RNA transcription, translation and transport factor	14q22.1	0.00998839	6.33115	0.981513	1
NR_023923	C14orf167	DHRS4-AS1	DHRS4 antisense RNA 1	14q11.2	0.0879553	4.01949	0.84148	1
NM_024644	C14orf169	RIOX1	ribosomal oxygenase 1	14q24.3	0.0259641	4.2845	0.953945	1
NM_001146683	C14orf176	TMEM253	transmembrane protein 253	14q11.2	-0.874444	-0.978791	0.212874	0.738924
NM_174943	C14orf178	C14orf178	chromosome 14 open reading frame 178	14q24.3	0.447729	-2.642	1	1
NM_001012706	C14orf182	LINC01588	long intergenic non-protein coding RNA 1588	14q21.3	1.28133	0.120805	0.0163969	0.145508
NM_001014830	C14orf183	LINC01599	long intergenic non-protein coding RNA 1599	14q21.3	-0.554315	-2.64522	1	1
NM_004894	C14orf2	ATP5MPL	ATP synthase membrane subunit 6.8PL	14q32.33	0.113527	5.49968	0.787675	1
NM_174913	C14orf21	NOP9	NOP9 nucleolar protein	14q12	0.189513	4.38123	0.655608	1
NM_001017923	C14orf28	C14orf28	chromosome 14 open reading frame 28	14q21.2	0.13812	2.13538	0.771573	1
NM_001001872	C14orf37	ARMH4	armadillo-like helical domain containing 4	14q23.1	0.717491	3.69473	0.0940834	0.47293
NM_174978	C14orf39	C14orf39	chromosome 14 open reading frame 39	14q23.1	1.36192	-2.40928	0.327071	0.862969
NM_001043318	C14orf43	ELMSAN1	ELM2 and Myb/SANT domain containing 1	14q24.3	0.816812	6.78351	0.0523323	0.332827
NM_025057	C14orf45	BBOF1	basal body orientation factor 1	14q24.3	-0.419741	2.37672	0.340852	0.876327
NM_152592	C14orf49	SYNE3	spectrin repeat containing nuclear envelope family member 3	14q32.13	-0.641272	0.171026	0.234484	0.773084
NR_037933	C14orf55	ADAM20P1	ADAM metallopeptidase domain 20 pseudogene 1	14q24.2	-0.182488	-1.03697	0.90749	1
NM_174891	C14orf79	CLBA1	clathrin binding box of aftiphilin containing 1	14q32.33	-0.900247	3.63616	0.0359554	0.258138
NM_001198983	C14orf80	TEDC1	tubulin epsilon and delta complex 1	14q32.33	-0.175576	5.03031	0.677541	1
NM_021944	C14orf93	C14orf93	chromosome 14 open reading frame 93	14q11.2	0.137703	2.92504	0.753701	1
NM_020447	C15orf17	FAM219B	family with sequence similarity 219 member B	15q24.1-q24.2	0.00488976	6.24145	0.991321	1
NM_033286	C15orf23	KNSTRN	kinetochore localized astrin (SPAG5) binding protein	15q15.1	-0.100128	5.62066	0.812843	1
NM_020154	C15orf24	EMC7	ER membrane protein complex subunit 7	15q14	-0.433547	5.65825	0.302417	0.843506
NM_152335	C15orf27	TMEM266	transmembrane protein 266	15q24.2	-3.19248	-2.82787	0.265211	0.794151
NM_024713	C15orf29	KATNBL1	katanin regulatory subunit B1 like 1	15q14	0.345328	4.64101	0.413722	0.928509
NM_153040	C15orf32	C15orf32	chromosome 15 open reading frame 32	15q26.1	1.93579	-2.21276	0.0957438	0.476644
NM_152647	C15orf33	FAM227B	family with sequence similarity 227 member B	15q21.2	-0.323633	0.0659286	0.566347	0.999066
NR_027262	C15orf34	HEXA-AS1	HEXA antisense RNA 1	15q23	-1.9635	-1.72815	0.0331318	0.244469
NR_028330	C15orf37	ST20-AS1	ST20 antisense RNA 1	15q25.1	0.897195	1.14444	0.0537942	0.338876
NM_182616	C15orf38	ARPIN	actin related protein 2/3 complex inhibitor	15q26.1	0.239554	4.27724	0.571943	1
NM_001199058	C15orf38-AP3S2	C15orf38-AP3S2	C15orf38-AP3S2 readthrough	15q26.1	0.00798466	6.00228	0.985412	1
NM_015492	C15orf39	C15orf39	chromosome 15 open reading frame 39	15q24.2	0.65578	4.52988	0.121594	0.557874
NM_001160116	C15orf40	C15orf40	chromosome 15 open reading frame 40	15q25.2	0.220611	3.20653	0.604344	1
NM_001130010	C15orf41	C15orf41	chromosome 15 open reading frame 41	15q14	-0.607962	3.1585	0.159215	0.636483
NM_152259	C15orf42	TICRR	TOPBP1 interacting checkpoint and replication regulator	15q26.1	0.389247	5.27289	0.354902	0.889207
NR_045106	C15orf44	INTS14	integrator complex subunit 14	15q22.31	-0.016446	5.48328	0.969952	1
NM_197955	C15orf48	C15orf48	chromosome 15 open reading frame 48	15q21.1	-1.66181	-2.09268	0.13476	0.59117
NM_207380	C15orf52	CCDC9B	coiled-coil domain containing 9B	15q15.1	0.510887	7.43398	0.22275	0.750685
NM_001039905	C15orf56	C15orf56	chromosome 15 open reading frame 56	15q15.1	1.85579	-3.03482	1	1
NM_052849	C15orf57	CCDC32	coiled-coil domain containing 32	15q15.1	-0.11873	3.97631	0.782395	1
NM_001013657	C15orf58	GDPGP1	GDP-D-glucose phosphorylase 1	15q26.1	-0.269435	0.943304	0.58365	1
NM_001039614	C15orf59	C15orf59	chromosome 15 open reading frame 59	15q24.1	-2.69947	-2.92124	0.51014	0.967235
NM_001143936	C15orf61	C15orf61	chromosome 15 open reading frame 61	15q23	-0.469662	2.10886	0.285101	0.819021
NM_004878	PTGES	PTGES	prostaglandin E synthase	9q34.11	-5.25119	3.62394	6.82861e-23	2.82386e-20
NM_001199885	C15orf63	HYPK	huntingtin interacting protein K	15q15.3	-0.167356	4.78604	0.693118	1
NM_145270	C16orf11	PRR35	proline rich 35	16p13.3	-1.88266	-3.03879	1	1
NM_001040160	C16orf13	METTL26	methyltransferase like 26	16p13.3	0.221873	5.82233	0.597304	1
NM_001001410	C16orf42	TSR3	TSR3, acp transferase ribosome maturation factor	16p13.3	-0.36551	5.73975	0.384372	0.913626
NM_033201	C16orf45	C16orf45	chromosome 16 open reading frame 45	16p13.11	0.193328	4.12636	0.649989	1
NM_001100873	C16orf46	C16orf46	chromosome 16 open reading frame 46	16q23.2	-0.406339	1.7909	0.367263	0.900621
NM_032140	C16orf48	ENKD1	enkurin domain containing 1	16q22.1	-0.617505	5.03285	0.14354	0.602828
NM_001199055	C16orf5	CDIP1	cell death inducing p53 target 1	16p13.3	0.689667	2.02831	0.11337	0.532214
NM_001164579	C16orf52	MOSMO	modulator of smoothened	16p12.2	-0.155848	4.10613	0.71469	1
NM_024516	C16orf53	PAGR1	PAXIP1 associated glutamate rich protein 1	16p11.2	-0.0590835	5.72356	0.888841	1
NM_153025	C16orf55	SPATA33	spermatogenesis associated 33	16q24.3	-0.822166	3.99881	0.0540146	0.339703
NM_001195302	C16orf57	USB1	U6 snRNA biogenesis phosphodiesterase 1	16q21	-0.0242802	6.28652	0.954365	1
NM_022744	C16orf58	C16orf58	chromosome 16 open reading frame 58	16p11.2	-0.0887409	6.26263	0.832594	1
NM_025108	C16orf59	TEDC2	tubulin epsilon and delta complex 2	16p13.3	-0.447982	4.07362	0.29194	0.827211
NM_020314	C16orf62	VPS35L	VPS35 endosomal protein sorting factor like	16p12.3	-0.214767	6.35125	0.608471	1
NM_004913	C16orf7	VPS9D1	VPS9 domain containing 1	16q24.3	-1.08868	4.49968	0.010738	0.105281
NM_025187	C16orf70	C16orf70	chromosome 16 open reading frame 70	16q22.1	-0.381639	4.89234	0.365819	0.900474
NM_139170	C16orf71	C16orf71	chromosome 16 open reading frame 71	16p13.3	-0.390114	-1.43438	0.653816	1
NM_014117	C16orf72	C16orf72	chromosome 16 open reading frame 72	16p13.2	0.61338	5.44287	0.145437	0.606161
NM_206967	C16orf74	C16orf74	chromosome 16 open reading frame 74	16q24.1	-0.356877	-1.08522	0.717329	1
NM_182563	C16orf79	BRICD5	BRICHOS domain containing 5	16p13.3	0.126552	2.91854	0.772302	1
NM_013242	C16orf80	CFAP20	cilia and flagella associated protein 20	16q21	-0.0593269	5.1438	0.88899	1
NM_001012984	C16orf86	C16orf86	chromosome 16 open reading frame 86	16q22.1	-0.219047	0.930274	0.672445	1
NM_001001436	C16orf87	C16orf87	chromosome 16 open reading frame 87	16q11.2	0.31147	3.13599	0.471123	0.967235
NM_001012991	C16orf88	KNOP1	lysine rich nucleolar protein 1	16p12.3	-0.12654	4.46906	0.766408	1
NM_138345	VWA5B2	VWA5B2	von Willebrand factor A domain containing 5B2	3q27.1	-5.23843	-2.05981	0.000538464	0.00927804
NM_001010878	C16orf91	C16orf91	chromosome 16 open reading frame 91	16p13.3	-0.121482	3.17484	0.780448	1
NM_001014979	C16orf93	CCDC189	coiled-coil domain containing 189	16p11.2	-0.940936	2.93021	0.0305276	0.229809
NM_001195125	C16orf95	C16orf95	chromosome 16 open reading frame 95	16q24.2	-0.652066	1.43052	0.1569	0.629801
NM_001105520	C17orf100	C17orf100	chromosome 17 open reading frame 100	17p13.1	0.386356	1.28828	0.410991	0.926924
NM_175902	C17orf101	OGFOD3	2-oxoglutarate and iron dependent oxygenase domain containing 3	17q25.3	0.225955	5.44046	0.591051	1
NM_152914	C17orf103	NATD1	N-acetyltransferase domain containing 1	17p11.2	-0.758625	3.82964	0.0761562	0.417066
NM_001136483	C17orf105	CFAP97D1	CFAP97 domain containing 1	17q21.31	-1.90344	-3.0303	1	1
NM_001145536	C17orf107	C17orf107	chromosome 17 open reading frame 107	17p13.2	0.581703	-0.520182	0.306933	0.848786
NM_001076680	C17orf108	LYRM9	LYR motif containing 9	17q11.2	-1.28884	1.61374	0.00538886	0.0616736
NM_001162995	C17orf109	SMIM5	small integral membrane protein 5	17q25.1	0.104498	-2.37624	1	1
NM_001162997	C17orf110	SMIM6	small integral membrane protein 6	17q25.1	-0.568622	0.958091	0.234529	0.773084
NM_002016	FLG	FLG	filaggrin	1q21.3	-5.22101	-2.06871	0.000538464	0.00927804
NM_024052	C17orf39	GID4	GID complex subunit 4 homolog	17p11.2	-0.778121	4.03692	0.0681292	0.392738
NM_020233	C17orf48	ADPRM	ADP-ribose/CDP-alcohol diphosphatase, manganese dependent	17p13.1	-0.457197	2.78734	0.294343	0.829789
NM_001142799	C17orf49	C17orf49	chromosome 17 open reading frame 49	17p13.1	0.199437	5.63371	0.634805	1
NM_145272	C17orf50	C17orf50	chromosome 17 open reading frame 50	17q12	0.742195	-2.82663	1	1
NM_001113434	C17orf51	C17orf51	chromosome 17 open reading frame 51	17p11.2	-0.414178	3.86813	0.331208	0.866504
NM_001171251	C17orf53	C17orf53	chromosome 17 open reading frame 53	17q21.31	-0.0743119	4.19076	0.863073	1
NM_144679	C17orf56	TEPSIN	TEPSIN, adaptor related protein complex 4 accessory protein	17q25.3	-0.350572	4.91766	0.406036	0.921388
NM_152347	C17orf57	EFCAB13	EF-hand calcium binding domain 13	17q21.32	-0.152989	3.06728	0.729338	1
NM_181656	C17orf58	C17orf58	chromosome 17 open reading frame 58	17q24.2	0.25092	3.44113	0.563089	0.996952
NM_017622	C17orf59	BORCS6	BLOC-1 related complex subunit 6	17p13.1	-0.358304	3.04706	0.406848	0.922286
NM_152766	C17orf61	TMEM256	transmembrane protein 256	17p13.1	-0.208947	4.72519	0.621108	1
NR_037719	C17orf61-PLSCR3	TMEM256-PLSCR3	TMEM256-PLSCR3 readthrough (NMD candidate)	17p13.1	0.105357	5.73316	0.802445	1
NR_036516	C17orf62	CYBC1	cytochrome b-245 chaperone 1	17q25.3	-0.300853	5.90923	0.473613	0.967235
NM_001077498	C17orf63	FAM222B	family with sequence similarity 222 member B	17q11.2	-0.460281	5.47152	0.274035	0.805607
NM_178542	C17orf65	ASB16-AS1	ASB16 antisense RNA 1	17q21.31	-0.823534	3.91884	0.0540856	0.339912
NM_001085430	C17orf67	C17orf67	chromosome 17 open reading frame 67	17q22	-0.453006	-0.509784	0.450541	0.9561
NR_026906	C17orf69	LINC02210	long intergenic non-protein coding RNA 2210	17q21.31	-0.474871	1.53042	0.302955	0.843506
NR_033338	C17orf70	FAAP100	Fanconi anemia core complex associated protein 100	17q25.3	0.0959442	5.72486	0.81977	1
NM_001191030	C17orf72	PRR29	proline rich 29	17q23.3	-1.71641	-0.859209	0.00985798	0.0985215
NM_022344	C17orf75	C17orf75	chromosome 17 open reading frame 75	17q11.2	-0.0458784	4.36826	0.915356	1
NR_027172	C17orf76-AS1	LRRC75A-AS1	LRRC75A antisense RNA 1	17p11.2	0.0339937	8.41721	0.935232	1
NM_152460	C17orf77	C17orf77	chromosome 17 open reading frame 77	17q25.1	1.85579	-3.03482	1	1
NM_018405	C17orf79	COPRS	coordinator of PRMT5 and differentiation stimulator	17q11.2	-0.77137	5.57119	0.0675794	0.389949
NM_017941	C17orf80	C17orf80	chromosome 17 open reading frame 80	17q25.1	0.147204	4.88273	0.727633	1
NM_203415	C17orf81	ELP5	elongator acetyltransferase complex subunit 5	17p13.1	-0.172793	5.16643	0.682137	1
NM_203425	C17orf82	C17orf82	chromosome 17 open reading frame 82	17q23.2	-1.88266	-3.03879	1	1
NM_001114118	C17orf85	NCBP3	nuclear cap binding subunit 3	17p13.2	0.0266695	6.40352	0.94957	1
NM_001086521	C17orf89	NDUFAF8	NADH:ubiquinone oxidoreductase complex assembly factor 8	17q25.3	-0.0181989	3.95458	0.969987	1
NM_001039842	C17orf90	OXLD1	oxidoreductase like domain containing 1	17q25.3	-0.51974	3.50387	0.225852	0.756652
NM_002515	NOVA1	NOVA1	NOVA alternative splicing regulator 1	14q12	-5.16158	-0.820308	2.05622e-08	1.08253e-06
NM_001013672	C17orf97	C17orf97	chromosome 17 open reading frame 97	17p13.3	-1.14327	3.07798	0.00870766	0.0892295
NM_181482	C18orf1	LDLRAD4	low density lipoprotein receptor class A domain containing 4	18p11.21	1.85579	-3.03482	1	1
NM_001201476	C18orf21	C18orf21	chromosome 18 open reading frame 21	18q12.2	0.0863028	3.53969	0.841235	1
NM_001008239	C18orf25	C18orf25	chromosome 18 open reading frame 25	18q21.1	0.492587	5.65465	0.241673	0.78105
NM_173629	C18orf26	DYNAP	dynactin associated protein	18q21.2	1.24345	-2.73163	0.639766	1
NM_001035005	C18orf32	C18orf32	chromosome 18 open reading frame 32	18q21.1	-0.438596	5.04601	0.298264	0.836533
NM_198995	C18orf34	CCDC178	coiled-coil domain containing 178	18q12.1	-3.88719	-2.63708	0.0755461	0.414611
NM_173529	C18orf54	C18orf54	chromosome 18 open reading frame 54	18q21.2	-0.0914927	4.29603	0.831221	1
NM_001012716	C18orf56	TYMSOS	TYMS opposite strand	18p11.32	-0.479976	0.258243	0.361709	0.896397
NM_001174123	C18orf63	C18orf63	chromosome 18 open reading frame 63	18q22.3	-3.16332	-2.8403	0.265211	0.794151
NM_013326	C18orf8	RMC1	regulator of MON1-CCZ1	18q11.2	-0.261433	4.69028	0.536203	0.984529
NM_019107	C19orf10	MYDGF	myeloid derived growth factor	19p13.3	-0.389373	6.61096	0.352893	0.887397
NM_001256046	C19orf12	C19orf12	chromosome 19 open reading frame 12	19q12	-0.24754	4.87236	0.557617	0.992495
NM_152474	C19orf18	C19orf18	chromosome 19 open reading frame 18	19q13.43	-0.732599	-1.47596	0.355637	0.889298
NM_173481	C19orf21	MISP	mitotic spindle positioning	19p13.3	1.34081	-0.673077	0.0277608	0.214514
NM_017914	C19orf24	C19orf24	chromosome 19 open reading frame 24	19p13.3	-0.82795	5.04769	0.0504866	0.325313
NM_152482	C19orf25	C19orf25	chromosome 19 open reading frame 25	19p13.3	-0.459388	5.14766	0.275717	0.805607
NM_003235	TG	TG	thyroglobulin	8q24.22	-5.1601	1.37154	9.45717e-17	1.67608e-14
NM_001080543	C19orf29	CACTIN	cactin, spliceosome C complex subunit	19p13.3	-0.109825	5.63956	0.794339	1
NR_038865	C19orf29-AS1	CACTIN-AS1	CACTIN antisense RNA 1	19p13.3	-0.0596118	-2.40772	1	1
NM_033520	C19orf33	C19orf33	chromosome 19 open reading frame 33	19q13.2	-0.373672	6.60416	0.372636	0.90442
NM_198532	C19orf35	PEAK3	PEAK family member 3	19p13.3	-0.917307	-2.46344	0.484513	0.967235
NM_001136482	C19orf38	C19orf38	chromosome 19 open reading frame 38	19p13.2	-2.70418	-2.91921	0.51014	0.967235
NM_152266	C19orf40	FAAP24	Fanconi anemia core complex associated protein 24	19q13.11	-0.346531	1.47177	0.453361	0.956995
NM_024104	C19orf42	SMIM7	small integral membrane protein 7	19p13.11	-0.327596	5.38148	0.436259	0.947722
NM_024038	C19orf43	TRIR	telomerase RNA component interacting RNase	19p13.13	-0.330974	7.06065	0.429237	0.942276
NM_032207	C19orf44	C19orf44	chromosome 19 open reading frame 44	19p13.11	-0.453834	3.36455	0.291859	0.82717
NM_198534	C19orf45	TEX45	testis expressed 45	19p13.2	2.05027	-3.01307	1	1
NM_001039876	C19orf46	SYNE4	spectrin repeat containing nuclear envelope family member 4	19q13.12	-0.831686	0.18785	0.108231	0.518178
NR_046202	C19orf47	C19orf47	chromosome 19 open reading frame 47	19q13.2	-0.299959	4.31089	0.479465	0.967235
NM_199249	C19orf48	C19orf48	chromosome 19 open reading frame 48	19q13.33	0.402794	6.71294	0.336558	0.871922
NM_001256716	C19orf51	DNAAF3	dynein axonemal assembly factor 3	19q13.42	-0.967795	1.53374	0.0352132	0.254882
NM_138358	C19orf52	TIMM29	translocase of inner mitochondrial membrane 29	19p13.2	-0.512439	3.81046	0.228346	0.760529
NM_014047	C19orf53	C19orf53	chromosome 19 open reading frame 53	19p13.13	-0.194691	5.83135	0.642819	1
NM_198476	C19orf54	C19orf54	chromosome 19 open reading frame 54	19q13.2	0.108032	4.43985	0.800311	1
NM_001039887	C19orf55	PROSER3	proline and serine rich 3	19q13.12	-0.222726	4.65493	0.598747	1
NM_024323	C19orf57	C19orf57	chromosome 19 open reading frame 57	19p13.12	-0.502064	0.641846	0.302976	0.843506
NM_174918	C19orf59	MCEMP1	mast cell expressed membrane protein 1	19p13.2	2.16304	-2.48702	0.15157	0.618163
NM_033420	C19orf6	TMEM259	transmembrane protein 259	19p13.3	-0.20652	7.96206	0.621302	1
NM_001100418	C19orf60	REX1BD	required for excision 1-B domain containing	19p13.11	-0.827249	4.68319	0.0512025	0.328702
NM_175063	C19orf63	EMC10	ER membrane protein complex subunit 10	19q13.33	-0.266202	6.69928	0.525097	0.977681
NM_018381	C19orf66	C19orf66	chromosome 19 open reading frame 66	19p13.2	-1.0071	5.31888	0.0175447	0.152922
NM_001130514	C19orf69	ERICH4	glutamate rich 4	19q13.2	-0.042827	-2.92571	1	1
NM_205767	C19orf70	C19orf70	chromosome 19 open reading frame 70	19p13.3	-0.407326	5.38417	0.333082	0.867868
NM_001135580	C19orf71	C19orf71	chromosome 19 open reading frame 71	19p13.3	-1.24958	0.844436	0.0106369	0.104676
NM_018111	C19orf73	C19orf73	chromosome 19 open reading frame 73	19q13.33	-0.110381	-0.460487	0.872039	1
NM_001101340	C19orf76	ADM5	adrenomedullin 5 (putative)	19q13.33	0.846954	2.18742	0.0576146	0.353638
NR_003676	LOC653786	LOC653786			-5.13377	-2.11564	0.000888522	0.0142685
NR_033242	C19orf79	PET100	PET100 homolog	19p13.2	-0.0344142	4.342	0.937763	1
NM_018687	C19orf80	ANGPTL8	angiopoietin like 8	19p13.2	0.741773	-2.8268	1	1
NM_001195076	C19orf81	C19orf81	chromosome 19 open reading frame 81	19q13.33	1.04163	-1.93344	0.278062	0.808381
NM_173177	C1D	C1D	C1D nuclear receptor corepressor	2p14	0.281597	3.4312	0.512709	0.967964
NM_020156	C1GALT1	C1GALT1	core 1 synthase, glycoprotein-N-acetylgalactosamine 3-beta-galactosyltransferase 1	7p22.1-p21.3	-0.226497	5.36549	0.590383	1
NM_001011551	C1GALT1C1	C1GALT1C1	C1GALT1 specific chaperone 1	Xq24	-0.283292	5.22821	0.500806	0.967235
NM_001130957	C1orf101	CATSPERE	catsper channel auxiliary subunit epsilon	1q44	-0.458608	-0.015778	0.396706	0.91818
NM_018265	C1orf106	INAVA	innate immunity activator	1q32.1	0.413849	6.8468	0.323319	0.862969
NM_017850	C1orf109	C1orf109	chromosome 1 open reading frame 109	1p34.3	-0.0983976	3.94594	0.820174	1
NM_178550	C1orf110	CCDC190	coiled-coil domain containing 190	1q23.3	0.482547	-2.65616	1	1
NM_018186	C1orf112	C1orf112	chromosome 1 open reading frame 112	1q24.2	-0.282142	4.42588	0.505733	0.967235
NM_175710	CR1L	CR1L	complement C3b/C4b receptor 1 like	1q32.2	-5.1273	-2.11797	0.000888522	0.0142685
NM_024709	C1orf115	C1orf115	chromosome 1 open reading frame 115	1q41	1.01095	1.27411	0.0316721	0.236132
NM_001083924	C1orf116	C1orf116	chromosome 1 open reading frame 116	1q32.1	-0.493182	6.29341	0.239919	0.77822
NM_001142726	C1orf122	C1orf122	chromosome 1 open reading frame 122	1p34.3	-0.467321	4.89105	0.268235	0.798438
NM_017887	C1orf123	C1orf123	chromosome 1 open reading frame 123	1p32.3	0.247971	4.97433	0.556522	0.991889
NM_001010984	C1orf124	SPRTN	SprT-like N-terminal domain	1q42.2	-0.0581218	3.60427	0.894201	1
NR_027136	C1orf126	TMEM51-AS1	TMEM51 antisense RNA 1	1p36.21	0.576464	2.00521	0.201186	0.718179
NM_001010980	C1orf130	NCMAP	non-compact myelin associated protein	1p36.11	1.85535	-3.03501	1	1
NM_152379	C1orf131	C1orf131	chromosome 1 open reading frame 131	1q42.2	0.070767	3.37716	0.876438	1
NR_024337	C1orf133	SERTAD4-AS1	SERTAD4 antisense RNA 1	1q32.2	0.125627	3.21483	0.770257	1
NM_024037	C1orf135	AUNIP	aurora kinase A and ninein interacting protein	1p36.11	-0.168004	3.18647	0.696524	1
NR_024236	C1orf140	C1orf140			0.61657	-2.97895	1	1
NM_001013674	C1orf141	C1orf141	chromosome 1 open reading frame 141	1p31.3	0.898767	-3.111	1	1
NM_001114600	C1orf144	SZRD1	SUZ RNA binding domain containing 1	1p36.13	0.497247	7.84462	0.23507	0.773547
NM_001204088	C1orf151-NBL1	MINOS1-NBL1	MINOS1-NBL1 readthrough	1p36.13	-0.400172	6.89882	0.339518	0.875524
NM_017891	C1orf159	C1orf159	chromosome 1 open reading frame 159	1p36.33	0.0417619	4.59193	0.92305	1
NM_174896	C1orf162	C1orf162	chromosome 1 open reading frame 162	1p13.2	-0.188848	-1.59675	1	1
NM_001004303	C1orf168	FYB2	FYN binding protein 2	1p32.2	-2.70418	-2.91921	0.51014	0.967235
NR_027693	C1orf170	PERM1	PPARGC1 and ESRR induced regulator, muscle 1	1p36.33	-1.89861	-3.03235	1	1
NM_152365	C1orf172	KDF1	keratinocyte differentiation factor 1	1p36.11	1.49821	-1.33418	0.0270673	0.211637
NM_001002912	C1orf173	ERICH3	glutamate rich 3	1p31.1	-1.69977	-1.85639	0.0644368	0.379583
NM_207356	C1orf174	C1orf174	chromosome 1 open reading frame 174	1p36.32	0.0240895	4.87542	0.956281	1
NR_027379	C1orf180	LINC01555	long intergenic non-protein coding RNA 1555	1p22.3	-3.2717	-2.05985	0.00543927	0.0620097
NM_144627	C1orf182	TSACC	TSSK6 activating cochaperone	1q22	-1.56655	-1.91675	0.124668	0.564603
NM_001007544	C1orf186	RHEX	regulator of hemoglobinization and erythroid cell expansion	1q32.1	0.376555	1.75093	0.40717	0.922677
NM_198545	C1orf187	DRAXIN	dorsal inhibitory axon guidance protein	1p36.22	-1.88266	-3.03879	1	1
NM_001010979	C1orf189	C1orf189	chromosome 1 open reading frame 189	1q21.3	-1.90344	-3.0303	1	1
NM_001013625	C1orf192	CFAP126	cilia and flagella associated protein 126	1q23.3	-1.90344	-3.0303	1	1
NM_032800	C1orf198	C1orf198	chromosome 1 open reading frame 198	1q42.2	0.180528	4.93932	0.669325	1
NM_001199012	C1orf201	STPG1	sperm tail PG-rich repeat containing 1	1p36.11	-1.04561	3.79828	0.0149864	0.135512
NM_001134233	C1orf204	SNHG28	small nucleolar RNA host gene 28	1q23.2	-0.222033	1.36146	0.642273	1
NM_030806	C1orf21	C1orf21	chromosome 1 open reading frame 21	1q25.3	0.274326	3.96026	0.52006	0.972984
NM_001164829	C1orf210	C1orf210	chromosome 1 open reading frame 210	1p34.2	-3.21637	-2.81763	0.265211	0.794151
NM_001164824	C1orf212	SMIM12	small integral membrane protein 12	1p34.3	-0.0900863	5.71527	0.830724	1
NR_033690	C1orf213	ZNF436-AS1	ZNF436 antisense RNA 1	1p36.12	0.237558	2.19921	0.587269	1
NM_152374	C1orf216	C1orf216	chromosome 1 open reading frame 216	1p34.3	-0.221576	4.52652	0.601294	1
NR_033186	C1orf220	C1orf220	chromosome 1 open reading frame 220 (putative)	1q25.2	-0.0339052	-0.0424822	1	1
NM_001135240	C1orf226	C1orf226	chromosome 1 open reading frame 226	1q23.3	-1.1793	2.74497	0.00733922	0.0789612
NM_001024601	C1orf227	SPATA45	spermatogenesis associated 45	1q32.3	0.742195	-2.82663	1	1
NM_001145636	C1orf228	ARMH1	armadillo-like helical domain containing 1	1p34.1	-0.90757	-0.964845	0.181011	0.680873
NM_207401	C1orf229	C1orf229	chromosome 1 open reading frame 229	1q44	-0.333703	-1.50664	0.747083	1
NM_001242659	C1orf233	FNDC10	fibronectin type III domain containing 10	1p36.33	-0.923768	2.73552	0.035228	0.254882
NM_001164246	C1orf27	ODR4	odr-4 GPCR localization factor homolog	1q31.1	-0.241095	4.8044	0.568267	1
NM_001206641	C1orf31	COA6	cytochrome c oxidase assembly factor 6	1q42.2	-0.795531	4.13051	0.0617813	0.371227
NM_024319	C1orf35	C1orf35	chromosome 1 open reading frame 35	1q42.13	-0.377894	4.6307	0.371334	0.903495
NM_001039477	C1orf38	THEMIS2	thymocyte selection associated family member 2	1p35.3	-0.35523	2.64177	0.421147	0.935952
NM_015449	C1orf43	C1orf43	chromosome 1 open reading frame 43	1q21.3	-0.113905	7.05019	0.78566	1
NM_032126	C1orf49	TEX35	testis expressed 35	1q25.2	-1.90344	-3.0303	1	1
NM_024097	C1orf50	C1orf50	chromosome 1 open reading frame 50	1p34.2	-0.20147	2.84099	0.64049	1
NM_144697	C1orf51	CIART	circadian associated repressor of transcription	1q21.2	1.19815	3.24611	0.00589384	0.0662309
NM_198077	C1orf52	C1orf52	chromosome 1 open reading frame 52	1p22.3	0.489493	4.81903	0.246064	0.784078
NM_001024594	C1orf53	C1orf53	chromosome 1 open reading frame 53	1q31.3	-0.797075	1.19283	0.0905727	0.465939
NM_052892	PKD1L2	PKD1L2	polycystin 1 like 2 (gene/pseudogene)	16q23.2	-5.1219	1.13294	8.11477e-16	1.2584e-13
NM_152608	C1orf55	SDE2	SDE2 telomere maintenance homolog	1q42.12	0.138155	4.81711	0.744349	1
NM_017860	C1orf56	C1orf56	chromosome 1 open reading frame 56	1q21.3	-1.16062	1.83297	0.0106705	0.104895
NM_006365	C1orf61	C1orf61	chromosome 1 open reading frame 61	1q22	-1.88266	-3.03879	1	1
NM_020317	C1orf63	RSRP1	arginine and serine rich protein 1	1p36.11	0.16045	5.55577	0.703066	1
NM_178840	C1orf64	SRARP	steroid receptor associated and regulated protein	1p36.13	-1.90344	-3.0303	1	1
NM_152485	C1orf74	C1orf74	chromosome 1 open reading frame 74	1q32.2	0.223492	2.2643	0.613289	1
NM_152759	LRRC43	LRRC43	leucine rich repeat containing 43	12q24.31	-5.11007	-2.12739	0.000888522	0.0142685
NM_001146310	C1orf86	FAAP20	Fanconi anemia core complex associated protein 20	1p36.33	0.1062	5.37305	0.801236	1
NM_001040147	SERPINB7	SERPINB7	serpin family B member 7	18q21.33	-5.07946	5.23853	1.0453e-23	4.86299e-21
NM_014283	C1orf9	SUCO	SUN domain containing ossification factor	1q24.3	0.229294	5.91393	0.584933	1
NM_032884	C1orf94	C1orf94	chromosome 1 open reading frame 94	1p35.1	-0.838981	-2.82404	1	1
NM_015011	MYO16	MYO16	myosin XVI	13q33.3	-5.07045	-2.14726	0.00148213	0.0216321
NM_145257	C1orf96	CCSAP	centriole, cilia and spindle associated protein	1q42.13	0.164924	4.09663	0.698621	1
NR_040064	C1orf98	LINC00862	long intergenic non-protein coding RNA 862	1q32.1	-0.0476572	-2.92368	1	1
NM_001212	C1QBP	C1QBP	complement C1q binding protein	17p13.2	-0.48163	6.67649	0.250814	0.790673
NM_006688	C1QL1	C1QL1	complement C1q like 1	17q21.31	0.973214	3.9075	0.0231271	0.186389
NM_001008223	C1QL4	C1QL4	complement C1q like 4	12q13.12	0.978831	-1.03563	0.150103	0.618163
NM_198594	C1QTNF1	C1QTNF1	C1q and TNF related 1	17q25.3	0.78018	2.32387	0.0798976	0.429846
NM_031908	C1QTNF2	C1QTNF2	C1q and TNF related 2	5q33.3	-1.38938	-1.26142	0.0557947	0.347601
NM_030945	C1QTNF3	C1QTNF3	C1q and TNF related 3	5p13.2	0.465008	1.20469	0.313176	0.854907
NR_037951	C1QTNF3-AMACR	C1QTNF3-AMACR	C1QTNF3-AMACR readthrough (NMD candidate)	5p13.2	-0.692185	4.31692	0.103356	0.503903
NM_031909	C1QTNF4	C1QTNF4	C1q and TNF related 4	11p11.2	-1.89861	-3.03235	1	1
NM_015645	C1QTNF5	C1QTNF5	C1q and TNF related 5	11q23.3	-1.88266	-3.03879	1	1
NM_182486	C1QTNF6	C1QTNF6	C1q and TNF related 6	22q12.3	-0.416444	4.90923	0.323743	0.862969
NM_001135170	C1QTNF7	C1QTNF7	C1q and TNF related 7	4p15.32	-4.13695	-2.55271	0.0413159	0.282353
NM_207419	C1QTNF8	C1QTNF8	C1q and TNF related 8	16p13.3	-1.89861	-3.03235	1	1
NM_178540	C1QTNF9	C1QTNF9	C1q and TNF related 9	13q12.12	3.34698	-2.78113	0.265211	0.794151
NM_001007537	C1QTNF9B	C1QTNF9B	C1q and TNF related 9B	13q12.12	1.20754	-3.09138	1	1
NM_198501	SMTNL2	SMTNL2	smoothelin like 2	17p13.2	-5.05861	-0.237326	1.51155e-10	1.17117e-08
NR_002710	ALOX12P2	ALOX12P2	arachidonate 12-lipoxygenase pseudogene 2	17p13.1	-5.0274	-2.17023	0.00148213	0.0216321
NM_016546	C1RL	C1RL	complement C1r subcomponent like	12p13.31	-0.161588	5.25882	0.701334	1
NM_005532	IFI27	IFI27	interferon alpha inducible protein 27	14q32.12	-5.02096	2.98747	8.80332e-21	2.64227e-18
NM_000829	GRIA4	GRIA4	glutamate ionotropic receptor AMPA type subunit 4	11q22.3	-5.00863	-2.17943	0.00148213	0.0216321
NM_017896	C20orf11	GID8	GID complex subunit 8 homolog	20q13.33	0.315203	5.74309	0.452914	0.956747
NM_016470	C20orf111	OSER1	oxidative stress responsive serine rich 1	20q13.12	-0.332466	5.66352	0.428929	0.942153
NM_001256798	C20orf112	NOL4L	nucleolar protein 4 like	20q11.21	-0.223178	4.39327	0.599018	1
NM_080628	C20orf118	TLDC2	TBC/LysM-associated domain containing 2	20q11.23	-2.69477	-2.92327	0.51014	0.967235
NM_152503	C20orf132	MROH8	maestro heat like repeat family member 8	20q11.23	-0.0805561	-0.0752652	0.900473	1
NM_001256538	C20orf141	C20orf141	chromosome 20 open reading frame 141	20p13	-4.9937	-2.18675	0.00148213	0.0216321
NM_001207076	C20orf152	CNBD2	cyclic nucleotide binding domain containing 2	20q11.23	0.232454	-2.3353	1	1
NM_003771	KRT36	KRT36	keratin 36	17q21.2	-4.99001	-2.18856	0.00148213	0.0216321
NR_033263	C20orf166-AS1	MIR1-1HG-AS1	MIR1-1HG antisense RNA 1	20q13.33	-2.70418	-2.91921	0.51014	0.967235
NM_001009984	C20orf194	C20orf194	chromosome 20 open reading frame 194	20p13	-0.310944	4.99668	0.461257	0.962487
NM_024059	C20orf195	FNDC11	fibronectin type III domain containing 11	20q13.33	0.175372	-1.29663	0.780594	1
NM_152504	C20orf196	C20orf196	chromosome 20 open reading frame 196	20p12.3	-0.275444	0.203691	0.6369	1
NM_173644	C20orf197	C20orf197	chromosome 20 open reading frame 197	20q13.33	-0.329666	-1.09698	0.717329	1
NM_018270	C20orf20	MRGBP	MRG domain binding protein	20q13.33	0.155936	5.2038	0.711244	1
NM_001007125	C20orf201	LKAAEAR1	LKAAEAR motif containing 1	20q13.33	-0.326176	-2.19685	1	1
NM_001009612	C20orf202	C20orf202	chromosome 20 open reading frame 202	20p13	-0.0382088	-2.73736	1	1
NM_182584	C20orf203	C20orf203	chromosome 20 open reading frame 203	20q11.21	0.306092	-2.78443	1	1
NM_001199534	C20orf24	RAB5IF	RAB5 interacting factor	20q11.23	-0.537968	6.17818	0.200297	0.715968
NM_015585	C20orf26	CFAP61	cilia and flagella associated protein 61	20p11.23	-2.68972	-1.90315	0.00812155	0.0847639
NM_001039140	C20orf27	C20orf27	chromosome 20 open reading frame 27	20p13	-0.361874	5.5698	0.389588	0.9165
NM_001204447	C20orf29	AP5S1	adaptor related protein complex 5 sigma 1 subunit	20p13	-0.149169	3.94581	0.729858	1
NM_020531	C20orf3	APMAP	adipocyte plasma membrane associated protein	20p11.21	-0.0337597	7.49272	0.935978	1
NM_001009925	C20orf30	TMEM230	transmembrane protein 230	20p13-p12.3	-0.38176	6.28715	0.362847	0.897066
NM_015511	C20orf4	AAR2	AAR2 splicing factor homolog	20q11.23	0.133614	5.4847	0.750893	1
NM_016407	C20orf43	RTF2	replication termination factor 2	20q13.31	-0.132391	6.40356	0.752405	1
NM_033409	C20orf54	SLC52A3	solute carrier family 52 member 3	20p13	-1.89861	-3.03235	1	1
NR_029377	C20orf7	NDUFAF5	NADH:ubiquinone oxidoreductase complex assembly factor 5	20p12.1	-0.682677	3.36199	0.111591	0.527187
NM_052865	C20orf72	MGME1	mitochondrial genome maintenance exonuclease 1	20p11.23	-0.184477	5.34565	0.661582	1
NM_001009608	C20orf94	SLX4IP	SLX4 interacting protein	20p12.2	-0.728863	0.420168	0.15471	0.625549
NM_153269	C20orf96	C20orf96	chromosome 20 open reading frame 96	20p13	-0.820935	3.93489	0.0550153	0.344359
NR_026845	C21orf119	URB1-AS1	URB1 antisense RNA 1 (head to head)	21q22.11	-0.465381	1.56908	0.306378	0.848042
NR_026755	C21orf15	CYP4F29P	cytochrome P450 family 4 subfamily F member 29, pseudogene	21q11.2	-0.674402	1.32608	0.150485	0.618163
NM_004928	C21orf2	C21orf2	chromosome 21 open reading frame 2	21q22.3	-0.222998	4.08858	0.601003	1
NM_004649	C21orf33	C21orf33	chromosome 21 open reading frame 33	21q22.3	-0.363151	5.6723	0.38742	0.916188
NR_024623	C21orf49	C21orf62-AS1	C21orf62 antisense RNA 1	21q22.11	-0.00798076	-2.16677	1	1
NM_032261	C21orf56	SPATC1L	spermatogenesis and centriole associated 1 like	21q22.3	-0.757638	3.41637	0.0786793	0.425129
NM_058180	C21orf58	C21orf58	chromosome 21 open reading frame 58	21q22.3	0.0840278	5.38109	0.842704	1
NR_036552	C21orf59	CFAP298	cilia and flagella associated protein 298	21q22.11	-1.19137	5.66417	0.00506958	0.0585691
NM_001162496	C21orf62	C21orf62	chromosome 21 open reading frame 62	21q22.11	-4.12376	-2.55865	0.0413159	0.282353
NM_058187	C21orf63	EVA1C	eva-1 homolog C	21q22.11	-1.01013	1.11482	0.0318564	0.237126
NR_027128	C21orf67	LINC01547	long intergenic non-protein coding RNA 1547	21q22.3	-0.644909	1.23758	0.16574	0.649318
NM_020152	C21orf7	MAP3K7CL	MAP3K7 C-terminal like	21q21.3	0.172742	1.92018	0.698891	1
NR_026542	C21orf88	B3GALT5-AS1	B3GALT5 antisense RNA 1	21q22.2	0.869385	1.09618	0.061091	0.369225
NR_026548	C21orf90	TSPEAR-AS2	TSPEAR antisense RNA 2	21q22.3	-3.20156	-2.82387	0.265211	0.794151
NM_017447	C21orf91	C21orf91	chromosome 21 open reading frame 91	21q21.1	-0.239748	3.99457	0.573733	1
NR_038871	C21orf91-OT1	C21orf91-OT1	C21orf91 overlapping transcript 1	21q21.1	0.322135	-1.60903	0.733225	1
NM_031444	C22orf13	GUCD1	guanylyl cyclase domain containing 1	22q11.23	-0.442585	6.95572	0.290892	0.82632
NM_182520	C22orf15	C22orf15	chromosome 22 open reading frame 15	22q11.23	-0.0414004	-2.73478	1	1
NM_032561	C22orf23	C22orf23	chromosome 22 open reading frame 23	22q13.1	-0.404587	-1.6118	0.733225	1
NM_015372	C22orf24	C22orf24	chromosome 22 open reading frame 24	22q12.3	1.12667	-1.73653	0.185438	0.690556
NM_152906	C22orf25	TANGO2	transport and golgi organization 2 homolog	22q11.21	-0.445336	4.37801	0.293399	0.829561
NM_018280	C22orf26	PRR34	proline rich 34	22q13.31	0.416835	-0.599076	0.537007	0.984767
NM_014306	C22orf28	RTCB	RNA 2',3'-cyclic phosphate and 5'-OH ligase	22q12.3	0.173444	6.57705	0.678895	1
NM_024627	C22orf29	RTL10	retrotransposon Gag like 10	22q11.21	0.382549	5.75386	0.362371	0.896669
NM_033318	C22orf32	SMDT1	single-pass membrane protein with aspartate rich tail 1	22q13.2	-0.00631155	4.53258	0.990402	1
NR_026997	C22orf34	C22orf34	chromosome 22 open reading frame 34	22q13.33	-0.926366	-3.1095	1	1
NM_001166242	C22orf39	C22orf39	chromosome 22 open reading frame 39	22q11.21	0.0745334	4.47068	0.861715	1
NM_207327	C22orf40	CDPF1	cysteine rich DPF motif domain containing 1	22q13.31	-0.2675	2.89	0.542767	0.986337
NM_001010859	C22orf42	C22orf42	chromosome 22 open reading frame 42	22q12.3	1.85535	-3.03501	1	1
NM_001018058	TFEC	TFEC	transcription factor EC	7q31.2	-4.98994	-2.18861	0.00148213	0.0216321
NM_001142964	C22orf46	C22orf46	chromosome 22 open reading frame 46	22q13.2	-0.032922	4.55726	0.939381	1
NM_199050	C2CD2	C2CD2	C2 calcium dependent domain containing 2	21q22.3	-0.19365	4.5459	0.647942	1
NM_014807	C2CD2L	C2CD2L	C2CD2 like	11q23.3	-0.338862	4.2434	0.424886	0.938307
NM_015531	C2CD3	C2CD3	C2 calcium dependent domain containing 3	11q13.4	-0.0594069	4.24309	0.890885	1
NM_021232	PRODH2	PRODH2	proline dehydrogenase 2	19q13.12	-4.98629	-2.19038	0.00148213	0.0216321
NM_001007595	C2CD4B	C2CD4B	C2 calcium dependent domain containing 4B	15q22.2	-3.74438	-2.68112	0.0755461	0.414611
NR_027419	AVPR2	AVPR2	arginine vasopressin receptor 2	Xq28	-4.96767	-2.19956	0.00250049	0.0335484
NM_001136003	C2CD4D	C2CD4D	C2 calcium dependent domain containing 4D	1q21.3	0.892956	-2.15372	0.440693	0.948514
NM_144706	C2orf15	C2orf15	chromosome 2 open reading frame 15	2q11.2	-0.537839	0.0876774	0.308189	0.849402
NM_032266	C2orf16	C2orf16	chromosome 2 open reading frame 16	2p23.3	-2.67203	-2.33068	0.0572657	0.3524
NM_017877	C2orf18	SLC35F6	solute carrier family 35 member F6	2p23.3	-1.00702	5.91091	0.017328	0.151745
NM_024642	GALNT12	GALNT12	polypeptide N-acetylgalactosaminyltransferase 12	9q22.33	-4.96218	5.29539	5.79803e-23	2.45217e-20
[truncated: 16,610 more rows]

## Sheet: Proteomic_FC_PValues
MaxQuant.pgID	Protein.IDs	First.accession	Gene.names	Manual.gene	Gene.Symbol.HGNC27Feb2018	Protein.Name.HGNC27Feb2018	Chrom.Loc.HGNC27Feb2018	Raw.count_FLCNneg_5C3.Repl1	Raw.count_FLCNneg_5C3.Repl2	Raw.count_FLCNneg_5C8.Repl1	Raw.count_FLCNneg_5C8.Repl2	Raw.count_FLCNneg_7C2.Repl1	Raw.count_FLCNneg_7C2.Repl2	Raw.count_FLCNpos_wt.Repl1	Raw.count_FLCNpos_wt.Repl2	Raw.count_FLCNpos_Cas9.Repl1	Raw.count_FLCNpos_Cas9.Repl2	Raw.count_FLCNpos_TP53neg.Repl1	Raw.count_FLCNpos_TP53neg.Repl2	Normalised.count_FLCNneg_5C3.Repl1	Normalised.count_FLCNneg_5C3.Repl2	Normalised.count_FLCNneg_5C8.Repl1	Normalised.count_FLCNneg_5C8.Repl2	Normalised.count_FLCNneg_7C2.Repl1	Normalised.count_FLCNneg_7C2.Repl2	Normalised.count_FLCNpos_wt.Repl1	Normalised.count_FLCNpos_wt.Repl2	Normalised.count_FLCNpos_Cas9.Repl1	Normalised.count_FLCNpos_Cas9.Repl2	Normalised.count_FLCNpos_TP53neg.Repl1	Normalised.count_FLCNpos_TP53neg.Repl2	Fold.change.neg_pos	Fold.change.pos_neg	P-value	Corrected.p-value.BH
1562	P35579;P35579-2;REV__Q9UKV3-5;REV__Q9UKV3;P13535;Q9UKX3;Q9Y623;Q9UKX2	P35579	MYH9;MYH8;MYH13;MYH4;MYH2	MYH9	MYH9	myosin heavy chain 9	22q12.3	1285	1239	1124	1113	843	875	780	686	1234	1293	1262	1202	1214.37	1166.21	1009.99	1004.04	813.052	846.723	939.454	844.16	1237.29	1355.52	1276.58	1195.92	1.13124	-1.13124	0.205517	0.535412
1267	P20591;P20591-2;P20592-2	P20591	MX1;MX2	MX1	MX1	MX dynamin like GTPase 1	21q22.3	3	5	34	34	84	75	0	0	0	0	0	0	2.8351	4.70624	30.5513	30.6716	81.0158	72.5763	0	0	0	0	0	0	-10000	10000	2.10586e-05	0.00402083
1013	P09914;P09914-2	P09914	IFIT1	IFIT1	IFIT1	interferon induced protein with tetratricopeptide repeats 1	10q23.31	2	2	24	24	24	29	0	0	0	0	0	0	1.89007	1.88249	21.5656	21.6505	23.1474	28.0628	0	0	0	0	0	0	-10000	10000	2.78098e-05	0.00457239
2048	P60709	P60709	ACTB	ACTB	ACTB	actin beta	7p22.1	771	838	788	797	671	704	500	513	752	781	821	930	728.621	788.765	708.072	718.979	647.162	681.249	602.214	631.274	754.007	818.762	830.485	925.299	1.06768	-1.06768	0.391265	0.690076
1733	P47895	P47895	ALDH1A3	ALDH1A3	ALDH1A3	aldehyde dehydrogenase 1 family member A3	15q26.3	5	8	29	29	0	0	0	0	0	0	0	0	4.72517	7.52998	26.0585	26.1611	0	0	0	0	0	0	0	0	-10000	10000	0.00307003	0.0538666
2823	Q15274	Q15274	QPRT	QPRT	QPRT	quinolinate phosphoribosyltransferase	16p11.2	9	7	2	3	17	18	0	0	0	0	0	0	8.5053	6.58873	1.79714	2.70632	16.3961	17.4183	0	0	0	0	0	0	-10000	10000	1.94762e-05	0.00384266
963	P08473	P08473	MME	MME	MME	membrane metalloendopeptidase	3q25.2	4	4	10	13	13	10	0	0	0	0	0	0	3.78013	3.76499	8.98568	11.7274	12.5382	9.67684	0	0	0	0	0	0	-10000	10000	8.82085e-07	0.000718483
958	P08238;Q58FF7	P08238	HSP90AB1;HSP90AB3P	HSP90AB1	HSP90AB1	heat shock protein 90 alpha family class B member 1	6p21.1	376	421	337	353	404	394	313	331	419	372	378	356	355.333	396.265	302.817	318.443	389.647	381.267	376.986	407.313	420.118	389.987	382.367	354.201	1.08732	-1.08732	0.085496	0.335948
4705	Q9BY89;Q9BY89-2	Q9BY89	KIAA1671	KIAA1671	KIAA1671	KIAA1671	22q11.23	6	3	12	10	4	7	0	0	0	0	0	0	5.6702	2.82374	10.7828	9.02106	3.8579	6.77379	0	0	0	0	0	0	-10000	10000	1.26859e-06	0.000750878
834	P02511	P02511	CRYAB	CRYAB	CRYAB	crystallin alpha B	11q23.1	1	4	11	9	0	5	0	0	0	0	0	0	0.945033	3.76499	9.88425	8.11896	0	4.83842	0	0	0	0	0	0	-10000	10000	0.000488024	0.0202001
4393	Q96RQ9;Q96RQ9-2	Q96RQ9	IL4I1	IL4I1	IL4I1	interleukin 4 induced 1	19q13.33	2	2	10	9	4	2	0	0	0	0	0	0	1.89007	1.88249	8.98568	8.11896	3.8579	1.93537	0	0	0	0	0	0	-10000	10000	3.8005e-05	0.005356
2311	Q01484-5;Q01484-2;Q01484;Q01484-7;P16157-2;P16157-11;P16157-9;P16157-6;P16157-7;P16157-4;P16157-13;P16157-10;P16157-15;P16157-8;P16157-5;P16157-16;P16157-3;P16157;P16157-21;P16157-12;P16157-14	Q01484-5	ANK2;ANK1	ANK2	ANK2	ankyrin 2	4q25-q26	5	2	4	4	6	7	0	0	0	0	0	0	4.72517	1.88249	3.59427	3.60842	5.78684	6.77379	0	0	0	0	0	0	-10000	10000	1.63304e-06	0.000795959
970	P08582;P08582-2	P08582	MELTF	MELTF	MELTF	melanotransferrin	3q29	0	1	7	13	0	0	0	0	0	0	0	0	0	0.941247	6.28998	11.7274	0	0	0	0	0	0	0	0	-10000	10000	0.022373	0.17167
1448	P29728-2;P29728;P29728-3	P29728-2	OAS2	OAS2	OAS2	2'-5'-oligoadenylate synthetase 2	12q24.13	0	0	1	2	9	9	0	0	0	0	0	0	0	0	0.898568	1.80421	8.68027	8.70915	0	0	0	0	0	0	-10000	10000	0.00581665	0.0806293
2681	Q14204	Q14204	DYNC1H1	DYNC1H1	DYNC1H1	dynein cytoplasmic 1 heavy chain 1	14q32.31	315	293	282	297	243	248	248	233	236	247	270	248	297.686	275.785	253.396	267.926	234.367	239.986	298.698	286.719	236.63	258.943	273.119	246.746	1.02021	-1.02021	0.730329	0.908238
862	P04406;P04406-2;O14556	P04406	GAPDH;GAPDHS	GAPDH	GAPDH	glyceraldehyde-3-phosphate dehydrogenase	12p13.31	272	276	215	216	315	330	254	215	243	259	246	265	257.049	259.784	193.192	194.855	303.809	319.336	305.925	264.569	243.648	271.523	248.842	263.661	1.0459	-1.0459	0.49531	0.77042
5324	Q9NZM1-6;Q9NZM1;Q9NZM1-3;Q9NZM1-2;Q9NZM1-5;Q9NZM1-7;Q9NZM1-8;Q9NZM1-4;REV__P24752	Q9NZM1-6	MYOF	MYOF	MYOF	myoferlin	10q23.33	307	291	287	288	230	239	324	287	182	190	194	185	290.125	273.903	257.889	259.807	221.829	231.276	390.235	353.169	182.486	199.187	196.241	184.065	-1.01956	1.01956	0.628746	0.849086
1101	P13639	P13639	EEF2	EEF2	EEF2	eukaryotic translation elongation factor 2	19p13.3	237	245	275	279	247	241	194	201	255	234	234	214	223.973	230.606	247.106	251.688	238.225	233.212	233.659	247.341	255.681	245.314	236.703	212.918	1.00478	-1.00478	0.937589	0.973954
2291	Q00610-2;Q00610;P53675-2;P53675	Q00610-2	CLTC;CLTCL1	CLTC	CLTC	clathrin heavy chain	17q23.1	288	260	261	266	245	244	197	220	214	223	200	196	272.17	244.724	234.526	239.96	236.296	236.115	237.272	270.722	214.571	233.782	202.311	195.009	-1.08135	1.08135	0.0947745	0.355494
3855	Q8TCB0;Q8TCB0-2	Q8TCB0	IFI44	IFI44	IFI44	interferon induced protein 44	1p31.1	0	0	3	3	6	9	0	0	0	0	0	0	0	0	2.6957	2.70632	5.78684	8.70915	0	0	0	0	0	0	-10000	10000	0.00306878	0.0538666
2629	Q13813	Q13813	SPTAN1	SPTAN1	SPTAN1	spectrin alpha, non-erythrocytic 1	9q34.11	262	273	198	202	242	239	198	151	259	251	261	234	247.599	256.961	177.917	182.225	233.403	231.276	238.477	185.814	259.691	263.136	264.015	232.817	1.08618	-1.08618	0.252463	0.574633
1222	P18206-2;P18206;P18206-3	P18206-2	VCL	VCL	VCL	vinculin	10q22.2	188	240	229	246	214	193	211	254	227	231	187	209	177.666	225.899	205.772	221.918	206.397	186.763	254.134	312.561	227.606	242.169	189.16	207.944	1.17082	-1.17082	0.066625	0.308961
2299	Q01082	Q01082	SPTBN1	SPTBN1	SPTBN1	spectrin beta, non-erythrocytic 1	2p16.2	266	245	182	182	227	239	177	142	232	227	273	228	251.379	230.606	163.539	164.183	218.936	231.276	213.184	174.739	232.619	237.976	276.154	226.848	1.08064	-1.08064	0.344245	0.656753
928	P07355;P07355-2;A6NMY6	P07355	ANXA2;ANXA2P2	ANXA2	ANXA2	annexin A2	15q22.2	236	232	204	206	205	220	224	204	203	208	207	209	223.028	218.369	183.308	185.834	197.717	212.89	269.792	251.033	203.542	218.057	209.392	207.944	1.11351	-1.11351	0.0721414	0.318344
4813	Q9H0Q0	Q9H0Q0	FAM49A	FAM49A	FAM49A	family with sequence similarity 49 member A	2p24.2	2	2	5	4	3	5	0	0	0	0	0	0	1.89007	1.88249	4.49284	3.60842	2.89342	4.83842	0	0	0	0	0	0	-10000	10000	5.2819e-06	0.00164545
835	P02545;P02545-6;P02545-5;P02545-4	P02545	LMNA	LMNA	LMNA	lamin A/C	1q22	251	239	271	232	175	190	181	188	169	168	174	191	237.203	224.958	243.512	209.289	168.783	183.86	218.001	231.344	169.451	176.123	176.01	190.035	-1.09186	1.09186	0.226335	0.550764
1130	P14625;Q58FF3	P14625	HSP90B1;HSP90B2P	HSP90B1	HSP90B1	heat shock protein 90 beta family member 1	12q23.3	190	206	162	168	227	225	173	181	236	200	192	191	179.556	193.897	145.568	151.554	218.936	217.729	208.366	222.73	236.63	209.67	194.218	190.035	1.13945	-1.13945	0.0708822	0.316166
61	CON__P05787;P05787;P05787-2;CON__Q9H552;CON__H-INV:HIT000016045;CON__REFSEQ:XP_092267;CON__Q9NSB2;CON__Q6ISB0;Q9NSB2	CON__P05787	KRT8;KRT84	KRT8	KRT8	keratin 8	12q13.13	214	234	183	164	171	167	228	210	195	178	165	180	202.237	220.252	164.438	147.945	164.925	161.603	274.61	258.416	195.52	186.607	166.906	179.09	1.18819	-1.18819	0.112995	0.384562
1046	P11021	P11021	HSPA5	HSPA5	HSPA5	heat shock protein family A (Hsp70) member 5	9q33.3	187	174	249	195	168	169	163	151	169	184	219	242	176.721	163.777	223.743	175.911	162.032	163.539	196.322	185.814	169.451	192.897	221.53	240.777	1.13237	-1.13237	0.0858783	0.336288
5000	Q9HBH0;Q9HBH0-2	Q9HBH0	RHOF	RHOF	RHOF	ras homolog family member F, filopodia associated	12q24.31	0	2	8	5	2	3	0	0	0	0	0	0	0	1.88249	7.18855	4.51053	1.92895	2.90305	0	0	0	0	0	0	-10000	10000	0.000366024	0.0173934
1727	P46940	P46940	IQGAP1	IQGAP1	IQGAP1	IQ motif containing GTPase activating protein 1	15q26.1	233	208	170	185	182	175	162	186	179	185	186	176	220.193	195.779	152.757	166.89	175.534	169.345	195.117	228.883	179.478	193.945	188.149	175.11	1.07421	-1.07421	0.255125	0.574633
3119	Q5T0D9-2;Q5T0D9	Q5T0D9-2	TPRG1L	TPRG1L	TPRG1L	tumor protein p63 regulated 1 like	1p36.32	2	2	5	5	2	3	0	0	0	0	0	0	1.89007	1.88249	4.49284	4.51053	1.92895	2.90305	0	0	0	0	0	0	-10000	10000	1.11585e-05	0.00264187
64	CON__P08727;CON__P19001;CON__Q99456;Q99456	CON__P08727	KRT12	KRT19	KRT19	keratin 19	17q21.2	230	202	213	209	159	164	153	157	163	139	145	178	217.358	190.132	191.395	188.54	153.351	158.7	184.277	193.197	163.435	145.721	146.675	177.1	-1.08815	1.08815	0.198937	0.528979
939	P07900;P07900-2;Q14568;Q58FG0;Q58FG1	P07900	HSP90AA1;HSP90AA2P;HSP90AA5P;HSP90AA4P	HSP90AA1	HSP90AA1	heat shock protein 90 alpha family class A member 1	14q32.31	170	196	151	161	172	171	130	135	187	162	165	163	160.656	184.484	135.684	145.239	165.89	165.474	156.576	166.125	187.499	169.833	166.906	162.176	1.05399	-1.05399	0.251047	0.574633
1604	P37802;P37802-2	P37802	TAGLN2	TAGLN2	TAGLN2	transgelin 2	1q23.2	185	180	174	205	125	140	109	107	192	167	165	181	174.831	169.425	156.351	184.932	120.559	135.476	131.283	131.669	192.512	175.075	166.906	180.085	1.03819	-1.03819	0.628403	0.849011
5887	Q9Y624;Q9Y624-2	Q9Y624	F11R	F11R	F11R	F11 receptor	1q23.3	3	2	7	4	1	2	0	0	0	0	0	0	2.8351	1.88249	6.28998	3.60842	0.964474	1.93537	0	0	0	0	0	0	-10000	10000	4.59042e-05	0.00574281
817	P00558;P00558-2	P00558	PGK1	PGK1	PGK1	phosphoglycerate kinase 1	Xq21.1	128	116	216	191	147	155	159	152	151	151	150	154	120.964	109.185	194.091	172.302	141.778	149.991	191.504	187.044	151.403	158.301	151.733	153.222	1.11809	-1.11809	0.196947	0.526682
860	P04264;CON__P04264	P04264	KRT1	KRT1	KRT1	keratin 1	12q13.13	126	146	135	141	142	125	290	206	146	140	150	117	119.074	137.422	121.307	127.197	136.955	120.96	349.284	253.494	146.39	146.769	151.733	116.409	1.52583	-1.52583	0.0700841	0.314264
5021	Q9HCE0;Q9HCE0-2	Q9HCE0	EPG5	EPG5	EPG5	ectopic P-granules autophagy protein 5 homolog	18q12.3-q21.1	1	1	6	6	2	2	0	0	0	0	0	0	0.945033	0.941247	5.39141	5.41264	1.92895	1.93537	0	0	0	0	0	0	-10000	10000	0.0001515	0.0112412
2180	P62979;P0CG47;P0CG48	P62979	RPS27A;UBB;UBC	RPS27A	RPS27A	ribosomal protein S27a	2p16.1	153	156	163	156	156	151	123	121	176	146	141	162	144.59	146.835	146.467	140.729	150.458	146.12	148.145	148.897	176.47	153.059	142.629	161.181	1.06305	-1.06305	0.187248	0.512739
852	P04075;P04075-2;P05062	P04075	ALDOA;ALDOB	ALDOA	ALDOA	aldolase, fructose-bisphosphate A	16p11.2	136	135	137	145	166	178	165	142	146	140	146	152	128.525	127.068	123.104	130.805	160.103	172.248	198.731	174.739	146.39	146.769	147.687	151.232	1.14693	-1.14693	0.0753082	0.32457
1012	P09913	P09913	IFIT2	IFIT2	IFIT2	interferon induced protein with tetratricopeptide repeats 2	10q23.31	0	0	2	4	3	7	0	0	0	0	0	0	0	0	1.79714	3.60842	2.89342	6.77379	0	0	0	0	0	0	-10000	10000	0.00321169	0.0549703
2740	Q14764	Q14764	MVP	MVP	MVP	major vault protein	16p11.2	151	164	170	174	152	156	168	161	112	121	107	107	142.7	154.365	152.757	156.966	146.6	150.959	202.344	198.119	112.299	126.851	108.236	106.459	-1.05857	1.05857	0.412824	0.711967
3401	Q7Z3E5-2;Q7Z3E5	Q7Z3E5-2	ARMC9	ARMC9	ARMC9	armadillo repeat containing 9	2q37.1	3	4	3	1	3	2	0	0	0	0	0	0	2.8351	3.76499	2.6957	0.902106	2.89342	1.93537	0	0	0	0	0	0	-10000	10000	2.39278e-05	0.00429177
2319	Q01813;Q01813-2	Q01813	PFKP	PFKP	PFKP	phosphofructokinase, platelet	10p15.2	127	141	126	141	150	160	108	114	142	139	132	138	120.019	132.716	113.22	127.197	144.671	154.829	130.078	140.283	142.379	145.721	133.525	137.302	1.04622	-1.04622	0.342939	0.656062
1777	P49327	P49327	FASN	FASN	FASN	fatty acid synthase	17q25.3	143	141	133	131	129	135	93	81	137	159	163	164	135.14	132.716	119.51	118.176	124.417	130.637	112.012	99.6749	137.366	166.688	164.883	163.171	1.10939	-1.10939	0.235333	0.560539
1440	P29401;P29401-2	P29401	TKT	TKT	TKT	transketolase	3p21.1	138	131	158	155	149	149	141	133	117	115	120	95	130.415	123.303	141.974	139.826	143.707	144.185	169.824	163.664	117.312	120.56	121.386	94.5198	-1.04591	1.04591	0.452458	0.743249
4207	Q96EN8	Q96EN8	MOCOS	MOCOS	MOCOS	molybdenum cofactor sulfurase	18q12.2	1	1	2	2	5	5	0	0	0	0	0	0	0.945033	0.941247	1.79714	1.80421	4.82237	4.83842	0	0	0	0	0	0	-10000	10000	0.000139872	0.0108935
5514	Q9UII4	Q9UII4	HERC5	HERC5	HERC5	HECT and RLD domain containing E3 ubiquitin protein ligase 5	4q22.1	0	0	1	3	6	6	0	0	0	0	0	0	0	0	0.898568	2.70632	5.78684	5.8061	0	0	0	0	0	0	-10000	10000	0.00457325	0.0674289
2400	Q06830	Q06830	PRDX1	PRDX1	PRDX1	peroxiredoxin 1	1p34.1	122	110	158	166	137	131	119	115	96	128	88	102	115.294	103.537	141.974	149.75	132.133	126.767	143.327	141.514	96.2562	134.189	89.0167	101.484	-1.09021	1.09021	0.294272	0.610514
2298	Q00839;Q00839-2	Q00839	HNRNPU	HNRNPU	HNRNPU	heterogeneous nuclear ribonucleoprotein U	1q44	117	127	114	112	133	130	103	108	121	126	119	113	110.569	119.538	102.437	101.036	128.275	125.799	124.056	132.9	121.323	132.092	120.375	112.429	1.08074	-1.08074	0.157413	0.460113
5650	Q9UPN3;Q9UPN3-4	Q9UPN3	MACF1	MACF1	MACF1	microtubule-actin crosslinking factor 1	1p34.3	145	143	73	139	102	115	95	91	151	128	120	119	137.03	134.598	65.5955	125.393	98.3763	111.284	114.421	111.98	151.403	134.189	121.386	118.398	1.11826	-1.11826	0.229387	0.553052
1023	P0DJI8;P0DJI9-2	P0DJI8	SAA1;SAA2	SAA1	SAA1	serum amyloid A1	11p15.1	2	1	4	6	1	1	0	0	0	0	0	0	1.89007	0.941247	3.59427	5.41264	0.964474	0.967684	0	0	0	0	0	0	-10000	10000	0.000273686	0.0150489
937	P07814	P07814	EPRS	EPRS	EPRS	glutamyl-prolyl-tRNA synthetase	1q41	131	115	134	139	127	122	98	99	96	100	112	105	123.799	108.243	120.408	125.393	122.488	118.057	118.034	121.825	96.2562	104.835	113.294	104.469	-1.09059	1.09059	0.0975466	0.360946
934	P07737	P07737	PFN1	PFN1	PFN1	profilin 1	17p13.2	131	106	124	144	136	110	85	78	117	108	110	128	123.799	99.7722	111.422	129.903	131.168	106.445	102.376	95.9832	117.312	113.222	111.271	127.353	-1.05242	1.05242	0.426888	0.718694
2735	Q14697-2	Q14697-2	GANAB	GANAB	GANAB	glucosidase II alpha subunit	11q12.3	117	129	119	119	120	132	87	102	113	106	98	96	110.569	121.421	106.93	107.351	115.737	127.734	104.785	125.517	113.302	111.125	99.1322	95.5148	-1.06216	1.06216	0.263473	0.575174
3999	Q92574-2;Q92574	Q92574-2	TSC1	TSC1	TSC1	TSC complex subunit 1	9q34	2	3	3	2	2	2	0	0	0	0	0	0	1.89007	2.82374	2.6957	1.80421	1.92895	1.93537	0	0	0	0	0	0	-10000	10000	3.66198e-05	0.00528665
1308	P22626;P22626-2	P22626	HNRNPA2B1	HNRNPA2B1	HNRNPA2B1	heterogeneous nuclear ribonucleoprotein A2/B1	7p15.2	118	123	118	111	103	95	96	84	115	112	118	119	111.514	115.773	106.031	100.134	99.3408	91.93	115.625	103.367	115.307	117.415	119.363	118.398	1.10365	-1.10365	0.0761953	0.32457
4628	Q9BV36-5;Q9BV36-2;Q9BV36;Q9BV36-4;Q9BV36-3	Q9BV36-5	MLPH	MLPH	MLPH	melanophilin	2q37.3	3	1	5	4	1	0	0	0	0	0	0	0	2.8351	0.941247	4.49284	3.60842	0.964474	0	0	0	0	0	0	0	-10000	10000	0.000796893	0.0260597
5286	Q9NYI0-2;Q9NYI0;Q9NYI0-3	Q9NYI0-2	PSD3	PSD3	PSD3	pleckstrin and Sec7 domain containing 3	8p22	4	3	3	0	2	2	0	0	0	0	0	0	3.78013	2.82374	2.6957	0	1.92895	1.93537	0	0	0	0	0	0	-10000	10000	0.000171652	0.011814
2209	P67936;P67936-2	P67936	TPM4	TPM4	TPM4	tropomyosin 4	19p13.12-p13.11	118	115	144	146	82	78	66	61	118	114	112	121	111.514	108.243	129.394	131.707	79.0869	75.4793	79.4922	75.0638	118.315	119.512	113.294	120.388	-1.01495	1.01495	0.945999	0.977076
1293	P21980;P21980-3	P21980	TGM2	TGM2	TGM2	transglutaminase 2	20q11.23	137	136	117	127	119	114	122	114	89	75	65	53	129.47	128.01	105.132	114.567	114.772	110.316	146.94	140.283	89.2375	78.6264	65.751	52.7321	-1.22438	1.22438	0.0918255	0.349555
5875	Q9Y5X2	Q9Y5X2	SNX8	SNX8	SNX8	sorting nexin 8	7p22.3	1	1	5	6	0	1	0	0	0	0	0	0	0.945033	0.941247	4.49284	5.41264	0	0.967684	0	0	0	0	0	0	-10000	10000	0.001913	0.0424084
218	O14734	O14734	ACOT8	ACOT8	ACOT8	acyl-CoA thioesterase 8	20q13.12	3	2	2	3	2	1	0	0	0	0	0	0	2.8351	1.88249	1.79714	2.70632	1.92895	0.967684	0	0	0	0	0	0	-10000	10000	7.27043e-05	0.00768459
1005	P09651;P09651-2;P09651-3	P09651	HNRNPA1	HNRNPA1	HNRNPA1	heterogeneous nuclear ribonucleoprotein A1	12q13.13	111	119	95	98	98	91	82	67	111	105	112	117	104.899	112.008	85.364	88.4064	94.5184	88.0592	98.7631	82.4471	111.296	110.077	113.294	116.409	1.10297	-1.10297	0.0945478	0.3553
1316	P23246;P23246-2	P23246	SFPQ	SFPQ	SFPQ	splicing factor proline and glutamine rich	1p34.3	109	110	89	87	114	96	85	77	124	104	112	97	103.009	103.537	79.9726	78.4832	109.95	92.8976	102.376	94.7527	124.331	109.029	113.294	96.5097	1.12757	-1.12757	0.0739024	0.322972
1559	P35527;CON__P35527	P35527	KRT9	KRT9	KRT9	keratin 9	17q21.2	71	88	94	88	101	83	195	118	98	90	95	82	67.0974	82.8298	84.4654	79.3853	97.4119	80.3177	234.863	145.205	98.2615	94.3516	96.0976	81.5855	1.52666	-1.52666	0.0614069	0.298084
2664	Q14152;Q14152-2	Q14152	EIF3A	EIF3A	EIF3A	eukaryotic translation initiation factor 3 subunit A	10q26.11	123	101	114	105	97	98	83	89	101	95	104	91	116.239	95.066	102.437	94.7211	93.554	94.833	99.9675	109.519	101.27	99.5934	105.202	90.54	1.01548	-1.01548	0.829699	0.950157
3880	Q8TDY2-2;Q8TDY2	Q8TDY2-2	RB1CC1	RB1CC1	RB1CC1	RB1 inducible coiled-coil 1	8q11.23	2	1	2	1	4	3	0	0	0	0	0	0	1.89007	0.941247	1.79714	0.902106	3.8579	2.90305	0	0	0	0	0	0	-10000	10000	0.000123249	0.0105257
3920	Q8WUM4;Q8WUM4-2;Q8WUM4-3	Q8WUM4	PDCD6IP	PDCD6IP	PDCD6IP	programmed cell death 6 interacting protein	3p22.3	97	95	104	118	112	116	84	95	106	99	85	89	91.6682	89.4185	93.4511	106.449	108.021	112.251	101.172	116.903	106.283	103.787	85.982	88.5501	1.00236	-1.00236	0.967855	0.986678
1102	P13667	P13667	PDIA4	PDIA4	PDIA4	protein disulfide isomerase family A member 4	7q36.1	91	101	139	143	70	83	87	84	83	100	97	91	85.998	95.066	124.901	129.001	67.5132	80.3177	104.785	103.367	83.2215	104.835	98.1207	90.54	1.00356	-1.00356	0.876835	0.96504
1405	P27816;P27816-6;P27816-2;P27816-7	P27816	MAP4	MAP4	MAP4	microtubule associated protein 4	3p21.31	113	104	123	113	97	100	68	75	104	81	97	94	106.789	97.8897	110.524	101.938	93.554	96.7684	81.9011	92.2916	104.278	84.9165	98.1207	93.5249	-1.09446	1.09446	0.148127	0.44667
924	P07237	P07237	P4HB	P4HB	P4HB	prolyl 4-hydroxylase subunit beta	17q25.3	92	97	122	116	106	111	79	77	93	85	81	101	86.9431	91.301	109.625	104.644	102.234	107.413	95.1498	94.7527	93.2482	89.1099	81.9358	100.489	-1.08559	1.08559	0.168594	0.48185
2190	P63104;P63104-2	P63104	YWHAZ	YWHAZ	YWHAZ	tyrosine 3-monooxygenase/tryptophan 5-monooxygenase activation protein zeta	8q22.3	116	100	97	94	100	96	88	94	99	84	89	95	109.624	94.1247	87.1611	84.798	96.4474	92.8976	105.99	115.672	99.2642	88.0615	90.0283	94.5198	1.05041	-1.05041	0.468977	0.756782
1900	P52272-2;P52272	P52272-2	HNRNPM	HNRNPM	HNRNPM	heterogeneous nuclear ribonucleoprotein M	19p13.2	124	120	81	96	79	84	87	79	109	92	107	88	117.184	112.95	72.784	86.6022	76.1934	81.2854	104.785	97.2138	109.291	96.4483	108.236	87.5552	1.10335	-1.10335	0.217923	0.542407
1334	P23528	P23528	CFL1	CFL1	CFL1	cofilin 1	11q13.1	107	93	102	109	103	89	70	61	93	98	105	110	101.119	87.536	91.654	98.3296	99.3408	86.1239	84.31	75.0638	93.2482	102.738	106.213	109.444	1.01226	-1.01226	0.732913	0.909648
3916	Q8WUH2	Q8WUH2	TGFBRAP1	TGFBRAP1	TGFBRAP1	transforming growth factor beta receptor associated protein 1	2q12.1-q12.2	1	1	4	2	4	1	0	0	0	0	0	0	0.945033	0.941247	3.59427	1.80421	3.8579	0.967684	0	0	0	0	0	0	-10000	10000	0.000208792	0.0132886
898	P06396-2;P06396-4;P06396;CON__Q3SX14;REV__Q6TDU7-4;REV__Q6TDU7-2;REV__Q6TDU7-3;REV__Q6TDU7	P06396-2	GSN	GSN	GSN	gelsolin	9q33.2	96	97	118	131	77	79	93	93	98	85	86	78	90.7232	91.301	106.031	118.176	74.2645	76.447	112.012	114.442	98.2615	89.1099	86.9936	77.6057	1.03857	-1.03857	0.706028	0.893391
4399	Q96RU3-4;Q96RU3-3;Q96RU3-5;Q96RU3-2;Q96RU3	Q96RU3-4	FNBP1	FNBP1	FNBP1	formin binding protein 1	9q34.11	3	1	4	5	0	0	0	0	0	0	0	0	2.8351	0.941247	3.59427	4.51053	0	0	0	0	0	0	0	0	-10000	10000	0.00379399	0.0615249
2364	Q04637-4;Q04637-5;Q04637-3;Q04637;Q04637-8;Q04637-9;Q04637-6;Q04637-7;REV__Q8NEG2-2;REV__Q8NEG2	Q04637-4	EIF4G1	EIF4G1	EIF4G1	eukaryotic translation initiation factor 4 gamma 1	3q27.1	107	92	105	109	80	86	78	75	95	94	99	94	101.119	86.5947	94.3497	98.3296	77.1579	83.2208	93.9454	92.2916	95.2535	98.545	100.144	93.5249	1.0609	-1.0609	0.341236	0.654494
2355	Q03393	Q03393	PTS	PTS	PTS	6-pyruvoyltetrahydropterin synthase	11q22.3	1	0	3	3	3	2	0	0	0	0	0	0	0.945033	0	2.6957	2.70632	2.89342	1.93537	0	0	0	0	0	0	-10000	10000	0.000335748	0.0165608
1090	P13010	P13010	XRCC5	XRCC5	XRCC5	X-ray repair cross complementing 5	2q35	92	101	85	93	98	102	79	83	100	95	92	88	86.9431	95.066	76.3783	83.8959	94.5184	98.7037	95.1498	102.136	100.267	99.5934	93.0629	87.5552	1.07891	-1.07891	0.218286	0.542417
3071	Q5EBM0-2;Q5EBM0-3;Q5EBM0-4;Q5EBM0	Q5EBM0-2	CMPK2	CMPK2	CMPK2	cytidine/uridine monophosphate kinase 2	2p25.2	0	0	3	1	5	3	0	0	0	0	0	0	0	0	2.6957	0.902106	4.82237	2.90305	0	0	0	0	0	0	-10000	10000	0.00423637	0.0646265
3105	Q5R372-4;Q5R372;Q5R372-3;Q5R372-2	Q5R372-4	RABGAP1L	RABGAP1L	RABGAP1L	RAB GTPase activating protein 1 like	1q25.1	0	2	3	2	2	3	0	0	0	0	0	0	0	1.88249	2.6957	1.80421	1.92895	2.90305	0	0	0	0	0	0	-10000	10000	0.000228695	0.0141016
4727	Q9BYX4;Q9BYX4-2	Q9BYX4	IFIH1	IFIH1	IFIH1	interferon induced with helicase C domain 1	2q24.2	0	0	2	2	4	4	0	0	0	0	0	0	0	0	1.79714	1.80421	3.8579	3.87073	0	0	0	0	0	0	-10000	10000	0.00286391	0.0519985
3468	Q86UP2;Q86UP2-4;Q86UP2-2;Q86UP2-3	Q86UP2	KTN1	KTN1	KTN1	kinectin 1	14q22.1	117	97	75	67	78	75	92	89	106	63	109	94	110.569	91.301	67.3926	60.4411	75.229	72.5763	110.807	109.519	106.283	66.0461	110.259	93.5249	1.24907	-1.24907	0.0557885	0.282958
1025	P0DMV9;P0DMV8;P0DMV8-2	P0DMV9	HSPA1B;HSPA1A	HSPA1B	HSPA1B	heat shock protein family A (Hsp70) member 1B	6p21.33	98	92	80	80	85	89	100	91	80	86	81	75	92.6133	86.5947	71.8855	72.1685	81.9803	86.1239	120.443	111.98	80.2135	90.1582	81.9358	74.6209	1.13836	-1.13836	0.169143	0.482719
1057	P11216	P11216	PYGB	PYGB	PYGB	glycogen phosphorylase B	20p11.21	80	88	66	65	131	137	110	127	65	62	57	46	75.6027	82.8298	59.3055	58.6369	126.346	132.573	132.487	156.28	65.1735	64.9978	57.6585	45.7675	-1.02475	1.02475	0.753928	0.92048
1304	P22314-2;P22314	P22314-2	UBA1	UBA1	UBA1	ubiquitin like modifier activating enzyme 1	Xp11.3	68	81	118	113	89	87	72	76	76	86	87	81	64.2623	76.241	106.031	101.938	85.8382	84.1885	86.7188	93.5221	76.2028	90.1582	88.0051	80.5906	-1.00641	1.00641	0.927928	0.973239
1609	P38646	P38646	HSPA9	HSPA9	HSPA9	heat shock protein family A (Hsp70) member 9	5q31.2	90	80	85	79	98	104	89	91	66	77	76	96	85.053	75.2998	76.3783	71.2664	94.5184	100.639	107.194	111.98	66.1761	80.7231	76.8781	95.5148	1.07018	-1.07018	0.522954	0.796338
5421	Q9UBL6-2;Q9UBL6	Q9UBL6-2	CPNE7	CPNE7	CPNE7	copine 7	16q24.3	2	3	2	2	2	1	0	0	0	0	0	0	1.89007	2.82374	1.79714	1.80421	1.92895	0.967684	0	0	0	0	0	0	-10000	10000	0.000126745	0.0105257
2703	Q14457	Q14457	BECN1	BECN1	BECN1	beclin 1	17q21.31	1	2	3	3	2	0	0	0	0	0	0	0	0.945033	1.88249	2.6957	2.70632	1.92895	0	0	0	0	0	0	0	-10000	10000	0.000424813	0.0189058
2815	Q15172;Q15172-2	Q15172	PPP2R5A	PPP2R5A	PPP2R5A	protein phosphatase 2 regulatory subunit B'alpha	1q32.3	0	0	3	4	1	3	0	0	0	0	0	0	0	0	2.6957	3.60842	0.964474	2.90305	0	0	0	0	0	0	-10000	10000	0.00356761	0.0589851
1404	P27797	P27797	CALR	CALR	CALR	calreticulin	19p13.13	78	91	101	102	87	79	65	58	89	84	91	93	73.7126	85.6535	90.7554	92.0148	83.9092	76.447	78.2878	71.3721	89.2375	88.0615	92.0514	92.5299	1.01801	-1.01801	0.719443	0.900967
1671	P42704	P42704	LRPPRC	LRPPRC	LRPPRC	leucine rich pentatricopeptide repeat containing	2p21	97	94	92	73	87	102	79	85	82	59	81	84	91.6682	88.4772	82.6683	65.8537	83.9092	98.7037	95.1498	104.597	82.2188	61.8527	81.9358	83.5754	-1.00383	1.00383	0.903328	0.968097
2312	Q01518;Q01518-2	Q01518	CAP1	CAP1	CAP1	cyclase associated actin cytoskeleton regulatory protein 1	1p34.2	87	89	93	83	85	85	70	65	94	88	89	84	82.2179	83.771	83.5668	74.8748	81.9803	82.2531	84.31	79.986	94.2509	92.2549	90.0283	83.5754	1.07314	-1.07314	0.253564	0.574633
1150	P15311	P15311	EZR	EZR	EZR	ezrin	6q25.3	92	87	105	100	71	63	87	63	64	86	98	90	86.9431	81.8885	94.3497	90.2106	68.4777	60.9641	104.785	77.5249	64.1708	90.1582	99.1322	89.5451	1.08799	-1.08799	0.370745	0.670529
1540	P34932;P34932-2	P34932	HSPA4	HSPA4	HSPA4	heat shock protein family A (Hsp70) member 4	5q31.1	94	98	68	77	112	114	69	73	76	71	75	71	88.8331	92.2422	61.1026	69.4622	108.021	110.316	83.1055	89.8304	76.2028	74.433	75.8665	70.6411	-1.12742	1.12742	0.274255	0.587095
5367	Q9P1Y5;Q9P1Y5-2	Q9P1Y5	CAMSAP3	CAMSAP3	CAMSAP3	calmodulin regulated spectrin associated protein family member 3	19p13.2	1	0	6	4	0	0	0	0	0	0	0	0	0.945033	0	5.39141	3.60842	0	0	0	0	0	0	0	0	-10000	10000	0.0216404	0.168486
5813	Q9Y4G2	Q9Y4G2	PLEKHM1	PLEKHM1	PLEKHM1	pleckstrin homology and RUN domain containing M1	17q21.31	2	1	3	3	1	1	0	0	0	0	0	0	1.89007	0.941247	2.6957	2.70632	0.964474	0.967684	0	0	0	0	0	0	-10000	10000	0.000274588	0.0150489
1597	P36959	P36959	GMPR	GMPR	GMPR	guanosine monophosphate reductase	6p22.3	0	1	1	1	3	4	0	0	0	0	0	0	0	0.941247	0.898568	0.902106	2.89342	3.87073	0	0	0	0	0	0	-10000	10000	0.00179735	0.0415566
1745	P48382-2;P48382	P48382-2	RFX5	RFX5	RFX5	regulatory factor X5	1q21.3	1	1	2	2	2	2	0	0	0	0	0	0	0.945033	0.941247	1.79714	1.80421	1.92895	1.93537	0	0	0	0	0	0	-10000	10000	0.000452914	0.0197118
2483	Q12906-7;Q12906;Q12906-4;Q12906-6;Q12906-5;Q12906-2;Q12906-3	Q12906-7	ILF3	ILF3	ILF3	interleukin enhancer binding factor 3	19p13.2	90	93	78	84	91	82	67	76	80	89	75	75	85.053	87.536	70.0883	75.7769	87.7671	79.3501	80.6967	93.5221	80.2135	93.3033	75.8665	74.6209	1.02605	-1.02605	0.724034	0.903935
2723	Q14678;Q14678-2	Q14678	KANK1	KANK1	KANK1	KN motif and ankyrin repeat domains 1	9p24.3	0	1	7	2	0	0	0	0	0	0	0	0	0	0.941247	6.28998	1.80421	0	0	0	0	0	0	0	0	-10000	10000	0.0246431	0.179078
3584	Q8IXJ6-2;Q8IXJ6-3;Q8IXJ6;Q8IXJ6-4;Q8IXJ6-5	Q8IXJ6-2	SIRT2	SIRT2	SIRT2	sirtuin 2	19q13.2	2	0	3	5	0	0	0	0	0	0	0	0	1.89007	0	2.6957	4.51053	0	0	0	0	0	0	0	0	-10000	10000	0.0172252	0.147976
2381	Q05682-4;Q05682-6;Q05682-2;Q05682;REV__O75334-6;REV__O75334-5;REV__Q13136-2;REV__Q13136;REV__O75334-2;REV__O75334-4;REV__O75334-3;REV__O75334	Q05682-4	CALD1	CALD1	CALD1	caldesmon 1	7q33	102	95	115	103	33	30	21	16	79	100	134	114	96.3934	89.4185	103.335	92.9169	31.8276	29.0305	25.293	19.6889	79.2108	104.835	135.548	113.424	1.0792	-1.0792	0.958305	0.98271
951	P08133;P08133-2	P08133	ANXA6	ANXA6	ANXA6	annexin A6	5q33.1	93	94	56	46	103	115	26	19	79	96	88	123	87.8881	88.4772	50.3198	41.4969	99.3408	111.284	31.3151	23.3805	79.2108	100.642	89.0167	122.378	-1.07369	1.07369	0.571126	0.828357
872	P05023-4;P05023;P05023-3;P05023-2;P13637;P13637-2;P13637-3;Q13733;P20648;P54707;P54707-2	P05023-4	ATP1A1;ATP1A3;ATP1A4;ATP4A;ATP12A	ATP1A1	ATP1A1	ATPase Na+/K+ transporting subunit alpha 1	1p13.1	67	72	96	90	98	97	78	83	69	67	57	60	63.3172	67.7698	86.2626	81.1896	94.5184	93.8653	93.9454	102.136	69.1841	70.2395	57.6585	59.6967	-1.07522	1.07522	0.420376	0.715461
3616	Q8IYM9;Q8IYM9-2	Q8IYM9	TRIM22	TRIM22	TRIM22	tripartite motif containing 22	11p15.4	0	0	3	5	0	2	0	0	0	0	0	0	0	0	2.6957	4.51053	0	1.93537	0	0	0	0	0	0	-10000	10000	0.0173327	0.14804
4298	Q96JC1-2;Q96JC1	Q96JC1-2	VPS39	VPS39	VPS39	VPS39, HOPS complex subunit	15q15.1	0	2	2	3	1	2	0	0	0	0	0	0	0	1.88249	1.79714	2.70632	0.964474	1.93537	0	0	0	0	0	0	-10000	10000	0.000588278	0.0221856
1164	P15924;P15924-3;P15924-2	P15924	DSP	DSP	DSP	desmoplakin	6p24.3	116	112	75	74	72	77	35	25	74	89	86	78	109.624	105.42	67.3926	66.7559	69.4421	74.5116	42.155	30.7639	74.1975	93.3033	86.9936	77.6057	-1.21759	1.21759	0.196393	0.526359
1563	P35580;P35580-3;P35580-5	P35580	MYH10	MYH10	MYH10	myosin heavy chain 10	17p13.1	102	89	92	82	61	71	57	46	80	83	78	70	96.3934	83.771	82.6683	73.9727	58.8329	68.7055	68.6524	56.6055	80.2135	87.0132	78.9012	69.6462	-1.05286	1.05286	0.586696	0.835776
4333	Q96ME7-2;Q96ME7-3;Q96ME7	Q96ME7-2	ZNF512	ZNF512	ZNF512	zinc finger protein 512	2p23.3	0	2	1	2	3	2	0	0	0	0	0	0	0	1.88249	0.898568	1.80421	2.89342	1.93537	0	0	0	0	0	0	-10000	10000	0.000613547	0.0229847
2420	Q08211;Q08211-2	Q08211	DHX9	DHX9	DHX9	DExH-box helicase 9	1q25.3	84	85	76	56	69	83	64	65	84	73	82	82	79.3828	80.006	68.2912	50.5179	66.5487	80.3177	77.0834	79.986	84.2242	76.5297	82.9474	81.5855	1.13478	-1.13478	0.0642444	0.303558
919	P07195	P07195	LDHB	LDHB	LDHB	lactate dehydrogenase B	12p12.1	69	74	57	51	74	80	117	114	70	65	65	66	65.2073	69.6523	51.2184	46.0074	71.3711	77.4147	140.918	140.283	70.1868	68.1428	65.751	65.6664	1.44655	-1.44655	0.0823271	0.328365
4060	Q92945	Q92945	KHSRP	KHSRP	KHSRP	KH-type splicing regulatory protein	19p13.3	80	84	90	91	77	74	57	58	74	75	70	66	75.6027	79.0648	80.8711	82.0917	74.2645	71.6086	68.6524	71.3721	74.1975	78.6264	70.8087	65.6664	-1.07961	1.07961	0.263228	0.574924
4772	Q9GZM7-3;Q9GZM7	Q9GZM7-3	TINAGL1	TINAGL1	TINAGL1	tubulointerstitial nephritis antigen like 1	1p35.2	1	1	3	1	2	2	0	0	0	0	0	0	0.945033	0.941247	2.6957	0.902106	1.92895	1.93537	0	0	0	0	0	0	-10000	10000	0.000468395	0.0199115
117	O00194	O00194	RAB27B	RAB27B	RAB27B	RAB27B, member RAS oncogene family	18q21.2	1	1	2	2	2	1	0	0	0	0	0	0	0.945033	0.941247	1.79714	1.80421	1.92895	0.967684	0	0	0	0	0	0	-10000	10000	0.000867919	0.0277687
2394	Q06481-5;Q06481-4;Q06481-2;Q06481-3;Q06481-6;Q06481	Q06481-5	APLP2	APLP2	APLP2	amyloid beta precursor like protein 2	11q24.3	0	1	1	1	4	2	0	0	0	0	0	0	0	0.941247	0.898568	0.902106	3.8579	1.93537	0	0	0	0	0	0	-10000	10000	0.00209521	0.0447709
3021	Q4KMQ1;Q4KMQ1-2;Q4KMQ1-4;Q4KMQ1-3	Q4KMQ1	TPRN	TPRN	TPRN	taperin	9q34.3	1	1	3	4	0	0	0	0	0	0	0	0	0.945033	0.941247	2.6957	3.60842	0	0	0	0	0	0	0	0	-10000	10000	0.00592393	0.0814191
3427	Q7Z5Q1-5;Q7Z5Q1-6;Q7Z5Q1-7;Q7Z5Q1-4;Q7Z5Q1-3;Q7Z5Q1;Q7Z5Q1-8;Q7Z5Q1-9	Q7Z5Q1-5	CPEB2	CPEB2	CPEB2	cytoplasmic polyadenylation element binding protein 2	4p15.32	0	1	1	2	2	3	0	0	0	0	0	0	0	0.941247	0.898568	1.80421	1.92895	2.90305	0	0	0	0	0	0	-10000	10000	0.00112578	0.0331518
3483	Q86VP1-4;Q86VP1-3;Q86VP1-2;Q86VP1	Q86VP1-4	TAX1BP1	TAX1BP1	TAX1BP1	Tax1 binding protein 1	7p15.2	1	0	4	3	1	0	0	0	0	0	0	0	0.945033	0	3.59427	2.70632	0.964474	0	0	0	0	0	0	0	-10000	10000	0.00595781	0.0814191
1384	P26640;P26640-2	P26640	VARS	VARS	VARS	valyl-tRNA synthetase	6p21.33	86	74	54	40	77	72	76	85	75	58	76	69	81.2729	69.6523	48.5227	36.0842	74.2645	69.6732	91.5365	104.597	75.2002	60.8044	76.8781	68.6512	1.25878	-1.25878	0.0790407	0.32492
3550	Q8IVL1-4;Q8IVL1-8;Q8IVL1-9;Q8IVL1-10;Q8IVL1-13;Q8IVL1-12;Q8IVL1-11;Q8IVL1-3;Q8IVL1-2;Q8IVL1;Q8IVL1-5	Q8IVL1-4	NAV2	NAV2	NAV2	neuron navigator 2	11p15.1	0	1	4	3	1	0	0	0	0	0	0	0	0	0.941247	3.59427	2.70632	0.964474	0	0	0	0	0	0	0	-10000	10000	0.00595117	0.0814191
988	P09211	P09211	GSTP1	GSTP1	GSTP1	glutathione S-transferase pi 1	11q13.2	71	69	82	79	56	51	53	46	87	91	74	80	67.0974	64.9461	73.6826	71.2664	54.0105	49.3519	63.8347	56.6055	87.2322	95.4	74.855	79.5956	1.20288	-1.20288	0.0561006	0.284054
4715	Q9BYG5;Q9BYG5-2;Q9NPB6-2;Q9NPB6;Q9BYG4	Q9BYG5	PARD6B;PARD6A;PARD6G	PARD6B	PARD6B	par-6 family cell polarity regulator beta	20q13.13	2	2	1	2	1	1	0	0	0	0	0	0	1.89007	1.88249	0.898568	1.80421	0.964474	0.967684	0	0	0	0	0	0	-10000	10000	0.000867919	0.0277687
990	P09382	P09382	LGALS1	LGALS1	LGALS1	galectin 1	22q13.1	75	63	80	85	85	63	39	36	79	70	72	86	70.8775	59.2986	71.8855	76.679	81.9803	60.9641	46.9727	44.2999	79.2108	73.3846	72.8318	85.5653	-1.04828	1.04828	0.6403	0.850232
1082	P12270;P12270-2	P12270	TPR	TPR	TPR	translocated promoter region, nuclear basket protein	1q31.1	81	80	61	59	67	66	61	48	78	84	76	72	76.5477	75.2998	54.8127	53.2243	64.6198	63.8671	73.4701	59.0666	78.2082	88.0615	76.8781	71.6361	1.15179	-1.15179	0.061126	0.298084
2756	Q14974;Q14974-2	Q14974	KPNB1	KPNB1	KPNB1	karyopherin subunit beta 1	17q21.32	73	79	53	65	86	80	59	56	82	69	61	65	68.9874	74.3585	47.6241	58.6369	82.9448	77.4147	71.0612	68.911	82.2188	72.3362	61.7048	64.6714	1.02668	-1.02668	0.693819	0.886102
2047	P60660-2;P60660	P60660-2	MYL6	MYL6	MYL6	myosin light chain 6	12q13.2	73	69	70	81	71	57	51	51	78	71	72	83	68.9874	64.9461	62.8998	73.0706	68.4777	55.158	61.4258	62.7583	78.2082	74.433	72.8318	82.5805	1.09833	-1.09833	0.160088	0.464946
912	P06753-2;P06753-3;P06753-5;P06753-4;P06753-7	P06753-2	TPM3	TPM3	TPM3	tropomyosin 3	1q21.3	79	76	80	77	74	70	55	52	67	61	62	64	74.6576	71.5348	71.8855	69.4622	71.3711	67.7379	66.2435	63.9888	67.1788	63.9494	62.7163	63.6765	-1.10031	1.10031	0.185826	0.509451
2125	P62258;P62258-2	P62258	YWHAE	YWHAE	YWHAE	tyrosine 3-monooxygenase/tryptophan 5-monooxygenase activation protein epsilon	17p13.3	73	81	74	77	67	70	61	48	73	62	62	68	68.9874	76.241	66.4941	69.4622	64.6198	67.7379	73.4701	59.0666	73.1948	64.9978	62.7163	67.6563	-1.03102	1.03102	0.683199	0.881264
1722	P46821;P78559;P78559-2	P46821	MAP1B;MAP1A	MAP1B	MAP1B	microtubule associated protein 1B	5q13.2	108	99	44	37	64	56	13	13	104	92	88	94	102.064	93.1835	39.537	33.3779	61.7263	54.1903	15.6576	15.9972	104.278	96.4483	89.0167	93.5249	1.08031	-1.08031	0.800937	0.943754
4931	Q9H7C4-2;Q9H7C4	Q9H7C4-2	SYNC	SYNC	SYNC	syncoilin, intermediate filament protein	1p35.1	1	1	1	1	1	4	0	0	0	0	0	0	0.945033	0.941247	0.898568	0.902106	0.964474	3.87073	0	0	0	0	0	0	-10000	10000	0.00122063	0.034903
927	P07339	P07339	CTSD	CTSD	CTSD	cathepsin D	11p15.5	78	74	66	67	96	91	77	71	48	43	42	50	73.7126	69.6523	59.3055	60.4411	92.5895	88.0592	92.741	87.3693	48.1281	45.0791	42.4852	49.7473	-1.21395	1.21395	0.135687	0.422256
1070	P11586	P11586	MTHFD1	MTHFD1	MTHFD1	methylenetetrahydrofolate dehydrogenase, cyclohydrolase and formyltetrahydrofolate synthetase 1	14q23.3	69	72	59	64	63	74	67	64	69	71	65	65	65.2073	67.7698	53.0155	57.7348	60.7619	71.6086	80.6967	78.7555	69.1841	74.433	65.751	64.6714	1.1526	-1.1526	0.0583204	0.291527
5573	Q9UL26	Q9UL26	RAB22A	RAB22A	RAB22A	RAB22A, member RAS oncogene family	20q13.32	1	2	2	2	1	1	0	0	0	0	0	0	0.945033	1.88249	1.79714	1.80421	0.964474	0.967684	0	0	0	0	0	0	-10000	10000	0.000867919	0.0277687
806	P00367;P00367-3;P00367-2	P00367	GLUD1	GLUD1	GLUD1	glutamate dehydrogenase 1	10q23.2	62	61	70	74	66	60	108	102	49	51	45	51	58.5921	57.4161	62.8998	66.7559	63.6553	58.061	130.078	125.517	49.1308	53.4659	45.5199	50.7422	1.23701	-1.23701	0.572281	0.828404
1523	P33176	P33176	KIF5B	KIF5B	KIF5B	kinesin family member 5B	10p11.22	75	77	66	68	77	77	51	48	63	71	62	64	70.8775	72.476	59.3055	61.3432	74.2645	74.5116	61.4258	59.0666	63.1681	74.433	62.7163	63.6765	-1.07358	1.07358	0.367643	0.670529
2543	Q13263;Q13263-2	Q13263	TRIM28	TRIM28	TRIM28	tripartite motif containing 28	19q13.4	73	86	69	67	69	70	43	45	79	63	66	69	68.9874	80.9473	62.0012	60.4411	66.5487	67.7379	51.7904	55.3749	79.2108	66.0461	66.7625	68.6512	-1.04855	1.04855	0.619469	0.842324
2686	Q14247	Q14247	CTTN	CTTN	CTTN	cortactin	11q13.3	83	67	80	80	74	74	62	64	46	57	61	49	78.4378	63.0636	71.8855	72.1685	71.3711	71.6086	74.6745	78.7555	46.1228	59.756	61.7048	48.7523	-1.15894	1.15894	0.0511688	0.273353
1834	P50395;P50395-2	P50395	GDI2	GDI2	GDI2	GDP dissociation inhibitor 2	10p15.1	46	67	82	80	72	68	54	57	64	63	69	70	43.4715	63.0636	73.6826	72.1685	69.4421	65.8025	65.0391	70.1416	64.1708	66.0461	69.7972	69.6462	1.0444	-1.0444	0.563071	0.825504
4003	Q92598-2;Q92598;Q92598-3	Q92598-2	HSPH1	HSPH1	HSPH1	heat shock protein family H (Hsp110) member 1	13q12.3	55	82	76	77	71	75	41	43	75	66	65	65	51.9768	77.1823	68.2912	69.4622	68.4777	72.5763	49.3815	52.9138	75.2002	69.1912	65.751	64.6714	-1.08183	1.08183	0.352134	0.662257
5926	Q9Y6U3;Q9Y6U3-2;Q9Y6U3-3	Q9Y6U3	SCIN	SCIN	SCIN	scinderin	7p21.3	45	54	126	135	74	63	76	79	47	44	21	18	42.5265	50.8274	113.22	121.784	71.3711	60.9641	91.5365	97.2138	47.1254	46.1275	21.2426	17.909	-1.43449	1.43449	0.135175	0.42169
866	P04792	P04792	HSPB1	HSPB1	HSPB1	heat shock protein family B (small) member 1	7q11.23	61	56	71	70	61	62	32	34	83	80	79	86	57.647	52.7098	63.7983	63.1474	58.8329	59.9964	38.5417	41.8388	83.2215	83.8681	79.9127	85.5653	1.15954	-1.15954	0.359303	0.666608
2284	Q00341;Q00341-2	Q00341	HDLBP	HDLBP	HDLBP	high density lipoprotein binding protein	2q37.3	70	70	66	63	64	77	56	61	70	45	67	66	66.1523	65.8873	59.3055	56.8327	61.7263	74.5116	67.448	75.0638	70.1868	47.1758	67.7741	65.6664	1.02315	-1.02315	0.775776	0.932069
5662	Q9UPW5-2;Q9UPW5;Q9UPW5-3	Q9UPW5-2	AGTPBP1	AGTPBP1	AGTPBP1	ATP/GTP binding protein 1	9q21.33	2	2	3	0	1	1	0	0	0	0	0	0	1.89007	1.88249	2.6957	0	0.964474	0.967684	0	0	0	0	0	0	-10000	10000	0.00110284	0.0329683
1511	P31948;P31948-2;P31948-3	P31948	STIP1	STIP1	STIP1	stress induced phosphoprotein 1	11q13.1	80	68	70	67	69	75	48	60	67	64	66	38	75.6027	64.0048	62.8998	60.4411	66.5487	72.5763	57.8125	73.8332	67.1788	67.0945	66.7625	37.8079	-1.08525	1.08525	0.296484	0.611886
4318	Q96KP4;Q96KP4-2	Q96KP4	CNDP2	CNDP2	CNDP2	carnosine dipeptidase 2	18q22.3	52	63	80	86	77	77	58	57	53	59	52	57	49.1417	59.2986	71.8855	77.5811	74.2645	74.5116	69.8568	70.1416	53.1414	61.8527	52.6008	56.7119	-1.11633	1.11633	0.165946	0.477046
2206	P67809	P67809	YBX1	YBX1	YBX1	Y-box binding protein 1	1p34.2	68	66	81	70	61	58	40	47	67	57	73	79	64.2623	62.1223	72.784	63.1474	58.8329	56.1257	48.1771	57.836	67.1788	59.756	73.8434	78.6007	1.02152	-1.02152	0.691124	0.884932
5663	Q9UPX8-3;Q9UPX8-4;Q9UPX8;Q9UPX8-2	Q9UPX8-3	SHANK2	SHANK2	SHANK2	SH3 and multiple ankyrin repeat domains 2	11q13.3-q13.4	0	0	3	3	2	1	0	0	0	0	0	0	0	0	2.6957	2.70632	1.92895	0.967684	0	0	0	0	0	0	-10000	10000	0.0033583	0.056311
325	O15446;O15446-2	O15446	CD3EAP	CD3EAP	CD3EAP	CD3e molecule associated protein	19q13.32	1	1	2	2	1	1	0	0	0	0	0	0	0.945033	0.941247	1.79714	1.80421	0.964474	0.967684	0	0	0	0	0	0	-10000	10000	0.00166103	0.0401292
1230	P18669;Q8N0Y7;P15259	P18669	PGAM1;PGAM4;PGAM2	PGAM1	PGAM1	phosphoglycerate mutase 1	10q24.1	61	61	68	72	66	70	59	59	61	61	63	61	57.647	57.4161	61.1026	64.9516	63.6553	67.7379	71.0612	72.6027	61.1628	63.9494	63.7279	60.6917	1.05553	-1.05553	0.515881	0.789221
133	O00299	O00299	CLIC1	CLIC1	CLIC1	chloride intracellular channel 1	6p21.33	68	68	61	53	67	68	64	53	63	64	59	64	64.2623	64.0048	54.8127	47.8116	64.6198	65.8025	77.0834	65.2194	63.1681	67.0945	59.6816	63.6765	1.09579	-1.09579	0.23174	0.556459
908	P06744;P06744-2	P06744	GPI	GPI	GPI	glucose-6-phosphate isomerase	19q13.11	48	53	77	76	61	66	74	57	60	52	58	66	45.3616	49.8861	69.1898	68.5601	58.8329	63.8671	89.1277	70.1416	60.1601	54.5143	58.6701	65.6664	1.11972	-1.11972	0.263012	0.574665
110	O00159-3;O00159;O00159-2	O00159-3	MYO1C	MYO1C	MYO1C	myosin IC	17p13.3	41	65	66	68	76	72	42	54	60	75	60	68	38.7464	61.1811	59.3055	61.3432	73.3	69.6732	50.586	66.4499	60.1601	78.6264	60.6932	67.6563	1.05673	-1.05673	0.51221	0.786452
5822	Q9Y4L1;Q9Y4L1-2	Q9Y4L1	HYOU1	HYOU1	HYOU1	hypoxia up-regulated 1	11q23.3	72	59	73	50	60	70	43	63	69	57	59	67	68.0424	55.5336	65.5955	45.1053	57.8684	67.7379	51.7904	77.5249	69.1841	59.756	59.6816	66.6613	1.06868	-1.06868	0.376069	0.674123
1001	P09525;P09525-2	P09525	ANXA4	ANXA4	ANXA4	annexin A4	2p13.3	62	68	63	58	73	87	88	83	45	45	33	35	58.5921	64.0048	56.6098	52.3222	70.4066	84.1885	105.99	102.136	45.1201	47.1758	33.3813	34.8231	-1.04747	1.04747	0.497894	0.772688
1052	P11169;Q8TDB8-4;Q8TDB8-2;Q8TDB8;Q8TDB8-5	P11169	SLC2A3;SLC2A14	SLC2A3	SLC2A3	solute carrier family 2 member 3	12p13.31	1	0	4	2	0	1	0	0	0	0	0	0	0.945033	0	3.59427	1.80421	0	0.967684	0	0	0	0	0	0	-10000	10000	0.0066168	0.0849562
1206	P17676-3;P17676-2;P17676	P17676-3	CEBPB	CEBPB	CEBPB	CCAAT enhancer binding protein beta	20q13.13	1	2	1	0	3	1	0	0	0	0	0	0	0.945033	1.88249	0.898568	0	2.89342	0.967684	0	0	0	0	0	0	-10000	10000	0.00204575	0.0441927
3149	Q5THJ4-2;Q5THJ4	Q5THJ4-2	VPS13D	VPS13D	VPS13D	vacuolar protein sorting 13 homolog D	1p36.22-p36.21	1	1	2	3	0	1	0	0	0	0	0	0	0.945033	0.941247	1.79714	2.70632	0	0.967684	0	0	0	0	0	0	-10000	10000	0.00195326	0.0426617
3501	Q86WV6	Q86WV6	TMEM173	TMEM173	TMEM173	transmembrane protein 173	5q31.2	0	0	4	3	0	1	0	0	0	0	0	0	0	0	3.59427	2.70632	0	0.967684	0	0	0	0	0	0	-10000	10000	0.0209773	0.164675
1756	P48643;P48643-2	P48643	CCT5	CCT5	CCT5	chaperonin containing TCP1 subunit 5	5p15.2	61	60	58	58	59	64	43	43	71	65	62	73	57.647	56.4748	52.117	52.3222	56.904	61.9318	51.7904	52.9138	71.1895	68.1428	62.7163	72.631	1.12444	-1.12444	0.0962606	0.358118
3691	Q8N584-2;Q8N584	Q8N584-2	TTC39C	TTC39C	TTC39C	tetratricopeptide repeat domain 39C	18q11.2	1	0	3	4	0	0	0	0	0	0	0	0	0.945033	0	2.6957	3.60842	0	0	0	0	0	0	0	0	-10000	10000	0.0209186	0.164432
1633	P40926;P40926-2	P40926	MDH2	MDH2	MDH2	malate dehydrogenase 2	7q11.23	65	58	74	75	54	53	59	59	55	51	51	53	61.4272	54.5923	66.4941	67.658	52.0816	51.2872	71.0612	72.6027	55.1468	53.4659	51.5892	52.7321	1.00865	-1.00865	0.936617	0.973745
2404	Q07157	Q07157	TJP1	TJP1	TJP1	tight junction protein 1	15q13.1	61	64	53	50	52	48	35	35	73	75	84	76	57.647	60.2398	47.6241	45.1053	50.1526	46.4488	42.155	43.0694	73.1948	78.6264	84.9705	75.6158	1.2943	-1.2943	0.0607139	0.297238
250	P19105;O14950;P24844;P24844-2	P19105	MYL12A;MYL12B;MYL9	MYL12A	MYL12A	myosin light chain 12A	18p11.31	72	67	69	74	46	47	40	31	69	59	58	72	68.0424	63.0636	62.0012	66.7559	44.3658	45.4811	48.1771	38.1472	69.1841	61.8527	58.6701	71.6361	-1.00588	1.00588	0.992943	0.99638
1167	P16070-12;P16070-14;P16070-13;P16070-8;P16070-18;P16070-11;P16070-10;P16070-16;P16070-17;P16070-6;P16070-4;P16070-3;P16070-7;P16070-5;P16070;P16070-15;P16070-9;P16070-19	P16070-12	CD44	CD44	CD44	CD44 molecule (Indian blood group)	11p13	62	64	59	60	72	70	67	60	55	44	47	41	58.5921	60.2398	53.0155	54.1264	69.4421	67.7379	80.6967	73.8332	55.1468	46.1275	47.543	40.7928	-1.05525	1.05525	0.484168	0.762236
4702	Q9BY50	Q9BY50	SEC11C	SEC11C	SEC11C	SEC11 homolog C, signal peptidase complex subunit	18q21.32	0	0	3	3	1	1	0	0	0	0	0	0	0	0	2.6957	2.70632	0.964474	0.967684	0	0	0	0	0	0	-10000	10000	0.00542285	0.0772592
1349	P24821-4;P24821;P24821-2;P24821-5;P24821-3;P24821-6	P24821-4	TNC	TNC	TNC	tenascin C	9q33.1	49	44	86	78	52	41	64	52	67	54	56	50	46.3066	41.4149	77.2769	70.3643	50.1526	39.675	77.0834	63.9888	67.1788	56.611	56.647	49.7473	1.14166	-1.14166	0.25304	0.574633
1577	P35908;CON__P35908;Q01546;CON__Q01546;CON__Q7Z794;Q7Z794;CON__Q8N1N4-2;CON__Q7RTT2;Q8N1N4-2;Q8N1N4	P35908	KRT2;KRT76;KRT77;KRT78	KRT2	KRT2	keratin 2	12q13.13	50	51	44	53	46	47	108	93	49	47	51	51	47.2517	48.0036	39.537	47.8116	44.3658	45.4811	130.078	114.442	49.1308	49.2725	51.5892	50.7422	1.63426	-1.63426	0.0645897	0.3039
5053	Q9NP80-3;Q9NP80-2;Q9NP80	Q9NP80-3	PNPLA8	PNPLA8	PNPLA8	patatin like phospholipase domain containing 8	7q31.1	1	1	2	3	0	1	0	0	0	0	0	0	0.945033	0.941247	1.79714	2.70632	0	0.967684	0	0	0	0	0	0	-10000	10000	0.00195326	0.0426617
1997	P55786;P55786-2;A6NEC2;A6NEC2-2;A6NEC2-3	P55786	NPEPPS;NPEPPSL1	NPEPPS	NPEPPS	aminopeptidase puromycin sensitive	17q21.32	58	70	66	61	57	59	51	56	61	53	50	47	54.8119	65.8873	59.3055	55.0285	54.975	57.0933	61.4258	68.911	61.1628	55.5626	50.5777	46.7624	-1.00784	1.00784	0.83544	0.950956
1465	P30086	P30086	PEBP1	PEBP1	PEBP1	phosphatidylethanolamine binding protein 1	12q24.23	68	58	64	64	66	60	64	46	57	58	38	43	64.2623	54.5923	57.5084	57.7348	63.6553	58.061	77.0834	56.6055	57.1521	60.8044	38.439	42.7827	-1.06894	1.06894	0.367646	0.670529
5260	Q9NXD2;Q9NXD2-2	Q9NXD2	MTMR10	MTMR10	MTMR10	myotubularin related protein 10	15q13.3	1	2	1	1	1	2	0	0	0	0	0	0	0.945033	1.88249	0.898568	0.902106	0.964474	1.93537	0	0	0	0	0	0	-10000	10000	0.00166103	0.0401292
1205	P17655;P17655-2	P17655	CAPN2	CAPN2	CAPN2	calpain 2	1q41	70	68	66	63	49	50	58	58	44	56	56	43	66.1523	64.0048	59.3055	56.8327	47.2592	48.3842	69.8568	71.3721	44.1174	58.7077	56.647	42.7827	1.00452	-1.00452	0.909047	0.970886
1137	P14866;P14866-2	P14866	HNRNPL	HNRNPL	HNRNPL	heterogeneous nuclear ribonucleoprotein L	19q13.2	63	59	55	61	47	55	33	46	64	63	65	61	59.5371	55.5336	49.4213	55.0285	45.3303	53.2226	39.7461	56.6055	64.1708	66.0461	65.751	60.6917	1.10984	-1.10984	0.15636	0.458485
5403	Q9P2Y5;Q9P2Y5-2	Q9P2Y5	UVRAG	UVRAG	UVRAG	UV radiation resistance associated	11q13.5	0	0	2	3	2	1	0	0	0	0	0	0	0	0	1.79714	2.70632	1.92895	0.967684	0	0	0	0	0	0	-10000	10000	0.00355361	0.0589182
942	P07910-2;P07910-4	P07910-2	HNRNPC	HNRNPC	HNRNPC	heterogeneous nuclear ribonucleoprotein C (C1/C2)	14q11.2	60	61	56	58	54	54	56	43	55	55	56	61	56.702	57.4161	50.3198	52.3222	52.0816	52.2549	67.448	52.9138	55.1468	57.6593	56.647	60.6917	1.09159	-1.09159	0.277178	0.590771
5593	Q9ULK4-2;Q9ULK4-4;Q9ULK4-5;Q9ULK4-3;Q9ULK4;Q9ULK4-6	Q9ULK4-2	MED23	MED23	MED23	mediator complex subunit 23	6q23.2	2	2	0	1	2	1	0	0	0	0	0	0	1.89007	1.88249	0	0.902106	1.92895	0.967684	0	0	0	0	0	0	-10000	10000	0.00173999	0.0411299
2935	Q16658	Q16658	FSCN1	FSCN1	FSCN1	fascin actin-bundling protein 1	7p22.1	57	59	79	75	47	43	29	33	61	61	60	60	53.8669	55.5336	70.9869	67.658	45.3303	41.6104	34.9284	40.6083	61.1628	63.9494	60.6932	59.6967	-1.04344	1.04344	0.744581	0.915453
214	O14727-5;O14727-3;O14727-4;O14727-2;O14727;O14727-6	O14727-5	APAF1	APAF1	APAF1	apoptotic peptidase activating factor 1	12q23.1	2	0	1	0	2	2	0	0	0	0	0	0	1.89007	0	0.898568	0	1.92895	1.93537	0	0	0	0	0	0	-10000	10000	0.00417968	0.064594
2678	Q14195-2;Q14195;Q14117;O14531	Q14195-2	DPYSL3;DPYS;DPYSL4	DPYSL3	DPYSL3	dihydropyrimidinase like 3	5q32	64	60	24	19	38	42	23	25	71	92	108	91	60.4821	56.4748	21.5656	17.14	36.65	40.6427	27.7018	30.7639	71.1895	96.4483	109.248	90.54	1.82821	-1.82821	0.0690658	0.311823
1047	P11047	P11047	LAMC1	LAMC1	LAMC1	laminin subunit gamma 1	1q25.3	64	59	46	51	63	56	32	35	64	54	64	68	60.4821	55.5336	41.3341	46.0074	60.7619	54.1903	38.5417	43.0694	64.1708	56.611	64.7394	67.6563	1.05177	-1.05177	0.538544	0.810179
483	O60825-2;O60825;P16118-2;P16118	O60825-2	PFKFB2;PFKFB1	PFKFB2	PFKFB2	6-phosphofructo-2-kinase/fructose-2,6-biphosphatase 2	1q32.1	0	1	3	3	0	0	0	0	0	0	0	0	0	0.941247	2.6957	2.70632	0	0	0	0	0	0	0	0	-10000	10000	0.0201675	0.161884
649	O94854;O94854-2	O94854	KIAA0754	KIAA0754	KIAA0754	KIAA0754	1p34.2	2	1	1	0	1	2	0	0	0	0	0	0	1.89007	0.941247	0.898568	0	0.964474	1.93537	0	0	0	0	0	0	-10000	10000	0.00334183	0.0562549
2024	P57078-2;P57078	P57078-2	RIPK4	RIPK4	RIPK4	receptor interacting serine/threonine kinase 4	21q22.3	1	2	2	1	1	0	0	0	0	0	0	0	0.945033	1.88249	1.79714	0.902106	0.964474	0	0	0	0	0	0	0	-10000	10000	0.00334183	0.0562549
1288	P21796	P21796	VDAC1	VDAC1	VDAC1	voltage dependent anion channel 1	5q31.1	64	59	49	50	60	58	48	45	54	50	56	55	60.4821	55.5336	44.0298	45.1053	57.8684	56.1257	57.8125	55.3749	54.1441	52.4176	56.647	54.722	1.03752	-1.03752	0.630238	0.850091
2128	P62269	P62269	RPS18	RPS18	RPS18	ribosomal protein S18	6p21.32	54	53	63	63	61	52	48	34	56	49	56	59	51.0318	49.8861	56.6098	56.8327	58.8329	50.3196	57.8125	41.8388	56.1494	51.3692	56.647	58.7018	-1.00308	1.00308	0.987934	0.995333
1607	P38159;P38159-2;O75526;Q8N7X1	P38159	RBMX;RBMXL2;RBMXL3	RBMX	RBMX	RNA binding motif protein, X-linked	Xq26.3	62	54	57	59	50	47	49	44	57	55	54	59	58.5921	50.8274	51.2184	53.2243	48.2237	45.4811	59.017	54.1444	57.1521	57.6593	54.6239	58.7018	1.10967	-1.10967	0.200895	0.529704
980	P08865	P08865	RPSA	RPSA	RPSA	ribosomal protein SA	3p22.1	57	64	53	53	52	48	42	37	60	57	61	61	53.8669	60.2398	47.6241	47.8116	50.1526	46.4488	50.586	45.5305	60.1601	59.756	61.7048	60.6917	1.10546	-1.10546	0.179356	0.498249
1408	P27824;P27824-2;P27824-3	P27824	CANX	CANX	CANX	calnexin	5q35.3	54	63	51	50	62	59	49	48	41	53	60	52	51.0318	59.2986	45.827	45.1053	59.7974	57.0933	59.017	59.0666	41.1094	55.5626	60.6932	51.7372	1.02839	-1.02839	0.755242	0.920855
2526	Q13153;Q13153-2	Q13153	PAK1	PAK1	PAK1	p21 (RAC1) activated kinase 1	11q13.5-q14.1	1	0	3	3	0	0	0	0	0	0	0	0	0.945033	0	2.6957	2.70632	0	0	0	0	0	0	0	0	-10000	10000	0.0201842	0.161884
1942	P53621;P53621-2	P53621	COPA	COPA	COPA	coatomer protein complex subunit alpha	1q23.2	67	50	76	56	57	61	49	56	44	30	41	51	63.3172	47.0624	68.2912	50.5179	54.975	59.0287	59.017	68.911	44.1174	31.4505	41.4737	50.7422	-1.16056	1.16056	0.138983	0.430446
1084	P12429	P12429	ANXA3	ANXA3	ANXA3	annexin A3	4q21.21	56	54	64	64	43	40	35	28	63	63	61	64	52.9219	50.8274	57.5084	57.7348	41.4724	38.7073	42.155	34.4555	63.1681	66.0461	61.7048	63.6765	1.10708	-1.10708	0.347579	0.658764
3339	Q6ZV89-2;Q6ZV89	Q6ZV89-2	SH2D5	SH2D5	SH2D5	SH2 domain containing 5	1p36.12	2	1	1	1	1	1	0	0	0	0	0	0	1.89007	0.941247	0.898568	0.902106	0.964474	0.967684	0	0	0	0	0	0	-10000	10000	0.00317071	0.0548756
4545	Q9BRK4	Q9BRK4	LZTS2	LZTS2	LZTS2	leucine zipper tumor suppressor 2	10q24.31	1	0	1	3	1	1	0	0	0	0	0	0	0.945033	0	0.898568	2.70632	0.964474	0.967684	0	0	0	0	0	0	-10000	10000	0.00358449	0.0590661
5770	Q9Y3D2	Q9Y3D2	MSRB2	MSRB2	MSRB2	methionine sulfoxide reductase B2	10p12.2	1	0	2	2	1	1	0	0	0	0	0	0	0.945033	0	1.79714	1.80421	0.964474	0.967684	0	0	0	0	0	0	-10000	10000	0.00334183	0.0562549
1941	P53618	P53618	COPB1	COPB1	COPB1	coatomer protein complex subunit beta 1	11p15.2	50	59	58	76	58	58	34	40	50	49	48	48	47.2517	55.5336	52.117	68.5601	55.9395	56.1257	40.9506	49.2222	50.1334	51.3692	48.5546	47.7574	-1.16508	1.16508	0.0691366	0.311905
2131	P62280	P62280	RPS11	RPS11	RPS11	ribosomal protein S11	19q13.3	56	46	50	62	51	51	42	39	55	49	63	59	52.9219	43.2974	44.9284	55.9306	49.1882	49.3519	50.586	47.9916	55.1468	51.3692	63.7279	58.7018	1.10793	-1.10793	0.190221	0.517664
1716	P46777	P46777	RPL5	RPL5	RPL5	ribosomal protein L5	1p22.1	62	52	52	51	51	53	42	36	58	55	54	55	58.5921	48.9449	46.7255	46.0074	49.1882	51.2872	50.586	44.2999	58.1548	57.6593	54.6239	54.722	1.06418	-1.06418	0.401404	0.700948
127	O00255-3;O00255-2;O00255	O00255-3	MEN1	MEN1	MEN1	menin 1	11q13	3	2	0	0	1	0	0	0	0	0	0	0	2.8351	1.88249	0	0	0.964474	0	0	0	0	0	0	0	-10000	10000	0.0218319	0.168645
1306	P22392-2	P22392-2	NME2	NME2	NME2	NME/NM23 nucleoside diphosphate kinase 2	17q21.33	63	48	53	56	65	59	45	38	49	39	45	57	59.5371	45.1799	47.6241	50.5179	62.6908	57.0933	54.1993	46.7611	49.1308	40.8857	45.5199	56.7119	-1.10039	1.10039	0.262285	0.574633
234	O14832-2;O14832	O14832-2	PHYH	PHYH	PHYH	phytanoyl-CoA 2-hydroxylase	10p13	1	1	1	1	1	1	0	0	0	0	0	0	0.945033	0.941247	0.898568	0.902106	0.964474	0.967684	0	0	0	0	0	0	-10000	10000	0.00602391	0.0817746
472	O60664;O60664-4;O60664-3;O60664-2	O60664	PLIN3	PLIN3	PLIN3	perilipin 3	19p13.3	48	51	72	70	50	50	35	43	52	45	46	49	45.3616	48.0036	64.6969	63.1474	48.2237	48.3842	42.155	52.9138	52.1388	47.1758	46.5315	48.7523	-1.09718	1.09718	0.257434	0.574633
1454	P30041	P30041	PRDX6	PRDX6	PRDX6	peroxiredoxin 6	1q25.1	52	51	63	57	57	51	48	54	45	45	45	43	49.1417	48.0036	56.6098	51.42	54.975	49.3519	57.8125	66.4499	45.1201	47.1758	45.5199	42.7827	-1.01522	1.01522	0.724603	0.90433
573	O75533;O75533-2	O75533	SF3B1	SF3B1	SF3B1	splicing factor 3b subunit 1	2q33.1	66	56	50	34	45	54	43	49	58	36	63	56	62.3722	52.7098	44.9284	30.6716	43.4013	52.2549	51.7904	60.2971	58.1548	37.7407	63.7279	55.7169	1.1435	-1.1435	0.210678	0.540955
2199	P63241;P63241-2;Q6IS14;Q9GZV4	P63241	EIF5A;EIF5AL1;EIF5A2	EIF5A	EIF5A	eukaryotic translation initiation factor 5A	17p13.1	57	58	58	51	55	54	41	28	59	39	52	58	53.8669	54.5923	52.117	46.0074	53.0461	52.2549	49.3815	34.4555	59.1575	40.8857	52.6008	57.7068	-1.06015	1.06015	0.567751	0.826289
2522	Q13137-4;Q13137-5;Q13137;Q13137-3;Q13137-2	Q13137-4	CALCOCO2	CALCOCO2	CALCOCO2	calcium binding and coiled-coil domain 2	17q21.32	0	0	2	1	1	2	0	0	0	0	0	0	0	0	1.79714	0.902106	0.964474	1.93537	0	0	0	0	0	0	-10000	10000	0.00691234	0.0864199
4571	Q9BSJ8;Q9BSJ8-2	Q9BSJ8	ESYT1	ESYT1	ESYT1	extended synaptotagmin 1	12q13.2	54	62	42	36	57	67	37	37	50	61	48	56	51.0318	58.3573	37.7399	32.4758	54.975	64.8348	44.5638	45.5305	50.1334	63.9494	48.5546	55.7169	1.03017	-1.03017	0.679531	0.879182
2661	Q14146	Q14146	URB2	URB2	URB2	URB2 ribosome biogenesis 2 homolog (S. cerevisiae)	1q42.13	4	1	0	1	0	0	0	0	0	0	0	0	3.78013	0.941247	0	0.902106	0	0	0	0	0	0	0	0	-10000	10000	0.0289636	0.19639
2917	Q16531;Q16531-2	Q16531	DDB1	DDB1	DDB1	damage specific DNA binding protein 1	11q12.2	45	55	51	48	59	59	41	43	49	66	36	53	42.5265	51.7686	45.827	43.3011	56.904	57.0933	49.3815	52.9138	49.1308	69.1912	36.4159	52.7321	1.04151	-1.04151	0.667617	0.870978
4436	Q99439;Q99439-2	Q99439	CNN2	CNN2	CNN2	calponin 2	19p13.3	62	63	57	51	39	40	32	28	66	59	54	54	58.5921	59.2986	51.2184	46.0074	37.6145	38.7073	38.5417	34.4555	66.1761	61.8527	54.6239	53.727	1.06155	-1.06155	0.582313	0.833949
1976	P55060-3;P55060;P55060-4;P55060-2	P55060-3	CSE1L	CSE1L	CSE1L	chromosome segregation 1 like	20q13.13	61	51	51	53	54	61	32	33	61	46	51	48	57.647	48.0036	45.827	47.8116	52.0816	59.0287	38.5417	40.6083	61.1628	48.2242	51.5892	47.7574	-1.07821	1.07821	0.452666	0.743249
3001	Q3T906;Q3T906-2	Q3T906	GNPTAB	GNPTAB	GNPTAB	N-acetylglucosamine-1-phosphate transferase alpha and beta subunits	12q23.2	0	0	3	1	1	1	0	0	0	0	0	0	0	0	2.6957	0.902106	0.964474	0.967684	0	0	0	0	0	0	-10000	10000	0.00901864	0.101485
1390	P27348	P27348	YWHAQ	YWHAQ	YWHAQ	tyrosine 3-monooxygenase/tryptophan 5-monooxygenase activation protein theta	2p25.1	50	52	46	49	51	54	41	45	50	53	55	53	47.2517	48.9449	41.3341	44.2032	49.1882	52.2549	49.3815	55.3749	50.1334	55.5626	55.6354	52.7321	1.12587	-1.12587	0.151745	0.450848
1565	P35606-2;P35606	P35606-2	COPB2	COPB2	COPB2	coatomer protein complex subunit beta 2	3q23	49	55	58	63	46	50	46	45	54	42	46	42	46.3066	51.7686	52.117	56.8327	44.3658	48.3842	55.4037	55.3749	54.1441	44.0308	46.5315	41.7877	-1.00842	1.00842	0.843719	0.954181
1731	P47756-2;P47756	P47756-2	CAPZB	CAPZB	CAPZB	capping actin protein of muscle Z-line beta subunit	1p36.13	60	58	55	55	52	50	42	38	50	45	43	47	56.702	54.5923	49.4213	49.6158	50.1526	48.3842	50.586	46.7611	50.1334	47.1758	43.4968	46.7624	-1.08407	1.08407	0.336557	0.653783
1588	P36578	P36578	RPL4	RPL4	RPL4	ribosomal protein L4	15q22.31	40	43	57	50	47	52	33	32	54	61	64	61	37.8013	40.4736	51.2184	45.1053	45.3303	50.3196	39.7461	39.3777	54.1441	63.9494	64.7394	60.6917	1.1939	-1.1939	0.0576078	0.289097
3262	Q6P2Q9	Q6P2Q9	PRPF8	PRPF8	PRPF8	pre-mRNA processing factor 8	17p13.3	58	56	55	56	42	46	46	34	43	47	58	53	54.8119	52.7098	49.4213	50.5179	40.5079	44.5135	55.4037	41.8388	43.1148	49.2725	58.6701	52.7321	1.02923	-1.02923	0.726857	0.906313
142	O00410;O00410-3;O00410-2	O00410	IPO5	IPO5	IPO5	importin 5	13q32.2	49	58	48	49	50	54	38	32	55	54	49	57	46.3066	54.5923	43.1313	44.2032	48.2237	52.2549	45.7683	39.3777	55.1468	56.611	49.5661	56.7119	1.05012	-1.05012	0.48515	0.762236
3650	Q8N1I0-2;Q8N1I0;Q8N1I0-3;Q8N1I0-4	Q8N1I0-2	DOCK4	DOCK4	DOCK4	dedicator of cytokinesis 4	7q31.1	0	0	3	2	1	0	0	0	0	0	0	0	0	0	2.6957	1.80421	0.964474	0	0	0	0	0	0	0	-10000	10000	0.0205661	0.163178
3484	Q86VP6;Q86VP6-2;Q86VP6-3;O75155-2;O75155	Q86VP6	CAND1;CAND2	CAND1	CAND1	cullin associated and neddylation dissociated 1	12q14.3-q15	23	60	44	42	56	57	40	73	51	52	39	53	21.7358	56.4748	39.537	37.8885	54.0105	55.158	48.1771	89.8304	51.1361	54.5143	39.4506	52.7321	1.26826	-1.26826	0.154747	0.45547
910	P06748-2;P06748;P06748-3	P06748-2	NPM1	NPM1	NPM1	nucleophosmin 1	5q35.1	58	59	45	41	49	49	48	40	52	54	50	44	54.8119	55.5336	40.4356	36.9864	47.2592	47.4165	57.8125	49.2222	52.1388	56.611	50.5777	43.7776	1.09806	-1.09806	0.269771	0.582339
1545	P35221;P35221-2;P35221-3;P26232-4;P26232-6	P35221	CTNNA1;CTNNA2	CTNNA1	CTNNA1	catenin alpha 1	5q31.2	50	56	46	52	50	51	40	32	57	48	54	53	47.2517	52.7098	41.3341	46.9095	48.2237	49.3519	48.1771	39.3777	57.1521	50.3209	54.6239	52.7321	1.0581	-1.0581	0.441038	0.732298
1508	P31946	P31946	YWHAB	YWHAB	YWHAB	tyrosine 3-monooxygenase/tryptophan 5-monooxygenase activation protein beta	20q13.12	57	54	52	51	50	49	46	38	46	49	48	48	53.8669	50.8274	46.7255	46.0074	48.2237	47.4165	55.4037	46.7611	46.1228	51.3692	48.5546	47.7574	1.0099	-1.0099	0.922733	0.971735
4446	Q99497	Q99497	PARK7	PARK7	PARK7	Parkinsonism associated deglycase	1p36.23	55	47	58	58	51	52	46	40	48	48	38	43	51.9768	44.2386	52.117	52.3222	49.1882	50.3196	55.4037	49.2222	48.1281	50.3209	38.439	42.7827	-1.05581	1.05581	0.472848	0.758586
3692	Q8N5A5-3;Q8N5A5-2;Q8N5A5;Q8N5A5-4	Q8N5A5-3	ZGPAT	ZGPAT	ZGPAT	zinc finger CCCH-type and G-patch domain containing	20q13.33	0	1	1	1	2	1	0	0	0	0	0	0	0	0.941247	0.898568	0.902106	1.92895	0.967684	0	0	0	0	0	0	-10000	10000	0.00639778	0.0837797
5894	Q9Y678	Q9Y678	COPG1	COPG1	COPG1	coatomer protein complex subunit gamma 1	3q21.3	45	47	56	63	59	53	42	40	47	47	44	39	42.5265	44.2386	50.3198	56.8327	56.904	51.2872	50.586	49.2222	47.1254	49.2725	44.5083	38.8029	-1.08082	1.08082	0.335675	0.652847
2185	P63010;P63010-2;P63010-3	P63010	AP2B1	AP2B1	AP2B1	adaptor related protein complex 2 beta 1 subunit	17q12	51	52	59	64	46	52	42	48	46	39	41	40	48.1967	48.9449	53.0155	57.7348	44.3658	50.3196	50.586	59.0666	46.1228	40.8857	41.4737	39.7978	-1.08867	1.08867	0.2573	0.574633
1843	P50570-2;P50570-3;P50570;P50570-5;P50570-4	P50570-2	DNM2	DNM2	DNM2	dynamin 2	19p13.2	48	56	58	63	46	55	53	55	42	38	37	28	45.3616	52.7098	52.117	56.8327	44.3658	53.2226	63.8347	67.6805	42.1121	39.8374	37.4275	27.8585	-1.09277	1.09277	0.325854	0.641626
5481	Q9UHD8;Q9UHD8-7;Q9UHD8-2;Q9UHD8-5;Q9UHD8-3;Q9UHD8-4;Q9UHD8-9;Q9UHD8-8	Q9UHD8	SEPT9	SEPT9	SEPT9	septin 9	17q25.3	55	57	59	46	48	44	44	44	39	46	48	49	51.9768	53.6511	53.0155	41.4969	46.2947	42.5781	52.9948	54.1444	39.1041	48.2242	48.5546	48.7523	1.00955	-1.00955	0.970918	0.986925
2774	Q15019;Q15019-2;Q15019-3	Q15019	SEPT2	SEPT2	SEPT2	septin 2	2q37.3	59	68	51	52	46	47	33	29	47	46	46	51	55.757	64.0048	45.827	46.9095	44.3658	45.4811	39.7461	35.6861	47.1254	48.2242	46.5315	50.7422	-1.12792	1.12792	0.200491	0.529704
1014	P09936	P09936	UCHL1	UCHL1	UCHL1	ubiquitin C-terminal hydrolase L1	4p13	51	50	39	43	56	53	40	38	53	45	49	57	48.1967	47.0624	35.0442	38.7906	54.0105	51.2872	48.1771	46.7611	53.1414	47.1758	49.5661	56.7119	1.09892	-1.09892	0.232907	0.558435
3731	Q8N9V3-2;Q8N9V3	Q8N9V3-2	WDSUB1	WDSUB1	WDSUB1	WD repeat, sterile alpha motif and U-box domain containing 1	2q24.2	0	1	0	1	2	2	0	0	0	0	0	0	0	0.941247	0	0.902106	1.92895	1.93537	0	0	0	0	0	0	-10000	10000	0.00700167	0.0868823
3903	Q8WTS1	Q8WTS1	ABHD5	ABHD5	ABHD5	abhydrolase domain containing 5	3p21.33	1	0	3	2	0	0	0	0	0	0	0	0	0.945033	0	2.6957	1.80421	0	0	0	0	0	0	0	0	-10000	10000	0.0204509	0.162506
3929	Q8WV24	Q8WV24	PHLDA1	PHLDA1	PHLDA1	pleckstrin homology like domain family A member 1	12q15	1	0	1	1	2	1	0	0	0	0	0	0	0.945033	0	0.898568	0.902106	1.92895	0.967684	0	0	0	0	0	0	-10000	10000	0.00639778	0.0837797
1385	P26641;P26641-2	P26641	EEF1G	EEF1G	EEF1G	eukaryotic translation elongation factor 1 gamma	11q12.3	44	48	51	51	48	47	43	45	42	47	51	46	41.5815	45.1799	45.827	46.0074	46.2947	45.4811	51.7904	55.3749	42.1121	49.2725	51.5892	45.7675	1.09444	-1.09444	0.331744	0.648693
2962	Q16891-2;Q16891;Q16891-3	Q16891-2	IMMT	IMMT	IMMT	inner membrane mitochondrial protein	2p11.2	44	46	41	44	54	51	55	50	51	39	43	43	41.5815	43.2974	36.8413	39.6927	52.0816	49.3519	66.2435	61.5277	51.1361	40.8857	43.4968	42.7827	1.16445	-1.16445	0.131298	0.415145
5833	Q9Y520-4;Q9Y520-5;Q9Y520;Q9Y520-7;Q9Y520-6;Q9Y520-2;Q9Y520-3	Q9Y520-4	PRRC2C	PRRC2C	PRRC2C	proline rich coiled-coil 2C	1q24.3	52	52	57	53	42	44	33	38	45	47	48	48	49.1417	48.9449	51.2184	47.8116	40.5079	42.5781	39.7461	46.7611	45.1201	49.2725	48.5546	47.7574	-1.01079	1.01079	0.915426	0.971735
2569	Q13435	Q13435	SF3B2	SF3B2	SF3B2	splicing factor 3b subunit 2	11q13.1	42	50	48	47	51	51	43	43	47	50	41	44	39.6914	47.0624	43.1313	42.399	49.1882	49.3519	51.7904	52.9138	47.1254	52.4176	41.4737	43.7776	1.06895	-1.06895	0.476063	0.760956
3950	Q8WWB7-2;Q8WWB7	Q8WWB7-2	GLMP	GLMP	GLMP	glycosylated lysosomal membrane protein	1q22	0	1	1	1	2	1	0	0	0	0	0	0	0	0.941247	0.898568	0.902106	1.92895	0.967684	0	0	0	0	0	0	-10000	10000	0.00639778	0.0837797
2210	P68032;P68133;P63267;P62736;P63267-2	P68032	ACTC1;ACTA1;ACTG2;ACTA2	ACTC1	ACTC1	actin, alpha, cardiac muscle 1	15q14	47	57	58	60	47	50	20	18	44	46	47	61	44.4166	53.6511	52.117	54.1264	45.3303	48.3842	24.0886	22.15	44.1174	48.2242	47.543	60.6917	-1.20749	1.20749	0.130907	0.414573
1067	P11413;P11413-2;P11413-3	P11413	G6PD	G6PD	G6PD	glucose-6-phosphate dehydrogenase	Xq28	29	31	45	53	54	57	58	54	45	41	41	44	27.406	29.1787	40.4356	47.8116	52.0816	55.158	69.8568	66.4499	45.1201	42.9824	41.4737	43.7776	1.22846	-1.22846	0.155611	0.457331
1636	P40939;P40939-2	P40939	HADHA	HADHA	HADHA	hydroxyacyl-CoA dehydrogenase trifunctional multienzyme complex subunit alpha	2p23.3	40	49	38	41	46	43	65	72	35	46	39	38	37.8013	46.1211	34.1456	36.9864	44.3658	41.6104	78.2878	88.5999	35.0934	48.2242	39.4506	37.8079	1.3586	-1.3586	0.15055	0.449766
2713	Q14573	Q14573	ITPR3	ITPR3	ITPR3	inositol 1,4,5-trisphosphate receptor type 3	6p21.31	68	67	43	46	52	53	58	48	30	26	29	29	64.2623	63.0636	38.6384	41.4969	50.1526	51.2872	69.8568	59.0666	30.0801	27.2571	29.335	28.8534	-1.26366	1.26366	0.116509	0.392721
3966	Q8WXG6-6;Q8WXG6-8;Q8WXG6-5;Q8WXG6-4;Q8WXG6-7;Q8WXG6-3;Q8WXG6-2;Q8WXG6	Q8WXG6-6	MADD	MADD	MADD	MAP kinase activating death domain	11p11.2	0	1	2	2	1	0	0	0	0	0	0	0	0	0.941247	1.79714	1.80421	0.964474	0	0	0	0	0	0	0	-10000	10000	0.0068589	0.0860352
4076	Q93063;Q93063-2;Q93063-3	Q93063	EXT2	EXT2	EXT2	exostosin glycosyltransferase 2	11p11.2	0	1	3	2	0	0	0	0	0	0	0	0	0	0.941247	2.6957	1.80421	0	0	0	0	0	0	0	0	-10000	10000	0.020428	0.162506
4222	Q96F24-2;Q96F24-3;Q96F24	Q96F24-2	NRBF2	NRBF2	NRBF2	nuclear receptor binding factor 2	10q21.3	1	0	2	2	1	0	0	0	0	0	0	0	0.945033	0	1.79714	1.80421	0.964474	0	0	0	0	0	0	0	-10000	10000	0.00686073	0.0860352
1648	P41250	P41250	GARS	GARS	GARS	glycyl-tRNA synthetase	7p14.3	48	47	83	89	33	30	30	37	33	40	40	35	45.3616	44.2386	74.5812	80.2874	31.8276	29.0305	36.1328	45.5305	33.0881	41.9341	40.4621	34.8231	-1.31623	1.31623	0.225579	0.550764
2904	Q15942;Q15942-2	Q15942	ZYX	ZYX	ZYX	zyxin	7q34	48	48	49	45	37	37	29	34	44	47	56	66	45.3616	45.1799	44.0298	40.5948	35.6855	35.8043	34.9284	41.8388	44.1174	49.2725	56.647	65.6664	1.18574	-1.18574	0.0787872	0.32492
457	O60506;O60506-2	O60506	SYNCRIP	SYNCRIP	SYNCRIP	synaptotagmin binding cytoplasmic RNA interacting protein	6q14.3	60	57	37	32	34	44	34	31	49	55	57	46	56.702	53.6511	33.247	28.8674	32.7921	42.5781	40.9506	38.1472	49.1308	57.6593	57.6585	45.7675	1.16735	-1.16735	0.174911	0.492529
2648	Q14008-2;Q14008;Q14008-3	Q14008-2	CKAP5	CKAP5	CKAP5	cytoskeleton associated protein 5	11p11.2	54	47	58	50	40	47	35	22	43	41	54	45	51.0318	44.2386	52.117	45.1053	38.579	45.4811	42.155	27.0722	43.1148	42.9824	54.6239	44.7725	-1.08571	1.08571	0.413717	0.712895
4341	Q96N06;Q96N06-2	Q96N06	SPATA33	SPATA33	SPATA33	spermatogenesis associated 33	16q24.3	1	0	1	1	2	1	0	0	0	0	0	0	0.945033	0	0.898568	0.902106	1.92895	0.967684	0	0	0	0	0	0	-10000	10000	0.00639778	0.0837797
4581	Q9BT30	Q9BT30	ALKBH7	ALKBH7	ALKBH7	alkB homolog 7	19p13.3	0	1	2	2	1	0	0	0	0	0	0	0	0	0.941247	1.79714	1.80421	0.964474	0	0	0	0	0	0	0	-10000	10000	0.0068589	0.0860352
2677	Q14192	Q14192	FHL2	FHL2	FHL2	four and a half LIM domains 2	2q12.2	48	45	42	41	51	45	27	25	54	53	52	49	45.3616	42.3561	37.7399	36.9864	49.1882	43.5458	32.5196	30.7639	54.1441	55.5626	52.6008	48.7523	1.07511	-1.07511	0.365418	0.670529
5595	Q9ULQ0-2;Q9ULQ0	Q9ULQ0-2	STRIP2	STRIP2	STRIP2	striatin interacting protein 2	7q32.1	1	1	1	1	1	1	0	0	0	0	0	0	0.945033	0.941247	0.898568	0.902106	0.964474	0.967684	0	0	0	0	0	0	-10000	10000	0.00602391	0.0817746
5841	Q9Y597-2;Q9Y597;Q9Y597-3	Q9Y597-2	KCTD3	KCTD3	KCTD3	potassium channel tetramerization domain containing 3	1q41	1	0	0	2	2	1	0	0	0	0	0	0	0.945033	0	0	1.80421	1.92895	0.967684	0	0	0	0	0	0	-10000	10000	0.00694823	0.0865822
1654	P42166;P42167-3	P42166	TMPO	TMPO	TMPO	thymopoietin	12q23.1	50	50	36	40	54	52	30	31	47	40	49	50	47.2517	47.0624	32.3485	36.0842	52.0816	50.3196	36.1328	38.1472	47.1254	41.9341	49.5661	49.7473	-1.0095	1.0095	0.957517	0.982363
2090	P61586	P61586	RHOA	RHOA	RHOA	ras homolog family member A	3p21.31	48	48	53	46	49	48	34	31	41	45	43	43	45.3616	45.1799	47.6241	41.4969	47.2592	46.4488	40.9506	38.1472	41.1094	47.1758	43.4968	42.7827	-1.07769	1.07769	0.428602	0.71903
1726	P46939;P46939-2;P46939-4;P46939-3	P46939	UTRN	UTRN	UTRN	utrophin	6q24.2	48	42	27	28	55	62	59	56	35	44	39	33	45.3616	39.5324	24.2613	25.259	53.0461	59.9964	71.0612	68.911	35.0934	46.1275	39.4506	32.8332	1.18597	-1.18597	0.365988	0.670529
39	B2RUZ4	B2RUZ4	SMIM1	SMIM1	SMIM1	small integral membrane protein 1 (Vel blood group)	1p36.32	0	0	1	2	1	1	0	0	0	0	0	0	0	0	0.898568	1.80421	0.964474	0.967684	0	0	0	0	0	0	-10000	10000	0.0130866	0.126207
417	O43826;O43826-2	O43826	SLC37A4	SLC37A4	SLC37A4	solute carrier family 37 member 4	11q23.3	1	0	1	1	1	1	0	0	0	0	0	0	0.945033	0	0.898568	0.902106	0.964474	0.967684	0	0	0	0	0	0	-10000	10000	0.0121699	0.123045
1605	P37837	P37837	TALDO1	TALDO1	TALDO1	transaldolase 1	11p15.5	46	41	47	50	44	51	46	45	37	40	38	36	43.4715	38.5911	42.2327	45.1053	42.4369	49.3519	55.4037	55.3749	37.0987	41.9341	38.439	35.818	1.01102	-1.01102	0.95987	0.983701
2780	Q15029-2;Q15029;Q15029-3	Q15029-2	EFTUD2	EFTUD2	EFTUD2	elongation factor Tu GTP binding domain containing 2	17q21.31	42	53	48	47	40	47	33	32	47	44	43	45	39.6914	49.8861	43.1313	42.399	38.579	45.4811	39.7461	39.3777	47.1254	46.1275	43.4968	44.7725	1.0057	-1.0057	0.906704	0.970229
4053	Q92900-2;Q92900	Q92900-2	UPF1	UPF1	UPF1	UPF1, RNA helicase and ATPase	19p13.11	31	59	62	37	42	37	33	45	37	47	40	51	29.296	55.5336	55.7112	33.3779	40.5079	35.8043	39.7461	55.3749	37.0987	49.2725	40.4621	50.7422	1.08978	-1.08978	0.440873	0.732298
2002	P55884;P55884-2	P55884	EIF3B	EIF3B	EIF3B	eukaryotic translation initiation factor 3 subunit B	7p22.3	49	43	44	48	47	46	36	41	41	38	48	39	46.3066	40.4736	39.537	43.3011	45.3303	44.5135	43.3594	50.4527	41.1094	39.8374	48.5546	38.8029	1.01023	-1.01023	0.941397	0.97631
4429	Q96TA1-2;Q96TA1	Q96TA1-2	FAM129B	FAM129B	FAM129B	family with sequence similarity 129 member B	9q34.11	45	55	46	52	51	48	38	39	39	38	35	33	42.5265	51.7686	41.3341	46.9095	49.1882	46.4488	45.7683	47.9916	39.1041	39.8374	35.4044	32.8332	-1.15455	1.15455	0.0930526	0.351262
944	P07942	P07942	LAMB1	LAMB1	LAMB1	laminin subunit beta 1	7q31.1	50	47	33	38	49	50	39	36	43	43	42	48	47.2517	44.2386	29.6528	34.28	47.2592	48.3842	46.9727	44.2999	43.1148	45.0791	42.4852	47.7574	1.07425	-1.07425	0.399363	0.698531
1747	P48444;P48444-2	P48444	ARCN1	ARCN1	ARCN1	archain 1	11q23.3	38	42	53	52	43	42	34	36	38	46	45	49	35.9113	39.5324	47.6241	46.9095	41.4724	40.6427	40.9506	44.2999	38.1014	48.2242	45.5199	48.7523	1.05457	-1.05457	0.561097	0.824921
1784	P49411	P49411	TUFM	TUFM	TUFM	Tu translation elongation factor, mitochondrial	16p11.2	51	46	56	47	35	36	43	41	40	42	36	45	48.1967	43.2974	50.3198	42.399	33.7566	34.8366	51.7904	50.4527	40.1067	44.0308	36.4159	44.7725	1.0584	-1.0584	0.613664	0.839281
2667	Q14157;Q14157-5;Q14157-3	Q14157	UBAP2L	UBAP2L	UBAP2L	ubiquitin associated protein 2 like	1q21.3	43	50	41	38	52	59	33	38	43	36	39	42	40.6364	47.0624	36.8413	34.28	50.1526	57.0933	39.7461	46.7611	43.1148	37.7407	39.4506	41.7877	-1.07025	1.07025	0.479045	0.762236
868	P04843	P04843	RPN1	RPN1	RPN1	ribophorin I	3q21.3	50	48	47	43	40	45	45	34	46	46	42	27	47.2517	45.1799	42.2327	38.7906	38.579	43.5458	54.1993	41.8388	46.1228	48.2242	42.4852	26.8635	1.01625	-1.01625	0.928233	0.973239
2680	Q14203-3;Q14203-4;Q14203-6;Q14203;Q14203-5;Q14203-2	Q14203-3	DCTN1	DCTN1	DCTN1	dynactin subunit 1	2p13.1	59	47	38	37	50	51	42	40	44	24	43	38	55.757	44.2386	34.1456	33.3779	48.2237	49.3519	50.586	49.2222	44.1174	25.1604	43.4968	37.8079	-1.05872	1.05872	0.594877	0.838285
503	O75054;O75054-2	O75054	IGSF3	IGSF3	IGSF3	immunoglobulin superfamily member 3	1p13.1	1	1	0	0	1	2	0	0	0	0	0	0	0.945033	0.941247	0	0	0.964474	1.93537	0	0	0	0	0	0	-10000	10000	0.0130866	0.126207
4462	Q99613-2;Q99613;B5ME19	Q99613-2	EIF3C;EIF3CL	EIF3C	EIF3C	eukaryotic translation initiation factor 3 subunit C	16p11.2	42	47	45	49	45	44	32	31	39	50	43	42	39.6914	44.2386	40.4356	44.2032	43.4013	42.5781	38.5417	38.1472	39.1041	52.4176	43.4968	41.7877	-1.00415	1.00415	0.99436	0.996549
1763	P48735;P48735-2	P48735	IDH2	IDH2	IDH2	isocitrate dehydrogenase (NADP(+)) 2, mitochondrial	15q26.1	51	44	52	42	46	53	45	39	36	33	33	34	48.1967	41.4149	46.7255	37.8885	44.3658	51.2872	54.1993	47.9916	36.0961	34.5956	33.3813	33.8281	-1.12406	1.12406	0.152993	0.451655
1242	P19367;P19367-4;P19367-2;P19367-3	P19367	HK1	HK1	HK1	hexokinase 1	10q22.1	43	38	38	43	52	54	43	43	39	39	37	35	40.6364	35.7674	34.1456	38.7906	50.1526	52.2549	51.7904	52.9138	39.1041	40.8857	37.4275	34.8231	1.02064	-1.02064	0.903251	0.968097
2545	Q13283;Q13283-2	Q13283	G3BP1	G3BP1	G3BP1	G3BP stress granule assembly factor 1	5q33.1	46	50	47	43	36	34	23	28	49	46	51	51	43.4715	47.0624	42.2327	38.7906	34.7211	32.9012	27.7018	34.4555	49.1308	48.2242	51.5892	50.7422	1.09476	-1.09476	0.291494	0.607305
4440	Q99460;Q99460-2	Q99460	PSMD1	PSMD1	PSMD1	proteasome 26S subunit, non-ATPase 1	2q37.1	39	47	45	40	44	49	37	42	37	43	41	37	36.8563	44.2386	40.4356	36.0842	42.4369	47.4165	44.5638	51.6833	37.0987	45.0791	41.4737	36.813	1.03735	-1.03735	0.745234	0.915723
814	P00505;P00505-2	P00505	GOT2	GOT2	GOT2	glutamic-oxaloacetic transaminase 2	16q21	47	50	52	57	34	40	30	39	36	44	35	35	44.4166	47.0624	46.7255	51.42	32.7921	38.7073	36.1328	47.9916	36.0961	46.1275	35.4044	34.8231	-1.10377	1.10377	0.247555	0.574633
555	O75427	O75427	LRCH4	LRCH4	LRCH4	leucine rich repeats and calponin homology domain containing 4	7q22.1	1	0	2	0	1	1	0	0	0	0	0	0	0.945033	0	1.79714	0	0.964474	0.967684	0	0	0	0	0	0	-10000	10000	0.0130866	0.126207
1956	P54136;P54136-2	P54136	RARS	RARS	RARS	arginyl-tRNA synthetase	5q34	48	41	44	39	41	43	45	39	34	43	41	41	45.3616	38.5911	39.537	35.1821	39.5434	41.6104	54.1993	47.9916	34.0907	45.0791	41.4737	40.7928	1.09924	-1.09924	0.354344	0.663933
2091	P61587	P61587	RND3	RND3	RND3	Rho family GTPase 3	2q23.3	0	0	1	1	1	2	0	0	0	0	0	0	0	0	0.898568	0.902106	0.964474	1.93537	0	0	0	0	0	0	-10000	10000	0.0130866	0.126207
2148	P62699	P62699	YPEL5	YPEL5	YPEL5	yippee like 5	2p23.1	1	0	0	2	1	1	0	0	0	0	0	0	0.945033	0	0	1.80421	0.964474	0.967684	0	0	0	0	0	0	-10000	10000	0.0130866	0.126207
2671	Q14164-2;Q14164	Q14164-2	IKBKE	IKBKE	IKBKE	inhibitor of nuclear factor kappa B kinase subunit epsilon	1q32.1	1	1	1	2	0	0	0	0	0	0	0	0	0.945033	0.941247	0.898568	1.80421	0	0	0	0	0	0	0	0	-10000	10000	0.0130866	0.126207
1383	P26639;P26639-2;A2RTX5-2;A2RTX5	P26639	TARS;TARSL2	TARS	TARS	threonyl-tRNA synthetase	5p13.3	37	43	41	35	49	46	31	30	48	49	39	45	34.9662	40.4736	36.8413	31.5737	47.2592	44.5135	37.3373	36.9166	48.1281	51.3692	39.4506	44.7725	1.09484	-1.09484	0.279163	0.593308
1649	P41252	P41252	IARS	IARS	IARS	isoleucyl-tRNA synthetase	9q22.31	61	51	51	43	39	40	32	33	36	29	38	40	57.647	48.0036	45.827	38.7906	37.6145	38.7073	38.5417	40.6083	36.0961	30.4022	38.439	39.7978	-1.19074	1.19074	0.0599332	0.295867
1467	P30153	P30153	PPP2R1A	PPP2R1A	PPP2R1A	protein phosphatase 2 scaffold subunit Aalpha	19q13.41	39	50	49	50	41	39	25	30	39	39	42	49	36.8563	47.0624	44.0298	45.1053	39.5434	37.7397	30.1107	36.9166	39.1041	40.8857	42.4852	48.7523	-1.05071	1.05071	0.649944	0.857561
2787	Q15052-2;Q15052	Q15052-2	ARHGEF6	ARHGEF6	ARHGEF6	Rac/Cdc42 guanine nucleotide exchange factor 6	Xq26.3	0	0	2	1	1	1	0	0	0	0	0	0	0	0	1.79714	0.902106	0.964474	0.967684	0	0	0	0	0	0	-10000	10000	0.0130866	0.126207
2947	Q16773-2;Q16773	Q16773-2	KYAT1	KYAT1	KYAT1	kynurenine aminotransferase 1	9q34.11	2	0	1	2	0	0	0	0	0	0	0	0	1.89007	0	0.898568	1.80421	0	0	0	0	0	0	0	0	-10000	10000	0.0188329	0.156123
1110	P13797;P13797-3;P13797-2	P13797	PLS3	PLS3	PLS3	plastin 3	Xq23	42	44	48	51	33	37	34	40	42	40	41	36	39.6914	41.4149	43.1313	46.0074	31.8276	35.8043	40.9506	49.2222	42.1121	41.9341	41.4737	35.818	1.05731	-1.05731	0.607176	0.839281
1121	P14314-2;P14314	P14314-2	PRKCSH	PRKCSH	PRKCSH	protein kinase C substrate 80K-H	19p13.2	44	44	45	48	36	39	42	36	39	39	34	42	41.5815	41.4149	40.4356	43.3011	34.7211	37.7397	50.586	44.2999	39.1041	40.8857	34.3928	41.7877	1.04959	-1.04959	0.673004	0.874461
1792	P49588;P49588-2	P49588	AARS	AARS	AARS	alanyl-tRNA synthetase	16q22.1	47	44	39	45	43	41	38	40	36	35	40	39	44.4166	41.4149	35.0442	40.5948	41.4724	39.675	45.7683	49.2222	36.0961	36.6923	40.4621	38.8029	1.01824	-1.01824	0.911913	0.971735
4490	Q99798	Q99798	ACO2	ACO2	ACO2	aconitase 2	22q13.2	39	34	43	54	54	53	41	46	32	35	29	27	36.8563	32.0024	38.6384	48.7137	52.0816	51.2872	49.3815	56.6055	32.0854	36.6923	29.335	26.8635	-1.1239	1.1239	0.305511	0.622913
1170	P16152;P16152-2	P16152	CBR1	CBR1	CBR1	carbonyl reductase 1	21q22.12	34	35	59	58	47	47	38	40	36	33	27	32	32.1311	32.9437	53.0155	52.3222	45.3303	45.4811	45.7683	49.2222	36.0961	34.5956	27.3119	31.8383	-1.16186	1.16186	0.179124	0.497997
2340	Q02790	Q02790	FKBP4	FKBP4	FKBP4	FK506 binding protein 4	12p13.33	42	48	40	40	41	46	29	27	42	40	44	46	39.6914	45.1799	35.9427	36.0842	39.5434	44.5135	34.9284	33.225	42.1121	41.9341	44.5083	45.7675	1.00631	-1.00631	0.854909	0.958554
1504	P31939;P31939-2	P31939	ATIC	ATIC	ATIC	5-aminoimidazole-4-carboxamide ribonucleotide formyltransferase/IMP cyclohydrolase	2q35	44	40	37	36	36	43	33	36	51	54	44	30	41.5815	37.6499	33.247	32.4758	34.7211	41.6104	39.7461	44.2999	51.1361	56.611	44.5083	29.8484	1.20274	-1.20274	0.0626392	0.300212
3967	Q8WXH0;Q8WXH0-2;Q8WXH0-7;Q8WXH0-13;Q8WXH0-3;Q8WXH0-4;Q8WXH0-10;Q8WXH0-6;Q8WXH0-11;Q8WXH0-9;Q8WXH0-8	Q8WXH0	SYNE2	SYNE2	SYNE2	spectrin repeat containing nuclear envelope protein 2	14q23.2	23	42	9	17	46	39	90	96	40	25	30	26	21.7358	39.5324	8.08711	15.3358	44.3658	37.7397	108.399	118.133	40.1067	26.2088	30.3466	25.8686	2.09274	-2.09274	0.106329	0.38307
2966	Q1KMD3	Q1KMD3	HNRNPUL2	HNRNPUL2	HNRNPUL2	heterogeneous nuclear ribonucleoprotein U like 2	11q12.3	38	47	41	46	46	42	32	37	40	41	37	35	35.9113	44.2386	36.8413	41.4969	44.3658	40.6427	38.5417	45.5305	40.1067	42.9824	37.4275	34.8231	-1.01706	1.01706	0.830216	0.950157
3063	Q58WW2;Q58WW2-2;Q58WW2-4;Q58WW2-3	Q58WW2	DCAF6	DCAF6	DCAF6	DDB1 and CUL4 associated factor 6	1q24.2	1	1	0	0	2	1	0	0	0	0	0	0	0.945033	0.941247	0	0	1.92895	0.967684	0	0	0	0	0	0	-10000	10000	0.0130866	0.126207
1357	P25398	P25398	RPS12	RPS12	RPS12	ribosomal protein S12	6q23.2	45	35	48	51	43	39	26	30	39	35	44	45	42.5265	32.9437	43.1313	46.0074	41.4724	37.7397	31.3151	36.9166	39.1041	36.6923	44.5083	44.7725	-1.04506	1.04506	0.686227	0.882261
3651	Q8N1Q1	Q8N1Q1	CA13	CA13	CA13	carbonic anhydrase 13	8q21.2	0	0	1	1	2	1	0	0	0	0	0	0	0	0	0.898568	0.902106	1.92895	0.967684	0	0	0	0	0	0	-10000	10000	0.0130866	0.126207
2184	P63000-2;P63000	P63000-2	RAC1	RAC1	RAC1	Rac family small GTPase 1	7p22.1	40	44	48	51	41	42	31	27	41	34	36	43	37.8013	41.4149	43.1313	46.0074	39.5434	40.6427	37.3373	33.225	41.1094	35.6439	36.4159	42.7827	-1.09724	1.09724	0.345172	0.657069
5847	Q9Y5B9	Q9Y5B9	SUPT16H	SUPT16H	SUPT16H	SPT16 homolog, facilitates chromatin remodeling subunit	14q11.2	50	45	42	33	42	36	32	46	41	38	33	40	47.2517	42.3561	37.7399	29.7695	40.5079	34.8366	38.5417	56.6055	41.1094	39.8374	33.3813	39.7978	1.07232	-1.07232	0.507765	0.781451
1611	P39019	P39019	RPS19	RPS19	RPS19	ribosomal protein S19	19q13.2	39	38	39	39	46	38	34	33	40	43	44	44	36.8563	35.7674	35.0442	35.1821	44.3658	36.772	40.9506	40.6083	40.1067	45.0791	44.5083	43.7776	1.13859	-1.13859	0.158203	0.461056
1183	P16615;P16615-5;P16615-2;P16615-3;P16615-4;O14983-2;O14983;O14983-3	P16615	ATP2A2;ATP2A1	ATP2A2	ATP2A2	ATPase sarcoplasmic/endoplasmic reticulum Ca2+ transporting 2	12q24.11	44	45	35	34	45	46	34	31	45	45	41	30	41.5815	42.3561	31.4499	30.6716	43.4013	44.5135	40.9506	38.1472	45.1201	47.1758	41.4737	29.8484	1.03736	-1.03736	0.668912	0.872326
907	P06737-2;P06737	P06737-2	PYGL	PYGL	PYGL	glycogen phosphorylase L	14q22.1	45	37	55	51	50	47	41	48	27	25	28	19	42.5265	34.8261	49.4213	46.0074	48.2237	45.4811	49.3815	59.0666	27.0721	26.2088	28.3235	18.904	-1.27532	1.27532	0.0721774	0.318344
3837	Q8TB03;Q8TB03-2;Q8TB03-3	Q8TB03	CXorf38	CXorf38	CXorf38	chromosome X open reading frame 38	Xp11.4	0	0	2	2	1	0	0	0	0	0	0	0	0	0	1.79714	1.80421	0.964474	0	0	0	0	0	0	0	-10000	10000	0.0186257	0.155495
5604	Q9ULV4;Q9ULV4-2;Q9ULV4-3;Q6QEF8-4;Q6QEF8-3;Q6QEF8-2;Q6QEF8-5;Q6QEF8	Q9ULV4	CORO1C;CORO6	CORO1C	CORO1C	coronin 1C	12q24.11	34	44	35	35	40	38	23	27	43	48	55	46	32.1311	41.4149	31.4499	31.5737	38.579	36.772	27.7018	33.225	43.1148	50.3209	55.6354	45.7675	1.20689	-1.20689	0.0678582	0.310636
832	P01889	P01889	HLA-B	HLA-B	HLA-B	major histocompatibility complex, class I, B	6p21.33	37	40	41	42	64	58	18	12	39	33	37	46	34.9662	37.6499	36.8413	37.8885	61.7263	56.1257	21.6797	14.7666	39.1041	34.5956	37.4275	45.7675	-1.37166	1.37166	0.0663454	0.308926
1734	P47897;P47897-2	P47897	QARS	QARS	QARS	glutaminyl-tRNA synthetase	3p21.31	41	40	45	46	46	45	35	34	34	38	34	29	38.7464	37.6499	40.4356	41.4969	44.3658	43.5458	42.155	41.8388	34.0907	39.8374	34.3928	28.8534	-1.11336	1.11336	0.225812	0.550764
2856	Q15459;Q15459-2	Q15459	SF3A1	SF3A1	SF3A1	splicing factor 3a subunit 1	22q12.2	46	45	33	38	39	36	36	35	42	37	42	35	43.4715	42.3561	29.6528	34.28	37.6145	34.8366	43.3594	43.0694	42.1121	38.789	42.4852	34.8231	1.10092	-1.10092	0.321964	0.639074
3961	Q8WXA3-2;Q8WXA3-4;Q8WXA3-3;Q8WXA3	Q8WXA3-2	RUFY2	RUFY2	RUFY2	RUN and FYVE domain containing 2	10q21.3	0	1	1	1	1	1	0	0	0	0	0	0	0	0.941247	0.898568	0.902106	0.964474	0.967684	0	0	0	0	0	0	-10000	10000	0.0121699	0.123045
5853	Q9Y5K6	Q9Y5K6	CD2AP	CD2AP	CD2AP	CD2 associated protein	6p12.3	44	43	31	35	43	36	28	29	47	42	41	42	41.5815	40.4736	27.8556	31.5737	41.4724	34.8366	33.724	35.6861	47.1254	44.0308	41.4737	41.7877	1.11954	-1.11954	0.196268	0.526359
1510	P31947-2;P31947	P31947-2	SFN	SFN	SFN	stratifin	1p36.11	39	40	55	47	37	32	34	33	40	39	31	33	36.8563	37.6499	49.4213	42.399	35.6855	30.9659	40.9506	40.6083	40.1067	40.8857	31.3582	32.8332	-1.0275	1.0275	0.710958	0.89576
3980	Q92499;Q92499-3;Q92499-2	Q92499	DDX1	DDX1	DDX1	DEAD-box helicase 1	2p24.3	35	42	37	40	42	39	32	37	41	44	33	37	33.0762	39.5324	33.247	36.0842	40.5079	37.7397	38.5417	45.5305	41.1094	46.1275	33.3813	36.813	1.09681	-1.09681	0.352414	0.662413
4580	Q9BT25-2;Q9BT25-3;Q9BT25	Q9BT25-2	HAUS8	HAUS8	HAUS8	HAUS augmin like complex subunit 8	19p13.11	0	1	2	1	1	0	0	0	0	0	0	0	0	0.941247	1.79714	0.902106	0.964474	0	0	0	0	0	0	0	-10000	10000	0.0130866	0.126207
1065	P11387	P11387	TOP1	TOP1	TOP1	DNA topoisomerase I	20q12	44	45	34	34	47	51	32	35	41	31	36	27	41.5815	42.3561	30.5513	30.6716	45.3303	49.3519	38.5417	43.0694	41.1094	32.4989	36.4159	26.8635	-1.09768	1.09768	0.348258	0.659448
1720	P46782	P46782	RPS5	RPS5	RPS5	ribosomal protein S5	19q13.4	35	26	59	54	33	33	32	27	35	50	35	38	33.0762	24.4724	53.0155	48.7137	31.8276	31.9336	38.5417	33.225	35.0934	52.4176	35.4044	37.8079	1.04237	-1.04237	0.692661	0.885579
4614	Q9BUF7	Q9BUF7	CRB3	CRB3	CRB3	crumbs 3, cell polarity complex component	19p13.3	1	0	1	1	1	1	0	0	0	0	0	0	0.945033	0	0.898568	0.902106	0.964474	0.967684	0	0	0	0	0	0	-10000	10000	0.0121699	0.123045
4833	Q9H1D9	Q9H1D9	POLR3F	POLR3F	POLR3F	RNA polymerase III subunit F	20p11.23	1	1	1	1	1	0	0	0	0	0	0	0	0.945033	0.941247	0.898568	0.902106	0.964474	0	0	0	0	0	0	0	-10000	10000	0.0121699	0.123045
3179	Q63HN8;Q63HN8-4;Q63HN8-5;Q63HN8-6	Q63HN8	RNF213	RNF213	RNF213	ring finger protein 213	17q25.3	22	32	30	58	71	78	31	21	33	24	29	24	20.7907	30.1199	26.957	52.3222	68.4777	75.4793	37.3373	25.8416	33.0881	25.1604	29.335	23.8787	-1.56977	1.56977	0.133195	0.418016
5670	Q9UQ80;Q9UQ80-2	Q9UQ80	PA2G4	PA2G4	PA2G4	proliferation-associated 2G4	12q13.2	47	46	37	28	38	36	28	31	41	38	38	43	44.4166	43.2974	33.247	25.259	36.65	34.8366	33.724	38.1472	41.1094	39.8374	38.439	42.7827	1.07502	-1.07502	0.408509	0.707084
4836	Q9H1H9-3;Q9H1H9-4;Q9H1H9-2;Q9H1H9	Q9H1H9-3	KIF13A	KIF13A	KIF13A	kinesin family member 13A	6p22.3	2	2	0	1	0	0	0	0	0	0	0	0	1.89007	1.88249	0	0.902106	0	0	0	0	0	0	0	0	-10000	10000	0.0194729	0.159419
1839	P50454	P50454	SERPINH1	SERPINH1	SERPINH1	serpin family H member 1	11q13.5	41	45	42	35	31	34	24	29	43	43	39	44	38.7464	42.3561	37.7399	31.5737	29.8987	32.9012	28.9063	35.6861	43.1148	45.0791	39.4506	43.7776	1.10693	-1.10693	0.25685	0.574633
4074	Q93052	Q93052	LPP	LPP	LPP	LIM domain containing preferred translocation partner in lipoma	3q27.3-q28	45	46	44	44	40	36	27	20	36	43	36	33	42.5265	43.2974	39.537	39.6927	38.579	34.8366	32.5196	24.6111	36.0961	45.0791	36.4159	32.8332	-1.14894	1.14894	0.178735	0.497997
718	O95347;O95347-2	O95347	SMC2	SMC2	SMC2	structural maintenance of chromosomes 2	9q31.1	50	45	38	33	40	37	18	25	42	36	41	43	47.2517	42.3561	34.1456	29.7695	38.579	35.8043	21.6797	30.7639	42.1121	37.7407	41.4737	42.7827	-1.05243	1.05243	0.727948	0.906776
2093	P61604	P61604	HSPE1	HSPE1	HSPE1	heat shock protein family E (Hsp10) member 1	2q33.1	39	34	36	45	49	42	34	32	32	31	33	41	36.8563	32.0024	32.3485	40.5948	47.2592	40.6427	40.9506	39.3777	32.0854	32.4989	33.3813	40.7928	-1.04846	1.04846	0.60929	0.839281
1096	P13489	P13489	RNH1	RNH1	RNH1	ribonuclease/angiogenin inhibitor 1	11p15.5	39	39	46	40	40	42	29	35	35	30	35	37	36.8563	36.7086	41.3341	36.0842	38.579	40.6427	34.9284	43.0694	35.0934	31.4505	35.4044	36.813	-1.06203	1.06203	0.511492	0.785623
4840	Q9H1P3-2;Q9H1P3	Q9H1P3-2	OSBPL2	OSBPL2	OSBPL2	oxysterol binding protein like 2	20q13.33	0	1	2	1	1	0	0	0	0	0	0	0	0	0.941247	1.79714	0.902106	0.964474	0	0	0	0	0	0	0	-10000	10000	0.0130866	0.126207
2149	P62701	P62701	RPS4X	RPS4X	RPS4X	ribosomal protein S4, X-linked	Xq13.1	32	38	44	43	33	39	30	19	43	38	41	43	30.2411	35.7674	39.537	38.7906	31.8276	37.7397	36.1328	23.3805	43.1148	39.8374	41.4737	42.7827	1.05993	-1.05993	0.483624	0.762236
2354	Q03252	Q03252	LMNB2	LMNB2	LMNB2	lamin B2	19p13.3	51	42	38	36	27	27	37	30	43	42	42	28	48.1967	39.5324	34.1456	32.4758	26.0408	26.1275	44.5638	36.9166	43.1148	44.0308	42.4852	27.8585	1.15713	-1.15713	0.198493	0.528526
4930	Q9H7B4;Q9H7B4-2;Q9H7B4-3	Q9H7B4	SMYD3	SMYD3	SMYD3	SET and MYND domain containing 3	1q44	0	1	1	0	2	1	0	0	0	0	0	0	0	0.941247	0.898568	0	1.92895	0.967684	0	0	0	0	0	0	-10000	10000	0.0130866	0.126207
938	P07858	P07858	CTSB	CTSB	CTSB	cathepsin B	8p23.1	44	45	40	40	43	44	40	34	33	28	22	27	41.5815	42.3561	35.9427	36.0842	41.4724	42.5781	48.1771	41.8388	33.0881	29.3538	22.2542	26.8635	-1.1907	1.1907	0.0690294	0.311823
2634	Q13838;Q13838-2	Q13838	DDX39B	DDX39B	DDX39B	DExD-box helicase 39B	6p21.33	39	40	41	36	32	32	29	27	40	38	37	49	36.8563	37.6499	36.8413	32.4758	30.8632	30.9659	34.9284	33.225	40.1067	39.8374	37.4275	48.7523	1.13919	-1.13919	0.164109	0.473215
4978	Q9HA65-3;Q9HA65;Q9HA65-2	Q9HA65-3	TBC1D17	TBC1D17	TBC1D17	TBC1 domain family member 17	19q13.33	1	1	2	0	1	0	0	0	0	0	0	0	0.945033	0.941247	1.79714	0	0.964474	0	0	0	0	0	0	0	-10000	10000	0.0130866	0.126207
888	P05387	P05387	RPLP2	RPLP2	RPLP2	ribosomal protein lateral stalk subunit P2	11p15.5	44	34	41	43	41	36	26	23	35	28	38	48	41.5815	32.0024	36.8413	38.7906	39.5434	34.8366	31.3151	28.3027	35.0934	29.3538	38.439	47.7574	-1.06342	1.06342	0.600053	0.838285
2816	Q15181	Q15181	PPA1	PPA1	PPA1	pyrophosphatase (inorganic) 1	10q22.1	39	38	48	43	35	39	26	30	36	32	35	36	36.8563	35.7674	43.1313	38.7906	33.7566	37.7397	31.3151	36.9166	36.0961	33.5472	35.4044	35.818	-1.08104	1.08104	0.430607	0.721212
4982	Q9HAN9	Q9HAN9	NMNAT1	NMNAT1	NMNAT1	nicotinamide nucleotide adenylyltransferase 1	1p36.22	0	1	1	1	1	1	0	0	0	0	0	0	0	0.941247	0.898568	0.902106	0.964474	0.967684	0	0	0	0	0	0	-10000	10000	0.0121699	0.123045
1382	P26599;P26599-2;P26599-3	P26599	PTBP1	PTBP1	PTBP1	polypyrimidine tract binding protein 1	19p13.3	33	35	36	37	34	37	27	33	43	40	36	43	31.1861	32.9437	32.3485	33.3779	32.7921	35.8043	32.5196	40.6083	43.1148	41.9341	36.4159	42.7827	1.19613	-1.19613	0.0644128	0.303558
904	P06703	P06703	S100A6	S100A6	S100A6	S100 calcium binding protein A6	1q21.3	38	29	43	49	36	40	36	36	35	36	23	30	35.9113	27.2962	38.6384	44.2032	34.7211	38.7073	43.3594	44.2999	35.0934	37.7407	23.2657	29.8484	-1.02748	1.02748	0.666922	0.870263
1446	P29692;P29692-2;P29692-4	P29692	EEF1D	EEF1D	EEF1D	eukaryotic translation elongation factor 1 delta	8q24.3	37	38	37	32	35	37	36	33	37	36	35	37	34.9662	35.7674	33.247	28.8674	33.7566	35.8043	43.3594	40.6083	37.0987	37.7407	35.4044	36.813	1.14137	-1.14137	0.196542	0.526359
5109	Q9NRA2-2;Q9NRA2	Q9NRA2-2	SLC17A5	SLC17A5	SLC17A5	solute carrier family 17 member 5	6q13	1	1	1	0	1	1	0	0	0	0	0	0	0.945033	0.941247	0.898568	0	0.964474	0.967684	0	0	0	0	0	0	-10000	10000	0.0121699	0.123045
2371	Q04917	Q04917	YWHAH	YWHAH	YWHAH	tyrosine 3-monooxygenase/tryptophan 5-monooxygenase activation protein eta	22q12.3	39	36	44	42	40	41	29	28	34	31	31	33	36.8563	33.8849	39.537	37.8885	38.579	39.675	34.9284	34.4555	34.0907	32.4989	31.3582	32.8332	-1.13117	1.13117	0.211412	0.540955
574	O75534;O75534-4;O75534-2;O75534-3	O75534	CSDE1	CSDE1	CSDE1	cold shock domain containing E1	1p13.2	39	41	35	34	37	37	29	26	38	37	39	35	36.8563	38.5911	31.4499	30.6716	35.6855	35.8043	34.9284	31.9944	38.1014	38.789	39.4506	34.8231	1.04318	-1.04318	0.629136	0.849226
5234	Q9NWU2	Q9NWU2	GID8	GID8	GID8	GID complex subunit 8 homolog	20q13.33	1	3	0	0	0	1	0	0	0	0	0	0	0.945033	2.82374	0	0	0	0.967684	0	0	0	0	0	0	-10000	10000	0.0281878	0.193412
1970	P54886;P54886-2	P54886	ALDH18A1	ALDH18A1	ALDH18A1	aldehyde dehydrogenase 18 family member A1	10q24.1	36	31	36	44	35	31	38	37	39	39	33	28	34.0212	29.1787	32.3485	39.6927	33.7566	29.9982	45.7683	45.5305	39.1041	40.8857	33.3813	27.8585	1.16851	-1.16851	0.153496	0.452461
2130	P62277	P62277	RPS13	RPS13	RPS13	ribosomal protein S13	11p15.1	36	32	44	44	40	35	25	19	40	31	33	48	34.0212	30.1199	39.537	39.6927	38.579	33.8689	30.1107	23.3805	40.1067	32.4989	33.3813	47.7574	-1.04142	1.04142	0.776668	0.932475
5291	Q9NYL2-2;Q9NYL2-3	Q9NYL2-2	ZAK	ZAK	MAP3K20	mitogen-activated protein kinase kinase kinase 20	2q31.1	0	1	1	1	1	1	0	0	0	0	0	0	0	0.941247	0.898568	0.902106	0.964474	0.967684	0	0	0	0	0	0	-10000	10000	0.0121699	0.123045
5389	Q9P2J5;Q9P2J5-2;Q9P2J5-3	Q9P2J5	LARS	LARS	LARS	leucyl-tRNA synthetase	5q32	41	47	24	21	36	38	25	44	34	43	34	39	38.7464	44.2386	21.5656	18.9442	34.7211	36.772	30.1107	54.1444	34.0907	45.0791	34.3928	38.8029	1.21351	-1.21351	0.164876	0.474431
5459	Q9UGI8;Q9UGI8-2	Q9UGI8	TES	TES	TES	testin LIM domain protein	7q31.2	46	41	40	43	27	25	22	24	38	38	39	43	43.4715	38.5911	35.9427	38.7906	26.0408	24.1921	26.4974	29.5333	38.1014	39.8374	39.4506	42.7827	1.04431	-1.04431	0.614359	0.839281
408	O43776;O43776-2	O43776	NARS	NARS	NARS	asparaginyl-tRNA synthetase	18q21.31	38	25	46	43	42	40	28	35	34	32	30	32	35.9113	23.5312	41.3341	38.7906	40.5079	38.7073	33.724	43.0694	34.0907	33.5472	30.3466	31.8383	-1.05888	1.05888	0.521622	0.794719
1460	P30048-2;P30048	P30048-2	PRDX3	PRDX3	PRDX3	peroxiredoxin 3	10q26.11	36	29	42	41	41	42	39	24	33	32	27	39	34.0212	27.2962	37.7399	36.9864	39.5434	40.6427	46.9727	29.5333	33.0881	33.5472	27.3119	38.8029	-1.03333	1.03333	0.711753	0.89576
5390	Q9P2K3-2;Q9P2K3-4;Q9P2K3;Q9P2K3-3;Q9UKL0	Q9P2K3-2	RCOR3;RCOR1	RCOR3	RCOR3	REST corepressor 3	1q32.2-q32.3	2	0	0	1	1	1	0	0	0	0	0	0	1.89007	0	0	0.902106	0.964474	0.967684	0	0	0	0	0	0	-10000	10000	0.0130866	0.126207
2116	P62158;P02585	P62158	CALM1;TNNC2	CALM1	CALM1	calmodulin 1	14q32.11	43	37	34	31	35	31	34	33	41	31	34	41	40.6364	34.8261	30.5513	27.9653	33.7566	29.9982	40.9506	40.6083	41.1094	32.4989	34.3928	40.7928	1.16496	-1.16496	0.129025	0.411479
5703	Q9Y2H2;Q9Y2H2-4	Q9Y2H2	INPP5F	INPP5F	INPP5F	inositol polyphosphate-5-phosphatase F	10q26.11	1	0	2	1	1	0	0	0	0	0	0	0	0.945033	0	1.79714	0.902106	0.964474	0	0	0	0	0	0	0	-10000	10000	0.0130866	0.126207
5763	Q9Y3C0	Q9Y3C0	WASHC3	WASHC3	WASHC3	WASH complex subunit 3	12q23.2	1	2	0	1	1	0	0	0	0	0	0	0	0.945033	1.88249	0	0.902106	0.964474	0	0	0	0	0	0	0	-10000	10000	0.0130866	0.126207
1908	P52565;P52565-2	P52565	ARHGDIA	ARHGDIA	ARHGDIA	Rho GDP dissociation inhibitor alpha	17q25.3	36	36	46	44	32	33	29	31	34	34	34	32	34.0212	33.8849	41.3341	39.6927	30.8632	31.9336	34.9284	38.1472	34.0907	35.6439	34.3928	31.8383	-1.01286	1.01286	0.852502	0.95658
2747	Q14839;Q14839-2;Q8TDI0	Q14839	CHD4;CHD5	CHD4	CHD4	chromodomain helicase DNA binding protein 4	12p13.31	50	39	36	35	24	33	33	20	43	38	35	35	47.2517	36.7086	32.3485	31.5737	23.1474	31.9336	39.7461	24.6111	43.1148	39.8374	35.4044	34.8231	1.0718	-1.0718	0.479851	0.762236
377	O43491;O43491-3;O43491-2;Q9Y2J2-3;Q9Y2J2-2;Q9Y2J2-4;Q9Y2J2	O43491	EPB41L2;EPB41L3	EPB41L2	EPB41L2	erythrocyte membrane protein band 4.1 like 2	6q23.1-q23.2	47	44	24	13	30	28	21	30	46	34	54	49	44.4166	41.4149	21.5656	11.7274	28.9342	27.0951	25.293	36.9166	46.1228	35.6439	54.6239	48.7523	1.4122	-1.4122	0.0568818	0.287101
2009	P56192;P56192-2	P56192	MARS	MARS	MARS	methionyl-tRNA synthetase	12q13.3	35	37	34	32	39	43	26	30	40	34	39	31	33.0762	34.8261	30.5513	28.8674	37.6145	41.6104	31.3151	36.9166	40.1067	35.6439	39.4506	30.8433	1.03743	-1.03743	0.675877	0.876537
5861	Q9Y5Q0	Q9Y5Q0	FADS3	FADS3	FADS3	fatty acid desaturase 3	11q12.2	0	1	1	1	2	0	0	0	0	0	0	0	0	0.941247	0.898568	0.902106	1.92895	0	0	0	0	0	0	0	-10000	10000	0.0130866	0.126207
597	O75794	O75794	CDC123	CDC123	CDC123	cell division cycle 123	10p14-p13	1	0	2	1	0	0	0	0	0	0	0	0	0.945033	0	1.79714	0.902106	0	0	0	0	0	0	0	0	-10000	10000	0.0276024	0.192926
179	O00622	O00622	CYR61	CYR61	CYR61	cysteine rich angiogenic inducer 61	1p22.3	30	35	35	34	20	16	20	12	51	54	56	54	28.351	32.9437	31.4499	30.6716	19.2895	15.4829	24.0886	14.7666	51.1361	56.611	56.647	53.727	1.62449	-1.62449	0.0786533	0.32492
676	O94979-6;O94979-3;O94979-10;O94979-4;O94979-9;O94979-2;O94979;O94979-8;O94979-7;O94979-5	O94979-6	SEC31A	SEC31A	SEC31A	SEC31 homolog A, COPII coat complex component	4q21.22	34	26	46	29	37	39	27	45	31	38	27	38	32.1311	24.4724	41.3341	26.1611	35.6855	37.7397	32.5196	55.3749	31.0827	39.8374	27.3119	37.8079	1.13371	-1.13371	0.350727	0.660291
3130	Q5T4S7-3;Q5T4S7-4;Q5T4S7;Q5T4S7-2;Q5T4S7-5;Q5T4S7-6	Q5T4S7-3	UBR4	UBR4	UBR4	ubiquitin protein ligase E3 component n-recognin 4	1p36.13	47	32	19	31	48	47	30	27	35	37	36	28	44.4166	30.1199	17.0728	27.9653	46.2947	45.4811	36.1328	33.225	35.0934	38.789	36.4159	27.8585	-1.01848	1.01848	0.934038	0.973654
757	O95685	O95685	PPP1R3D	PPP1R3D	PPP1R3D	protein phosphatase 1 regulatory subunit 3D	20q13.33	0	0	2	0	1	1	0	0	0	0	0	0	0	0	1.79714	0	0.964474	0.967684	0	0	0	0	0	0	-10000	10000	0.0278145	0.192926
1042	P10646	P10646	TFPI	TFPI	TFPI	tissue factor pathway inhibitor	2q32.1	1	0	0	0	2	1	0	0	0	0	0	0	0.945033	0	0	0	1.92895	0.967684	0	0	0	0	0	0	-10000	10000	0.0281998	0.193412
5079	Q9NQC3-2;Q9NQC3-5;Q9NQC3;Q9NQC3-4;Q9NQC3-3;Q9NQC3-6	Q9NQC3-2	RTN4	RTN4	RTN4	reticulon 4	2p16.1	37	30	34	36	43	33	37	31	41	31	29	34	34.9662	28.2374	30.5513	32.4758	41.4724	31.9336	44.5638	38.1472	41.1094	32.4989	29.335	33.8281	1.09941	-1.09941	0.375695	0.674021
1184	P16885	P16885	PLCG2	PLCG2	PLCG2	phospholipase C gamma 2	16q24.1	0	0	1	0	1	2	0	0	0	0	0	0	0	0	0.898568	0	0.964474	1.93537	0	0	0	0	0	0	-10000	10000	0.0280353	0.193183
1668	P42694;P42694-2	P42694	HELZ	HELZ	HELZ	helicase with zinc finger	17q24.2	1	0	2	0	1	0	0	0	0	0	0	0	0.945033	0	1.79714	0	0.964474	0	0	0	0	0	0	0	-10000	10000	0.027754	0.192926
434	O60264	O60264	SMARCA5	SMARCA5	SMARCA5	SWI/SNF related, matrix associated, actin dependent regulator of chromatin, subfamily a, member 5	4q31.21	19	47	40	29	39	36	21	42	34	37	33	37	17.9556	44.2386	35.9427	26.1611	37.6145	34.8366	25.293	51.6833	34.0907	38.789	33.3813	36.813	1.11843	-1.11843	0.397097	0.696587
2072	P61160;P61160-2	P61160	ACTR2	ACTR2	ACTR2	ARP2 actin related protein 2 homolog	2p14	34	32	36	37	33	38	29	23	37	42	36	37	32.1311	30.1199	32.3485	33.3779	31.8276	36.772	34.9284	28.3027	37.0987	44.0308	36.4159	36.813	1.10689	-1.10689	0.287468	0.603807
1888	P51798-2;P51798	P51798-2	CLCN7	CLCN7	CLCN7	chloride voltage-gated channel 7	16p13.3	1	2	0	0	0	1	0	0	0	0	0	0	0.945033	1.88249	0	0	0	0.967684	0	0	0	0	0	0	-10000	10000	0.0280343	0.193183
1882	P51659;P51659-3;P51659-2	P51659	HSD17B4	HSD17B4	HSD17B4	hydroxysteroid 17-beta dehydrogenase 4	5q23.1	44	40	28	29	48	42	27	30	33	29	31	32	41.5815	37.6499	25.1599	26.1611	46.2947	40.6427	32.5196	36.9166	33.0881	30.4022	31.3582	31.8383	-1.10895	1.10895	0.345574	0.657069
2843	Q15393;Q15393-3;Q15393-2	Q15393	SF3B3	SF3B3	SF3B3	splicing factor 3b subunit 3	16q22.1	37	45	32	32	34	36	29	33	31	32	36	35	34.9662	42.3561	28.7542	28.8674	32.7921	34.8366	34.9284	40.6083	31.0827	33.5472	36.4159	34.8231	1.0436	-1.0436	0.687369	0.882547
2426	Q08431-2;Q08431-3;Q08431	Q08431-2	MFGE8	MFGE8	MFGE8	milk fat globule-EGF factor 8 protein	15q26.1	2	1	0	1	0	0	0	0	0	0	0	0	1.89007	0.941247	0	0.902106	0	0	0	0	0	0	0	0	-10000	10000	0.0278356	0.192926
3144	Q5TEU4-2;Q5TEU4	Q5TEU4-2	NDUFAF5	NDUFAF5	NDUFAF5	NADH:ubiquinone oxidoreductase complex assembly factor 5	20p12.1	2	1	1	0	0	0	0	0	0	0	0	0	1.89007	0.941247	0.898568	0	0	0	0	0	0	0	0	0	-10000	10000	0.0278246	0.192926
148	O00429;O00429-3;O00429-6;O00429-5;O00429-7	O00429	DNM1L	DNM1L	DNM1L	dynamin 1 like	12p11.21	46	40	30	34	42	41	28	32	32	30	31	24	43.4715	37.6499	26.957	30.6716	40.5079	39.675	33.724	39.3777	32.0854	31.4505	31.3582	23.8787	-1.14102	1.14102	0.182594	0.503864
732	O95425-4;O95425-3;O95425;O95425-2	O95425-4	SVIL	SVIL	SVIL	supervillin	10p11.23	50	42	52	47	22	19	18	15	34	37	40	34	47.2517	39.5324	46.7255	42.399	21.2184	18.386	21.6797	18.4583	34.0907	38.789	40.4621	33.8281	-1.15058	1.15058	0.5364	0.808223
2415	Q07955;Q07955-3;Q07955-2	Q07955	SRSF1	SRSF1	SRSF1	serine and arginine rich splicing factor 1	17q22	33	38	38	34	31	32	29	33	37	32	35	38	31.1861	35.7674	34.1456	30.6716	29.8987	30.9659	34.9284	40.6083	37.0987	33.5472	35.4044	37.8079	1.13891	-1.13891	0.20925	0.540955
3196	Q68DK2-2;Q68DK2	Q68DK2-2	ZFYVE26	ZFYVE26	ZFYVE26	zinc finger FYVE-type containing 26	14q24.1	1	0	0	0	2	1	0	0	0	0	0	0	0.945033	0	0	0	1.92895	0.967684	0	0	0	0	0	0	-10000	10000	0.0281998	0.193412
4617	Q9BUJ2-2;Q9BUJ2;Q9BUJ2-4;Q9BUJ2-3;Q9BUJ2-5	Q9BUJ2-2	HNRNPUL1	HNRNPUL1	HNRNPUL1	heterogeneous nuclear ribonucleoprotein U like 1	19q13.2	41	35	39	42	33	36	28	27	36	30	33	29	38.7464	32.9437	35.0442	37.8885	31.8276	34.8366	33.724	33.225	36.0961	31.4505	33.3813	28.8534	-1.07399	1.07399	0.474434	0.759377
1776	P49321;P49321-3;P49321-4;P49321-2	P49321	NASP	NASP	NASP	nuclear autoantigenic sperm protein	1p34.1	30	36	42	36	34	37	21	23	33	38	34	44	28.351	33.8849	37.7399	32.4758	32.7921	35.8043	25.293	28.3027	33.0881	39.8374	34.3928	43.7776	1.01812	-1.01812	0.78159	0.935537
5311	Q9NZB2;Q9NZB2-6;Q9NZB2-4;Q9NZB2-2;Q9NZB2-5;Q5T035	Q9NZB2	FAM120A;C9orf129	FAM120A	FAM120A	family with sequence similarity 120A	9q22.31	23	39	46	37	39	41	22	33	31	39	27	31	21.7358	36.7086	41.3341	33.3779	37.6145	39.675	26.4974	40.6083	31.0827	40.8857	27.3119	30.8433	-1.06701	1.06701	0.519454	0.79264
1721	P46783;Q9NQ39	P46783	RPS10;RPS10P5	RPS10	RPS10	ribosomal protein S10	6p21.31	32	40	34	35	31	30	24	28	41	32	39	40	30.2411	37.6499	30.5513	31.5737	29.8987	29.0305	28.9063	34.4555	41.1094	33.5472	39.4506	39.7978	1.14989	-1.14989	0.151699	0.450848
2933	Q16643;Q16643-2;Q16643-3	Q16643	DBN1	DBN1	DBN1	drebrin 1	5q35.3	45	42	17	17	35	37	23	27	46	36	38	43	42.5265	39.5324	15.2757	15.3358	33.7566	35.8043	27.7018	33.225	46.1228	37.7407	38.439	42.7827	1.24025	-1.24025	0.136407	0.424274
2847	Q15417;Q15417-3;Q15417-2	Q15417	CNN3	CNN3	CNN3	calponin 3	1p21.3	44	42	32	34	28	29	20	19	35	36	47	39	41.5815	39.5324	28.7542	30.6716	27.0053	28.0628	24.0886	23.3805	35.0934	37.7407	47.543	38.8029	1.05645	-1.05645	0.594668	0.838285
5673	Q9UQE7	Q9UQE7	SMC3	SMC3	SMC3	structural maintenance of chromosomes 3	10q25.2	50	44	40	25	33	33	24	28	35	25	35	33	47.2517	41.4149	35.9427	22.5527	31.8276	31.9336	28.9063	34.4555	35.0934	26.2088	35.4044	32.8332	-1.09342	1.09342	0.451071	0.742462
2884	Q15691	Q15691	MAPRE1	MAPRE1	MAPRE1	microtubule associated protein RP/EB family member 1	20q11.21	46	41	33	36	39	37	19	18	33	32	33	37	43.4715	38.5911	29.6528	32.4758	37.6145	35.8043	22.8841	22.15	33.0881	33.5472	33.3813	36.813	-1.19656	1.19656	0.115455	0.390057
1287	P21589;P21589-2	P21589	NT5E	NT5E	NT5E	5'-nucleotidase ecto	6q14.3	31	29	22	24	29	34	61	53	35	32	34	19	29.296	27.2962	19.7685	21.6505	27.9697	32.9012	73.4701	65.2194	35.0934	33.5472	34.3928	18.904	1.64038	-1.64038	0.0690074	0.311823
3265	Q6P4A7-2;Q6P4A7	Q6P4A7-2	SFXN4	SFXN4	SFXN4	sideroflexin 4	10q26.11	0	1	1	1	1	0	0	0	0	0	0	0	0	0.941247	0.898568	0.902106	0.964474	0	0	0	0	0	0	0	-10000	10000	0.0249299	0.179078
884	P05198	P05198	EIF2S1	EIF2S1	EIF2S1	eukaryotic translation initiation factor 2 subunit alpha	14q23.3	39	34	33	35	33	35	26	23	34	34	40	35	36.8563	32.0024	29.6528	31.5737	31.8276	33.8689	31.3151	28.3027	34.0907	35.6439	40.4621	34.8231	1.04523	-1.04523	0.613372	0.839281
583	O75643;O75643-2	O75643	SNRNP200	SNRNP200	SNRNP200	small nuclear ribonucleoprotein U5 subunit 200	2q11.2	41	38	33	32	30	32	26	20	34	36	39	39	38.7464	35.7674	29.6528	28.8674	28.9342	30.9659	31.3151	24.6111	34.0907	37.7407	39.4506	38.8029	1.06778	-1.06778	0.457217	0.747793
1283	P21291	P21291	CSRP1	CSRP1	CSRP1	cysteine and glycine rich protein 1	1q32.1	39	41	38	43	25	29	23	19	45	40	27	31	36.8563	38.5911	34.1456	38.7906	24.1118	28.0628	27.7018	23.3805	45.1201	41.9341	27.3119	30.8433	-1.02174	1.02174	0.877304	0.965377
1623	P40261	P40261	NNMT	NNMT	NNMT	nicotinamide N-methyltransferase	11q23.1	28	26	27	25	36	39	69	57	24	24	25	20	26.4609	24.4724	24.2613	22.5527	34.7211	37.7397	83.1055	70.1416	24.064	25.1604	25.2888	19.8989	1.45504	-1.45504	0.399158	0.698378
2725	Q14683	Q14683	SMC1A	SMC1A	SMC1A	structural maintenance of chromosomes 1A	Xp11.22	36	32	37	32	32	33	33	33	32	17	41	42	34.0212	30.1199	33.247	28.8674	30.8632	31.9336	39.7461	40.6083	32.0854	17.822	41.4737	41.7877	1.12944	-1.12944	0.276138	0.58942
2076	P84077;P61204;P61204-2	P84077	ARF1;ARF3	ARF1	ARF1	ADP ribosylation factor 1	1q42.13	42	33	49	39	39	28	31	18	34	29	23	34	39.6914	31.0612	44.0298	35.1821	37.6145	27.0951	37.3373	22.15	34.0907	30.4022	23.2657	33.8281	-1.18556	1.18556	0.104278	0.378664
2431	Q08945	Q08945	SSRP1	SSRP1	SSRP1	structure specific recognition protein 1	11q12.1	40	39	30	34	37	33	23	27	36	35	35	30	37.8013	36.7086	26.957	30.6716	35.6855	31.9336	27.7018	33.225	36.0961	36.6923	35.4044	29.8484	-1.00397	1.00397	0.985469	0.994712
870	P04899;P04899-4;P04899-6;P04899-3;P04899-5;P04899-2;P09471-2;P09471;P11488;P19087;A8MTJ3	P04899	GNAI2;GNAO1;GNAT1;GNAT2;GNAT3	GNAI2	GNAI2	G protein subunit alpha i2	3p21.31	32	35	40	40	32	29	32	27	31	31	35	32	30.2411	32.9437	35.9427	36.0842	30.8632	28.0628	38.5417	33.225	31.0827	32.4989	35.4044	31.8383	1.04354	-1.04354	0.721628	0.902836
2156	P62826	P62826	RAN	RAN	RAN	RAN, member RAS oncogene family	12q24.33	33	29	28	29	37	41	31	31	35	32	33	36	31.1861	27.2962	25.1599	26.1611	35.6855	39.675	37.3373	38.1472	35.0934	33.5472	33.3813	35.818	1.15208	-1.15208	0.167315	0.479344
3646	Q8N1F7;Q8N1F7-2	Q8N1F7	NUP93	NUP93	NUP93	nucleoporin 93	16q13	33	37	31	35	29	33	29	27	40	36	36	29	31.1861	34.8261	27.8556	31.5737	27.9697	31.9336	34.9284	33.225	40.1067	37.7407	36.4159	28.8534	1.13988	-1.13988	0.202722	0.532458
880	P05141;Q9H0C2	P05141	SLC25A5;SLC25A31	SLC25A5	SLC25A5	solute carrier family 25 member 5	Xq24	28	30	50	45	32	32	25	27	32	31	31	31	26.4609	28.2374	44.9284	40.5948	30.8632	30.9659	30.1107	33.225	32.0854	32.4989	31.3582	30.8433	-1.06275	1.06275	0.537005	0.808295
3283	Q6PJI9-3;Q6PJI9;Q6PJI9-4;Q6PJI9-2	Q6PJI9-3	WDR59	WDR59	WDR59	WD repeat domain 59	16q23.1	1	0	1	2	0	0	0	0	0	0	0	0	0.945033	0	0.898568	1.80421	0	0	0	0	0	0	0	0	-10000	10000	0.0276106	0.192926
3549	Q8IVL0-3;Q8IVL0-2;Q8IVL0	Q8IVL0-3	NAV3	NAV3	NAV3	neuron navigator 3	12q21.2	1	1	1	1	0	0	0	0	0	0	0	0	0.945033	0.941247	0.898568	0.902106	0	0	0	0	0	0	0	0	-10000	10000	0.0249299	0.179078
3758	Q8NC44	Q8NC44	FAM134A	FAM134A	RETREG2	reticulophagy regulator family member 2	2q35	1	1	0	1	0	1	0	0	0	0	0	0	0.945033	0.941247	0	0.902106	0	0.967684	0	0	0	0	0	0	-10000	10000	0.0249299	0.179078
4093	Q969P0-3;Q969P0;Q969P0-2	Q969P0-3	IGSF8	IGSF8	IGSF8	immunoglobulin superfamily member 8	1q23.2	0	0	1	2	1	0	0	0	0	0	0	0	0	0	0.898568	1.80421	0.964474	0	0	0	0	0	0	0	-10000	10000	0.0276531	0.192926
469	O60610;O60610-2;O60610-3;Q8IUG5-2;Q8IUG5	O60610	DIAPH1;MYO18B	DIAPH1	DIAPH1	diaphanous related formin 1	5q31.3	41	36	39	38	29	38	20	28	30	20	34	33	38.7464	33.8849	35.0442	34.28	27.9697	36.772	24.0886	34.4555	30.0801	20.967	34.3928	32.8332	-1.16899	1.16899	0.142391	0.436239
922	P07203;P07203-2	P07203	GPX1	GPX1	GPX1	glutathione peroxidase 1	3p21.31	30	35	43	41	36	34	24	28	36	33	22	24	28.351	32.9437	38.6384	36.9864	34.7211	32.9012	28.9063	34.4555	36.0961	34.5956	22.2542	23.8787	-1.13517	1.13517	0.205879	0.535787
4819	Q9H0U4;Q92928	Q9H0U4	RAB1B;RAB1C	RAB1B	RAB1B	RAB1B, member RAS oncogene family	11q13.2	38	34	40	38	26	31	35	30	31	33	25	25	35.9113	32.0024	35.9427	34.28	25.0763	29.9982	42.155	36.9166	31.0827	34.5956	25.2888	24.8736	1.00881	-1.00881	0.944372	0.976902
2137	P62316;P62316-2	P62316	SNRPD2	SNRPD2	SNRPD2	small nuclear ribonucleoprotein D2 polypeptide	19q13.2-q13.3	32	32	32	39	35	34	20	19	32	29	39	41	30.2411	30.1199	28.7542	35.1821	33.7566	32.9012	24.0886	23.3805	32.0854	30.4022	39.4506	40.7928	-1.00397	1.00397	0.920449	0.971735
3059	Q56VL3;Q56VL3-2	Q56VL3	OCIAD2	OCIAD2	OCIAD2	OCIA domain containing 2	4p11	32	32	40	42	36	34	20	19	34	27	35	33	30.2411	30.1199	35.9427	37.8885	34.7211	32.9012	24.0886	23.3805	34.0907	28.3055	35.4044	32.8332	-1.13313	1.13313	0.279098	0.593308
365	O43390;O43390-2;O43390-3;O43390-4	O43390	HNRNPR	HNRNPR	HNRNPR	heterogeneous nuclear ribonucleoprotein R	1p36.12	37	39	37	37	23	23	28	26	28	41	39	24	34.9662	36.7086	33.247	33.3779	22.1829	22.2567	33.724	31.9944	28.0747	42.9824	39.4506	23.8787	1.09503	-1.09503	0.455287	0.746493
889	P05388;P05388-2;Q8NHW5	P05388	RPLP0;RPLP0P6	RPLP0	RPLP0	ribosomal protein lateral stalk subunit P0	12q24.23	34	37	29	37	28	25	24	20	38	39	34	37	32.1311	34.8261	26.0585	33.3779	27.0053	24.1921	28.9063	24.6111	38.1014	40.8857	34.3928	36.813	1.14707	-1.14707	0.163054	0.471477
1365	P25786;P25786-2	P25786	PSMA1	PSMA1	PSMA1	proteasome subunit alpha 1	11p15.2	37	33	36	32	30	32	25	24	34	33	30	34	34.9662	31.0612	32.3485	28.8674	28.9342	30.9659	30.1107	29.5333	34.0907	34.5956	30.3466	33.8281	1.02865	-1.02865	0.762327	0.923174
2152	P62750	P62750	RPL23A	RPL23A	RPL23A	ribosomal protein L23a	17q11.2	35	32	35	39	27	35	25	24	31	32	28	37	33.0762	30.1199	31.4499	35.1821	26.0408	33.8689	30.1107	29.5333	31.0827	33.5472	28.3235	36.813	-1.00173	1.00173	0.996337	0.997685
2225	P78344;P78344-2	P78344	EIF4G2	EIF4G2	EIF4G2	eukaryotic translation initiation factor 4 gamma 2	11p15.4	33	41	27	26	39	36	20	23	39	34	32	30	31.1861	38.5911	24.2613	23.4548	37.6145	34.8366	24.0886	28.3027	39.1041	35.6439	32.3697	29.8484	-1.0031	1.0031	0.918372	0.971735
1694	P45880;P45880-2;P45880-1	P45880	VDAC2	VDAC2	VDAC2	voltage dependent anion channel 2	10q22.2	32	36	42	43	31	34	27	24	29	29	25	27	30.2411	33.8849	37.7399	38.7906	29.8987	32.9012	32.5196	29.5333	29.0774	30.4022	25.2888	26.8635	-1.17141	1.17141	0.122671	0.403158
2126	P62263	P62263	RPS14	RPS14	RPS14	ribosomal protein S14	5q33.1	33	29	35	37	35	32	25	23	30	26	33	41	31.1861	27.2962	31.4499	33.3779	33.7566	30.9659	30.1107	28.3027	30.0801	27.2571	33.3813	40.7928	1.01006	-1.01006	0.885565	0.966089
4527	Q9BQE3	Q9BQE3	TUBA1C	TUBA1C	TUBA1C	tubulin alpha 1c	12q13.12	27	36	33	38	35	29	27	26	35	31	30	32	25.5159	33.8849	29.6528	34.28	33.7566	28.0628	32.5196	31.9944	35.0934	32.4989	30.3466	31.8383	1.04935	-1.04935	0.649863	0.857561
476	O60716-13;O60716-11;O60716-5;O60716-3;O60716-16;O60716-15;O60716-10;O60716-8;O60716-9;O60716-7;O60716-2;O60716;O60716-21;O60716-19;O60716-14;O60716-12;O60716-6;O60716-4;O60716-24;O60716-23;O60716-18;O60716-17;O60716-22;O60716-20;O60716-29;O60716-27;O60716	O60716-13	CTNND1	CTNND1	CTNND1	catenin delta 1	11q12.1	34	41	41	39	27	27	22	26	32	28	32	29	32.1311	38.5911	36.8413	35.1821	26.0408	26.1275	26.4974	31.9944	32.0854	29.3538	32.3697	28.8534	-1.07596	1.07596	0.487149	0.763086
2586	Q13509;Q13509-2	Q13509	TUBB3	TUBB3	TUBB3	tubulin beta 3 class III	16q24.3	34	39	39	44	32	29	23	21	27	30	27	33	32.1311	36.7086	35.0442	39.6927	30.8632	28.0628	27.7018	25.8416	27.0721	31.4505	27.3119	32.8332	-1.1759	1.1759	0.133023	0.418016
1210	P17844;P17844-2	P17844	DDX5	DDX5	DDX5	DEAD-box helicase 5	17q23.3	36	33	31	30	29	27	29	27	33	39	37	26	34.0212	31.0612	27.8556	27.0632	27.9697	26.1275	34.9284	33.225	33.0881	40.8857	37.4275	25.8686	1.17993	-1.17993	0.12318	0.403746
1893	P51858;P51858-2;P51858-3	P51858	HDGF	HDGF	HDGF	heparin binding growth factor	1q23.1	37	32	35	33	37	36	23	23	30	26	32	33	34.9662	30.1199	31.4499	29.7695	35.6855	34.8366	27.7018	28.3027	30.0801	27.2571	32.3697	32.8332	-1.1024	1.1024	0.389973	0.688215
3643	Q8N163;Q8N163-2	Q8N163	CCAR2	CCAR2	CCAR2	cell cycle and apoptosis regulator 2	8p21.3	31	32	27	24	38	34	32	31	31	34	27	35	29.296	30.1199	24.2613	21.6505	36.65	32.9012	38.5417	38.1472	31.0827	35.6439	27.3119	34.8231	1.17539	-1.17539	0.133921	0.419406
5689	Q9Y266	Q9Y266	NUDC	NUDC	NUDC	nuclear distribution C, dynein complex regulator	1p36.11	38	30	42	37	34	32	23	21	33	26	29	31	35.9113	28.2374	37.7399	33.3779	32.7921	30.9659	27.7018	25.8416	33.0881	27.2571	29.335	30.8433	-1.14338	1.14338	0.224787	0.550764
3247	Q6NZI2;Q6NZI2-2;Q6NZI2-3	Q6NZI2	PTRF	PTRF	CAVIN1	caveolae associated protein 1	17q21.31	23	38	46	39	24	24	29	28	27	30	35	32	21.7358	35.7674	41.3341	35.1821	23.1474	23.2244	34.9284	34.4555	27.0721	31.4505	35.4044	31.8383	1.08181	-1.08181	0.509161	0.783193
1335	P23588;P23588-2	P23588	EIF4B	EIF4B	EIF4B	eukaryotic translation initiation factor 4B	12q13.13	38	39	25	25	35	28	25	27	28	31	39	34	35.9113	36.7086	22.4642	22.5527	33.7566	27.0951	30.1107	33.225	28.0747	32.4989	39.4506	33.8281	1.10477	-1.10477	0.320419	0.638394
4149	Q96BZ9;Q96BZ9-3	Q96BZ9	TBC1D20	TBC1D20	TBC1D20	TBC1 domain family member 20	20p13	1	0	0	1	1	1	0	0	0	0	0	0	0.945033	0	0	0.902106	0.964474	0.967684	0	0	0	0	0	0	-10000	10000	0.0249299	0.179078
4164	Q96CP6-2;Q96CP6-3;Q96CP6	Q96CP6-2	GRAMD1A	GRAMD1A	GRAMD1A	GRAM domain containing 1A	19q13.11	1	1	0	2	0	0	0	0	0	0	0	0	0.945033	0.941247	0	1.80421	0	0	0	0	0	0	0	0	-10000	10000	0.027715	0.192926
1457	P30044-2;P30044;P30044-3;P30044-4	P30044-2	PRDX5	PRDX5	PRDX5	peroxiredoxin 5	11q13.1	40	32	36	36	35	34	24	26	26	24	29	31	37.8013	30.1199	32.3485	32.4758	33.7566	32.9012	28.9063	31.9944	26.0694	25.1604	29.335	30.8433	-1.15724	1.15724	0.167728	0.479836
4241	Q96G74-3;Q96G74-5;Q96G74	Q96G74-3	OTUD5	OTUD5	OTUD5	OTU deubiquitinase 5	Xp11.23	0	1	1	1	0	1	0	0	0	0	0	0	0	0.941247	0.898568	0.902106	0	0.967684	0	0	0	0	0	0	-10000	10000	0.0249299	0.179078
4353	Q96NY9	Q96NY9	MUS81	MUS81	MUS81	MUS81 structure-specific endonuclease subunit	11q13	0	0	1	1	1	1	0	0	0	0	0	0	0	0	0.898568	0.902106	0.964474	0.967684	0	0	0	0	0	0	-10000	10000	0.0249299	0.179078
4487	Q99757	Q99757	TXN2	TXN2	TXN2	thioredoxin 2	22q12.3	1	0	1	0	2	0	0	0	0	0	0	0	0.945033	0	0.898568	0	1.92895	0	0	0	0	0	0	0	-10000	10000	0.0279516	0.193183
3955	Q8WWM7;Q8WWM7-6;Q8WWM7-8;Q8WWM7-5;Q8WWM7-4;Q8WWM7-9;Q8WWM7-2;Q8WWM7-3;Q8WWM7-7	Q8WWM7	ATXN2L	ATXN2L	ATXN2L	ataxin 2 like	16p11.2	31	36	41	28	35	35	21	34	28	31	23	29	29.296	33.8849	36.8413	25.259	33.7566	33.8689	25.293	41.8388	28.0747	32.4989	23.2657	28.8534	-1.07275	1.07275	0.465991	0.754556
4902	Q9H4M9	Q9H4M9	EHD1	EHD1	EHD1	EH domain containing 1	11q13.1	26	28	35	38	31	28	30	35	25	32	31	33	24.5709	26.3549	31.4499	34.28	29.8987	27.0951	36.1328	43.0694	25.0667	33.5472	31.3582	32.8332	1.16331	-1.16331	0.197005	0.526682
1433	P29144	P29144	TPP2	TPP2	TPP2	tripeptidyl peptidase 2	13q33.1	36	30	24	14	45	43	31	35	28	23	31	31	34.0212	28.2374	21.5656	12.6295	43.4013	41.6104	37.3373	43.0694	28.0747	24.1121	31.3582	30.8433	1.07345	-1.07345	0.546224	0.816073
2082	P61254	P61254	RPL26	RPL26	RPL26	ribosomal protein L26	17p13.1	27	29	35	41	27	34	24	24	30	28	31	40	25.5159	27.2962	31.4499	36.9864	26.0408	32.9012	28.9063	29.5333	30.0801	29.3538	31.3582	39.7978	1.04905	-1.04905	0.634493	0.850091
4554	Q9BRT3	Q9BRT3	MIEN1	MIEN1	MIEN1	migration and invasion enhancer 1	17q12	1	0	1	1	0	1	0	0	0	0	0	0	0.945033	0	0.898568	0.902106	0	0.967684	0	0	0	0	0	0	-10000	10000	0.0249299	0.179078
1590	P36776-2;P36776;P36776-3	P36776-2	LONP1	LONP1	LONP1	lon peptidase 1, mitochondrial	19p13.2	24	30	43	49	33	36	30	30	23	27	20	23	22.6808	28.2374	38.6384	44.2032	31.8276	34.8366	36.1328	36.9166	23.0614	28.3055	20.2311	22.8837	-1.19634	1.19634	0.147821	0.446633
4563	Q9BSA4	Q9BSA4	TTYH2	TTYH2	TTYH2	tweety family member 2	17q25.1	2	0	1	0	1	0	0	0	0	0	0	0	1.89007	0	0.898568	0	0.964474	0	0	0	0	0	0	0	-10000	10000	0.027892	0.193091
5158	Q9NTJ3;Q9NTJ3-2	Q9NTJ3	SMC4	SMC4	SMC4	structural maintenance of chromosomes 4	3q25.33	39	27	27	29	32	31	17	19	41	25	45	36	36.8563	25.4137	24.2613	26.1611	30.8632	29.9982	20.4753	23.3805	41.1094	26.2088	45.5199	35.818	1.10924	-1.10924	0.420402	0.715461
4841	Q9H1U4	Q9H1U4	MEGF9	MEGF9	MEGF9	multiple EGF like domains 9	9q33.2	0	1	2	1	0	0	0	0	0	0	0	0	0	0.941247	1.79714	0.902106	0	0	0	0	0	0	0	0	-10000	10000	0.0275944	0.192926
2238	P80723;P80723-2	P80723	BASP1	BASP1	BASP1	brain abundant membrane attached signal protein 1	5p15.1	30	31	33	32	34	35	22	22	33	30	29	36	28.351	29.1787	29.6528	28.8674	32.7921	33.8689	26.4974	27.0722	33.0881	31.4505	29.335	35.818	1.00301	-1.00301	0.915622	0.971735
2748	Q14847;Q14847-2;Q14847-3;O76041-2	Q14847	LASP1;NEBL	LASP1	LASP1	LIM and SH3 protein 1	17q12	35	37	30	34	31	33	26	25	29	28	29	29	33.0762	34.8261	26.957	30.6716	29.8987	31.9336	31.3151	30.7639	29.0774	29.3538	29.335	28.8534	-1.04849	1.04849	0.654342	0.862211
2854	Q15436;Q15436-2	Q15436	SEC23A	SEC23A	SEC23A	Sec23 homolog A, coat complex II component	14q21.1	31	32	29	32	28	29	33	34	29	32	32	25	29.296	30.1199	26.0585	28.8674	27.0053	28.0628	39.7461	41.8388	29.0774	33.5472	32.3697	24.8736	1.18914	-1.18914	0.139403	0.430446
1579	P35998;P35998-2	P35998	PSMC2	PSMC2	PSMC2	proteasome 26S subunit, ATPase 2	7q22.1	28	30	36	33	27	28	25	25	35	36	30	32	26.4609	28.2374	32.3485	29.7695	26.0408	27.0951	30.1107	30.7639	35.0934	37.7407	30.3466	31.8383	1.15264	-1.15264	0.185627	0.509142
255	O14974;O14974-4;O14974-3;O14974-2;O14974-5;O60237-4;O60237	O14974	PPP1R12A;PPP1R12B	PPP1R12A	PPP1R12A	protein phosphatase 1 regulatory subunit 12A	12q21.2-q21.31	25	40	20	20	33	35	31	42	31	28	28	31	23.6258	37.6499	17.9714	18.0421	31.8276	33.8689	37.3373	51.6833	31.0827	29.3538	28.3235	30.8433	1.28001	-1.28001	0.104382	0.37881
1591	P36871;P36871-2;P36871-3	P36871	PGM1	PGM1	PGM1	phosphoglucomutase 1	1p31.3	25	30	37	34	34	31	29	27	27	28	28	34	23.6258	28.2374	33.247	30.6716	32.7921	29.9982	34.9284	33.225	27.0721	29.3538	28.3235	33.8281	1.04569	-1.04569	0.718277	0.900545
2	A0AVT1;A0AVT1-2;A0AVT1-3;A0AVT1-4	A0AVT1	UBA6	UBA6	UBA6	ubiquitin like modifier activating enzyme 6	4q13.2	26	31	33	33	35	36	24	27	26	31	27	33	24.5709	29.1787	29.6528	29.7695	33.7566	34.8366	28.9063	33.225	26.0694	32.4989	27.3119	32.8332	-1.00509	1.00509	0.955238	0.981436
1462	P30050;P30050-2	P30050	RPL12	RPL12	RPL12	ribosomal protein L12	9q33.3	30	30	30	39	33	28	25	23	33	28	24	37	28.351	28.2374	26.957	35.1821	31.8276	27.0951	30.1107	28.3027	33.0881	29.3538	24.2773	36.813	1.02418	-1.02418	0.810947	0.946037
489	O60841	O60841	EIF5B	EIF5B	EIF5B	eukaryotic translation initiation factor 5B	2q11.2	31	30	30	26	33	30	29	32	35	21	28	34	29.296	28.2374	26.957	23.4548	31.8276	29.0305	34.9284	39.3777	35.0934	22.0154	28.3235	33.8281	1.1467	-1.1467	0.226936	0.550764
1119	P14174	P14174	MIF	MIF	MIF	macrophage migration inhibitory factor	22q11.23	27	30	30	32	29	33	23	27	32	28	32	36	25.5159	28.2374	26.957	28.8674	27.9697	31.9336	27.7018	33.225	32.0854	29.3538	32.3697	35.818	1.12434	-1.12434	0.26826	0.580347
4920	Q9H6S3;Q9H6S3-3;Q9H6S3-2	Q9H6S3	EPS8L2	EPS8L2	EPS8L2	EPS8 like 2	11p15.5	33	34	32	36	29	31	24	26	33	30	26	25	31.1861	32.0024	28.7542	32.4758	27.9697	29.9982	28.9063	31.9944	33.0881	31.4505	26.3004	24.8736	-1.03269	1.03269	0.744859	0.915453
4467	Q99623;Q99623-2	Q99623	PHB2	PHB2	PHB2	prohibitin 2	12p13.31	29	33	30	30	28	27	37	35	26	27	28	28	27.406	31.0612	26.957	27.0632	27.0053	26.1275	44.5638	43.0694	26.0694	28.3055	28.3235	27.8585	1.19665	-1.19665	0.143235	0.437691
4842	Q9H1X3-3;P50151;Q9H1X3	Q9H1X3-3	DNAJC25;GNG10	DNAJC25	DNAJC25	DnaJ heat shock protein family (Hsp40) member C25	9q31.3	0	1	1	1	0	1	0	0	0	0	0	0	0	0.941247	0.898568	0.902106	0	0.967684	0	0	0	0	0	0	-10000	10000	0.0249299	0.179078
1332	P23526;P23526-2	P23526	AHCY	AHCY	AHCY	adenosylhomocysteinase	20q11.22	31	29	40	32	29	25	24	28	34	27	26	30	29.296	27.2962	35.9427	28.8674	27.9697	24.1921	28.9063	34.4555	34.0907	28.3055	26.3004	29.8484	1.04807	-1.04807	0.699887	0.889864
1697	P45974-2;P45974	P45974-2	USP5	USP5	USP5	ubiquitin specific peptidase 5	12p13	30	30	16	20	36	39	31	33	37	29	28	25	28.351	28.2374	14.3771	18.0421	34.7211	37.7397	37.3373	40.6083	37.0987	30.4022	28.3235	24.8736	1.23023	-1.23023	0.143953	0.439657
1911	P52597	P52597	HNRNPF	HNRNPF	HNRNPF	heterogeneous nuclear ribonucleoprotein F	10q11.21	29	26	42	32	25	29	20	24	32	28	32	35	27.406	24.4724	37.7399	28.8674	24.1118	28.0628	24.0886	29.5333	32.0854	29.3538	32.3697	34.8231	1.06793	-1.06793	0.523293	0.796649
5897	Q9Y696	Q9Y696	CLIC4	CLIC4	CLIC4	chloride intracellular channel 4	1p36.11	27	41	27	28	28	27	20	16	37	33	32	38	25.5159	38.5911	24.2613	25.259	27.0053	26.1275	24.0886	19.6889	37.0987	34.5956	32.3697	37.8079	1.11327	-1.11327	0.274996	0.587829
282	O15144	O15144	ARPC2	ARPC2	ARPC2	actin related protein 2/3 complex subunit 2	2q35	23	25	37	29	34	29	23	24	33	34	29	32	21.7358	23.5312	33.247	26.1611	32.7921	28.0628	27.7018	29.5333	33.0881	35.6439	29.335	31.8383	1.13055	-1.13055	0.249887	0.574633
2175	P62913	P62913	RPL11	RPL11	RPL11	ribosomal protein L11	1p36.11	38	29	32	37	24	23	23	21	34	39	24	27	35.9113	27.2962	28.7542	33.3779	23.1474	22.2567	27.7018	25.8416	34.0907	40.8857	24.2773	26.8635	1.05222	-1.05222	0.637965	0.850091
4805	Q9H0D6;Q9H0D6-2	Q9H0D6	XRN2	XRN2	XRN2	5'-3' exoribonuclease 2	20p11.22	31	34	30	28	32	29	27	27	27	33	29	24	29.296	32.0024	26.957	25.259	30.8632	28.0628	32.5196	33.225	27.0721	34.5956	29.335	23.8787	1.04747	-1.04747	0.712038	0.89576
2531	Q13177;O75914-2;O75914;O75914-4;O75914-3	Q13177	PAK2;PAK3	PAK2	PAK2	p21 (RAC1) activated kinase 2	3q29	27	32	35	34	29	26	20	24	30	30	29	34	25.5159	30.1199	31.4499	30.6716	27.9697	25.1598	24.0886	29.5333	30.0801	31.4505	29.335	33.8281	1.04347	-1.04347	0.677572	0.877773
2344	Q02878	Q02878	RPL6	RPL6	RPL6	ribosomal protein L6	12q24.13	29	26	29	25	29	34	26	22	26	35	33	35	27.406	24.4724	26.0585	22.5527	27.9697	32.9012	31.3151	27.0722	26.0694	36.6923	33.3813	34.8231	1.17348	-1.17348	0.133297	0.418117
4995	Q9HB40;Q9HB40-2	Q9HB40	SCPEP1	SCPEP1	SCPEP1	serine carboxypeptidase 1	17q22	0	1	0	0	1	2	0	0	0	0	0	0	0	0.941247	0	0	0.964474	1.93537	0	0	0	0	0	0	-10000	10000	0.028197	0.193412
1443	P29590;P29590-5;P29590-9;P29590-3;P29590-8;P29590-4;P29590-11;P29590-12;P29590-13;P29590-14;P29590-10	P29590	PML	PML	PML	promyelocytic leukemia	15q24.1	35	34	20	23	34	33	22	27	32	30	28	29	33.0762	32.0024	17.9714	20.7484	32.7921	31.9336	26.4974	33.225	32.0854	31.4505	28.3235	28.8534	1.07068	-1.07068	0.497128	0.771751
2122	P62249	P62249	RPS16	RPS16	RPS16	ribosomal protein S16	19q13.1	33	30	29	29	34	31	24	18	31	24	29	35	31.1861	28.2374	26.0585	26.1611	32.7921	29.9982	28.9063	22.15	31.0827	25.1604	29.335	34.8231	-1.01736	1.01736	0.945276	0.977076
5554	Q9UKK3	Q9UKK3	PARP4	PARP4	PARP4	poly(ADP-ribose) polymerase family member 4	13q12.12	37	26	34	43	30	30	29	37	19	20	18	23	34.9662	24.4724	30.5513	38.7906	28.9342	29.0305	34.9284	45.5305	19.0507	20.967	18.208	22.8837	-1.15583	1.15583	0.226409	0.550764
1550	P35241;P35241-5;P35241-4;P35241-2;P35241-3	P35241	RDX	RDX	RDX	radixin	11q23	33	25	39	35	25	28	27	24	22	26	34	26	31.1861	23.5312	35.0442	31.5737	24.1118	27.0951	32.5196	29.5333	22.0587	27.2571	34.3928	25.8686	-1.00531	1.00531	0.905311	0.969345
5686	Q9Y262;Q9Y262-2	Q9Y262	EIF3L	EIF3L	EIF3L	eukaryotic translation initiation factor 3 subunit L	22q13.1	28	29	34	30	27	29	19	23	33	30	31	31	26.4609	27.2962	30.5513	27.0632	26.0408	28.0628	22.8841	28.3027	33.0881	31.4505	31.3582	30.8433	1.07525	-1.07525	0.478892	0.762236
1806	P49748-2;P49748;P49748-3	P49748-2	ACADVL	ACADVL	ACADVL	acyl-CoA dehydrogenase very long chain	17p13.1	33	29	31	32	26	30	33	39	25	26	26	13	31.1861	27.2962	27.8556	28.8674	25.0763	29.0305	39.7461	47.9916	25.0667	27.2571	26.3004	12.9343	1.05897	-1.05897	0.964903	0.986624
2390	Q06210-2;Q06210;O94808	Q06210-2	GFPT1;GFPT2	GFPT1	GFPT1	glutamine--fructose-6-phosphate transaminase 1	2p13.3	21	21	42	39	41	40	26	24	20	17	24	28	19.8457	19.7662	37.7399	35.1821	39.5434	38.7073	31.3151	29.5333	20.0534	17.822	24.2773	27.8585	-1.26465	1.26465	0.138702	0.430056
452	O60488-2;O60488	O60488-2	ACSL4	ACSL4	ACSL4	acyl-CoA synthetase long chain family member 4	Xq23	16	16	59	47	25	22	35	30	18	23	27	24	15.1205	15.06	53.0155	42.399	24.1118	21.289	42.155	36.9166	18.048	24.1121	27.3119	23.8787	1.00834	-1.00834	0.78504	0.937098
5024	Q9HCE7-2;Q9HCE7	Q9HCE7-2	SMURF1	SMURF1	SMURF1	SMAD specific E3 ubiquitin protein ligase 1	7q22.1	0	1	1	1	0	1	0	0	0	0	0	0	0	0.941247	0.898568	0.902106	0	0.967684	0	0	0	0	0	0	-10000	10000	0.0249299	0.179078
1979	P55084-2;P55084	P55084-2	HADHB	HADHB	HADHB	hydroxyacyl-CoA dehydrogenase trifunctional multienzyme complex subunit beta	2p23.3	26	25	21	22	37	35	34	42	29	23	22	26	24.5709	23.5312	18.8699	19.8463	35.6855	33.8689	40.9506	51.6833	29.0774	24.1121	22.2542	25.8686	1.24028	-1.24028	0.244395	0.572012
5231	Q9NWT6	Q9NWT6	HIF1AN	HIF1AN	HIF1AN	hypoxia inducible factor 1 alpha subunit inhibitor	10q24.31	1	0	1	1	1	0	0	0	0	0	0	0	0.945033	0	0.898568	0.902106	0.964474	0	0	0	0	0	0	0	-10000	10000	0.0249299	0.179078
2506	Q13045;Q13045-3	Q13045	FLII	FLII	FLII	FLII, actin remodeling protein	17p11.2	39	31	37	29	27	27	22	28	25	19	32	26	36.8563	29.1787	33.247	26.1611	26.0408	26.1275	26.4974	34.4555	25.0667	19.9187	32.3697	25.8686	-1.08183	1.08183	0.44648	0.738601
1140	P14923	P14923	JUP	JUP	JUP	junction plakoglobin	17q21.2	36	37	31	35	27	23	28	23	25	25	26	25	34.0212	34.8261	27.8556	31.5737	26.0408	22.2567	33.724	28.3027	25.0667	26.2088	26.3004	24.8736	-1.07355	1.07355	0.479942	0.762236
5241	Q9NWZ8	Q9NWZ8	GEMIN8	GEMIN8	GEMIN8	gem nuclear organelle associated protein 8	Xp22.2	1	1	0	0	1	1	0	0	0	0	0	0	0.945033	0.941247	0	0	0.964474	0.967684	0	0	0	0	0	0	-10000	10000	0.0249299	0.179078
5730	Q9Y2W1	Q9Y2W1	THRAP3	THRAP3	THRAP3	thyroid hormone receptor associated protein 3	1p34.3	33	35	29	20	25	32	21	30	28	22	31	35	31.1861	32.9437	26.0585	18.0421	24.1118	30.9659	25.293	36.9166	28.0747	23.0637	31.3582	34.8231	1.09933	-1.09933	0.38678	0.685435
2421	Q08257;Q08257-3;Q08257-2	Q08257	CRYZ	CRYZ	CRYZ	crystallin zeta	1p31.1	28	33	33	31	32	29	36	34	23	22	20	19	26.4609	31.0612	29.6528	27.9653	30.8632	28.0628	43.3594	41.8388	23.0614	23.0637	20.2311	18.904	-1.02116	1.02116	0.655169	0.862843
5332	Q9NZR1-2;Q9NZR1	Q9NZR1-2	TMOD2	TMOD2	TMOD2	tropomodulin 2	15q21.2	0	1	2	1	0	0	0	0	0	0	0	0	0	0.941247	1.79714	0.902106	0	0	0	0	0	0	0	0	-10000	10000	0.0275944	0.192926
2785	Q15046;Q15046-2	Q15046	KARS	KARS	KARS	lysyl-tRNA synthetase	16q23.1	27	28	30	33	25	27	25	26	28	28	31	31	25.5159	26.3549	26.957	29.7695	24.1118	26.1275	30.1107	31.9944	28.0747	29.3538	31.3582	30.8433	1.14416	-1.14416	0.239186	0.565618
3514	Q86XP3;Q86XP3-2	Q86XP3	DDX42	DDX42	DDX42	DEAD-box helicase 42	17q23.3	31	33	32	27	31	32	21	21	28	25	29	28	29.296	31.0612	28.7542	24.3569	29.8987	30.9659	25.293	25.8416	28.0747	26.2088	29.335	27.8585	-1.07208	1.07208	0.567572	0.826289
5547	Q9UKA4	Q9UKA4	AKAP11	AKAP11	AKAP11	A-kinase anchoring protein 11	13q14.11	0	0	2	1	0	1	0	0	0	0	0	0	0	0	1.79714	0.902106	0	0.967684	0	0	0	0	0	0	-10000	10000	0.0276513	0.192926
1076	P12004	P12004	PCNA	PCNA	PCNA	proliferating cell nuclear antigen	20p12.3	29	34	30	32	32	29	20	21	30	27	24	29	27.406	32.0024	26.957	28.8674	30.8632	28.0628	24.0886	25.8416	30.0801	28.3055	24.2773	28.8534	-1.07874	1.07874	0.528254	0.800854
1502	P31930	P31930	UQCRC1	UQCRC1	UQCRC1	ubiquinol-cytochrome c reductase core protein 1	3p21.31	26	29	23	29	29	28	31	32	28	27	29	26	24.5709	27.2962	20.6671	26.1611	27.9697	27.0951	37.3373	39.3777	28.0747	28.3055	29.335	25.8686	1.22463	-1.22463	0.0889063	0.343496
2392	Q06323-3;Q06323;Q06323-2	Q06323-3	PSME1	PSME1	PSME1	proteasome activator subunit 1	14q12	25	27	25	27	29	32	21	24	34	29	30	34	23.6258	25.4137	22.4642	24.3569	27.9697	30.9659	25.293	29.5333	34.0907	30.4022	30.3466	33.8281	1.18539	-1.18539	0.111936	0.384421
4062	Q92973-2;Q92973;Q92973-3	Q92973-2	TNPO1	TNPO1	TNPO1	transportin 1	5q13.2	29	30	32	28	37	33	16	21	29	29	29	24	27.406	28.2374	28.7542	25.259	35.6855	31.9336	19.2708	25.8416	29.0774	30.4022	29.335	23.8787	-1.12338	1.12338	0.341382	0.654494
5652	Q9UPN4-3;Q9UPN4-2;Q9UPN4	Q9UPN4-3	CEP131	CEP131	CEP131	centrosomal protein 131	17q25.3	0	2	1	1	0	0	0	0	0	0	0	0	0	1.88249	0.898568	0.902106	0	0	0	0	0	0	0	0	-10000	10000	0.027696	0.192926
1959	P54577	P54577	YARS	YARS	YARS	tyrosyl-tRNA synthetase	1p35.1	24	29	40	36	23	27	13	14	30	31	30	39	22.6808	27.2962	35.9427	32.4758	22.1829	26.1275	15.6576	17.2278	30.0801	32.4989	30.3466	38.8029	-1.01271	1.01271	0.948051	0.977165
2110	P61981	P61981	YWHAG	YWHAG	YWHAG	tyrosine 3-monooxygenase/tryptophan 5-monooxygenase activation protein gamma	7q11.23	33	30	40	40	26	26	21	19	23	25	24	28	31.1861	28.2374	35.9427	36.0842	25.0763	25.1598	25.293	23.3805	23.0614	26.2088	24.2773	27.8585	-1.2106	1.2106	0.0900125	0.345739
5873	Q9Y5X0;Q9Y5X0-2;Q9Y5W9-2;Q9Y5W9	Q9Y5X0	SNX10;SNX11	SNX10	SNX10	sorting nexin 10	7p15.2	0	0	2	1	0	1	0	0	0	0	0	0	0	0	1.79714	0.902106	0	0.967684	0	0	0	0	0	0	-10000	10000	0.0276513	0.192926
1512	P31949	P31949	S100A11	S100A11	S100A11	S100 calcium binding protein A11	1q21.3	29	31	28	36	33	30	26	24	27	21	25	24	27.406	29.1787	25.1599	32.4758	31.8276	29.0305	31.3151	29.5333	27.0721	22.0154	25.2888	23.8787	-1.10041	1.10041	0.365081	0.670529
5635	Q9UNM6;Q9UNM6-2	Q9UNM6	PSMD13	PSMD13	PSMD13	proteasome 26S subunit, non-ATPase 13	11p15.5	31	29	31	33	27	27	22	19	30	25	30	30	29.296	27.2962	27.8556	29.7695	26.0408	26.1275	26.4974	23.3805	30.0801	26.2088	30.3466	29.8484	-1.00014	1.00014	0.96301	0.985535
1377	P26373;P26373-2	P26373	RPL13	RPL13	RPL13	ribosomal protein L13	16q24.3	25	28	29	27	29	26	25	28	32	31	24	29	23.6258	26.3549	26.0585	24.3569	27.9697	25.1598	30.1107	34.4555	32.0854	32.4989	24.2773	28.8534	1.1873	-1.1873	0.138381	0.429287
2173	P62906	P62906	RPL10A	RPL10A	RPL10A	ribosomal protein L10a	6p21.31	25	26	33	32	28	28	25	25	28	26	29	27	23.6258	24.4724	29.6528	28.8674	27.0053	27.0951	30.1107	30.7639	28.0747	27.2571	29.335	26.8635	1.07271	-1.07271	0.562115	0.825504
4613	Q9BUF5	Q9BUF5	TUBB6	TUBB6	TUBB6	tubulin beta 6 class V	18p11.21	26	27	29	27	27	25	13	12	38	35	32	41	24.5709	25.4137	26.0585	24.3569	26.0408	24.1921	15.6576	14.7666	38.1014	36.6923	32.3697	40.7928	1.18421	-1.18421	0.311969	0.628235
1922	P52907	P52907	CAPZA1	CAPZA1	CAPZA1	capping actin protein of muscle Z-line alpha subunit 1	1p13.2	36	35	30	31	31	29	18	13	26	25	30	27	34.0212	32.9437	26.957	27.9653	29.8987	28.0628	21.6797	15.9972	26.0694	26.2088	30.3466	26.8635	-1.22209	1.22209	0.102724	0.373939
3392	Q7Z2W4;Q7Z2W4-2;Q7Z2W4-4;Q7Z2W4-5	Q7Z2W4	ZC3HAV1	ZC3HAV1	ZC3HAV1	zinc finger CCCH-type containing, antiviral 1	7q34	23	22	34	37	26	28	20	24	32	29	28	27	21.7358	20.7074	30.5513	33.3779	25.0763	27.0951	24.0886	29.5333	32.0854	30.4022	28.3235	26.8635	1.08044	-1.08044	0.494077	0.769185
1429	P28838-2;P28838	P28838-2	LAP3	LAP3	LAP3	leucine aminopeptidase 3	4p15.32	16	19	30	34	40	45	29	29	20	21	23	22	15.1205	17.8837	26.957	30.6716	38.579	43.5458	34.9284	35.6861	20.0534	22.0154	23.2657	21.8888	-1.09453	1.09453	0.696645	0.888098
1453	P30040;P30040-2	P30040	ERP29	ERP29	ERP29	endoplasmic reticulum protein 29	12q24.13	34	32	28	30	29	33	20	19	28	22	26	27	32.1311	30.1199	25.1599	27.0632	27.9697	31.9336	24.0886	23.3805	28.0747	23.0637	26.3004	26.8635	-1.14895	1.14895	0.247661	0.574633
281	O15143	O15143	ARPC1B	ARPC1B	ARPC1B	actin related protein 2/3 complex subunit 1B	7q22.1	28	28	24	29	29	28	22	22	26	29	32	30	26.4609	26.3549	21.5656	26.1611	27.9697	27.0951	26.4974	27.0722	26.0694	30.4022	32.3697	29.8484	1.10701	-1.10701	0.349928	0.660046
4439	Q99459	Q99459	CDC5L	CDC5L	CDC5L	cell division cycle 5 like	6p21.1	29	32	29	32	29	31	18	15	28	27	29	28	27.406	30.1199	26.0585	28.8674	27.9697	29.9982	21.6797	18.4583	28.0747	28.3055	29.335	27.8585	-1.1087	1.1087	0.428182	0.718694
1805	P49736	P49736	MCM2	MCM2	MCM2	minichromosome maintenance complex component 2	3q21.3	25	28	15	17	32	32	20	18	36	41	30	32	23.6258	26.3549	13.4785	15.3358	30.8632	30.9659	24.0886	22.15	36.0961	42.9824	30.3466	31.8383	1.33335	-1.33335	0.0605369	0.297095
5916	Q9Y6J9	Q9Y6J9	TAF6L	TAF6L	TAF6L	TATA-box binding protein associated factor 6 like	11q12.3	1	1	1	1	0	0	0	0	0	0	0	0	0.945033	0.941247	0.898568	0.902106	0	0	0	0	0	0	0	0	-10000	10000	0.0249299	0.179078
4890	Q9H4A4	Q9H4A4	RNPEP	RNPEP	RNPEP	arginyl aminopeptidase	1q32.1	32	24	30	33	33	31	26	25	23	25	25	19	30.2411	22.5899	26.957	29.7695	31.8276	29.9982	31.3151	30.7639	23.0614	26.2088	25.2888	18.904	-1.10185	1.10185	0.343895	0.656628
2121	P62244	P62244	RPS15A	RPS15A	RPS15A	ribosomal protein S15a	16p12.3	24	22	26	32	30	23	26	23	36	25	29	29	22.6808	20.7074	23.3628	28.8674	28.9342	22.2567	31.3151	28.3027	36.0961	26.2088	29.335	28.8534	1.22684	-1.22684	0.072786	0.320075
237	O14879	O14879	IFIT3	IFIT3	IFIT3	interferon induced protein with tetratricopeptide repeats 3	10q23.31	2	3	22	21	23	24	0	0	0	0	0	1	1.89007	2.82374	19.7685	18.9442	22.1829	23.2244	0	0	0	0	0	0.994945	-89.2852	89.2852	0.000178853	0.0119889
3315	Q6WCQ1;Q6WCQ1-2;Q6WCQ1-3	Q6WCQ1	MPRIP	MPRIP	MPRIP	myosin phosphatase Rho interacting protein	17p11.2	22	29	41	30	34	40	23	35	18	19	19	14	20.7907	27.2962	36.8413	27.0632	32.7921	38.7073	27.7018	43.0694	18.048	19.9187	19.2195	13.9292	-1.29322	1.29322	0.096412	0.358456
881	P05161	P05161	ISG15	ISG15	ISG15	ISG15 ubiquitin-like modifier	1p36.33	7	4	12	12	22	22	1	0	0	0	0	0	6.61523	3.76499	10.7828	10.8253	21.2184	21.289	1.20443	0	0	0	0	0	-61.8516	61.8516	1.74989e-05	0.00357158
108	O00151	O00151	PDLIM1	PDLIM1	PDLIM1	PDZ and LIM domain 1	10q23.33	42	41	28	29	20	18	15	12	27	31	26	33	39.6914	38.5911	25.1599	26.1611	19.2895	17.4183	18.0664	14.7666	27.0721	32.4989	26.3004	32.8332	-1.09749	1.09749	0.658771	0.864966
1083	P12277	P12277	CKB	CKB	CKB	creatine kinase B	14q32.33	5	5	5	6	28	29	0	1	0	0	0	0	4.72517	4.70624	4.49284	5.41264	27.0053	28.0628	0	1.23055	0	0	0	0	-60.4646	60.4646	0.000232596	0.0141931
3322	Q6YHK3;Q6YHK3-2;Q6YHK3-4;Q6YHK3-3	Q6YHK3	CD109	CD109	CD109	CD109 molecule	6q13	6	10	7	10	2	1	0	1	0	0	0	0	5.6702	9.41247	6.28998	9.02106	1.92895	0.967684	0	1.23055	0	0	0	0	-27.0531	27.0531	0.000249954	0.0147948
2829	Q15293;Q15293-2	Q15293	RCN1	RCN1	RCN1	reticulocalbin 1	11p13	27	27	32	29	31	24	21	24	25	27	23	31	25.5159	25.4137	28.7542	26.1611	29.8987	23.2244	25.293	29.5333	25.0667	28.3055	23.2657	30.8433	1.02101	-1.02101	0.868433	0.96144
3476	Q86V48;Q86V48-2;Q86V48-3	Q86V48	LUZP1	LUZP1	LUZP1	leucine zipper protein 1	1p36.12	34	36	30	19	20	26	10	15	32	33	32	34	32.1311	33.8849	26.957	17.14	19.2895	25.1598	12.0443	18.4583	32.0854	34.5956	32.3697	33.8281	1.05706	-1.05706	0.740439	0.913317
2053	P60900;P60900-2;P60900-3	P60900	PSMA6	PSMA6	PSMA6	proteasome subunit alpha 6	14q13.2	27	28	30	27	26	24	28	24	25	25	28	28	25.5159	26.3549	26.957	24.3569	25.0763	23.2244	33.724	29.5333	25.0667	26.2088	28.3235	27.8585	1.12694	-1.12694	0.328293	0.644499
2069	P61088;Q5JXB2	P61088	UBE2N;UBE2NL	UBE2N	UBE2N	ubiquitin conjugating enzyme E2 N	12q22	32	25	25	26	33	27	23	18	26	21	28	35	30.2411	23.5312	22.4642	23.4548	31.8276	26.1275	27.7018	22.15	26.0694	22.0154	28.3235	34.8231	1.0218	-1.0218	0.794144	0.941427
2310	Q01469;A8MUU1	Q01469	FABP5;FABP5P3	FABP5	FABP5	fatty acid binding protein 5	8q21.13	30	28	29	39	26	25	17	14	29	22	30	30	28.351	26.3549	26.0585	35.1821	25.0763	24.1921	20.4753	17.2278	29.0774	23.0637	30.3466	29.8484	-1.10115	1.10115	0.470454	0.757513
685	O95155-2;O95155;O95155-4;O95155-3	O95155-2	UBE4B	UBE4B	UBE4B	ubiquitination factor E4B	1p36.22	8	5	2	1	5	4	0	0	1	0	0	0	7.56027	4.70624	1.79714	0.902106	4.82237	3.87073	0	0	1.00267	0	0	0	-23.5959	23.5959	0.000228713	0.0141016
1499	P31689;P31689-2	P31689	DNAJA1	DNAJA1	DNAJA1	DnaJ heat shock protein family (Hsp40) member A1	9p21.1	32	26	31	32	22	22	18	18	28	27	27	33	30.2411	24.4724	27.8556	28.8674	21.2184	21.289	21.6797	22.15	28.0747	28.3055	27.3119	32.8332	1.04165	-1.04165	0.676051	0.876571
2950	Q16787-3;Q16787;Q16787-4;Q16787-1	Q16787-3	LAMA3	LAMA3	LAMA3	laminin subunit alpha 3	18q11.2	3	3	11	12	9	9	0	0	1	0	0	1	2.8351	2.82374	9.88425	10.8253	8.68027	8.70915	0	0	1.00267	0	0	0.994945	-21.905	21.905	3.63257e-05	0.00528665
2086	P61353	P61353	RPL27	RPL27	RPL27	ribosomal protein L27	17q21	29	28	32	27	30	24	19	20	33	24	25	24	27.406	26.3549	28.7542	24.3569	28.9342	23.2244	22.8841	24.6111	33.0881	25.1604	25.2888	23.8787	-1.02659	1.02659	0.850367	0.955672
2143	P62424	P62424	RPL7A	RPL7A	RPL7A	ribosomal protein L7a	9q34.2	25	28	31	28	23	22	22	28	23	27	27	30	23.6258	26.3549	27.8556	25.259	22.1829	21.289	26.4974	34.4555	23.0614	28.3055	27.3119	29.8484	1.15633	-1.15633	0.236505	0.561973
2227	P78347-2;P78347-4;P78347-3;P78347;P78347-5;Q86UP8-3;Q86UP8;Q6EKJ0	P78347-2	GTF2I;GTF2IRD2;GTF2IRD2B	GTF2I	GTF2I	general transcription factor IIi	7q11.23	23	32	37	28	26	28	16	19	25	27	26	27	21.7358	30.1199	33.247	25.259	25.0763	27.0951	19.2708	23.3805	25.0667	28.3055	26.3004	26.8635	-1.08946	1.08946	0.495391	0.77042
1106	P13693;P13693-2;Q9HAU6;Q56UQ5	P13693	TPT1;TPT1P8	TPT1	TPT1	tumor protein, translationally-controlled 1	13q14.13	33	29	30	31	19	29	21	16	32	28	19	26	31.1861	27.2962	26.957	27.9653	18.325	28.0628	25.293	19.6889	32.0854	29.3538	19.2195	25.8686	-1.05467	1.05467	0.677224	0.87761
1281	P21281	P21281	ATP6V1B2	ATP6V1B2	ATP6V1B2	ATPase H+ transporting V1 subunit B2	8p21.3	27	31	36	30	30	29	22	19	24	22	19	24	25.5159	29.1787	32.3485	27.0632	28.9342	28.0628	26.4974	23.3805	24.064	23.0637	19.2195	23.8787	-1.22126	1.22126	0.0829663	0.32918
2051	P60866;P60866-2	P60866	RPS20	RPS20	RPS20	ribosomal protein S20	8q12.1	24	27	26	32	26	26	19	18	29	26	29	31	22.6808	25.4137	23.3628	28.8674	25.0763	25.1598	22.8841	22.15	29.0774	27.2571	29.335	30.8433	1.07297	-1.07297	0.496607	0.771751
1629	P40763-2	P40763-2	STAT3	STAT3	STAT3	signal transducer and activator of transcription 3	17q21.2	26	30	30	30	32	29	22	22	23	22	22	24	24.5709	28.2374	26.957	27.0632	30.8632	28.0628	26.4974	27.0722	23.0614	23.0637	22.2542	23.8787	-1.13665	1.13665	0.257963	0.574633
2114	P62136;P62136-2;P62136-3	P62136	PPP1CA	PPP1CA	PPP1CA	protein phosphatase 1 catalytic subunit alpha	11q13	24	28	37	34	32	26	17	14	23	21	31	25	22.6808	26.3549	33.247	30.6716	30.8632	25.1598	20.4753	17.2278	23.0614	22.0154	31.3582	24.8736	-1.21556	1.21556	0.113733	0.385781
3823	Q8NHU6;Q8NHU6-2;Q8NHU6-3	Q8NHU6	TDRD7	TDRD7	TDRD7	tudor domain containing 7	9q22.33	5	4	11	14	8	8	1	0	0	0	0	1	4.72517	3.76499	9.88425	12.6295	7.71579	7.74147	1.20443	0	0	0	0	0.994945	-21.1247	21.1247	6.78124e-06	0.00191134
2663	Q14151;Q14151-2	Q14151	SAFB2	SAFB2	SAFB2	scaffold attachment factor B2	19p13.3	28	33	32	22	29	24	24	30	21	27	20	21	26.4609	31.0612	28.7542	19.8463	27.9697	23.2244	28.9063	36.9166	21.056	28.3055	20.2311	20.8939	-1.00645	1.00645	0.84251	0.953907
175	O00567	O00567	NOP56	NOP56	NOP56	NOP56 ribonucleoprotein	20p13	31	29	27	26	25	26	19	23	30	29	29	16	29.296	27.2962	24.2613	23.4548	24.1118	25.1598	22.8841	28.3027	30.0801	30.4022	29.335	15.9191	1.02177	-1.02177	0.862754	0.960987
1637	P41091;Q2VIR3;Q2VIR3-2	P41091	EIF2S3;EIF2S3L	EIF2S3	EIF2S3	eukaryotic translation initiation factor 2 subunit gamma	Xp22.11	18	25	27	29	28	27	21	22	26	28	27	32	17.0106	23.5312	24.2613	26.1611	27.0053	26.1275	25.293	27.0722	26.0694	29.3538	27.3119	31.8383	1.15852	-1.15852	0.198609	0.528526
3373	Q7L576;Q7L576-2;Q7L576-3	Q7L576	CYFIP1	CYFIP1	CYFIP1	cytoplasmic FMR1 interacting protein 1	15q11.2	33	24	37	24	26	32	18	25	21	19	21	30	31.1861	22.5899	33.247	21.6505	25.0763	30.9659	21.6797	30.7639	21.056	19.9187	21.2426	29.8484	-1.13983	1.13983	0.253265	0.574633
258	O14979-3;O14979-2	O14979-3	HNRNPDL	HNRNPDL	HNRNPDL	heterogeneous nuclear ribonucleoprotein D like	4q21.22	26	32	23	23	25	25	24	21	26	29	28	27	24.5709	30.1199	20.6671	20.7484	24.1118	24.1921	28.9063	25.8416	26.0694	30.4022	28.3235	26.8635	1.15232	-1.15232	0.218879	0.543432
723	O95373	O95373	IPO7	IPO7	IPO7	importin 7	11p15.4	20	26	30	35	30	33	18	18	19	25	23	31	18.9007	24.4724	26.957	31.5737	28.9342	31.9336	21.6797	22.15	19.0507	26.2088	23.2657	30.8433	-1.13669	1.13669	0.295997	0.61152
4085	Q969F9-2;Q969F9	Q969F9-2	HPS3	HPS3	HPS3	HPS3, biogenesis of lysosomal organelles complex 2 subunit 1	3q24	5	3	3	2	3	4	0	0	0	0	0	1	4.72517	2.82374	2.6957	1.80421	2.89342	3.87073	0	0	0	0	0	0.994945	-18.9086	18.9086	5.66419e-05	0.00684211
1899	P52209-2;P52209	P52209-2	PGD	PGD	PGD	phosphogluconate dehydrogenase	1p36.22	21	26	29	27	31	31	19	21	26	26	26	25	19.8457	24.4724	26.0585	24.3569	29.8987	29.9982	22.8841	25.8416	26.0694	27.2571	26.3004	24.8736	-1.00916	1.00916	0.964955	0.986624
4483	Q99733;Q99733-2	Q99733	NAP1L4	NAP1L4	NAP1L4	nucleosome assembly protein 1 like 4	11p15.4	28	26	27	26	23	30	22	21	27	21	27	30	26.4609	24.4724	24.2613	23.4548	22.1829	29.0305	26.4974	25.8416	27.0721	22.0154	27.3119	29.8484	1.05821	-1.05821	0.613492	0.839281
443	O60313-2;O60313	O60313-2	OPA1	OPA1	OPA1	OPA1, mitochondrial dynamin like GTPase	3q29	24	27	31	35	27	29	24	24	26	19	22	19	22.6808	25.4137	27.8556	31.5737	26.0408	28.0628	28.9063	29.5333	26.0694	19.9187	22.2542	18.904	-1.11019	1.11019	0.321056	0.638981
4482	Q99729-3;Q99729-2;Q99729-4;Q99729	Q99729-3	HNRNPAB	HNRNPAB	HNRNPAB	heterogeneous nuclear ribonucleoprotein A/B	5q35.3	27	34	24	26	28	26	18	14	29	27	26	28	25.5159	32.0024	21.5656	23.4548	27.0053	25.1598	21.6797	17.2278	29.0774	28.3055	26.3004	27.8585	-1.02828	1.02828	0.90896	0.970886
1730	P47755;P47755-2	P47755	CAPZA2	CAPZA2	CAPZA2	capping actin protein of muscle Z-line alpha subunit 2	7q31.2	25	32	26	34	31	25	24	20	19	20	26	23	23.6258	30.1199	23.3628	30.6716	29.8987	24.1921	28.9063	24.6111	19.0507	20.967	26.3004	22.8837	-1.13419	1.13419	0.265106	0.576959
1826	P49915-2;P49915	P49915-2	GMPS	GMPS	GMPS	guanine monophosphate synthase	3q25.31	29	27	38	29	25	26	17	14	23	25	29	23	27.406	25.4137	34.1456	26.1611	24.1118	25.1598	20.4753	17.2278	23.0614	26.2088	29.335	22.8837	-1.16672	1.16672	0.21752	0.542106
2325	Q01995	Q01995	TAGLN	TAGLN	TAGLN	transgelin	11q23.2	39	26	19	10	4	3	2	1	51	62	41	47	36.8563	24.4724	17.0728	9.02106	3.8579	2.90305	2.40886	1.23055	51.1361	64.9978	41.4737	46.7624	2.20855	-2.20855	0.510406	0.784495
4046	Q92878;Q92878-2;Q92878-3	Q92878	RAD50	RAD50	RAD50	RAD50 double strand break repair protein	5q31.1	28	26	35	40	26	23	17	23	24	15	22	26	26.4609	24.4724	31.4499	36.0842	25.0763	22.2567	20.4753	28.3027	24.064	15.7253	22.2542	25.8686	-1.21297	1.21297	0.0946626	0.3553
1420	P28331;P28331-2;P28331-4;P28331-5;P28331-3	P28331	NDUFS1	NDUFS1	NDUFS1	NADH:ubiquinone oxidoreductase core subunit S1	2q33.3	25	23	29	33	18	20	41	35	12	23	23	22	23.6258	21.6487	26.0585	29.7695	17.3605	19.3537	49.3815	43.0694	12.032	24.1121	23.2657	21.8888	1.26073	-1.26073	0.440465	0.732298
5614	Q9UM54-6;Q9UM54-4;Q9UM54-1;Q9UM54;Q9UM54-5;Q9UM54-2	Q9UM54-6	MYO6	MYO6	MYO6	myosin VI	6q14.1	38	31	34	24	27	24	25	23	19	15	22	22	35.9113	29.1787	30.5513	21.6505	26.0408	23.2244	30.1107	28.3027	19.0507	15.7253	22.2542	21.8888	-1.2128	1.2128	0.0870521	0.338086
259	O14980	O14980	XPO1	XPO1	XPO1	exportin 1	2p15	25	34	25	29	30	31	17	15	20	31	23	23	23.6258	32.0024	22.4642	26.1611	28.9342	29.9982	20.4753	18.4583	20.0534	32.4989	23.2657	22.8837	-1.18564	1.18564	0.17356	0.489423
2153	P62753	P62753	RPS6	RPS6	RPS6	ribosomal protein S6	9p22.1	29	27	27	27	24	23	22	19	23	23	28	31	27.406	25.4137	24.2613	24.3569	23.1474	22.2567	26.4974	23.3805	23.0614	24.1121	28.3235	30.8433	1.06385	-1.06385	0.586375	0.835776
2886	Q15717;Q15717-2;Q12926-2;Q12926;P26378-4;P26378-2;P26378-5;P26378;P26378-3	Q15717	ELAVL1;ELAVL2;ELAVL4	ELAVL1	ELAVL1	ELAV like RNA binding protein 1	19p13.2	29	28	30	30	24	25	21	24	18	25	23	25	27.406	26.3549	26.957	27.0632	23.1474	24.1921	25.293	29.5333	18.048	26.2088	23.2657	24.8736	-1.05365	1.05365	0.605138	0.839028
4229	Q96FQ6	Q96FQ6	S100A16	S100A16	S100A16	S100 calcium binding protein A16	1q21.3	28	25	28	29	33	28	26	23	22	17	21	22	26.4609	23.5312	25.1599	26.1611	31.8276	27.0951	31.3151	28.3027	22.0587	17.822	21.2426	21.8888	-1.12344	1.12344	0.28085	0.596038
2356	Q03405;Q03405-3	Q03405	PLAUR	PLAUR	PLAUR	plasminogen activator, urokinase receptor	19q13	2	3	5	6	0	1	0	0	1	0	0	0	1.89007	2.82374	4.49284	5.41264	0	0.967684	0	0	1.00267	0	0	0	-15.5455	15.5455	0.00429428	0.0648415
948	P07954-2;P07954	P07954-2	FH	FH	FH	fumarate hydratase	1q43	17	26	29	30	23	27	26	26	28	20	24	25	16.0656	24.4724	26.0585	27.0632	22.1829	26.1275	31.3151	31.9944	28.0747	20.967	24.2773	24.8736	1.13758	-1.13758	0.319405	0.63741
1859	P50995-2;P50995;P27216;P27216-2	P50995-2	ANXA11;ANXA13	ANXA11	ANXA11	annexin A11	10q22.3	25	24	34	32	27	26	19	18	26	25	19	26	23.6258	22.5899	30.5513	28.8674	26.0408	25.1598	22.8841	22.15	26.0694	26.2088	19.2195	25.8686	-1.10137	1.10137	0.422265	0.716772
4175	Q96D71-3;Q96D71;Q96D71-2;Q96D71-4	Q96D71-3	REPS1	REPS1	REPS1	RALBP1 associated Eps domain containing 1	6q24.1	4	3	1	1	3	4	0	0	0	0	1	0	3.78013	2.82374	0.898568	0.902106	2.89342	3.87073	0	0	0	0	1.01155	0	-14.9955	14.9955	0.000576886	0.0221726
1211	P17858;P17858-2	P17858	PFKL	PFKL	PFKL	phosphofructokinase, liver type	21q22.3	21	21	27	27	34	29	27	29	24	19	22	19	19.8457	19.7662	24.2613	24.3569	32.7921	28.0628	32.5196	35.6861	24.064	19.9187	22.2542	18.904	1.02858	-1.02858	0.92843	0.973239
1569	P35613-2;P35613;P35613-3;P35613-4	P35613-2	BSG	BSG	BSG	basigin (Ok blood group)	19p13.3	19	21	30	25	26	29	24	27	24	24	24	26	17.9556	19.7662	26.957	22.5527	25.0763	28.0628	28.9063	33.225	24.064	25.1604	24.2773	25.8686	1.15054	-1.15054	0.269536	0.582257
1111	P13798	P13798	APEH	APEH	APEH	acylaminoacyl-peptide hydrolase	3p21.31	29	23	30	27	20	21	29	28	20	26	24	21	27.406	21.6487	26.957	24.3569	19.2895	20.3214	34.9284	34.4555	20.0534	27.2571	24.2773	20.8939	1.15635	-1.15635	0.297602	0.612899
1816	P49790;P49790-3;P49790-2	P49790	NUP153	NUP153	NUP153	nucleoporin 153	6p22.3	30	27	21	20	27	22	17	17	32	26	32	27	28.351	25.4137	18.8699	18.0421	26.0408	21.289	20.4753	20.9194	32.0854	27.2571	32.3697	26.8635	1.15915	-1.15915	0.171608	0.486111
2651	Q14019	Q14019	COTL1	COTL1	COTL1	coactosin like F-actin binding protein 1	16q24.1	28	21	30	28	25	22	18	16	29	20	28	32	26.4609	19.7662	26.957	25.259	24.1118	21.289	21.6797	19.6889	29.0774	20.967	28.3235	31.8383	1.05374	-1.05374	0.603184	0.838285
5918	Q9Y6K8;Q9Y6K8-3;Q9Y6K8-2	Q9Y6K8	AK5	AK5	AK5	adenylate kinase 5	1p31.1	9	9	17	15	13	14	2	2	0	0	0	0	8.5053	8.47123	15.2757	13.5316	12.5382	13.5476	2.40886	2.46111	0	0	0	0	-14.7577	14.7577	9.71086e-07	0.000718483
5194	Q9NVA2;Q9NVA2-2	Q9NVA2	SEPT11	SEPT11	SEPT11	septin 11	4q21.1	22	28	24	23	25	24	18	22	30	28	26	27	20.7907	26.3549	21.5656	20.7484	24.1118	23.2244	21.6797	27.0722	30.0801	29.3538	26.3004	26.8635	1.17949	-1.17949	0.153661	0.452722
4351	Q96NW4	Q96NW4	ANKRD27	ANKRD27	ANKRD27	ankyrin repeat domain 27	19q13.11	2	1	5	4	2	2	0	0	1	0	0	0	1.89007	0.941247	4.49284	3.60842	1.92895	1.93537	0	0	1.00267	0	0	0	-14.7575	14.7575	0.000532951	0.0213145
2264	P84103-2;P84103	P84103-2	SRSF3	SRSF3	SRSF3	serine and arginine rich splicing factor 3	6p21.31-p21.2	31	25	27	28	20	19	27	25	26	27	18	23	29.296	23.5312	24.2613	25.259	19.2895	18.386	32.5196	30.7639	26.0694	28.3055	18.208	22.8837	1.13374	-1.13374	0.354209	0.663933
4730	Q9BZ29-5;Q9BZ29-6	Q9BZ29-5	DOCK9	DOCK9	DOCK9	dedicator of cytokinesis 9	13q32.3	19	15	20	27	13	12	0	0	2	0	3	2	17.9556	14.1187	17.9714	24.3569	12.5382	11.6122	0	0	2.00534	0	3.03466	1.98989	-14.0191	14.0191	7.50065e-07	0.000718483
2078	P61224-3;P61224;P61224-2;P61224-4;A6NIZ1	P61224-3	RAP1B	RAP1B	RAP1B	RAP1B, member of RAS oncogene family	12q15	32	27	32	28	22	21	20	16	32	26	18	21	30.2411	25.4137	28.7542	25.259	21.2184	20.3214	24.0886	19.6889	32.0854	27.2571	18.208	20.8939	-1.06318	1.06318	0.617614	0.841148
2700	Q14444;Q14444-2	Q14444	CAPRIN1	CAPRIN1	CAPRIN1	cell cycle associated protein 1	11p13	30	28	18	22	24	24	19	18	32	24	31	25	28.351	26.3549	16.1742	19.8463	23.1474	23.2244	22.8841	22.15	32.0854	25.1604	31.3582	24.8736	1.15619	-1.15619	0.189985	0.517496
5562	Q9UKV3-5;Q9UKV3;Q9UKV3-3;Q9UKV3-2	Q9UKV3-5	ACIN1	ACIN1	ACIN1	apoptotic chromatin condensation inducer 1	14q11.2	30	28	26	29	25	25	16	21	23	23	26	23	28.351	26.3549	23.3628	26.1611	24.1118	24.1921	19.2708	25.8416	23.0614	24.1121	26.3004	22.8837	-1.0782	1.0782	0.542324	0.812868
2806	Q15147-4;Q15147;Q15147-5;Q15147-2	Q15147-4	PLCB4	PLCB4	PLCB4	phospholipase C beta 4	20p12.3-p12.2	26	28	34	20	30	29	17	19	24	19	24	24	24.5709	26.3549	30.5513	18.0421	28.9342	28.0628	20.4753	23.3805	24.064	19.9187	24.2773	23.8787	-1.1509	1.1509	0.262524	0.574633
609	O75874	O75874	IDH1	IDH1	IDH1	isocitrate dehydrogenase (NADP(+)) 1, cytosolic	2q34	25	20	37	35	24	24	23	21	24	20	18	22	23.6258	18.8249	33.247	31.5737	23.1474	23.2244	27.7018	25.8416	24.064	20.967	18.208	21.8888	-1.10797	1.10797	0.344521	0.656753
4052	Q92896;Q92896-3;Q92896-2	Q92896	GLG1	GLG1	GLG1	golgi glycoprotein 1	16q23.1	26	25	38	35	21	23	22	23	19	12	26	23	24.5709	23.5312	34.1456	31.5737	20.254	22.2567	26.4974	28.3027	19.0507	12.5802	26.3004	22.8837	-1.15276	1.15276	0.227665	0.550764
3233	Q6NSJ5	Q6NSJ5	LRRC8E	LRRC8E	LRRC8E	leucine rich repeat containing 8 VRAC subunit E	19p13.2	1	0	4	6	2	2	0	0	0	0	0	1	0.945033	0	3.59427	5.41264	1.92895	1.93537	0	0	0	0	0	0.994945	-13.8864	13.8864	0.00593158	0.0814191
5780	Q9Y3F4;Q9Y3F4-2	Q9Y3F4	STRAP	STRAP	STRAP	serine/threonine kinase receptor associated protein	12p12.3	28	28	21	22	27	29	16	21	20	20	30	30	26.4609	26.3549	18.8699	19.8463	26.0408	28.0628	19.2708	25.8416	20.0534	20.967	30.3466	29.8484	1.00475	-1.00475	0.912552	0.971735
1612	P39023;Q92901	P39023	RPL3;RPL3L	RPL3	RPL3	ribosomal protein L3	22q13.1	22	23	28	25	22	22	18	22	26	29	26	28	20.7907	21.6487	25.1599	22.5527	21.2184	21.289	21.6797	27.0722	26.0694	30.4022	26.3004	27.8585	1.20144	-1.20144	0.125298	0.405934
1513	P32004-3;P32004-2;P32004	P32004-3	L1CAM	L1CAM	L1CAM	L1 cell adhesion molecule	Xq28	15	14	38	38	22	17	2	2	1	2	1	1	14.1755	13.1775	34.1456	34.28	21.2184	16.4506	2.40886	2.46111	1.00267	2.0967	1.01155	0.994945	-13.3771	13.3771	3.6772e-06	0.00120919
4130	Q96AZ6;Q96AZ6-2	Q96AZ6	ISG20	ISG20	ISG20	interferon stimulated exonuclease gene 20	15q26.1	1	2	3	4	3	4	1	0	0	0	0	0	0.945033	1.88249	2.6957	3.60842	2.89342	3.87073	1.20443	0	0	0	0	0	-13.1978	13.1978	0.000255341	0.014964
2157	P62829	P62829	RPL23	RPL23	RPL23	ribosomal protein L23	17q12	25	20	32	31	31	22	17	13	23	18	26	32	23.6258	18.8249	28.7542	27.9653	29.8987	21.289	20.4753	15.9972	23.0614	18.8703	26.3004	31.8383	-1.10118	1.10118	0.484608	0.762236
232	O14818;O14818-2;O14818-4;Q8TAA3-2;Q8TAA3-5;Q8TAA3	O14818	PSMA7;PSMA8	PSMA7	PSMA7	proteasome subunit alpha 7	20q13.33	28	30	21	23	22	19	24	22	26	29	23	22	26.4609	28.2374	18.8699	20.7484	21.2184	18.386	28.9063	27.0722	26.0694	30.4022	23.2657	21.8888	1.17685	-1.17685	0.190208	0.517664
4231	Q96FV2-2;Q96FV2	Q96FV2-2	SCRN2	SCRN2	SCRN2	secernin 2	17q21	4	1	3	4	1	1	0	0	1	0	0	0	3.78013	0.941247	2.6957	3.60842	0.964474	0.967684	0	0	1.00267	0	0	0	-12.9232	12.9232	0.0015864	0.0398031
409	O43795-2;O43795	O43795-2	MYO1B	MYO1B	MYO1B	myosin IB	2q32.3	22	31	33	23	19	25	16	21	24	26	20	28	20.7907	29.1787	29.6528	20.7484	18.325	24.1921	19.2708	25.8416	24.064	27.2571	20.2311	27.8585	1.01145	-1.01145	0.915346	0.971735
1485	P30622-2	P30622-2	CLIP1	CLIP1	CLIP1	CAP-Gly domain containing linker protein 1	12q24.31	30	27	26	27	24	27	22	23	21	23	19	19	28.351	25.4137	23.3628	24.3569	23.1474	26.1275	26.4974	28.3027	21.056	24.1121	19.2195	18.904	-1.09173	1.09173	0.41581	0.712915
1546	P35222;P35222-2	P35222	CTNNB1	CTNNB1	CTNNB1	catenin beta 1	3p22.1	22	30	24	24	28	26	11	12	32	29	28	21	20.7907	28.2374	21.5656	21.6505	27.0053	25.1598	13.2487	14.7666	32.0854	30.4022	28.3235	20.8939	-1.03356	1.03356	0.892745	0.966089
1841	P50502;Q8NFI4;Q8IZP2	P50502	ST13;ST13P5;ST13P4	ST13	ST13	ST13, Hsp70 interacting protein	22q13.2	29	27	33	29	25	24	16	22	22	20	18	22	27.406	25.4137	29.6528	26.1611	24.1118	23.2244	19.2708	27.0722	22.0587	20.967	18.208	21.8888	-1.20472	1.20472	0.116919	0.39343
2978	Q2PPJ7-3;Q2PPJ7-2;Q2PPJ7	Q2PPJ7-3	RALGAPA2	RALGAPA2	RALGAPA2	Ral GTPase activating protein catalytic alpha subunit 2	20p11.23	1	1	4	7	3	1	0	1	0	0	0	0	0.945033	0.941247	3.59427	6.31474	2.89342	0.967684	0	1.23055	0	0	0	0	-12.7231	12.7231	0.00273607	0.0506088
2166	P62873;P62873-2;P16520-2;P16520	P62873	GNB1;GNB3	GNB1	GNB1	G protein subunit beta 1	1p36.33	25	30	28	23	26	25	15	16	24	25	24	25	23.6258	28.2374	25.1599	20.7484	25.0763	24.1921	18.0664	19.6889	24.064	26.2088	24.2773	24.8736	-1.07188	1.07188	0.627198	0.848158
5148	Q9NSE4	Q9NSE4	IARS2	IARS2	IARS2	isoleucyl-tRNA synthetase 2, mitochondrial	1q41	26	26	26	28	29	33	24	27	15	19	20	13	24.5709	24.4724	23.3628	25.259	27.9697	31.9336	28.9063	33.225	15.04	19.9187	20.2311	12.9343	-1.20969	1.20969	0.105832	0.382896
547	O75390	O75390	CS	CS	CS	citrate synthase	12q13.3	30	25	24	24	26	24	19	25	21	21	22	24	28.351	23.5312	21.5656	21.6505	25.0763	23.2244	22.8841	30.7639	21.056	22.0154	22.2542	23.8787	-1.00383	1.00383	0.935984	0.973654
4348	Q96ND0	Q96ND0	FAM210A	FAM210A	FAM210A	family with sequence similarity 210 member A	18p11.21	4	2	6	6	4	4	0	0	1	0	1	0	3.78013	1.88249	5.39141	5.41264	3.8579	3.87073	0	0	1.00267	0	1.01155	0	-12.0122	12.0122	4.2379e-05	0.00557425
1772	P49189;P49189-2	P49189	ALDH9A1	ALDH9A1	ALDH9A1	aldehyde dehydrogenase 9 family member A1	1q24.1	11	19	25	24	29	28	32	33	19	22	21	21	10.3954	17.8837	22.4642	21.6505	27.9697	27.0951	38.5417	40.6083	19.0507	23.0637	21.2426	20.8939	1.28199	-1.28199	0.200555	0.529704
2170	P62888	P62888	RPL30	RPL30	RPL30	ribosomal protein L30	8q22.2	24	22	23	25	27	28	16	17	27	23	25	27	22.6808	20.7074	20.6671	22.5527	26.0408	27.0951	19.2708	20.9194	27.0721	24.1121	25.2888	26.8635	1.02707	-1.02707	0.755322	0.920855
4686	Q9BXJ9;Q9BXJ9-4	Q9BXJ9	NAA15	NAA15	NAA15	N(alpha)-acetyltransferase 15, NatA auxiliary subunit	4q31.1	17	22	19	24	29	35	16	16	30	26	26	24	16.0656	20.7074	17.0728	21.6505	27.9697	33.8689	19.2708	19.6889	30.0801	27.2571	26.3004	23.8787	1.06656	-1.06656	0.524099	0.797055
2414	Q07954	Q07954	LRP1	LRP1	LRP1	LDL receptor related protein 1	12q13.3	9	8	6	11	12	12	2	1	1	0	0	0	8.5053	7.52998	5.39141	9.92317	11.5737	11.6122	2.40886	1.23055	1.00267	0	0	0	-11.7481	11.7481	1.85125e-06	0.000795959
1861	P51114;P51114-2;P51114-3	P51114	FXR1	FXR1	FXR1	FMR1 autosomal homolog 1	3q26.33	28	25	33	31	23	23	11	13	23	28	28	17	26.4609	23.5312	29.6528	27.9653	22.1829	22.2567	13.2487	15.9972	23.0614	29.3538	28.3235	16.9141	-1.1982	1.1982	0.167114	0.479344
2436	Q08J23;Q08J23-2;Q08J23-3	Q08J23	NSUN2	NSUN2	NSUN2	NOP2/Sun RNA methyltransferase family member 2	5p15.31	24	23	19	18	31	34	19	17	25	27	23	23	22.6808	21.6487	17.0728	16.2379	29.8987	32.9012	22.8841	20.9194	25.0667	28.3055	23.2657	22.8837	1.02054	-1.02054	0.789466	0.940536
1570	P35637-2;P35637	P35637-2	FUS	FUS	FUS	FUS RNA binding protein	16p11.2	28	27	22	18	24	23	18	18	23	26	24	31	26.4609	25.4137	19.7685	16.2379	23.1474	22.2567	21.6797	22.15	23.0614	27.2571	24.2773	30.8433	1.11992	-1.11992	0.316747	0.634458
5278	Q9NY33;Q9NY33-4;Q9NY33-2	Q9NY33	DPP3	DPP3	DPP3	dipeptidyl peptidase 3	11q13.2	27	26	25	28	30	28	19	21	22	17	20	19	25.5159	24.4724	22.4642	25.259	28.9342	27.0951	22.8841	25.8416	22.0587	17.822	20.2311	18.904	-1.20353	1.20353	0.122488	0.402781
646	O94832	O94832	MYO1D	MYO1D	MYO1D	myosin ID	17q11.2	5	8	16	14	5	4	0	0	1	2	1	0	4.72517	7.52998	14.3771	12.6295	4.82237	3.87073	0	0	1.00267	2.0967	1.01155	0	-11.6652	11.6652	0.000128703	0.0105257
1702	P46060	P46060	RANGAP1	RANGAP1	RANGAP1	Ran GTPase activating protein 1	22q13.2	31	27	22	20	19	21	15	20	25	29	28	24	29.296	25.4137	19.7685	18.0421	18.325	20.3214	18.0664	24.6111	25.0667	30.4022	28.3235	23.8787	1.14624	-1.14624	0.24009	0.566849
2118	P62191;P62191-2	P62191	PSMC1	PSMC1	PSMC1	proteasome 26S subunit, ATPase 1	14q32.11	21	23	26	26	21	26	23	20	24	24	23	24	19.8457	21.6487	23.3628	23.4548	20.254	25.1598	27.7018	24.6111	24.064	25.1604	23.2657	23.8787	1.11184	-1.11184	0.405866	0.705437
4549	Q9BRP4;Q9BRP4-2;Q9BRP4-3	Q9BRP4	PAAF1	PAAF1	PAAF1	proteasomal ATPase associated factor 1	11q13.4	2	1	2	3	3	1	0	0	0	0	0	1	1.89007	0.941247	1.79714	2.70632	2.89342	0.967684	0	0	0	0	0	0.994945	-11.2528	11.2528	0.0024415	0.0489476
4720	Q9BYN0	Q9BYN0	SRXN1	SRXN1	SRXN1	sulfiredoxin 1	20p13	1	2	2	3	1	3	0	0	0	0	1	0	0.945033	1.88249	1.79714	2.70632	0.964474	2.90305	0	0	0	0	1.01155	0	-11.0706	11.0706	0.0024415	0.0489476
3148	Q5TH69	Q5TH69	ARFGEF3	ARFGEF3	ARFGEF3	ARFGEF family member 3	6q23.3-q24.1	1	1	2	5	1	2	0	0	0	0	1	0	0.945033	0.941247	1.79714	4.51053	0.964474	1.93537	0	0	0	0	1.01155	0	-10.9671	10.9671	0.00409123	0.0639903
1852	P50851-2	P50851-2	LRBA	LRBA	LRBA	LPS responsive beige-like anchor protein	4q31.3	19	19	24	23	32	30	26	21	20	24	22	19	17.9556	17.8837	21.5656	20.7484	30.8632	29.0305	31.3151	25.8416	20.0534	25.1604	22.2542	18.904	1.03971	-1.03971	0.801199	0.943754
5384	Q9P2E3;Q9P2E3-2	Q9P2E3	ZNFX1	ZNFX1	ZNFX1	zinc finger NFX1-type containing 1	20q13.13	5	5	7	5	6	6	0	0	1	0	1	1	4.72517	4.70624	6.28998	4.51053	5.78684	5.8061	0	0	1.00267	0	1.01155	0.994945	-10.576	10.576	5.74641e-06	0.00170065
2119	P62195;P62195-2	P62195	PSMC5	PSMC5	PSMC5	proteasome 26S subunit, ATPase 5	17q23.3	24	24	29	23	21	22	18	18	28	22	23	25	22.6808	22.5899	26.0585	20.7484	20.254	21.289	21.6797	22.15	28.0747	23.0637	23.2657	24.8736	1.071	-1.071	0.559677	0.823357
662	O94906;O94906-2	O94906	PRPF6	PRPF6	PRPF6	pre-mRNA processing factor 6	20q13.33	32	35	18	22	27	24	17	20	24	22	18	17	30.2411	32.9437	16.1742	19.8463	26.0408	23.2244	20.4753	24.6111	24.064	23.0637	18.208	16.9141	-1.16597	1.16597	0.225558	0.550764
4505	Q99988	Q99988	GDF15	GDF15	GDF15	growth differentiation factor 15	19p13.11	1	1	6	8	6	5	2	0	0	0	0	0	0.945033	0.941247	5.39141	7.21685	5.78684	4.83842	2.40886	0	0	0	0	0	-10.4281	10.4281	0.00117453	0.0340786
211	O14657	O14657	TOR1B	TOR1B	TOR1B	torsin family 1 member B	9q34.11	2	3	4	6	3	4	0	0	0	0	0	2	1.89007	2.82374	3.59427	5.41264	2.89342	3.87073	0	0	0	0	0	1.98989	-10.2945	10.2945	0.000180269	0.0119889
2382	Q05682-5;Q05682-3	Q05682-5	CALD1	CALD1	CALD1	caldesmon 1	7q33	1	2	3	2	2	1	0	0	1	0	0	0	0.945033	1.88249	2.6957	1.80421	1.92895	0.967684	0	0	1.00267	0	0	0	-10.1969	10.1969	0.00426549	0.0646978
1547	P35232;P35232-2	P35232	PHB	PHB	PHB	prohibitin	17q21.33	26	26	20	22	24	23	26	22	22	23	18	23	24.5709	24.4724	17.9714	19.8463	23.1474	22.2567	31.3151	27.0722	22.0587	24.1121	18.208	22.8837	1.1012	-1.1012	0.485735	0.762415
1874	P51572;P51572-2	P51572	BCAP31	BCAP31	BCAP31	B cell receptor associated protein 31	Xq28	21	22	36	37	17	19	28	28	20	17	14	16	19.8457	20.7074	32.3485	33.3779	16.3961	18.386	33.724	34.4555	20.0534	17.822	14.1617	15.9191	-1.03618	1.03618	0.732646	0.909507
313	O15371-3;O15371;O15371-2	O15371-3	EIF3D	EIF3D	EIF3D	eukaryotic translation initiation factor 3 subunit D	22q12.3	29	27	25	24	21	25	17	14	28	22	30	12	27.406	25.4137	22.4642	21.6505	20.254	24.1921	20.4753	17.2278	28.0747	23.0637	30.3466	11.9393	-1.07819	1.07819	0.576083	0.831317
622	O75947;O75947-2	O75947	ATP5H	ATP5H	ATP5PD	ATP synthase peripheral stalk subunit d	17q25.1	25	24	21	21	26	30	19	19	22	22	19	26	23.6258	22.5899	18.8699	18.9442	25.0763	29.0305	22.8841	23.3805	22.0587	23.0637	19.2195	25.8686	-1.01217	1.01217	0.946819	0.977165
1548	P35237	P35237	SERPINB6	SERPINB6	SERPINB6	serpin family B member 6	6p25.2	27	28	18	22	23	22	19	20	23	23	24	24	25.5159	26.3549	16.1742	19.8463	22.1829	21.289	22.8841	24.6111	23.0614	24.1121	24.2773	23.8787	1.08725	-1.08725	0.486773	0.763086
1785	P49419-2;P49419;P49419-4	P49419-2	ALDH7A1	ALDH7A1	ALDH7A1	aldehyde dehydrogenase 7 family member A1	5q23.2	20	24	26	24	26	24	23	15	25	21	22	23	18.9007	22.5899	23.3628	21.6505	25.0763	23.2244	27.7018	18.4583	25.0667	22.0154	22.2542	22.8837	1.02652	-1.02652	0.826629	0.950157
2596	Q13561;Q13561-3;Q13561-2	Q13561	DCTN2	DCTN2	DCTN2	dynactin subunit 2	12q13.3	26	25	20	18	25	24	14	22	28	20	25	26	24.5709	23.5312	17.9714	16.2379	24.1118	23.2244	16.862	27.0722	28.0747	20.967	25.2888	25.8686	1.11173	-1.11173	0.357142	0.665135
283	O15145	O15145	ARPC3	ARPC3	ARPC3	actin related protein 2/3 complex subunit 3	12q24.11	24	23	20	30	20	28	16	16	23	23	21	28	22.6808	21.6487	17.9714	27.0632	19.2895	27.0951	19.2708	19.6889	23.0614	24.1121	21.2426	27.8585	-1.0038	1.0038	0.968823	0.986678
902	P06493;P06493-2	P06493	CDK1	CDK1	CDK1	cyclin dependent kinase 1	10q21.2	28	25	27	24	26	24	12	11	25	24	19	27	26.4609	23.5312	24.2613	21.6505	25.0763	23.2244	14.4531	13.5361	25.0667	25.1604	19.2195	26.8635	-1.16014	1.16014	0.297765	0.612899
1739	P48047	P48047	ATP5O	ATP5O	ATP5PO	ATP synthase peripheral stalk subunit OSCP	21q22.11	26	26	21	27	22	28	25	21	24	20	15	17	24.5709	24.4724	18.8699	24.3569	21.2184	27.0951	30.1107	25.8416	24.064	20.967	15.1733	16.9141	-1.05646	1.05646	0.581231	0.833005
1877	P51610;P51610-2;P51610-4;P51610-3	P51610	HCFC1	HCFC1	HCFC1	host cell factor C1	Xq28	21	21	28	25	23	24	16	21	19	24	22	28	19.8457	19.7662	25.1599	22.5527	22.1829	23.2244	19.2708	25.8416	19.0507	25.1604	22.2542	27.8585	1.05051	-1.05051	0.695951	0.887875
3092	Q5JTV8	Q5JTV8	TOR1AIP1	TOR1AIP1	TOR1AIP1	torsin 1A interacting protein 1	1q25.2	21	26	30	29	18	20	20	21	25	19	21	22	19.8457	24.4724	26.957	26.1611	17.3605	19.3537	24.0886	25.8416	25.0667	19.9187	21.2426	21.8888	1.02905	-1.02905	0.867168	0.961102
4068	Q93008-1;Q93008	Q93008-1	USP9X	USP9X	USP9X	ubiquitin specific peptidase 9, X-linked	Xp11.4	20	18	44	36	19	20	17	16	21	21	20	20	18.9007	16.9425	39.537	32.4758	18.325	19.3537	20.4753	19.6889	21.056	22.0154	20.2311	19.8989	-1.1797	1.1797	0.367606	0.670529
5792	Q9Y3U8	Q9Y3U8	RPL36	RPL36	RPL36	ribosomal protein L36	19p13.2	26	23	23	27	24	25	16	14	23	21	27	23	24.5709	21.6487	20.6671	24.3569	23.1474	24.1921	19.2708	17.2278	23.0614	22.0154	27.3119	22.8837	-1.0517	1.0517	0.748204	0.917739
20	A5YKK6;A5YKK6-2;A5YKK6-3;A5YKK6-4	A5YKK6	CNOT1	CNOT1	CNOT1	CCR4-NOT transcription complex subunit 1	16q21	29	27	23	25	20	24	15	11	22	20	27	27	27.406	25.4137	20.6671	22.5527	19.2895	23.2244	18.0664	13.5361	22.0587	20.967	27.3119	26.8635	-1.07569	1.07569	0.649564	0.857442
348	O43242;O43242-2	O43242	PSMD3	PSMD3	PSMD3	proteasome 26S subunit, non-ATPase 3	17q21.1	21	25	27	25	25	25	13	18	22	22	22	25	19.8457	23.5312	24.2613	22.5527	24.1118	24.1921	15.6576	22.15	22.0587	23.0637	22.2542	24.8736	-1.06487	1.06487	0.655567	0.862865
2478	Q12888;Q12888-2;Q12888-3	Q12888	TP53BP1	TP53BP1	TP53BP1	tumor protein p53 binding protein 1	15q15.3	25	20	19	22	28	30	26	24	20	21	18	17	23.6258	18.8249	17.0728	19.8463	27.0053	29.0305	31.3151	29.5333	20.0534	22.0154	18.208	16.9141	1.01945	-1.01945	0.971225	0.987067
2771	Q15008;Q15008-4;Q15008-3;Q15008-2	Q15008	PSMD6	PSMD6	PSMD6	proteasome 26S subunit, non-ATPase 6	3p14.1	19	12	29	33	22	20	14	14	25	29	29	24	17.9556	11.295	26.0585	29.7695	21.2184	19.3537	16.862	17.2278	25.0667	30.4022	29.335	23.8787	1.13626	-1.13626	0.346284	0.657362
5528	Q9UJS0;Q9UJS0-2	Q9UJS0	SLC25A13	SLC25A13	SLC25A13	solute carrier family 25 member 13	7q21.3	28	26	26	28	22	20	27	26	17	17	17	16	26.4609	24.4724	23.3628	25.259	21.2184	19.3537	32.5196	31.9944	17.0454	17.822	17.1964	15.9191	-1.05759	1.05759	0.496887	0.771751
2195	P63173	P63173	RPL38	RPL38	RPL38	ribosomal protein L38	17q25.1	23	20	22	30	22	20	19	18	26	22	22	25	21.7358	18.8249	19.7685	27.0632	21.2184	19.3537	22.8841	22.15	26.0694	23.0637	22.2542	24.8736	1.10417	-1.10417	0.423388	0.717649
4151	Q96C19;Q9BUP0-2	Q96C19	EFHD2;EFHD1	EFHD2	EFHD2	EF-hand domain family member D2	1p36.21	24	24	34	28	23	22	13	11	27	20	18	25	22.6808	22.5899	30.5513	25.259	22.1829	21.289	15.6576	13.5361	27.0721	20.967	18.208	24.8736	-1.20146	1.20146	0.177461	0.496169
438	O60287	O60287	URB1	URB1	URB1	URB1 ribosome biogenesis 1 homolog (S. cerevisiae)	21q22.11	2	1	4	2	1	1	0	0	0	0	1	0	1.89007	0.941247	3.59427	1.80421	0.964474	0.967684	0	0	0	0	1.01155	0	-10.0459	10.0459	0.0046358	0.0679335
975	P08708	P08708	RPS17	RPS17	RPS17	ribosomal protein S17	15q25.2	21	23	26	25	30	19	16	15	23	20	21	29	19.8457	21.6487	23.3628	22.5527	28.9342	18.386	19.2708	18.4583	23.0614	20.967	21.2426	28.8534	-1.02182	1.02182	0.921578	0.971735
1257	P20073-2;P20073	P20073-2	ANXA7	ANXA7	ANXA7	annexin A7	10q22.2	22	22	26	31	26	24	17	18	20	23	19	20	20.7907	20.7074	23.3628	27.9653	25.0763	23.2244	20.4753	22.15	20.0534	24.1121	19.2195	19.8989	-1.12086	1.12086	0.355819	0.664232
2073	P61163	P61163	ACTR1A	ACTR1A	ACTR1A	ARP1 actin related protein 1 homolog A	10q24.32	25	23	21	23	24	25	13	11	23	22	27	31	23.6258	21.6487	18.8699	20.7484	23.1474	24.1921	15.6576	13.5361	23.0614	23.0637	27.3119	30.8433	1.00939	-1.00939	0.811934	0.946037
5293	Q9NYL9	Q9NYL9	TMOD3	TMOD3	TMOD3	tropomodulin 3	15q21.2	25	24	20	28	20	19	15	15	23	25	28	26	23.6258	22.5899	17.9714	25.259	19.2895	18.386	18.0664	18.4583	23.0614	26.2088	28.3235	25.8686	1.10121	-1.10121	0.39657	0.695908
226	O14776-2;O14776;Q5VWI1	O14776-2	TCERG1;TCERG1L	TCERG1	TCERG1	transcription elongation regulator 1	5q32	29	26	17	10	23	25	22	21	28	15	24	27	27.406	24.4724	15.2757	9.02106	22.1829	24.1921	26.4974	25.8416	28.0747	15.7253	24.2773	26.8635	1.20179	-1.20179	0.197952	0.527796
1810	P49756;P49756-2;P49756-3;P49756-4	P49756	RBM25	RBM25	RBM25	RNA binding motif protein 25	14q24.2	22	24	26	22	21	25	16	18	22	28	22	21	20.7907	22.5899	23.3628	19.8463	20.254	24.1921	19.2708	22.15	22.0587	29.3538	22.2542	20.8939	1.03774	-1.03774	0.754065	0.92048
1985	P55209-2;P55209;P55209-3	P55209-2	NAP1L1	NAP1L1	NAP1L1	nucleosome assembly protein 1 like 1	12q21.1	22	25	19	20	21	20	13	13	30	27	28	29	20.7907	23.5312	17.0728	18.0421	20.254	19.3537	15.6576	15.9972	30.0801	28.3055	28.3235	28.8534	1.23666	-1.23666	0.0670008	0.308961
2775	Q15020;Q15020-4;Q15020-2;Q15020-3	Q15020	SART3	SART3	SART3	squamous cell carcinoma antigen recognized by T cells 3	12q23.3	13	30	21	19	33	35	15	17	21	24	17	22	12.2854	28.2374	18.8699	17.14	31.8276	33.8689	18.0664	20.9194	21.056	25.1604	17.1964	21.8888	-1.14436	1.14436	0.508979	0.783116
2927	Q16576;Q16576-2	Q16576	RBBP7	RBBP7	RBBP7	RB binding protein 7, chromatin remodeling factor	Xp22.2	20	19	28	23	21	22	16	18	27	25	25	23	18.9007	17.8837	25.1599	20.7484	20.254	21.289	19.2708	22.15	27.0721	26.2088	25.2888	22.8837	1.15003	-1.15003	0.251563	0.574633
4499	Q99873-4;Q99873-3;Q99873-2;Q99873;Q9NR22-2;Q9NR22	Q99873-4	PRMT1;PRMT8	PRMT1	PRMT1	protein arginine methyltransferase 1	19q13.33	27	25	21	23	18	21	15	14	24	25	25	29	25.5159	23.5312	18.8699	20.7484	17.3605	20.3214	18.0664	17.2278	24.064	26.2088	25.2888	28.8534	1.10576	-1.10576	0.3672	0.670529
4879	Q9H3U1-2	Q9H3U1-2	UNC45A	UNC45A	UNC45A	unc-45 myosin chaperone A	15q26.1	20	22	20	19	31	31	12	16	26	26	23	21	18.9007	20.7074	17.9714	17.14	29.8987	29.9982	14.4531	19.6889	26.0694	27.2571	23.2657	20.8939	-1.0227	1.0227	0.968277	0.986678
123	O00231;O00231-2	O00231	PSMD11	PSMD11	PSMD11	proteasome 26S subunit, non-ATPase 11	17q11.2	23	24	35	24	17	21	17	19	23	19	19	25	21.7358	22.5899	31.4499	21.6505	16.3961	20.3214	20.4753	23.3805	23.0614	19.9187	19.2195	24.8736	-1.02455	1.02455	0.832675	0.950157
3344	Q709F0;Q709F0-3;Q709F0-2	Q709F0	ACAD11	ACAD11	ACAD11	acyl-CoA dehydrogenase family member 11	3q22.1	0	0	4	4	3	2	1	0	0	0	0	0	0	0	3.59427	3.60842	2.89342	1.93537	1.20443	0	0	0	0	0	-9.98938	9.98938	0.0163351	0.144516
1667	P42677	P42677	RPS27	RPS27	RPS27	ribosomal protein S27	1q21.3	21	20	23	26	24	21	19	16	23	19	25	29	19.8457	18.8249	20.6671	23.4548	23.1474	20.3214	22.8841	19.6889	23.0614	19.9187	25.2888	28.8534	1.1064	-1.1064	0.398853	0.698371
2409	Q07812-8;Q07812;Q07812-2;Q07812-5;Q07812-7;Q07812-6;Q07812-4;Q07812-3	Q07812-8	BAX	BAX	BAX	BCL2 associated X, apoptosis regulator	19q13.33	23	24	27	32	23	21	16	16	28	20	18	18	21.7358	22.5899	24.2613	28.8674	22.1829	20.3214	19.2708	19.6889	28.0747	20.967	18.208	17.909	-1.12762	1.12762	0.346726	0.657568
1007	P09668	P09668	CTSH	CTSH	CTSH	cathepsin H	15q25.1	4	3	1	1	2	2	0	1	0	0	0	0	3.78013	2.82374	0.898568	0.902106	1.92895	1.93537	0	1.23055	0	0	0	0	-9.9702	9.9702	0.00173439	0.0411299
3784	Q8NE71-2;Q8NE71	Q8NE71-2	ABCF1	ABCF1	ABCF1	ATP binding cassette subfamily F member 1	6p21.33	30	19	15	18	30	32	17	19	19	24	24	19	28.351	17.8837	13.4785	16.2379	28.9342	30.9659	20.4753	23.3805	19.0507	25.1604	24.2773	18.904	-1.03507	1.03507	0.898137	0.967742
3989	Q92538-3;Q92538-2;Q92538	Q92538-3	GBF1	GBF1	GBF1	golgi brefeldin A resistant guanine nucleotide exchange factor 1	10q24.32	31	22	28	29	18	19	21	19	19	18	21	21	29.296	20.7074	25.1599	26.1611	17.3605	18.386	25.293	23.3805	19.0507	18.8703	21.2426	20.8939	-1.06479	1.06479	0.569951	0.828269
4291	Q96IZ0	Q96IZ0	PAWR	PAWR	PAWR	pro-apoptotic WT1 regulator	12q21.2	28	31	21	22	16	16	8	11	29	26	26	32	26.4609	29.1787	18.8699	19.8463	15.4316	15.4829	9.63542	13.5361	29.0774	27.2571	26.3004	31.8383	1.09878	-1.09878	0.634359	0.850091
4690	Q9BXP5-4;Q9BXP5-2;Q9BXP5-3;Q9BXP5;Q9BXP5-5	Q9BXP5-4	SRRT	SRRT	SRRT	serrate, RNA effector molecule	7q22.1	20	23	24	21	24	25	20	19	21	23	23	23	18.9007	21.6487	21.5656	18.9442	23.1474	24.1921	24.0886	23.3805	21.056	24.1121	23.2657	22.8837	1.0809	-1.0809	0.539713	0.810391
1491	P31040;P31040-2;P31040-3	P31040	SDHA	SDHA	SDHA	succinate dehydrogenase complex flavoprotein subunit A	5p15.33	29	26	24	25	26	20	28	24	18	16	16	13	27.406	24.4724	21.5656	22.5527	25.0763	19.3537	33.724	29.5333	18.048	16.7736	16.1849	12.9343	-1.104	1.104	0.346648	0.657568
2435	Q08AM6;Q08AM6-2	Q08AM6	VAC14	VAC14	VAC14	Vac14, PIKFYVE complex component	16q22.1-q22.2	19	18	26	31	27	22	1	1	2	2	5	2	17.9556	16.9425	23.3628	27.9653	26.0408	21.289	1.20443	1.23055	2.00534	2.0967	5.05777	1.98989	-9.83137	9.83137	2.15997e-08	6.39242e-05
1958	P54278;P54278-3;Q13401;Q13401-2;P54278-4;Q13670;A4D2B8-3;A4D2B8-2;A4D2B8;P54278-2	P54278	PMS2;PMS2P3;PMS2P11;PMS2P1	PMS2	PMS2	PMS1 homolog 2, mismatch repair system component	7p22.1	2	3	3	5	0	0	0	1	0	0	0	0	1.89007	2.82374	2.6957	4.51053	0	0	0	1.23055	0	0	0	0	-9.68673	9.68673	0.0184514	0.154257
4235	Q96FZ2	Q96FZ2	HMCES	HMCES	HMCES	5-hydroxymethylcytosine binding, ES cell specific	3q21.3	2	2	2	1	1	2	0	0	0	0	1	0	1.89007	1.88249	1.79714	0.902106	0.964474	1.93537	0	0	0	0	1.01155	0	-9.26461	9.26461	0.00739013	0.089088
1367	P25788-2;P25788	P25788-2	PSMA3	PSMA3	PSMA3	proteasome subunit alpha 3	14q23.1	24	22	21	19	23	20	22	23	22	20	27	20	22.6808	20.7074	18.8699	17.14	22.1829	19.3537	26.4974	28.3027	22.0587	20.967	27.3119	19.8989	1.1993	-1.1993	0.167475	0.479344
2174	P62910	P62910	RPL32	RPL32	RPL32	ribosomal protein L32	3p25.2	20	17	31	25	22	24	19	12	20	20	24	29	18.9007	16.0012	27.8556	22.5527	21.2184	23.2244	22.8841	14.7666	20.0534	20.967	24.2773	28.8534	1.01579	-1.01579	0.85709	0.959573
157	O00468-6;O00468-3;O00468-7;O00468-5;O00468-4;O00468;O00468-2	O00468-6	AGRN	AGRN	AGRN	agrin	1p36.33	17	17	19	17	33	33	22	20	19	16	24	25	16.0656	16.0012	17.0728	15.3358	31.8276	31.9336	26.4974	24.6111	19.0507	16.7736	24.2773	24.8736	1.06119	-1.06119	0.619088	0.841999
5668	Q9UQ35;Q9UQ35-2;Q9UQ35-3	Q9UQ35	SRRM2	SRRM2	SRRM2	serine/arginine repetitive matrix 2	16p13.3	23	27	21	20	17	23	15	15	23	23	31	24	21.7358	25.4137	18.8699	18.0421	16.3961	22.2567	18.0664	18.4583	23.0614	24.1121	31.3582	23.8787	1.13218	-1.13218	0.284676	0.600816
1381	P26583	P26583	HMGB2	HMGB2	HMGB2	high mobility group box 2	4q34.1	20	21	24	21	25	19	13	15	25	24	28	26	18.9007	19.7662	21.5656	18.9442	24.1118	18.386	15.6576	18.4583	25.0667	25.1604	28.3235	25.8686	1.13857	-1.13857	0.260842	0.574633
3668	Q8N3P4-2;Q8N3P4-3;Q8N3P4	Q8N3P4-2	VPS8	VPS8	VPS8	VPS8, CORVET complex subunit	3q27.2	2	0	3	1	2	2	0	0	0	0	1	0	1.89007	0	2.6957	0.902106	1.92895	1.93537	0	0	0	0	1.01155	0	-9.24538	9.24538	0.00787084	0.0926408
2164	P62857	P62857	RPS28	RPS28	RPS28	ribosomal protein S28	19p13.2	22	21	24	29	20	22	19	18	21	21	19	25	20.7907	19.7662	21.5656	26.1611	19.2895	21.289	22.8841	22.15	21.056	22.0154	19.2195	24.8736	1.02589	-1.02589	0.857987	0.959749
5434	Q9UBT2;Q9UBT2-2	Q9UBT2	UBA2	UBA2	UBA2	ubiquitin like modifier activating enzyme 2	19q13.11	23	26	24	33	24	24	18	17	20	19	15	18	21.7358	24.4724	21.5656	29.7695	23.1474	23.2244	21.6797	20.9194	20.0534	19.9187	15.1733	17.909	-1.24436	1.24436	0.0800526	0.32492
1919	P52789;P52790	P52789	HK2;HK3	HK2	HK2	hexokinase 2	2p12	15	23	20	31	28	27	14	13	22	20	21	25	14.1755	21.6487	17.9714	27.9653	27.0053	26.1275	16.862	15.9972	22.0587	20.967	21.2426	24.8736	-1.10567	1.10567	0.500566	0.774601
5866	Q9Y5S2;Q09013-12;Q09013-10;Q09013-2;Q09013-8;Q09013-5;Q09013-7;Q09013-11;Q09013-15;Q09013;Q09013-16;Q09013-6;Q09013-1;Q6DT37	Q9Y5S2	CDC42BPB;DMPK;CDC42BPG	CDC42BPB	CDC42BPB	CDC42 binding protein kinase beta	14q32.32	33	22	20	14	24	21	21	32	19	18	17	18	31.1861	20.7074	17.9714	12.6295	23.1474	20.3214	25.293	39.3777	19.0507	18.8703	17.1964	17.909	1.09315	-1.09315	0.670831	0.873022
653	O94875-9;O94875;O94875-11;O94875-3;O94875-8;O94875-2;O94875-4;O94875-12;O94875-10;O94875-7;O94875-5;O94875-6	O94875-9	SORBS2	SORBS2	SORBS2	sorbin and SH3 domain containing 2	4q35.1	2	2	8	12	0	0	2	0	0	0	0	0	1.89007	1.88249	7.18855	10.8253	0	0	2.40886	0	0	0	0	0	-9.04429	9.04429	0.0490244	0.270434
1435	P29317;P29317-2	P29317	EPHA2	EPHA2	EPHA2	EPH receptor A2	1p36.13	26	25	29	28	20	18	13	14	21	25	20	19	24.5709	23.5312	26.0585	25.259	19.2895	17.4183	15.6576	17.2278	21.056	26.2088	20.2311	18.904	-1.14119	1.14119	0.323294	0.639074
1718	P46779;P46779-2;P46779-3;P46779-4;P46779-5	P46779	RPL28	RPL28	RPL28	ribosomal protein L28	19q13.4	17	20	27	23	25	21	16	16	24	20	23	26	16.0656	18.8249	24.2613	20.7484	24.1118	20.3214	19.2708	19.6889	24.064	20.967	23.2657	25.8686	1.07071	-1.07071	0.557382	0.822114
1980	P55145	P55145	MANF	MANF	MANF	mesencephalic astrocyte derived neurotrophic factor	3p21.2	19	22	24	26	22	24	15	10	26	22	25	23	17.9556	20.7074	21.5656	23.4548	21.2184	23.2244	18.0664	12.3055	26.0694	23.0637	25.2888	22.8837	-1.00351	1.00351	0.928515	0.973239
2179	P62942	P62942	FKBP1A	FKBP1A	FKBP1A	FK506 binding protein 1A	20p13	25	21	23	28	27	24	16	19	18	17	20	20	23.6258	19.7662	20.6671	25.259	26.0408	23.2244	19.2708	23.3805	18.048	17.822	20.2311	19.8989	-1.16799	1.16799	0.219809	0.545058
2967	Q27J81-2;Q27J81;Q27J81-3	Q27J81-2	INF2	INF2	INF2	inverted formin, FH2 and WH2 domain containing	14q32.33	29	25	30	24	19	18	20	16	19	14	23	21	27.406	23.5312	26.957	21.6505	18.325	17.4183	24.0886	19.6889	19.0507	14.6769	23.2657	20.8939	-1.11198	1.11198	0.389977	0.688215
4953	Q9H910;Q9H910-3	Q9H910	HN1L	HN1L	JPT2	Jupiter microtubule associated homolog 2	16p13.3	25	22	23	25	18	19	16	14	26	24	20	25	23.6258	20.7074	20.6671	22.5527	17.3605	18.386	19.2708	17.2278	26.0694	25.1604	20.2311	24.8736	1.07732	-1.07732	0.522613	0.796023
5304	Q9NZ08;Q9NZ08-2	Q9NZ08	ERAP1	ERAP1	ERAP1	endoplasmic reticulum aminopeptidase 1	5q15	22	27	16	14	24	29	14	15	23	21	28	24	20.7907	25.4137	14.3771	12.6295	23.1474	28.0628	16.862	18.4583	23.0614	22.0154	28.3235	23.8787	1.06573	-1.06573	0.531259	0.803199
4	A0MZ66;A0MZ66-3;A0MZ66-5;A0MZ66-6;A0MZ66-4;A0MZ66-8;A0MZ66-2;A0MZ66-7	A0MZ66	SHTN1	SHTN1	SHTN1	shootin 1	10q25.3	26	22	28	26	21	21	13	13	23	16	21	25	24.5709	20.7074	25.1599	23.4548	20.254	20.3214	15.6576	15.9972	23.0614	16.7736	21.2426	24.8736	-1.14338	1.14338	0.340896	0.654494
3242	Q6NXE6-2;Q6NXE6	Q6NXE6-2	ARMC6	ARMC6	ARMC6	armadillo repeat containing 6	19p13.11	0	0	3	5	2	2	0	1	0	0	0	0	0	0	2.6957	4.51053	1.92895	1.93537	0	1.23055	0	0	0	0	-8.9964	8.9964	0.0232795	0.174384
1229	P18621;P18621-3;P18621-2	P18621	RPL17	RPL17	RPL17	ribosomal protein L17	18q21.1	18	20	26	22	23	25	12	9	27	21	21	31	17.0106	18.8249	23.3628	19.8463	22.1829	24.1921	14.4531	11.075	27.0721	22.0154	21.2426	30.8433	1.01022	-1.01022	0.806514	0.944703
3286	Q6PKG0;Q6PKG0-3;Q659C4-7;Q659C4-6;Q659C4-5;Q659C4-2;Q659C4;Q659C4-9	Q6PKG0	LARP1;LARP1B	LARP1	LARP1	La ribonucleoprotein domain family member 1	5q33.2	29	26	23	13	28	29	18	16	15	8	27	23	27.406	24.4724	20.6671	11.7274	27.0053	28.0628	21.6797	19.6889	15.04	8.38681	27.3119	22.8837	-1.21175	1.21175	0.269914	0.582437
3042	Q53GL7	Q53GL7	PARP10	PARP10	PARP10	poly(ADP-ribose) polymerase family member 10	8q24.3	2	2	3	3	9	4	1	1	0	0	0	0	1.89007	1.88249	2.6957	2.70632	8.68027	3.87073	1.20443	1.23055	0	0	0	0	-8.92228	8.92228	0.00103067	0.0316091
200	O14579;O14579-3;O14579-2	O14579	COPE	COPE	COPE	coatomer protein complex subunit epsilon	19p13.11	21	23	29	26	23	19	17	15	21	21	21	18	19.8457	21.6487	26.0585	23.4548	22.1829	18.386	20.4753	18.4583	21.056	22.0154	21.2426	17.909	-1.086	1.086	0.521617	0.794719
4448	Q99519	Q99519	NEU1	NEU1	NEU1	neuraminidase 1	6p21.33	2	3	2	3	5	4	0	0	1	0	1	0	1.89007	2.82374	1.79714	2.70632	4.82237	3.87073	0	0	1.00267	0	1.01155	0	-8.89195	8.89195	0.000415483	0.0187729
4267	Q96HE7;Q86YB8	Q96HE7	ERO1A;ERO1B	ERO1A	ERO1A	endoplasmic reticulum oxidoreductase 1 alpha	14q22.1	15	23	26	23	21	20	18	15	24	24	23	22	14.1755	21.6487	23.3628	20.7484	20.254	19.3537	21.6797	18.4583	24.064	25.1604	23.2657	21.8888	1.12526	-1.12526	0.346056	0.65724
2544	Q13277-2;Q13277-3;Q13277	Q13277-2	STX3	STX3	STX3	syntaxin 3	11q12.1	0	1	1	3	2	4	0	1	0	0	0	0	0	0.941247	0.898568	2.70632	1.92895	3.87073	0	1.23055	0	0	0	0	-8.40745	8.40745	0.00943355	0.10444
1072	P11766	P11766	ADH5	ADH5	ADH5	alcohol dehydrogenase 5 (class III), chi polypeptide	4q23	21	20	23	22	23	23	18	18	22	19	24	20	19.8457	18.8249	20.6671	19.8463	22.1829	22.2567	21.6797	22.15	22.0587	19.9187	24.2773	19.8989	1.05144	-1.05144	0.697254	0.888407
1298	P22087	P22087	FBL	FBL	FBL	fibrillarin	19q13.2	24	25	24	25	22	21	15	13	20	18	22	24	22.6808	23.5312	21.5656	22.5527	21.2184	20.3214	18.0664	15.9972	20.0534	18.8703	22.2542	23.8787	-1.10703	1.10703	0.4734	0.758953
2525	Q13151	Q13151	HNRNPA0	HNRNPA0	HNRNPA0	heterogeneous nuclear ribonucleoprotein A0	5q31.2	24	26	14	16	23	22	15	17	24	22	24	26	22.6808	24.4724	12.58	14.4337	22.1829	21.289	18.0664	20.9194	24.064	23.0637	24.2773	25.8686	1.15829	-1.15829	0.212588	0.540955
3997	Q92562	Q92562	FIG4	FIG4	FIG4	FIG4 phosphoinositide 5-phosphatase	6q21	2	2	1	2	1	1	0	0	1	0	0	0	1.89007	1.88249	0.898568	1.80421	0.964474	0.967684	0	0	1.00267	0	0	0	-8.38512	8.38512	0.0130607	0.126207
892	P05455	P05455	SSB	SSB	SSB	Sjogren syndrome antigen B	2q31.1	17	18	23	18	23	22	18	21	25	19	23	25	16.0656	16.9425	20.6671	16.2379	22.1829	21.289	21.6797	25.8416	25.0667	19.9187	23.2657	24.8736	1.24043	-1.24043	0.094864	0.355605
901	P06454-2;P06454	P06454-2	PTMA	PTMA	PTMA	prothymosin alpha	2q37.1	21	19	16	15	25	25	13	14	29	24	28	23	19.8457	17.8837	14.3771	13.5316	24.1118	24.1921	15.6576	17.2278	29.0774	25.1604	28.3235	22.8837	1.21404	-1.21404	0.111154	0.384421
5616	Q9UMS4	Q9UMS4	PRPF19	PRPF19	PRPF19	pre-mRNA processing factor 19	11q12.2	17	23	26	28	18	17	16	16	23	23	22	23	16.0656	21.6487	23.3628	25.259	17.3605	16.4506	19.2708	19.6889	23.0614	24.1121	22.2542	22.8837	1.09259	-1.09259	0.485367	0.762236
354	O43290	O43290	SART1	SART1	SART1	SART1, U4/U6.U5 tri-snRNP-associated protein 1	11q13.1	23	27	20	21	21	18	19	20	20	25	19	18	21.7358	25.4137	17.9714	18.9442	20.254	17.4183	22.8841	24.6111	20.0534	26.2088	19.2195	17.909	1.07515	-1.07515	0.611559	0.839281
1314	P23193;P23193-2	P23193	TCEA1	TCEA1	TCEA1	transcription elongation factor A1	8q11.23	26	25	13	17	22	21	18	14	22	21	28	24	24.5709	23.5312	11.6814	15.3358	21.2184	20.3214	21.6797	17.2278	22.0587	22.0154	28.3235	23.8787	1.15879	-1.15879	0.214267	0.540955
2270	P98155-2;P98155	P98155-2	VLDLR	VLDLR	VLDLR	very low density lipoprotein receptor	9p24.2	3	2	10	11	7	5	1	0	0	1	1	1	2.8351	1.88249	8.98568	9.92317	6.75132	4.83842	1.20443	0	0	1.04835	1.01155	0.994945	-8.26811	8.26811	0.000316875	0.0161688
1312	P22695	P22695	UQCRC2	UQCRC2	UQCRC2	ubiquinol-cytochrome c reductase core protein 2	16p12.2	22	22	21	19	25	19	21	20	19	21	19	22	20.7907	20.7074	18.8699	17.14	24.1118	18.386	25.293	24.6111	19.0507	22.0154	19.2195	21.8888	1.1006	-1.1006	0.490788	0.765878
1493	P31153;P31153-2;Q00266	P31153	MAT2A;MAT1A	MAT2A	MAT2A	methionine adenosyltransferase 2A	2p11.2	22	18	32	22	20	20	20	19	18	20	17	22	20.7907	16.9425	28.7542	19.8463	19.2895	19.3537	24.0886	23.3805	18.048	20.967	17.1964	21.8888	1.00474	-1.00474	0.967568	0.986678
5353	Q9P0L0	Q9P0L0	VAPA	VAPA	VAPA	VAMP associated protein A	18p11.22	19	20	29	26	25	25	17	17	17	18	18	19	17.9556	18.8249	26.0585	23.4548	24.1118	24.1921	20.4753	20.9194	17.0454	18.8703	18.208	18.904	-1.17632	1.17632	0.201749	0.53097
295	O15230;O15230-2	O15230	LAMA5	LAMA5	LAMA5	laminin subunit alpha 5	20q13.33	26	18	10	10	25	27	32	27	21	17	20	16	24.5709	16.9425	8.98568	9.02106	24.1118	26.1275	38.5417	33.225	21.056	17.822	20.2311	15.9191	1.33742	-1.33742	0.176763	0.495156
1492	P31150	P31150	GDI1	GDI1	GDI1	GDP dissociation inhibitor 1	Xq28	16	19	32	24	23	22	24	21	16	16	20	16	15.1205	17.8837	28.7542	21.6505	22.1829	21.289	28.9063	25.8416	16.0427	16.7736	20.2311	15.9191	-1.0256	1.0256	0.722307	0.903303
1632	P40925;P40925-3;P40925-2	P40925	MDH1	MDH1	MDH1	malate dehydrogenase 1	2p15	17	23	20	20	23	24	18	20	20	19	23	22	16.0656	21.6487	17.9714	18.0421	22.1829	23.2244	21.6797	24.6111	20.0534	19.9187	23.2657	21.8888	1.1031	-1.1031	0.454686	0.745923
1672	P42765	P42765	ACAA2	ACAA2	ACAA2	acetyl-CoA acyltransferase 2	18q21.1	16	18	28	28	17	19	30	28	15	14	15	21	15.1205	16.9425	25.1599	25.259	16.3961	18.386	36.1328	34.4555	15.04	14.6769	15.1733	20.8939	1.16295	-1.16295	0.567599	0.826289
1704	P46087;P46087-4;P46087-2;P46087-3	P46087	NOP2	NOP2	NOP2	NOP2 nucleolar protein	12p13.31	21	20	21	23	26	22	16	15	22	22	20	21	19.8457	18.8249	18.8699	20.7484	25.0763	21.289	19.2708	18.4583	22.0587	23.0637	20.2311	20.8939	-1.00547	1.00547	0.995809	0.997494
2943	Q16739	Q16739	UGCG	UGCG	UGCG	UDP-glucose ceramide glucosyltransferase	9q31.3	1	2	2	2	1	1	0	0	0	0	1	0	0.945033	1.88249	1.79714	1.80421	0.964474	0.967684	0	0	0	0	1.01155	0	-8.26554	8.26554	0.0130607	0.126207
812	P00491	P00491	PNP	PNP	PNP	purine nucleoside phosphorylase	14q11.2	21	21	23	23	19	15	20	25	21	17	20	23	19.8457	19.7662	20.6671	20.7484	18.325	14.5153	24.0886	30.7639	21.056	17.822	20.2311	22.8837	1.20179	-1.20179	0.194153	0.52331
3108	Q5SNT2-2;Q5SNT2	Q5SNT2-2	TMEM201	TMEM201	TMEM201	transmembrane protein 201	1p36.22	2	2	0	2	1	2	0	0	0	1	0	0	1.89007	1.88249	0	1.80421	0.964474	1.93537	0	0	0	1.04835	0	0	-8.08566	8.08566	0.0135121	0.129118
1815	P49789	P49789	FHIT	FHIT	FHIT	fragile histidine triad	3p14.2	0	0	3	2	3	2	1	0	0	0	0	0	0	0	2.6957	1.80421	2.89342	1.93537	1.20443	0	0	0	0	0	-7.74534	7.74534	0.0164331	0.144516
1809	P49755	P49755	TMED10	TMED10	TMED10	transmembrane p24 trafficking protein 10	14q24.3	26	22	23	23	18	19	18	16	24	20	20	19	24.5709	20.7074	20.6671	20.7484	17.3605	18.386	21.6797	19.6889	24.064	20.967	20.2311	18.904	1.02527	-1.02527	0.850081	0.955672
1051	P11166	P11166	SLC2A1	SLC2A1	SLC2A1	solute carrier family 2 member 1	1p34.2	22	23	26	22	22	19	14	14	22	18	22	23	20.7907	21.6487	23.3628	19.8463	21.2184	18.386	16.862	17.2278	22.0587	18.8703	22.2542	22.8837	-1.04241	1.04241	0.799245	0.943754
3364	Q7L014	Q7L014	DDX46	DDX46	DDX46	DEAD-box helicase 46	5q31.1	18	21	19	10	21	28	15	26	20	27	21	21	17.0106	19.7662	17.0728	9.02106	20.254	27.0951	18.0664	31.9944	20.0534	28.3055	21.2426	20.8939	1.27524	-1.27524	0.104752	0.379739
5041	Q9HDC9;Q9HDC9-2	Q9HDC9	APMAP	APMAP	APMAP	adipocyte plasma membrane associated protein	20p11.21	26	23	24	23	23	25	14	14	20	19	18	18	24.5709	21.6487	21.5656	20.7484	22.1829	24.1921	16.862	17.2278	20.0534	19.9187	18.208	17.909	-1.22445	1.22445	0.13566	0.422256
1505	P31942-2;P31942;P31942-3;P31942-4;P31942-6;P31942-5	P31942-2	HNRNPH3	HNRNPH3	HNRNPH3	heterogeneous nuclear ribonucleoprotein H3	10q21.3	23	26	19	20	18	21	13	12	24	21	26	23	21.7358	24.4724	17.0728	18.0421	17.3605	20.3214	15.6576	14.7666	24.064	22.0154	26.3004	22.8837	1.05616	-1.05616	0.58961	0.837309
2216	P68400;Q8NEV1;P68400-2	P68400	CSNK2A1;CSNK2A3	CSNK2A1	CSNK2A1	casein kinase 2 alpha 1	20p13	29	22	28	26	20	20	9	14	16	17	19	26	27.406	20.7074	25.1599	23.4548	19.2895	19.3537	10.8399	17.2278	16.0427	17.822	19.2195	25.8686	-1.26491	1.26491	0.0899972	0.345739
2303	Q01105;Q01105-3;Q01105-4;P0DME0	Q01105	SET;SETSIP	SET	SET	SET nuclear proto-oncogene	9q34.11	26	24	22	21	22	22	16	14	14	20	22	23	24.5709	22.5899	19.7685	18.9442	21.2184	21.289	19.2708	17.2278	14.0374	20.967	22.2542	22.8837	-1.10065	1.10065	0.487581	0.763086
2465	Q12797-10;Q12797;Q12797-7;Q12797-4;Q12797-3;Q12797-9;Q12797-6;Q12797-5;Q12797-8;Q12797-2	Q12797-10	ASPH	ASPH	ASPH	aspartate beta-hydroxylase	8q12.3	22	20	22	21	28	28	16	17	19	20	16	17	20.7907	18.8249	19.7685	18.9442	27.0053	27.0951	19.2708	20.9194	19.0507	20.967	16.1849	16.9141	-1.16876	1.16876	0.237526	0.563494
1372	P26045;P26045-2;P26045-3	P26045	PTPN3	PTPN3	PTPN3	protein tyrosine phosphatase, non-receptor type 3	9q31	1	1	6	6	4	2	1	1	0	0	0	0	0.945033	0.941247	5.39141	5.41264	3.8579	1.93537	1.20443	1.23055	0	0	0	0	-7.59085	7.59085	0.00270376	0.0504759
2294	Q00688	Q00688	FKBP3	FKBP3	FKBP3	FK506 binding protein 3	14q21.2	17	21	19	20	23	19	21	16	22	22	24	21	16.0656	19.7662	17.0728	18.0421	22.1829	18.386	25.293	19.6889	22.0587	23.0637	24.2773	20.8939	1.21306	-1.21306	0.139606	0.430545
3111	Q5SSJ5;Q5SSJ5-2;Q5SSJ5-3;Q5SSJ5-5	Q5SSJ5	HP1BP3	HP1BP3	HP1BP3	heterochromatin protein 1 binding protein 3	1p36.12	23	28	21	22	21	16	19	16	14	22	20	23	21.7358	26.3549	18.8699	19.8463	20.254	15.4829	22.8841	19.6889	14.0374	23.0637	20.2311	22.8837	1.002	-1.002	0.993107	0.99638
3649	Q8N1G4	Q8N1G4	LRRC47	LRRC47	LRRC47	leucine rich repeat containing 47	1p36.32	25	23	22	23	26	26	20	15	17	18	19	11	23.6258	21.6487	19.7685	20.7484	25.0763	25.1598	24.0886	18.4583	17.0454	18.8703	19.2195	10.9444	-1.25225	1.25225	0.0785422	0.32492
2113	P62081	P62081	RPS7	RPS7	RPS7	ribosomal protein S7	2p25.3	18	20	38	32	21	16	12	14	20	15	18	20	17.0106	18.8249	34.1456	28.8674	20.254	15.4829	14.4531	17.2278	20.0534	15.7253	18.208	19.8989	-1.27489	1.27489	0.130089	0.41331
2564	Q13423	Q13423	NNT	NNT	NNT	nicotinamide nucleotide transhydrogenase	5p12	26	27	17	19	26	31	17	16	15	17	16	17	24.5709	25.4137	15.2757	17.14	25.0763	29.9982	20.4753	19.6889	15.04	17.822	16.1849	16.9141	-1.2954	1.2954	0.0530914	0.275898
1400	P27695	P27695	APEX1	APEX1	APEX1	apurinic/apyrimidinic endodeoxyribonuclease 1	14q11.2	25	25	22	22	20	21	15	10	19	17	23	24	23.6258	23.5312	19.7685	19.8463	19.2895	20.3214	18.0664	12.3055	19.0507	17.822	23.2657	23.8787	-1.10485	1.10485	0.51286	0.787042
1571	P35658-2;P35658-4;P35658;P35658-3;P35658-5	P35658-2	NUP214	NUP214	NUP214	nucleoporin 214	9q34.13	19	23	29	25	18	21	21	14	22	17	21	13	17.9556	21.6487	26.0585	22.5527	17.3605	20.3214	25.293	17.2278	22.0587	17.822	21.2426	12.9343	-1.07994	1.07994	0.520312	0.793744
2560	Q13404;Q13404-7;Q13404-2;Q13404-1;Q13404-6;Q13404-8	Q13404	UBE2V1	UBE2V1	UBE2V1	ubiquitin conjugating enzyme E2 V1	20q13.13	24	24	18	21	25	27	17	19	20	17	15	16	22.6808	22.5899	16.1742	18.9442	24.1118	26.1275	20.4753	23.3805	20.0534	17.822	15.1733	15.9191	-1.15781	1.15781	0.254235	0.574633
3684	Q8N4X5;Q8N4X5-3	Q8N4X5	AFAP1L2	AFAP1L2	AFAP1L2	actin filament associated protein 1 like 2	10q25.3	21	25	16	18	15	15	10	13	25	30	27	28	19.8457	23.5312	14.3771	16.2379	14.4671	14.5153	12.0443	15.9972	25.0667	31.4505	27.3119	27.8585	1.35693	-1.35693	0.0503784	0.273353
755	O95674	O95674	CDS2	CDS2	CDS2	CDP-diacylglycerol synthase 2	20p12.3	3	2	1	0	2	0	0	0	0	0	0	1	2.8351	1.88249	0.898568	0	1.92895	0	0	0	0	0	0	0.994945	-7.58344	7.58344	0.031684	0.206767
2447	Q0ZGT2-4;Q0ZGT2;Q0ZGT2-3	Q0ZGT2-4	NEXN	NEXN	NEXN	nexilin F-actin binding protein	1p31.1	25	24	22	24	20	18	2	3	30	26	23	25	23.6258	22.5899	19.7685	21.6505	19.2895	17.4183	2.40886	3.69166	30.0801	27.2571	23.2657	24.8736	-1.11441	1.11441	0.305666	0.623016
4233	Q96FW1;Q96FW1-2	Q96FW1	OTUB1	OTUB1	OTUB1	OTU deubiquitinase, ubiquitin aldehyde binding 1	11q13.1	19	20	22	23	19	24	20	21	21	20	17	16	17.9556	18.8249	19.7685	20.7484	18.325	23.2244	24.0886	25.8416	21.056	20.967	17.1964	15.9191	1.05235	-1.05235	0.77187	0.929297
5736	Q9Y2Z0;Q9Y2Z0-2	Q9Y2Z0	SUGT1	SUGT1	SUGT1	SGT1 homolog, MIS12 kinetochore complex assembly cochaperone	13q14.3	19	24	18	17	16	22	17	17	22	25	20	25	17.9556	22.5899	16.1742	15.3358	15.4316	21.289	20.4753	20.9194	22.0587	26.2088	20.2311	24.8736	1.23894	-1.23894	0.0968287	0.359284
1213	P17931	P17931	LGALS3	LGALS3	LGALS3	galectin 3	14q22.3	19	19	22	19	25	26	26	26	17	15	11	16	17.9556	17.8837	19.7685	17.14	24.1118	25.1598	31.3151	31.9944	17.0454	15.7253	11.1271	15.9191	1.00907	-1.00907	0.844698	0.954518
2162	P62851	P62851	RPS25	RPS25	RPS25	ribosomal protein S25	11q23.3	21	23	19	19	23	22	15	13	24	16	25	21	19.8457	21.6487	17.0728	17.14	22.1829	21.289	18.0664	15.9972	24.064	16.7736	25.2888	20.8939	1.01598	-1.01598	0.831494	0.950157
5529	Q9UJU6;Q9UJU6-5	Q9UJU6	DBNL	DBNL	DBNL	drebrin like	7p13	20	24	25	25	18	17	18	17	20	20	18	19	18.9007	22.5899	22.4642	22.5527	17.3605	16.4506	21.6797	20.9194	20.0534	20.967	18.208	18.904	1.00343	-1.00343	0.982964	0.993218
5781	Q9Y3I0	Q9Y3I0	RTCB	RTCB	RTCB	RNA 2',3'-cyclic phosphate and 5'-OH ligase	22q12.3	18	20	20	20	20	16	26	18	21	16	19	27	17.0106	18.8249	17.9714	18.0421	19.2895	15.4829	31.3151	22.15	21.056	16.7736	19.2195	26.8635	1.28846	-1.28846	0.0656444	0.30764
865	P04632;Q96L46	P04632	CAPNS1;CAPNS2	CAPNS1	CAPNS1	calpain small subunit 1	19q13.12	21	28	22	22	21	21	18	20	17	18	15	17	19.8457	26.3549	19.7685	19.8463	20.254	20.3214	21.6797	24.6111	17.0454	18.8703	15.1733	16.9141	-1.10584	1.10584	0.397628	0.697145
5205	Q9NVI7-2;Q9NVI7;Q9NVI7-3;Q5T2N8;Q5T9A4-2	Q9NVI7-2	ATAD3A;ATAD3C;ATAD3B	ATAD3A	ATAD3A	ATPase family, AAA domain containing 3A	1p36.33	26	26	25	29	16	17	14	12	18	21	23	13	24.5709	24.4724	22.4642	26.1611	15.4316	16.4506	16.862	14.7666	18.048	22.0154	23.2657	12.9343	-1.20074	1.20074	0.176445	0.495156
2512	Q13085;Q13085-4;Q13085-3;Q13085-2;O00763-3;O00763-2;O00763	Q13085	ACACA;ACACB	ACACA	ACACA	acetyl-CoA carboxylase alpha	17q12	26	20	26	23	19	21	8	8	22	17	23	26	24.5709	18.8249	23.3628	20.7484	18.325	20.3214	9.63542	9.84443	22.0587	17.822	23.2657	25.8686	-1.16276	1.16276	0.343793	0.656628
4121	Q96AG4	Q96AG4	LRRC59	LRRC59	LRRC59	leucine rich repeat containing 59	17q21.33	29	25	27	25	15	16	12	11	20	19	21	19	27.406	23.5312	24.2613	22.5527	14.4671	15.4829	14.4531	13.5361	20.0534	19.9187	21.2426	18.904	-1.18124	1.18124	0.243789	0.571567
2558	Q13393-2;Q13393;Q13393-4;Q13393-3	Q13393-2	PLD1	PLD1	PLD1	phospholipase D1	3q26.31	1	3	5	2	2	3	0	0	1	0	0	1	0.945033	2.82374	4.49284	1.80421	1.92895	2.90305	0	0	1.00267	0	0	0.994945	-7.45781	7.45781	0.00182765	0.0415713
3914	Q8WUF5	Q8WUF5	PPP1R13L	PPP1R13L	PPP1R13L	protein phosphatase 1 regulatory subunit 13 like	19q13.32	17	22	24	24	15	15	10	14	28	24	21	24	16.0656	20.7074	21.5656	21.6505	14.4671	14.5153	12.0443	17.2278	28.0747	25.1604	21.2426	23.8787	1.17121	-1.17121	0.20474	0.53436
2198	P63220	P63220	RPS21	RPS21	RPS21	ribosomal protein S21	20q13.33	17	18	18	20	22	22	16	13	23	21	20	27	16.0656	16.9425	16.1742	18.0421	21.2184	21.289	19.2708	15.9972	23.0614	22.0154	20.2311	26.8635	1.16137	-1.16137	0.227408	0.550764
543	O75379-2;O75379	O75379-2	VAMP4	VAMP4	VAMP4	vesicle associated membrane protein 4	1q24.3	2	1	5	4	3	1	0	0	0	0	0	2	1.89007	0.941247	4.49284	3.60842	2.89342	0.967684	0	0	0	0	0	1.98989	-7.43442	7.43442	0.00319112	0.0549076
4344	Q96N67-4;Q96N67-3;Q96N67-5;Q96N67-2;Q96N67-6;Q96N67;Q96N67-7;Q8NF50-4;Q8NF50-3;Q8NF50-2;Q8NF50	Q96N67-4	DOCK7;DOCK8	DOCK7	DOCK7	dedicator of cytokinesis 7	1p31.3	23	18	27	24	21	21	13	7	19	20	22	22	21.7358	16.9425	24.2613	21.6505	20.254	20.3214	15.6576	8.61388	19.0507	20.967	22.2542	21.8888	-1.15432	1.15432	0.344365	0.656753
425	O43924	O43924	PDE6D	PDE6D	PDE6D	phosphodiesterase 6D	2q37.1	2	1	4	6	2	1	0	0	1	0	0	1	1.89007	0.941247	3.59427	5.41264	1.92895	0.967684	0	0	1.00267	0	0	0.994945	-7.37623	7.37623	0.00419629	0.0646089
4124	Q96AQ6-2;Q96AQ6;Q96AQ6-3	Q96AQ6-2	PBXIP1	PBXIP1	PBXIP1	PBX homeobox interacting protein 1	1q21.3	8	6	8	5	15	11	3	1	2	0	0	0	7.56027	5.64748	7.18855	4.51053	14.4671	10.6445	3.61328	1.23055	2.00534	0	0	0	-7.30284	7.30284	0.000102585	0.00979359
2481	Q12904;Q12904-2	Q12904	AIMP1	AIMP1	AIMP1	aminoacyl tRNA synthetase complex interacting multifunctional protein 1	4q24	21	18	24	24	24	18	17	17	16	18	21	18	19.8457	16.9425	21.5656	21.6505	23.1474	17.4183	20.4753	20.9194	16.0427	18.8703	21.2426	17.909	-1.04426	1.04426	0.71689	0.899379
3592	Q8IXQ6-3;Q8IXQ6-2;Q8IXQ6	Q8IXQ6-3	PARP9	PARP9	PARP9	poly(ADP-ribose) polymerase family member 9	3q21.1	1	2	3	7	7	8	2	1	0	0	0	0	0.945033	1.88249	2.6957	6.31474	6.75132	7.74147	2.40886	1.23055	0	0	0	0	-7.2349	7.2349	0.00249709	0.0489476
265	O15042-2;O15042;O15042-3	O15042-2	U2SURP	U2SURP	U2SURP	U2 snRNP associated SURP domain containing	3q23	20	24	22	15	22	20	13	22	18	20	18	21	18.9007	22.5899	19.7685	13.5316	21.2184	19.3537	15.6576	27.0722	18.048	20.967	18.208	20.8939	1.04754	-1.04754	0.744114	0.915297
5470	Q9UH62	Q9UH62	ARMCX3	ARMCX3	ARMCX3	armadillo repeat containing, X-linked 3	Xq22.1	2	1	7	13	1	3	1	1	1	0	0	0	1.89007	0.941247	6.28998	11.7274	0.964474	2.90305	1.20443	1.23055	1.00267	0	0	0	-7.18985	7.18985	0.0200786	0.161832
1925	P52948-5;P52948;P52948-6;P52948-2;P52948-4;P52948-3	P52948-5	NUP98	NUP98	NUP98	nucleoporin 98	11p15.4	19	26	14	17	19	22	18	12	23	20	23	22	17.9556	24.4724	12.58	15.3358	18.325	21.289	21.6797	14.7666	23.0614	20.967	23.2657	21.8888	1.14252	-1.14252	0.277389	0.590811
2150	P62714	P62714	PPP2CB	PPP2CB	PPP2CB	protein phosphatase 2 catalytic subunit beta	8p12	22	24	22	16	19	21	15	15	19	21	22	19	20.7907	22.5899	19.7685	14.4337	18.325	20.3214	18.0664	18.4583	19.0507	22.0154	22.2542	18.904	1.02168	-1.02168	0.841696	0.95331
2517	Q13113	Q13113	PDZK1IP1	PDZK1IP1	PDZK1IP1	PDZK1 interacting protein 1	1p33	1	1	7	7	4	5	0	1	1	0	0	1	0.945033	0.941247	6.28998	6.31474	3.8579	4.83842	0	1.23055	1.00267	0	0	0.994945	-7.18281	7.18281	0.00221982	0.046428
1960	P54578-2;P54578;P54578-3	P54578-2	USP14	USP14	USP14	ubiquitin specific peptidase 14	18p11.32	15	16	28	27	24	19	15	17	18	19	17	19	14.1755	15.06	25.1599	24.3569	23.1474	18.386	18.0664	20.9194	18.048	19.9187	17.1964	18.904	-1.06398	1.06398	0.624358	0.84625
4634	Q9BV73-2;Q9BV73	Q9BV73-2	CEP250	CEP250	CEP250	centrosomal protein 250	20q11.22	9	10	13	15	9	8	1	0	3	2	1	1	8.5053	9.41247	11.6814	13.5316	8.68027	7.74147	1.20443	0	3.00801	2.0967	1.01155	0.994945	-7.16151	7.16151	1.51597e-06	0.000795959
1814	P49773	P49773	HINT1	HINT1	HINT1	histidine triad nucleotide binding protein 1	5q23.3	20	13	17	26	33	27	16	12	17	11	21	20	18.9007	12.2362	15.2757	23.4548	31.8276	26.1275	19.2708	14.7666	17.0454	11.5319	21.2426	19.8989	-1.23195	1.23195	0.243826	0.571567
1921	P52888;P52888-2	P52888	THOP1	THOP1	THOP1	thimet oligopeptidase 1	19p13.3	21	22	26	28	19	16	12	16	16	18	20	19	19.8457	20.7074	23.3628	25.259	18.325	15.4829	14.4531	19.6889	16.0427	18.8703	20.2311	18.904	-1.13673	1.13673	0.341566	0.654494
2923	Q16543	Q16543	CDC37	CDC37	CDC37	cell division cycle 37	19p13.2	19	18	28	25	15	20	14	18	23	17	18	18	17.9556	16.9425	25.1599	22.5527	14.4671	19.3537	16.862	22.15	23.0614	17.822	18.208	17.909	-1.00361	1.00361	0.955497	0.981463
3293	Q6S8J3;A5A3E0	Q6S8J3	POTEE;POTEF	POTEE	POTEE	POTE ankyrin domain family member E	2q21.1	21	22	16	23	16	19	11	14	22	21	22	26	19.8457	20.7074	14.3771	20.7484	15.4316	18.386	13.2487	17.2278	22.0587	22.0154	22.2542	25.8686	1.12034	-1.12034	0.3452	0.657069
5567	Q9UKY7;Q9UKY7-2;Q9UKY7-3	Q9UKY7	CDV3	CDV3	CDV3	CDV3 homolog	3q22.1	23	22	24	24	14	20	15	11	22	15	21	22	21.7358	20.7074	21.5656	21.6505	13.5026	19.3537	18.0664	13.5361	22.0587	15.7253	21.2426	21.8888	-1.05331	1.05331	0.747603	0.917682
1055	P11177-2;P11177;P11177-3	P11177-2	PDHB	PDHB	PDHB	pyruvate dehydrogenase E1 beta subunit	3p14.3	20	23	21	23	16	20	22	20	16	20	15	16	18.9007	21.6487	18.8699	20.7484	15.4316	19.3537	26.4974	24.6111	16.0427	20.967	15.1733	15.9191	1.03704	-1.03704	0.901485	0.967903
1112	P13804;P13804-2	P13804	ETFA	ETFA	ETFA	electron transfer flavoprotein alpha subunit	15q24.2-q24.3	17	19	23	23	22	20	26	23	17	13	14	15	16.0656	17.8837	20.6671	20.7484	21.2184	19.3537	31.3151	28.3027	17.0454	13.6286	14.1617	14.9242	1.02968	-1.02968	0.982526	0.993218
1162	P15880	P15880	RPS2	RPS2	RPS2	ribosomal protein S2	16p13.3	20	23	18	19	17	15	19	22	19	22	17	21	18.9007	21.6487	16.1742	17.14	16.3961	14.5153	22.8841	27.0722	19.0507	23.0637	17.1964	20.8939	1.24229	-1.24229	0.126518	0.407938
2141	P62333	P62333	PSMC6	PSMC6	PSMC6	proteasome 26S subunit, ATPase 6	14q22.1	22	17	21	22	20	19	14	11	22	16	23	25	20.7907	16.0012	18.8699	19.8463	19.2895	18.386	16.862	13.5361	22.0587	16.7736	23.2657	24.8736	1.03699	-1.03699	0.71497	0.897731
2562	Q13409-6;Q13409-3;Q13409-7;Q13409-2;Q13409-5;Q13409	Q13409-6	DYNC1I2	DYNC1I2	DYNC1I2	dynein cytoplasmic 1 intermediate chain 2	2q31.1	21	25	25	18	20	18	12	14	18	21	24	16	19.8457	23.5312	22.4642	16.2379	19.2895	17.4183	14.4531	17.2278	18.048	22.0154	24.2773	15.9191	-1.06116	1.06116	0.695042	0.887101
2283	Q00325-2;Q00325	Q00325-2	SLC25A3	SLC25A3	SLC25A3	solute carrier family 25 member 3	12q23.1	19	24	16	18	21	16	20	17	22	20	17	21	17.9556	22.5899	14.3771	16.2379	20.254	15.4829	24.0886	20.9194	22.0587	20.967	17.1964	20.8939	1.17986	-1.17986	0.226759	0.550764
2996	Q3KQU3;Q3KQU3-2;Q3KQU3-3	Q3KQU3	MAP7D1	MAP7D1	MAP7D1	MAP7 domain containing 1	1p34.3	20	23	20	22	20	16	14	19	19	18	19	21	18.9007	21.6487	17.9714	19.8463	19.2895	15.4829	16.862	23.3805	19.0507	18.8703	19.2195	20.8939	1.04541	-1.04541	0.754751	0.920855
3752	Q8NBS9;Q8NBS9-2	Q8NBS9	TXNDC5	TXNDC5	TXNDC5	thioredoxin domain containing 5	6p24.3	19	21	19	19	16	18	15	14	21	23	24	22	17.9556	19.7662	17.0728	17.14	15.4316	17.4183	18.0664	17.2278	21.056	24.1121	24.2773	21.8888	1.20846	-1.20846	0.146053	0.444009
147	O00425;O00425-2;Q9NZI8-2;Q9NZI8	O00425	IGF2BP3;IGF2BP1	IGF2BP3	IGF2BP3	insulin like growth factor 2 mRNA binding protein 3	7p15.3	20	22	28	27	19	20	19	15	16	16	16	12	18.9007	20.7074	25.1599	24.3569	18.325	19.3537	22.8841	18.4583	16.0427	16.7736	16.1849	11.9393	-1.23973	1.23973	0.0928293	0.351225
776	O95819;O95819-4;O95819-2	O95819	MAP4K4	MAP4K4	MAP4K4	mitogen-activated protein kinase kinase kinase kinase 4	2q11.2	26	24	17	14	17	20	21	22	19	15	16	19	24.5709	22.5899	15.2757	12.6295	16.3961	19.3537	25.293	27.0722	19.0507	15.7253	16.1849	18.904	1.103	-1.103	0.525296	0.798261
1303	P22307-7;P22307-8;P22307;P22307-4;P22307-6;P22307-2;P22307-5;P22307-3	P22307-7	SCP2	SCP2	SCP2	sterol carrier protein 2	1p32.3	21	21	22	23	25	23	17	13	17	12	17	19	19.8457	19.7662	19.7685	20.7484	24.1118	22.2567	20.4753	15.9972	17.0454	12.5802	17.1964	18.904	-1.23776	1.23776	0.119189	0.397454
1691	P43686;P43686-2	P43686	PSMC4	PSMC4	PSMC4	proteasome 26S subunit, ATPase 4	19q13.11-q13.13	22	19	25	22	22	19	10	13	25	18	16	19	20.7907	17.8837	22.4642	19.8463	21.2184	18.386	12.0443	15.9972	25.0667	18.8703	16.1849	18.904	-1.12629	1.12629	0.426748	0.718694
2056	P60981;P60981-2	P60981	DSTN	DSTN	DSTN	destrin, actin depolymerizing factor	20p12.1	22	24	22	23	20	19	20	13	16	17	17	17	20.7907	22.5899	19.7685	20.7484	19.2895	18.386	24.0886	15.9972	16.0427	17.822	17.1964	16.9141	-1.12504	1.12504	0.362042	0.668562
1196	P17174;P17174-2	P17174	GOT1	GOT1	GOT1	glutamic-oxaloacetic transaminase 1	10q24.2	18	15	19	19	27	24	15	15	17	15	19	26	17.0106	14.1187	17.0728	17.14	26.0408	23.2244	18.0664	18.4583	17.0454	15.7253	19.2195	25.8686	-1.00196	1.00196	0.962236	0.985206
423	O43896	O43896	KIF1C	KIF1C	KIF1C	kinesin family member 1C	17p13.2	5	5	5	2	4	2	0	0	1	0	1	1	4.72517	4.70624	4.49284	1.80421	3.8579	1.93537	0	0	1.00267	0	1.01155	0.994945	-7.15205	7.15205	0.000330271	0.0165608
4280	Q96I24;Q96I24-2	Q96I24	FUBP3	FUBP3	FUBP3	far upstream element binding protein 3	9q34.11-q34.12	24	23	21	21	16	20	13	16	21	21	19	14	22.6808	21.6487	18.8699	18.9442	15.4316	19.3537	15.6576	19.6889	21.056	22.0154	19.2195	13.9292	-1.04806	1.04806	0.733557	0.909875
2229	P78357	P78357	CNTNAP1	CNTNAP1	CNTNAP1	contactin associated protein 1	17q21.2	3	2	5	6	4	3	0	0	1	0	1	1	2.8351	1.88249	4.49284	5.41264	3.8579	2.90305	0	0	1.00267	0	1.01155	0.994945	-7.10629	7.10629	0.000296521	0.0158417
4530	Q9BQG0;Q9BQG0-2	Q9BQG0	MYBBP1A	MYBBP1A	MYBBP1A	MYB binding protein 1a	17p13.2	26	21	32	24	13	15	12	14	20	9	25	17	24.5709	19.7662	28.7542	21.6505	12.5382	14.5153	14.4531	17.2278	20.0534	9.43516	25.2888	16.9141	-1.17822	1.17822	0.334358	0.652295
5551	Q9UKG1	Q9UKG1	APPL1	APPL1	APPL1	adaptor protein, phosphotyrosine interacting with PH domain and leucine zipper 1	3p14.3	22	20	25	29	19	22	14	14	19	13	16	15	20.7907	18.8249	22.4642	26.1611	18.325	21.289	16.862	17.2278	19.0507	13.6286	16.1849	14.9242	-1.30627	1.30627	0.0502729	0.273353
1689	P43487-2;P43487	P43487-2	RANBP1	RANBP1	RANBP1	RAN binding protein 1	22q11.21	22	22	19	25	17	19	14	14	21	18	18	18	20.7907	20.7074	17.0728	22.5527	16.3961	18.386	16.862	17.2278	21.056	18.8703	18.208	17.909	-1.05241	1.05241	0.727994	0.906776
3561	Q8IWB7	Q8IWB7	WDFY1	WDFY1	WDFY1	WD repeat and FYVE domain containing 1	2q36.1	5	2	1	1	2	4	0	0	0	0	1	1	4.72517	1.88249	0.898568	0.902106	1.92895	3.87073	0	0	0	0	1.01155	0.994945	-7.081	7.081	0.00457956	0.0674289
2675	Q14185	Q14185	DOCK1	DOCK1	DOCK1	dedicator of cytokinesis 1	10q26.2	3	3	3	1	3	2	0	0	0	0	1	1	2.8351	2.82374	2.6957	0.902106	2.89342	1.93537	0	0	0	0	1.01155	0.994945	-7.01991	7.01991	0.00248723	0.0489476
5270	Q9NXS2;Q9NXS2-3	Q9NXS2	QPCTL	QPCTL	QPCTL	glutaminyl-peptide cyclotransferase like	19q13.32	0	1	5	6	2	1	0	0	0	0	1	1	0	0.941247	4.49284	5.41264	1.92895	0.967684	0	0	0	0	1.01155	0.994945	-6.84942	6.84942	0.0301067	0.201254
2548	Q13310-2;Q13310-3;Q13310;P0CB38	Q13310-2	PABPC4;PABPC4L	PABPC4	PABPC4	poly(A) binding protein cytoplasmic 4	1p34.3	23	20	24	28	20	19	15	14	11	16	20	16	21.7358	18.8249	21.5656	25.259	19.2895	18.386	18.0664	17.2278	11.0294	16.7736	20.2311	15.9191	-1.26009	1.26009	0.0859042	0.336288
5687	Q9Y263	Q9Y263	PLAA	PLAA	PLAA	phospholipase A2 activating protein	9p21.2	22	20	20	25	25	23	13	15	19	19	13	12	20.7907	18.8249	17.9714	22.5527	24.1118	22.2567	15.6576	18.4583	19.0507	19.9187	13.1502	11.9393	-1.2886	1.2886	0.0640979	0.303558
3372	Q7L523;Q5VZM2-2;Q5VZM2	Q7L523	RRAGA;RRAGB	RRAGA	RRAGA	Ras related GTP binding A	9p22.1	2	4	5	7	3	3	1	0	0	1	1	0	1.89007	3.76499	4.49284	6.31474	2.89342	2.90305	1.20443	0	0	1.04835	1.01155	0	-6.81889	6.81889	0.000308794	0.0160329
1788	P49454	P49454	CENPF	CENPF	CENPF	centromere protein F	1q41	30	26	10	5	16	14	12	10	24	28	29	21	28.351	24.4724	8.98568	4.51053	15.4316	13.5476	14.4531	12.3055	24.064	29.3538	29.335	20.8939	1.36839	-1.36839	0.140125	0.431305
3223	Q6IBS0;Q9NR96-4	Q6IBS0	TWF2;TLR9	TWF2	TWF2	twinfilin actin binding protein 2	3p21.2	21	21	20	20	19	23	16	12	15	21	19	18	19.8457	19.7662	17.9714	18.0421	18.325	22.2567	19.2708	14.7666	15.04	22.0154	19.2195	17.909	-1.07379	1.07379	0.622164	0.844745
1490	P30876	P30876	POLR2B	POLR2B	POLR2B	RNA polymerase II subunit B	4q12	16	22	16	15	18	22	14	27	17	20	16	21	15.1205	20.7074	14.3771	13.5316	17.3605	21.289	16.862	33.225	17.0454	20.967	16.1849	20.8939	1.22261	-1.22261	0.167235	0.479344
2261	P84090	P84090	ERH	ERH	ERH	ERH, mRNA splicing and mitosis factor	14q24.1	19	17	15	18	24	22	15	14	20	17	23	20	17.9556	16.0012	13.4785	16.2379	23.1474	21.289	18.0664	17.2278	20.0534	17.822	23.2657	19.8989	1.07608	-1.07608	0.54216	0.812828
3008	Q460N5-1;Q460N5;Q460N5-4;Q460N5-3;Q460N5-5	Q460N5-1	PARP14	PARP14	PARP14	poly(ADP-ribose) polymerase family member 14	3q21.1	3	3	17	13	12	10	2	2	1	1	1	0	2.8351	2.82374	15.2757	11.7274	11.5737	9.67684	2.40886	2.46111	1.00267	1.04835	1.01155	0	-6.79636	6.79636	0.00098085	0.0303961
1092	P13073	P13073	COX4I1	COX4I1	COX4I1	cytochrome c oxidase subunit 4I1	16q24.1	16	20	21	23	23	22	13	16	16	16	19	18	15.1205	18.8249	18.8699	20.7484	22.1829	21.289	15.6576	19.6889	16.0427	16.7736	19.2195	17.909	-1.11154	1.11154	0.44779	0.740147
1486	P30626-3;P30626-2;P30626	P30626-3	SRI	SRI	SRI	sorcin	7q21.12	21	18	24	25	19	23	17	14	16	14	14	18	19.8457	16.9425	21.5656	22.5527	18.325	22.2567	20.4753	17.2278	16.0427	14.6769	14.1617	17.909	-1.20892	1.20892	0.15786	0.460735
2333	Q02338	Q02338	BDH1	BDH1	BDH1	3-hydroxybutyrate dehydrogenase 1	3q29	1	1	5	4	3	2	1	0	1	0	0	0	0.945033	0.941247	4.49284	3.60842	2.89342	1.93537	1.20443	0	1.00267	0	0	0	-6.71304	6.71304	0.00276205	0.0507578
3640	Q8N108-17;Q8N108;Q8N108-13;Q8N108-12;Q8N108-19;Q8N108-16;Q8N108-14;Q8N108-18;Q8N108-15	Q8N108-17	MIER1	MIER1	MIER1	MIER1 transcriptional regulator	1p31.3	0	1	1	1	2	2	0	0	1	0	0	0	0	0.941247	0.898568	0.902106	1.92895	1.93537	0	0	1.00267	0	0	0	-6.58865	6.58865	0.0414523	0.24224
869	P04844-2;P04844	P04844-2	RPN2	RPN2	RPN2	ribophorin II	20q11.23	22	21	22	18	20	19	15	11	18	16	19	21	20.7907	19.7662	19.7685	16.2379	19.2895	18.386	18.0664	13.5361	18.048	16.7736	19.2195	20.8939	-1.07229	1.07229	0.656187	0.863297
1487	P30740;P30740-2;P50453;O75830	P30740	SERPINB1;SERPINB9;SERPINI2	SERPINB1	SERPINB1	serpin family B member 1	6p25.2	20	23	19	25	16	18	22	19	13	17	15	15	18.9007	21.6487	17.0728	22.5527	15.4316	17.4183	26.4974	23.3805	13.0347	17.822	15.1733	14.9242	-1.01978	1.01978	0.75702	0.921621
2293	Q00653-4;Q00653;Q00653-3	Q00653-4	NFKB2	NFKB2	NFKB2	nuclear factor kappa B subunit 2	10q24.32	17	20	23	22	22	19	11	12	19	20	19	18	16.0656	18.8249	20.6671	19.8463	21.2184	18.386	13.2487	14.7666	19.0507	20.967	19.2195	17.909	-1.09363	1.09363	0.564099	0.825643
3389	Q7Z2K6;Q7Z2K6-2	Q7Z2K6	ERMP1	ERMP1	ERMP1	endoplasmic reticulum metallopeptidase 1	9p24.1	24	19	25	24	22	22	30	31	6	7	6	6	22.6808	17.8837	22.4642	21.6505	21.2184	21.289	36.1328	38.1472	6.01601	7.33846	6.06932	5.96967	-1.27603	1.27603	0.11011	0.384421
3464	Q86UE4	Q86UE4	MTDH	MTDH	MTDH	metadherin	8q22.1	19	18	15	15	21	22	28	20	13	17	17	17	17.9556	16.9425	13.4785	13.5316	20.254	21.289	33.724	24.6111	13.0347	17.822	17.1964	16.9141	1.19189	-1.19189	0.313478	0.629189
5105	Q9NR45	Q9NR45	NANS	NANS	NANS	N-acetylneuraminate synthase	9q22.33	22	23	24	31	17	15	13	11	14	16	20	16	20.7907	21.6487	21.5656	27.9653	16.3961	14.5153	15.6576	13.5361	14.0374	16.7736	20.2311	15.9191	-1.27796	1.27796	0.0813964	0.326192
[truncated: 5,086 more rows]
