# Supplementary material for: Loss of FLCN-FNIP1/2 induces a non-canonical interferon response in human renal tubular epithelial cells
Source: eLife. 2021 Jan 18;10:e61630. doi: 10.7554/eLife.61630 (PMC7899648; doi:10.7554/eLife.61630)
Supplement: Supplementary file 2. [file elife-61630-supp2.xlsx]

## Sheet: Blad1
Subset of TFE3 targets upregulated in FLCNNEG RPTEC (cluster 3, boxed yellow in Figure 3A)
M6PR
TGM2
SLC36A1
SMPD1
MLPH
PIP4P1
ATG4D
SLC38A6
BAD
ATP6V1B2
ATP6V0D2
RAB7A
VPS8
HPS5
FAS
EPDR1
DNASE2
ANXA9
GK5
LIPA
MCOLN1
GPR137B
CPEB1
ATP6V0D1
GBA
UVRAG
CTSL
ATP6V1G1
STK33
NAGPA
SCPEP1
GABARAP
WDR19
VPS11
SGSH
VPS18
ATP6V1C1
CTSD
MANBA
CD63
NPC1
ATP6V0C
TMEM192
CPVL
LITAF
FBXO32
BCL2
EPAS1
CHN2
ARSG
APP
CD68
ESRRG
GNPTG
HPS1
OSTM1
SQSTM1
PSAP
ANK2
RRAGC
GM2A
CTSH
CTSB
VPS33A
PPT1
GLMP
EPB41
FNIP2
GPNMB
SLC17A5
ARHGAP12
AMDHD2
CTNS
ATP6V1E1
HEXB
NPC2
NEU1
CLCN7
CLN3
SULT1C2
TPP1
CTSA
ATP6V0E1
ASAH1
NAGLU
MVP
ATP6V0B
HRK
ATP6V1H
ATP6V1D
HPSE
IL17RD
CTSS
DAPK1
LAMP3
CREG1
TMEM9
LGMN
LAMP2
ATP6V0A1
IFI30
ATP6AP1
ATG4A
GLA
ARSA
CTH
MPO
TSPAN1
PPM1H
ATG9B
GLB1
SIAE
IDUA
FUCA1
GABARAPL2
