# Supplementary figures and images for: Loss of FLCN-FNIP1/2 induces a non-canonical interferon response in human renal tubular epithelial cells
Source: eLife journal article supplement (doi:10.7554/elife.61630), 2021-01-18

A

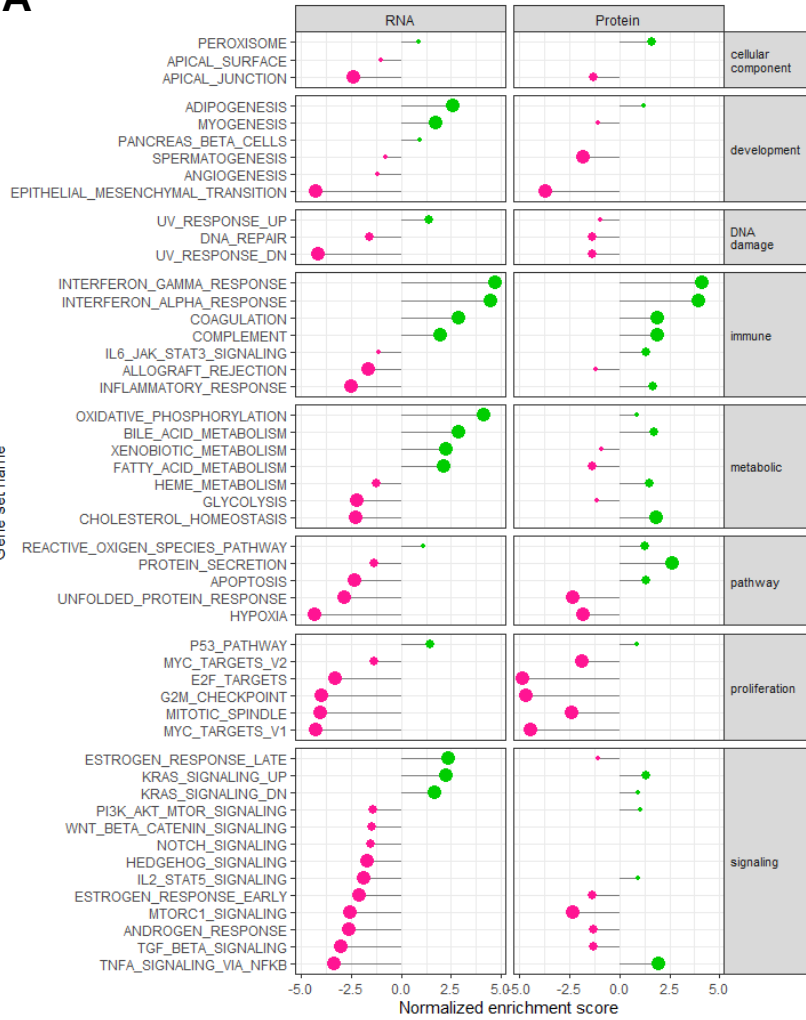

C

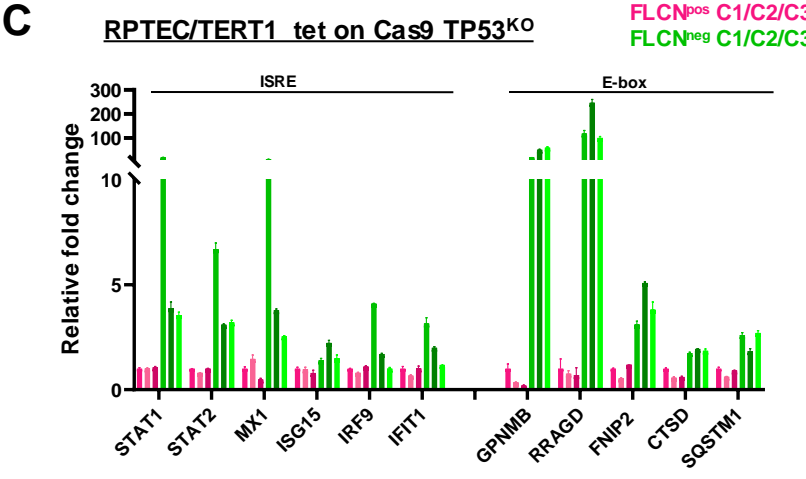

D

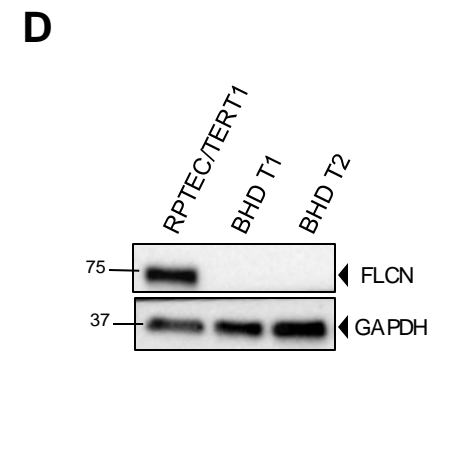

E

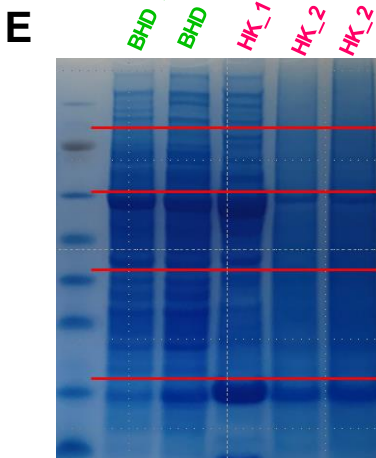

B

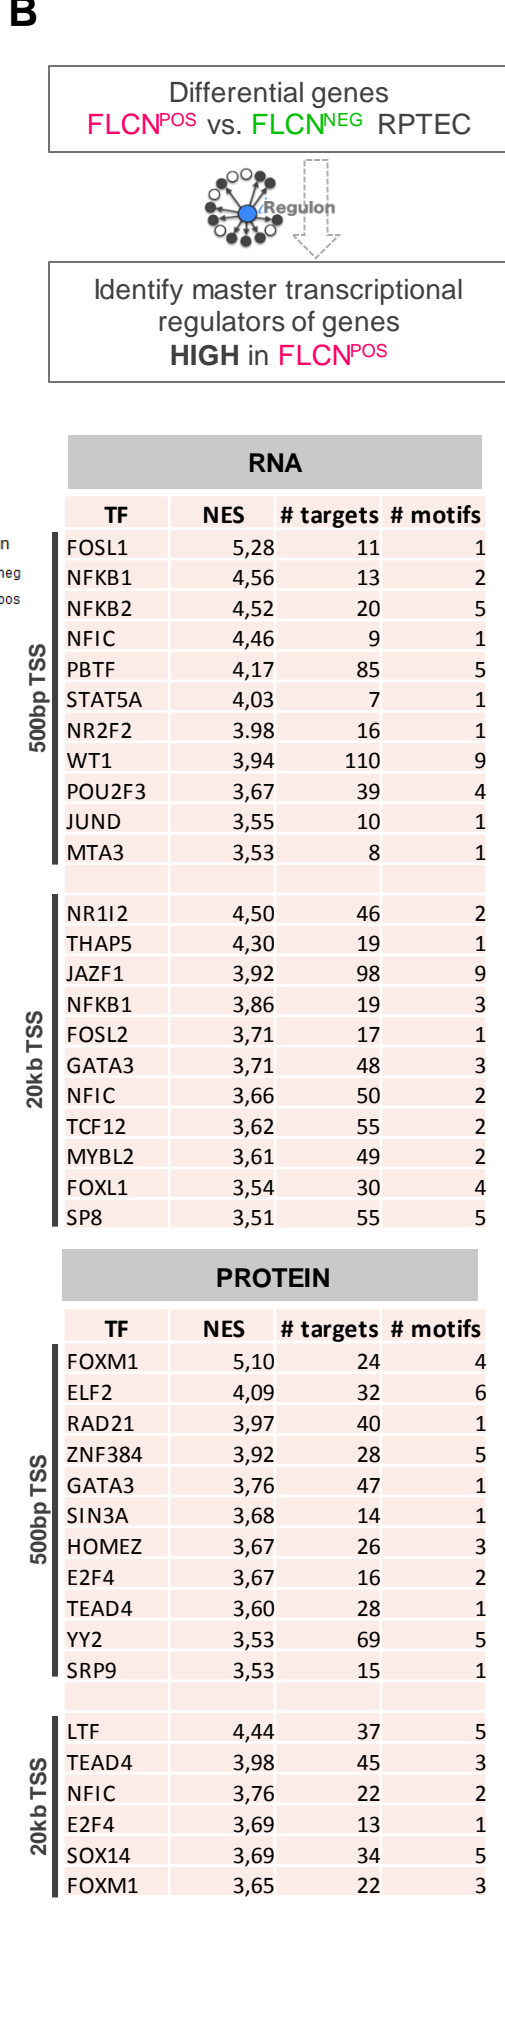

Supplement: supp [file elife-61630-supp-v1.zip]

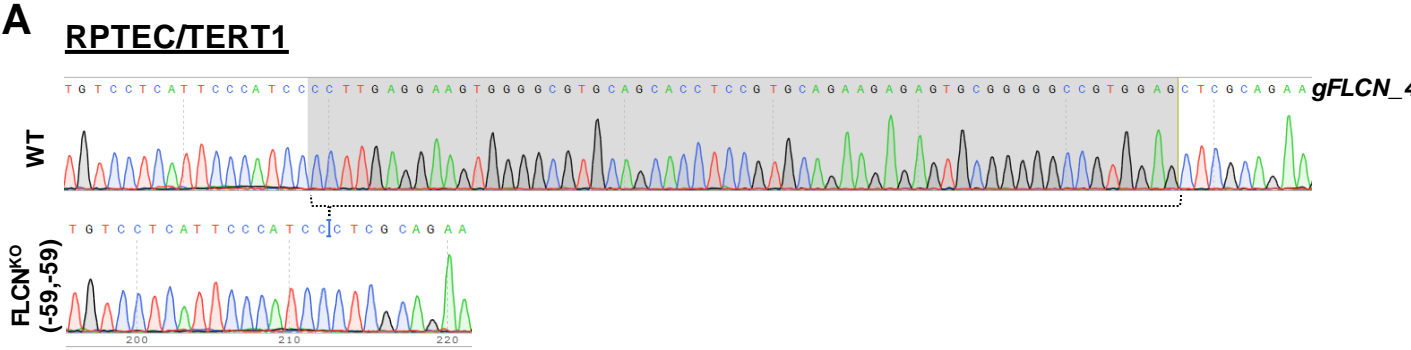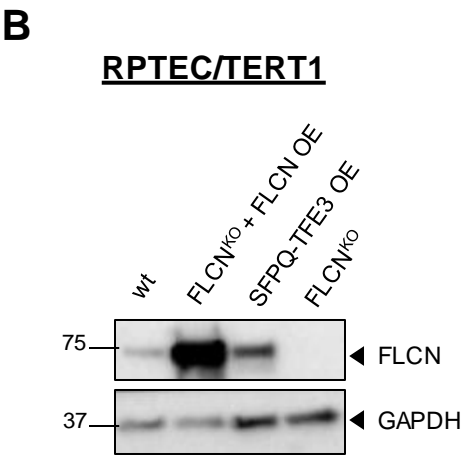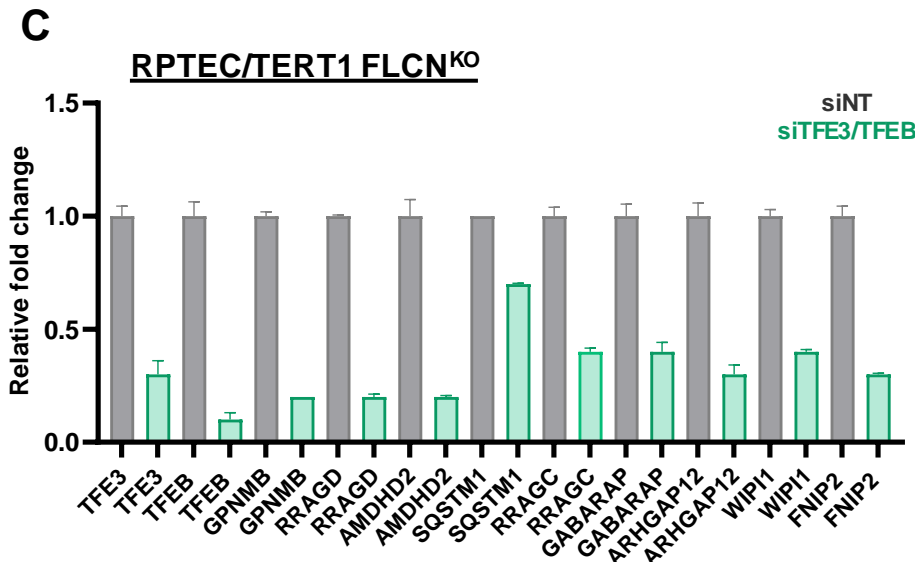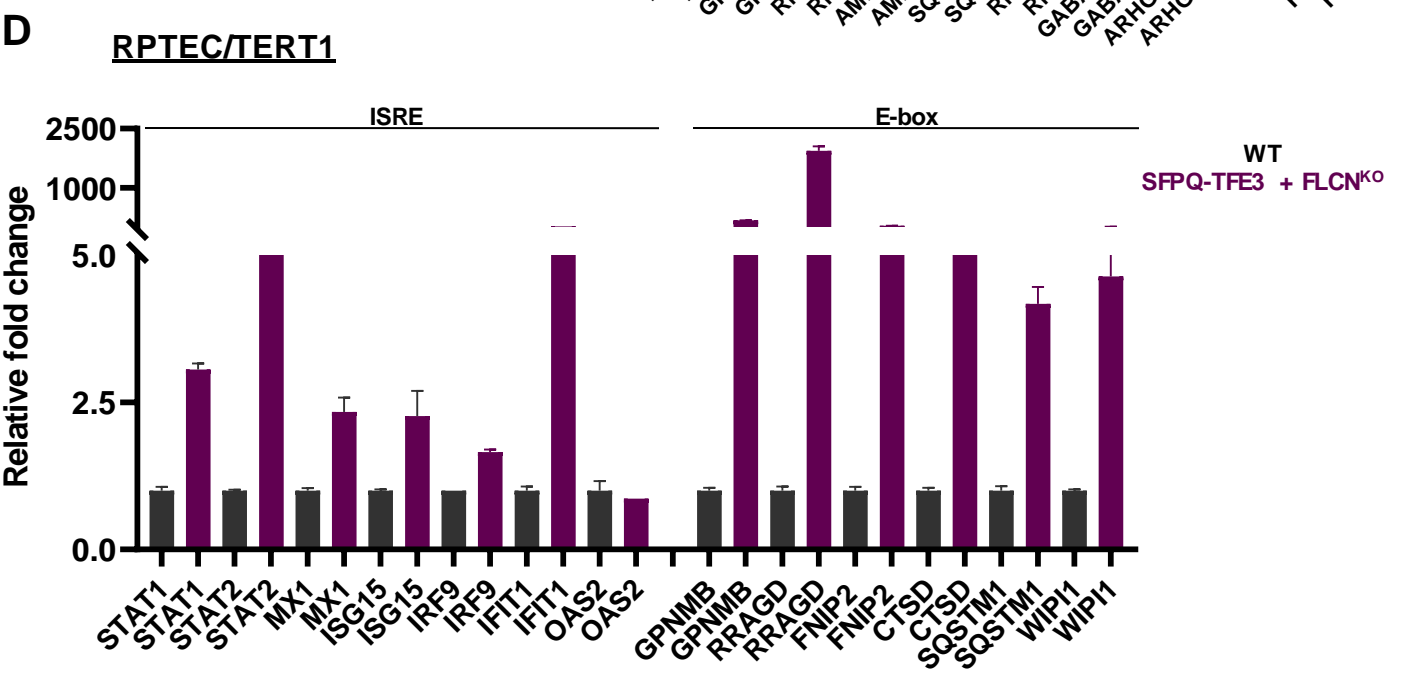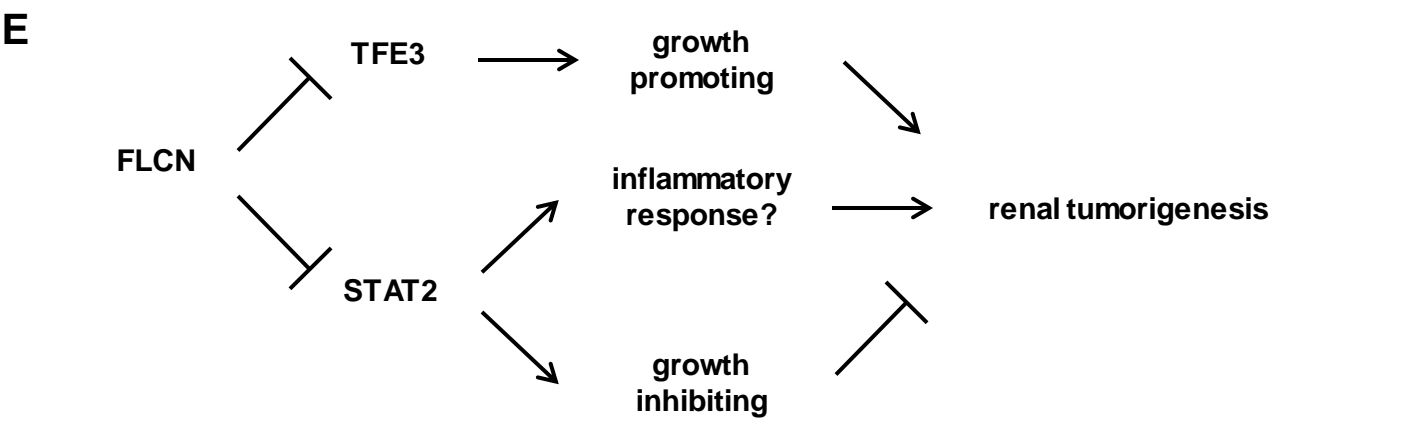

Supplement: supp [file elife-61630-supp-v1.zip]

**A**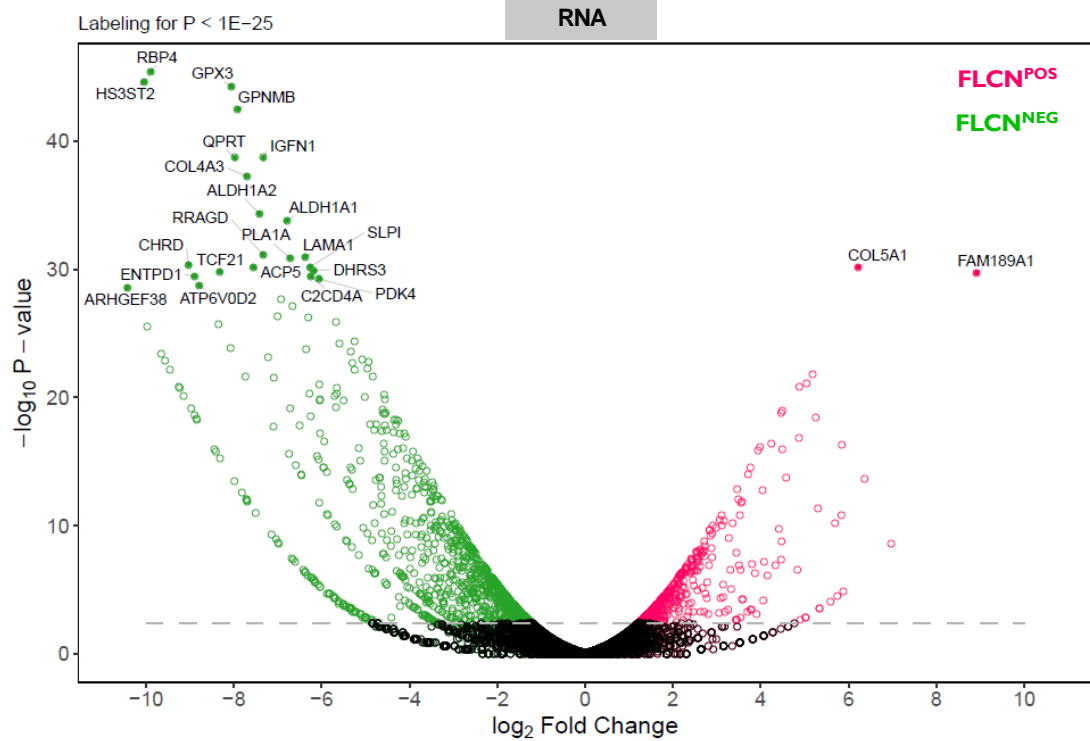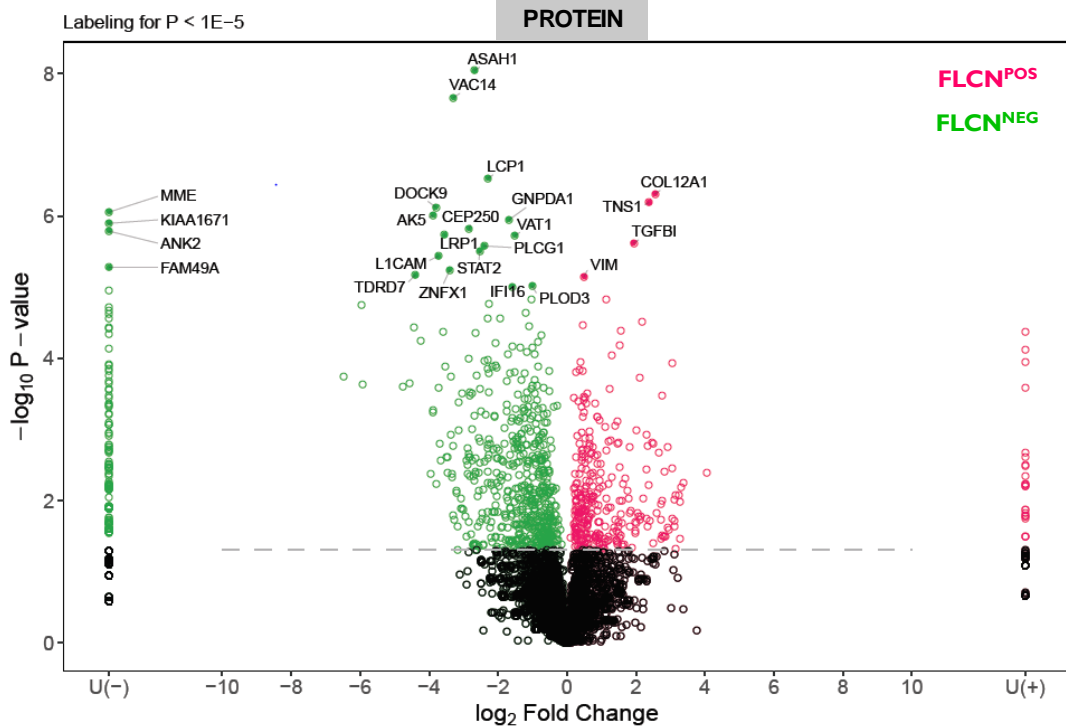**B**

**RPTEC/TERT1 tet on Cas9 TP53<sup>wt</sup>**

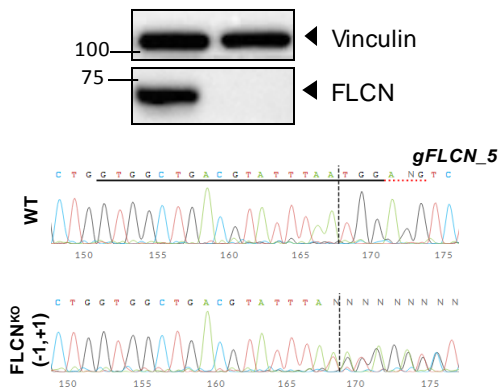**C**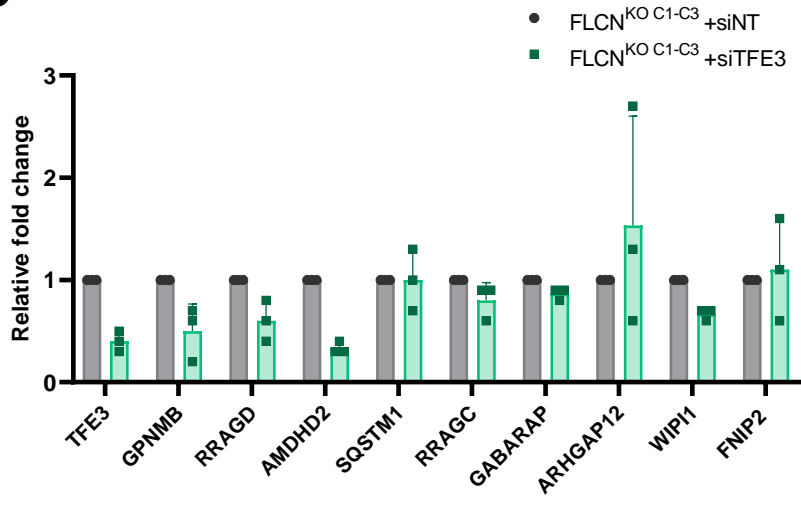

Supplement: supp [file elife-61630-supp-v1.zip]

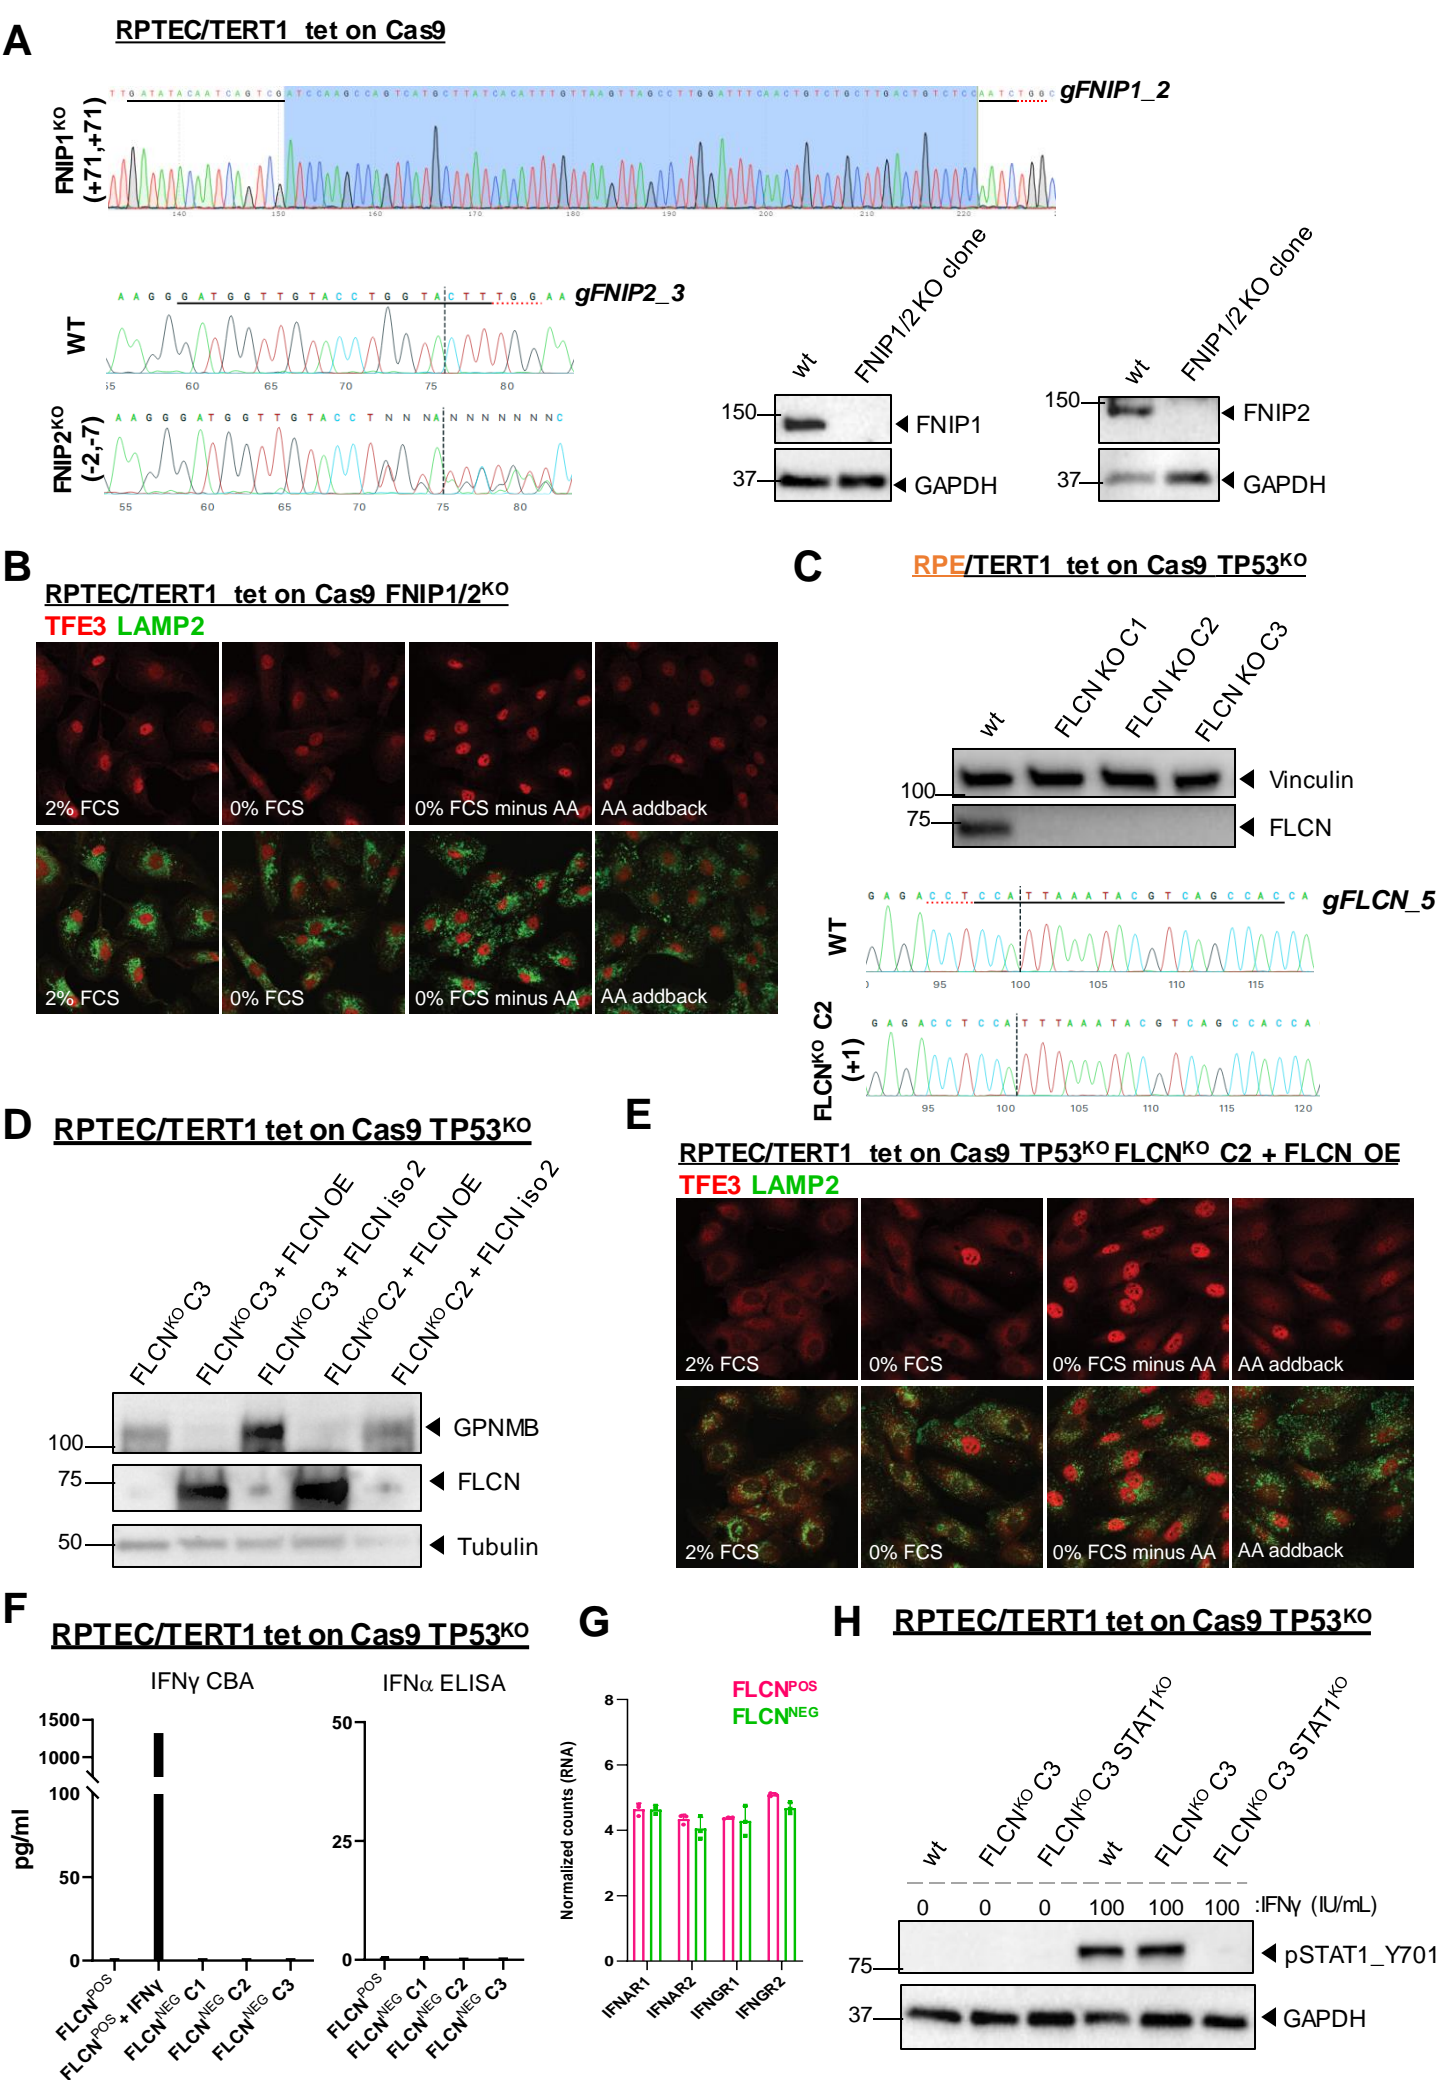

Supplement: supp [file elife-61630-supp-v1.zip]
